# Supplementary material for: C3-selective C–H thiolation of quinolines via an N-arylmethyl activation strategy
Source: Royal Society of Chemistry journal article supplement (doi:10.1039/d3qo00244f), 2023-01-01

## Supporting Information

### **C3-Selective C-H Thiolation of Quinolines via an *N*-Arylmethyl Activation Strategy**

Shun Li, Juan Tang, Yi-Hua Fu, Xue-Li Zheng, Mao-Lin Yuan, Rui-Xiang Li, Zhi-Shan Su,  
Hai-Yan Fu \* and Hua Chen \*

\* Key Laboratory of Green Chemistry & Technology, Ministry of Education, College of  
Chemistry, Sichuan University, Chengdu 610064, P. R. China.

Fax: (+86)-28-8541-2904; E-mail: scufhy@scu.edu.cn ; scuhchen@scu.edu.cn

# Table of Contents

|                                                                                             |    |
|---------------------------------------------------------------------------------------------|----|
| 1. General Information.....                                                                 | 3  |
| 2. Experimental Procedure.....                                                              | 3  |
| 2.1 Synthesis of <i>N</i> -heteroarenium Halide Salts. ....                                 | 3  |
| 2.2 Synthesis of Quinoline Derivatives Containing Bioactive Molecules. <sup>[1]</sup> ..... | 3  |
| 2.3 Synthesis of quinoline 1-oxide 1c.....                                                  | 10 |
| 2.4 Synthesis of benzoyl(quinolin-1-ium-1-yl)amide 1b.....                                  | 10 |
| 2.5 General procedure for the Synthesis of 3a-3r and 5a-10a.....                            | 10 |
| 2.6 General procedure for the Synthesis of 4a-4j and 5b-10b. ....                           | 11 |
| 2.7 Optimization Results of the Reaction Conditions for the synthesis of product 3a. ....   | 11 |
| Table S1. Optimization of reaction condition <sup>[a, b]</sup> .....                        | 11 |
| 2.8 Optimization Results of the Reaction Conditions for the synthesis of product 4a. ....   | 13 |
| 2.9 Useful Transformation and Scale-up Reaction .....                                       | 14 |
| 2.10. Mechanism studies.....                                                                | 15 |
| 2.11. Computational studies.....                                                            | 21 |
| 2.12. Cyclic Voltammetry.....                                                               | 28 |
| 2.13. Additional evidence for mechanism studies via HMRS and GCMS.....                      | 28 |
| 2.14. X-Ray crystallographic data. ....                                                     | 29 |
| 3. References.....                                                                          | 31 |
| 4. Characterization Data.....                                                               | 32 |
| 5. Spectra.....                                                                             | 64 |

## 1. General Information

<sup>1</sup>H NMR spectra were recorded on Bruker 400 MHz spectrometer and the chemical shifts were reported in parts per million (δ) relative to internal standard TMS (0 ppm) for CDCl<sub>3</sub>. The peak patterns are indicated as follows: s, singlet; d, doublet; dd, doublet of doublet; t, triplet; m, multiplet; q, quartet. The coupling constants, *J*, are reported in Hertz (Hz). <sup>13</sup>C NMR spectra were obtained at Bruker 101 MHz and referenced to the internal solvent signals (central peak is 77.0 ppm in CDCl<sub>3</sub>). <sup>19</sup>F NMR were obtained at Bruker 376 MHz (CFCl<sub>3</sub> as outside standard and low field is positive). GC-MS analysis was recorded on GCMS-QP2020 of SHIMADZU. The NMR yield was determined by <sup>19</sup>F NMR using trifluorotoluene as an internal standard. HRMS was recorded on a commercial apparatus (ESI Source, TOF). All reagents were weighed and handled in air at room temperature. All solvents, reagents, and deuterated solvents were purchased from Aladdin, Aldrich, Adamas, and TCI without further purification.

## 2. Experimental Procedure

### 2.1 Synthesis of *N*-heteroarenium Halide Salts.

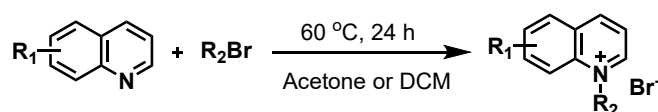

**Method 1:** Derivatives of quinoline (3 mmol), alkyl bromide (6 mmol) and acetone (5 mL) were introduced in a flask (50 mL). The resulting mixture was then stirred at 60 °C for 24 hours. Then, the solvent was removed. The reaction mixture was washed with small amount of diethyl ether and finally dried under vacuum to get the salts (**1a,1ab-1bn**).

**Method 2:** Derivatives of quinoline (3 mmol), alkyl bromide (6 mmol) and dichloromethane (DCM, 5-10 mL) were introduced in a flask (50 mL). The resulting mixture was stirred at 60 °C for 24 hours. Then, the solvent was removed. Finally, the residue was purified by flash chromatography on silica gel with dichloromethane/ethanol to give corresponding quinoline derivatives (**1bo-1bz**).

### 2.2 Synthesis of Quinoline Derivatives Containing Bioactive Molecules.<sup>[1]</sup>

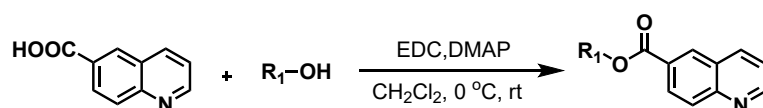

To a suspension of quinoline-6-carboxylic acid (5 mmol) in DCM (10 mL) was added DMAP (4-(dimethylamino)-pyridine, 10 mmol) in one portion at room temperature. The reaction mixture was stirred for 10 min at room temperature. *N*-(3-(Dimethylamino)propyl)-*N*'-ethylcarbodiimide hydrochloride (EDC, 5 mmol) was added at 0 °C. Then the resultant

suspension was stirred for 10 min at 0 °C. A solution of alcohol (R<sub>3</sub>-OH) (4 mmol) in CH<sub>2</sub>Cl<sub>2</sub> was added at 0 °C. The cooling bath was removed, and the reaction mixture was stirred at room temperature for 16 h. The solution was diluted by the addition of saturated aqueous NH<sub>4</sub>Cl solution and CH<sub>2</sub>Cl<sub>2</sub> at room temperature. The organic phase was dried with anhydrous sodium sulfate, and then concentrated by removing the solvent under vacuum. Finally, the residue was purified by flash chromatography on silica gel with petroleum ether/ethyl acetate to give corresponding quinoline derivatives. The product S1, S3 and S4 have been reported in the known literature. [1]

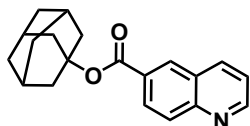

**adamantan-1-yl quinoline-6-carboxylate (S1):** White solid, 91 % yield. <sup>1</sup>H NMR (400 MHz, Chloroform-*d*) δ 8.98 (dd, *J* = 4.3, 1.8 Hz, 1H), 8.51 (d, *J* = 1.8 Hz, 1H), 8.25 (dd, *J* = 8.9, 1.8 Hz, 2H), 8.12 (d, *J* = 8.8 Hz, 1H), 7.45 (dd, *J* = 8.3, 4.3 Hz, 1H), 2.31 (s, 6H), 2.25 (s, 3H), 1.78 – 1.68 (m, 6H).

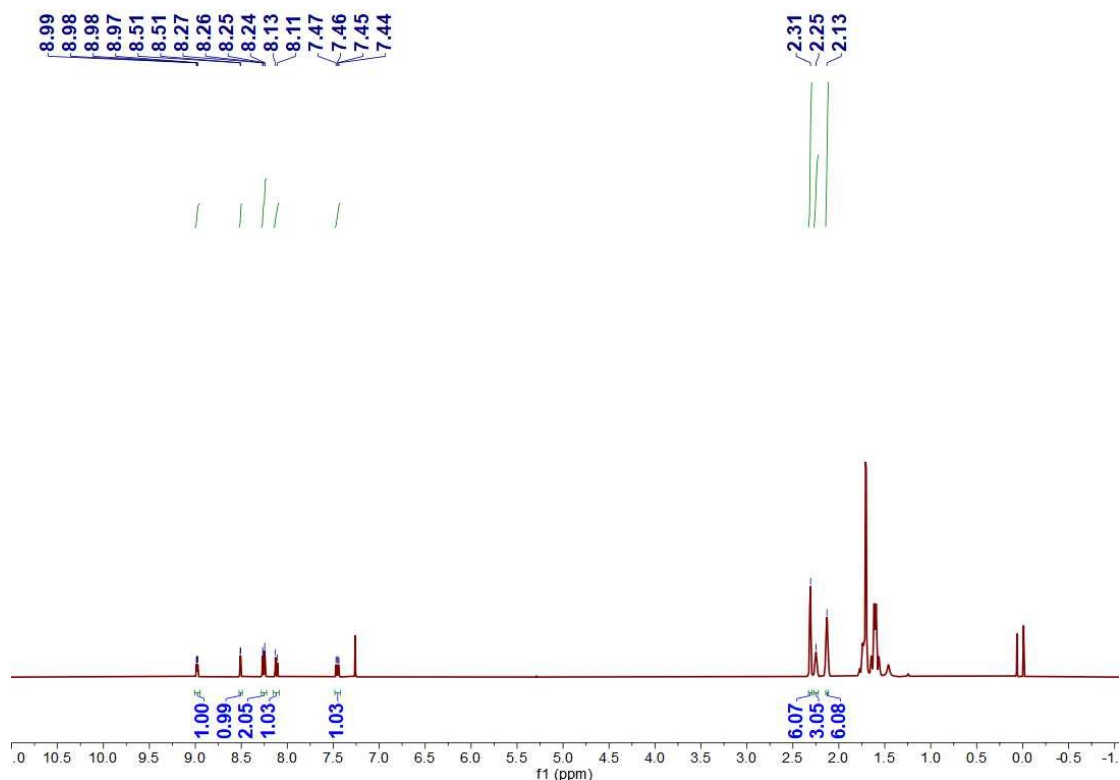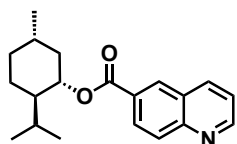

**(1S,2R,5S)-2-isopropyl-5-methylcyclohexyl quinoline-6-carboxylate (S2):** White solid, 90 % yield. <sup>1</sup>H NMR (400 MHz, Chloroform-*d*) δ 9.01 (dd, *J* = 4.2, 1.8 Hz, 1H), 8.59 (d, *J* = 1.9 Hz, 1H), 8.32 (dd, *J* = 8.8, 1.9 Hz, 1H), 8.29 (dd, *J* = 8.3, 1.7 Hz, 1H), 8.16 (d, *J* = 8.8 Hz, 1H), 7.47 (dd, *J* = 8.3, 4.2 Hz, 1H), 5.02 (td, *J* = 10.9, 4.4 Hz, 1H), 2.24 – 2.08 (m, 2H), 2.01 (pd, *J* = 7.0, 2.8 Hz, 1H),

1.82 – 1.70 (m, 2H), 1.68 – 1.51 (m, 2H), 1.29 – 1.07 (m, 2H), 0.96 (d,  $J = 1.7$  Hz, 3H), 0.94 (d,  $J = 2.1$  Hz, 3H), 0.83 (d,  $J = 6.9$  Hz, 3H).  $^{13}\text{C}$  NMR (101 MHz, Chloroform- $d$ )  $\delta$  165.6, 152.4, 150.0, 137.3, 130.8, 129.7, 129.1, 128.8, 127.4, 121.8, 75.4, 47.3, 41.0, 34.3, 31.5, 26.6, 23.6, 22.1, 20.8, 16.5. HRMS (ESI)  $m/z$ : calcd for  $\text{C}_{20}\text{H}_{26}\text{NO}_2^+$   $[\text{M}+\text{H}]^+$ : 312.1958. found: 312.1960.

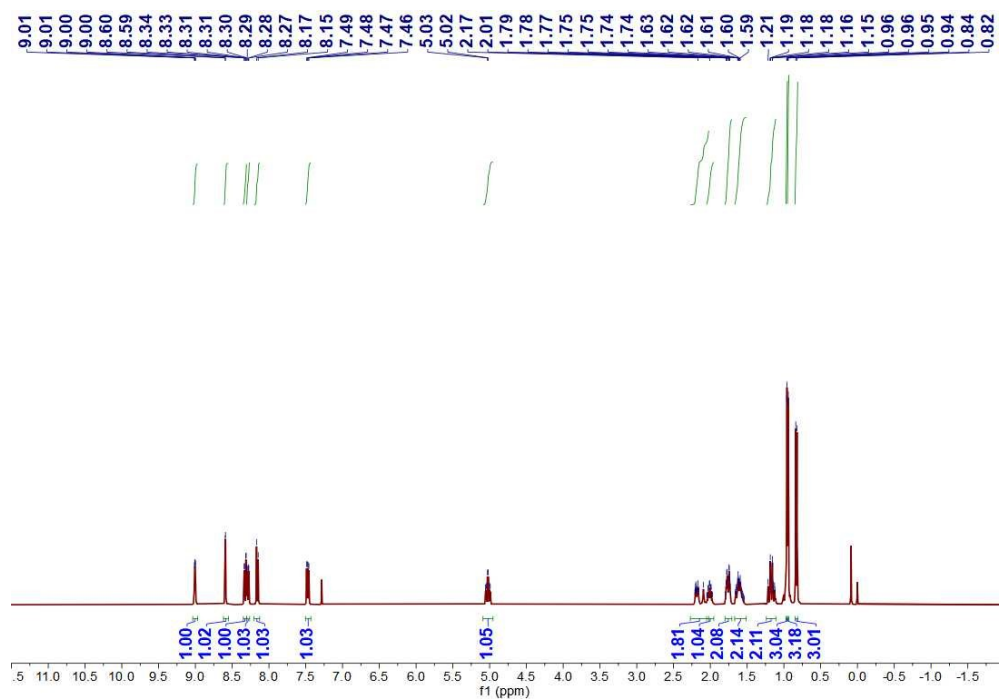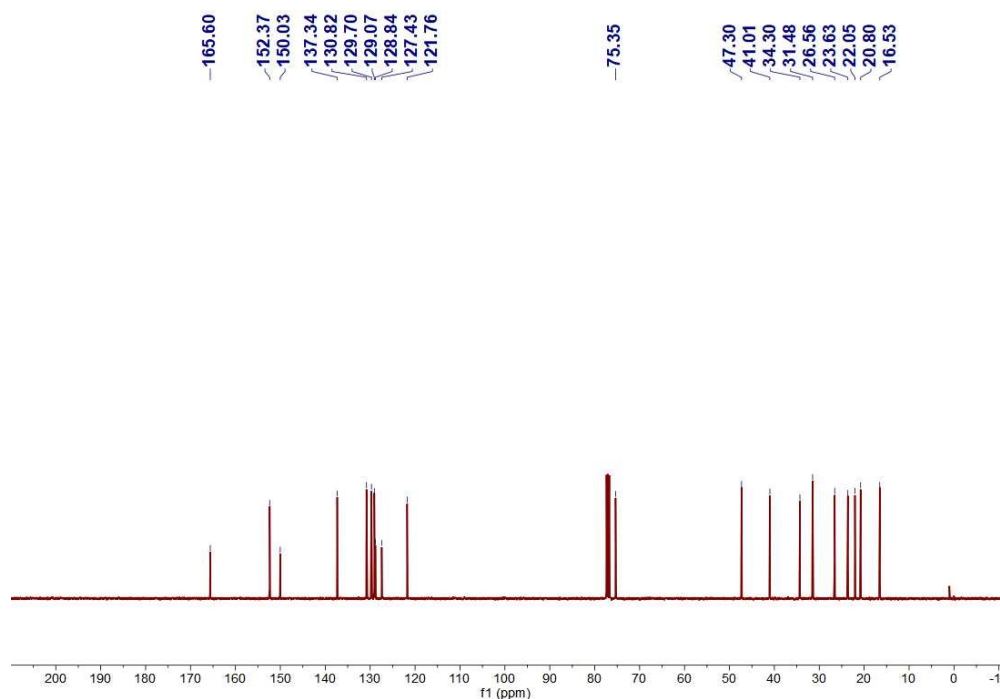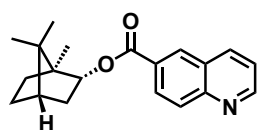

**(1S,2R,4S)-1,7,7-trimethylbicyclo[2.2.1]heptan-2-yl quinoline-6-carboxylate (S3):**

White solid, 91 % yield. <sup>1</sup>H NMR (400 MHz, Chloroform-*d*) δ 9.01 (dd, *J* = 4.3, 1.7 Hz, 1H), 8.59 (d, *J* = 1.9 Hz, 1H), 8.31 (ddd, *J* = 10.8, 8.8, 1.9 Hz, 2H), 8.16 (d, *J* = 8.8 Hz, 1H), 7.48 (dd, *J* = 8.3, 4.2 Hz, 1H), 5.20 (ddd, *J* = 9.9, 3.5, 2.1 Hz, 1H), 2.70 – 2.42 (m, 1H), 2.20 (ddd, *J* = 13.3, 9.4, 4.4 Hz, 1H), 1.92 – 1.72 (m, 2H), 1.46 (tdd, *J* = 11.9, 4.5, 2.2 Hz, 1H), 1.36 (ddd, *J* = 12.1, 9.4, 4.5 Hz, 1H), 1.18 (dd, *J* = 13.8, 3.5 Hz, 1H), 0.99 (s, 3H), 0.95 (s, 3H), 0.94 (s, 3H).

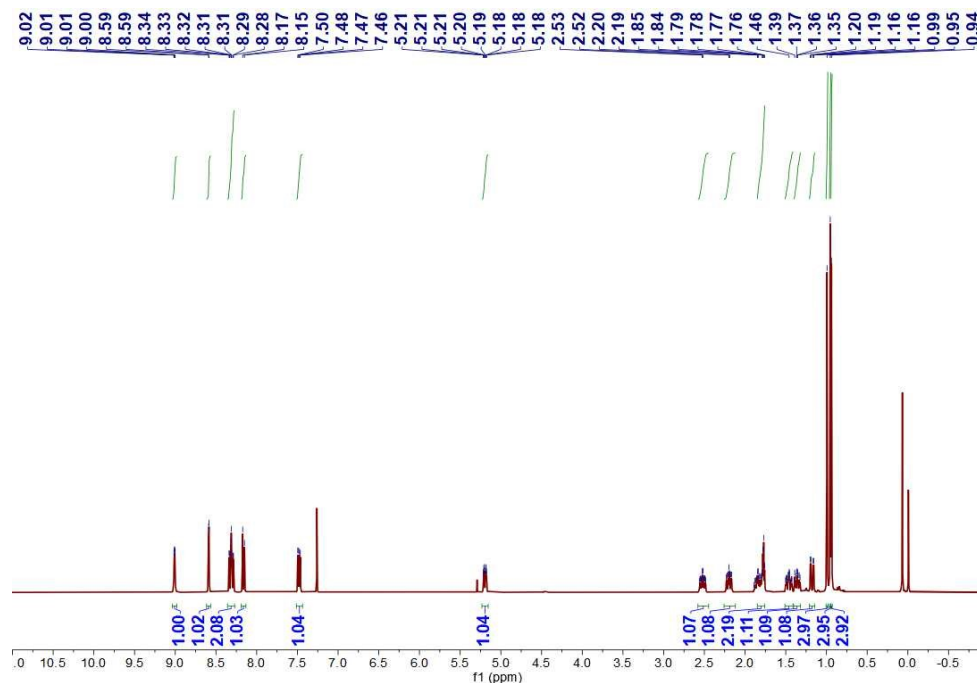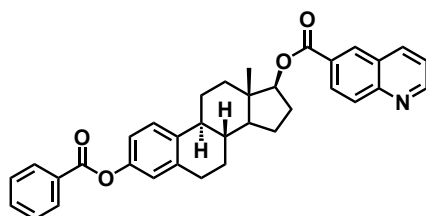

**(8R,9S,13S,17S)-3-(benzoyloxy)-13-methyl-7,8,9,11,12,13,14,15,16,17-decahydro - 6H - cyclopenta [a] phenanthrene - 17 - yl quinoline-6-carboxylate (S4):**

White solid, 95 % yield. <sup>1</sup>H NMR (400 MHz, Chloroform-*d*) δ 9.04 (dd, *J* = 4.2, 1.7 Hz, 1H), 8.62 (d, *J* = 1.8 Hz, 1H), 8.35 (dd, *J* = 8.8, 1.9 Hz, 1H), 8.31 (dd, *J* = 8.0, 1.5 Hz, 1H), 8.23 (s, 1H), 8.21 (d, *J* = 1.5 Hz, 1H), 8.19 (d, *J* = 8.8 Hz, 1H), 7.73 – 7.62 (m, 1H), 7.58 – 7.45 (m, 3H), 7.37 (d, *J* = 8.5 Hz, 1H), 7.01 (dd, *J* = 8.4, 2.6 Hz, 1H), 6.97 (d, *J* = 2.5 Hz, 1H), 5.06 (dd, *J* = 9.2, 7.6 Hz, 1H), 3.02 – 2.88 (m, 2H), 2.53 – 2.28 (m, 3H), 2.12 – 2.03 (m, 1H), 1.98 (ddd, *J* = 9.8, 5.2, 2.7 Hz, 1H), 1.91 – 1.69 (m, 2H), 1.67 – 1.36 (m, 6H), 1.08 (s, 3H).

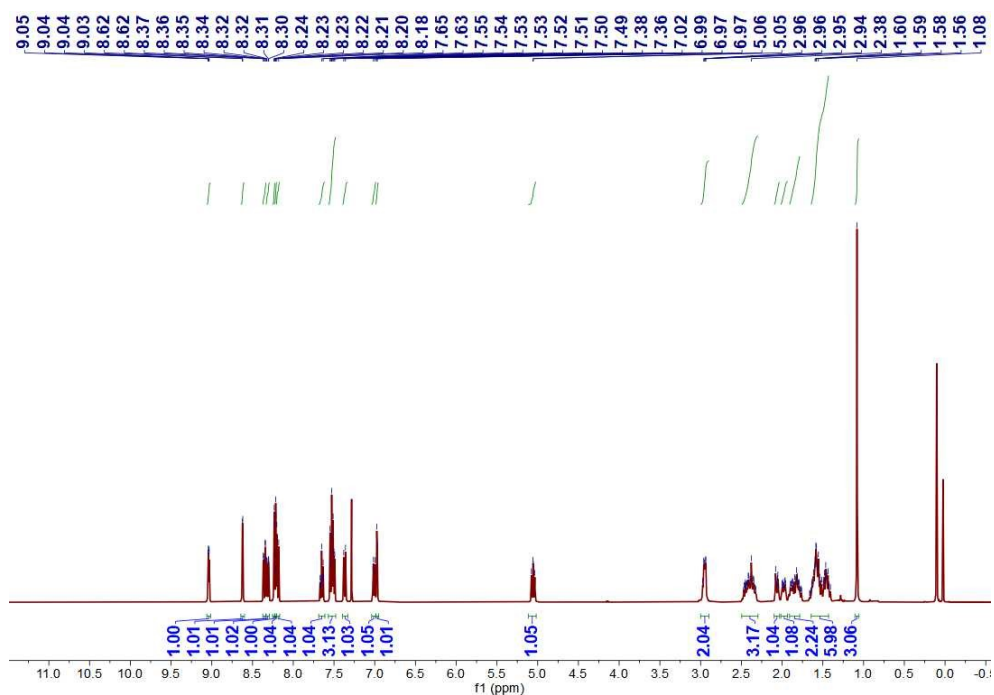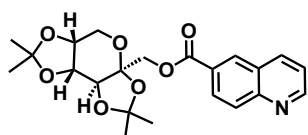

**((3a*S*,5a*R*,8a*R*,8b*S*)-2,2,7,7-tetramethyltetrahydro-3a*H*-bis([1,3]dioxolo)[4,5-*b*:4',5'-*d*]pyran-3a-yl)methyl quinoline-6-carboxylate (**S5**):** White solid, 88 % yield. <sup>1</sup>H NMR (400 MHz, Chloroform-*d*) δ 9.00 (dd, *J* = 4.3, 1.8 Hz, 1H), 8.63 (d, *J* = 1.9 Hz, 1H), 8.32 (dd, *J* = 8.8, 1.9 Hz, 1H), 8.25 (dd, *J* = 8.3, 1.8 Hz, 1H), 8.14 (d, *J* = 8.8 Hz, 1H), 7.47 (dd, *J* = 8.3, 4.2 Hz, 1H), 4.76 (d, *J* = 11.7 Hz, 1H), 4.65 (dd, *J* = 7.9, 2.6 Hz, 1H), 4.50 (d, *J* = 2.6 Hz, 1H), 4.39 (d, *J* = 11.7 Hz, 1H), 4.26 (dd, *J* = 7.9, 1.7 Hz, 1H), 3.96 (dd, *J* = 13.0, 1.9 Hz, 1H), 3.81 (d, *J* = 13.0 Hz, 1H), 1.55 (s, 3H), 1.45 (s, 3H), 1.38 (s, 3H), 1.34 (s, 3H). <sup>13</sup>C NMR (101 MHz, Chloroform-*d*) δ 165.5, 152.6, 150.1, 137.4, 131.3, 129.9, 129.0, 127.9, 127.4, 121.9, 109.2, 108.9, 101.7, 70.8, 70.7, 70.1, 65.8, 61.4, 26.5, 25.9, 25.5, 24.0. HRMS (ESI) *m/z*: calcd for C<sub>22</sub>H<sub>26</sub>NO<sub>7</sub><sup>+</sup> [M+H]<sup>+</sup>: 416.1704. found: 416.1708.

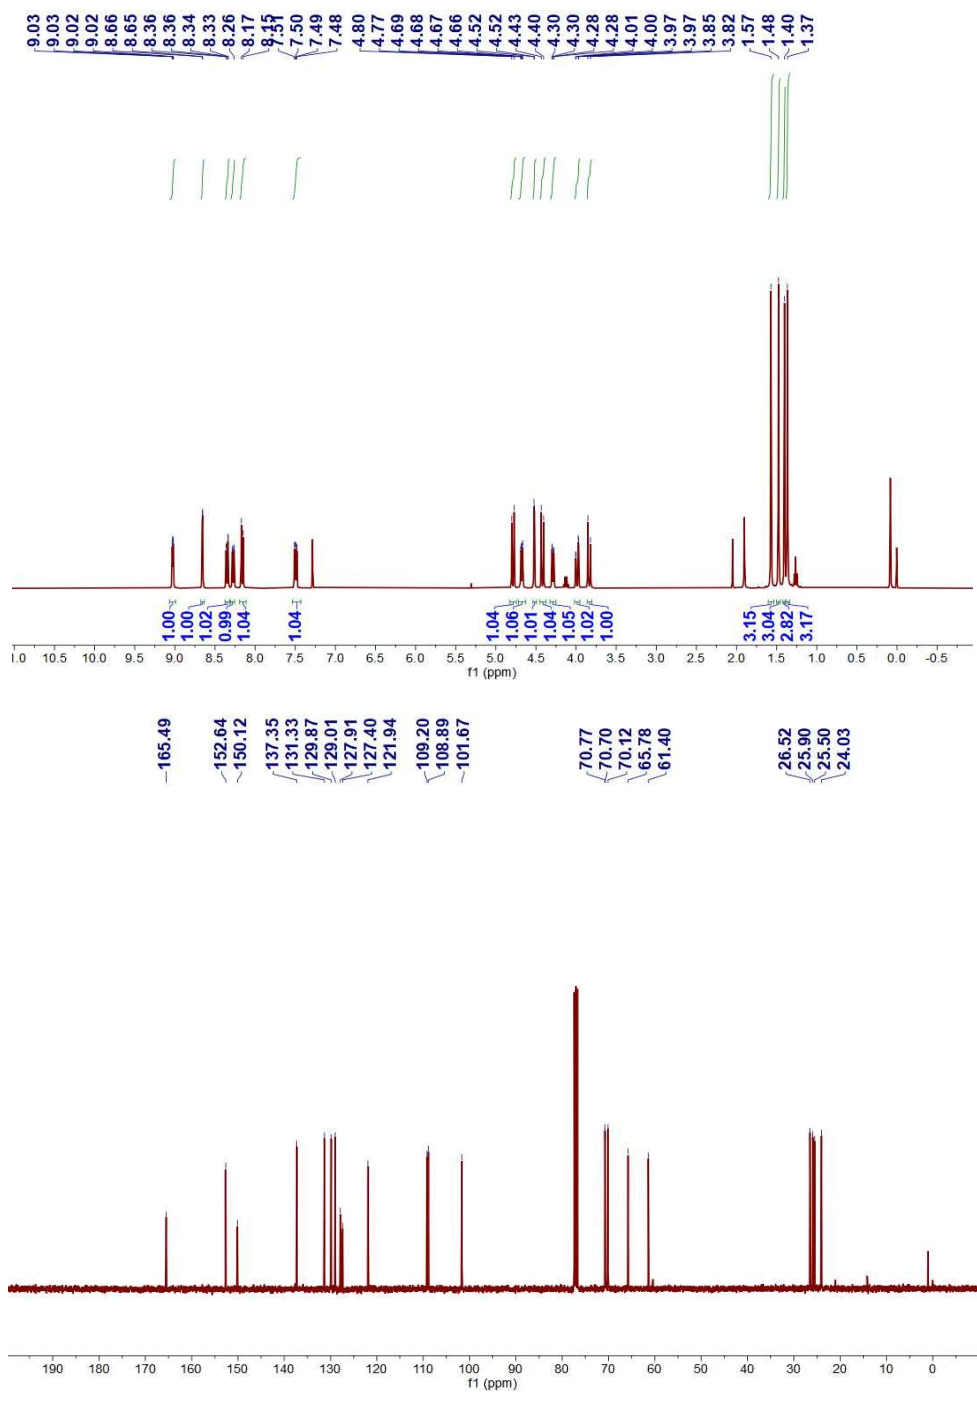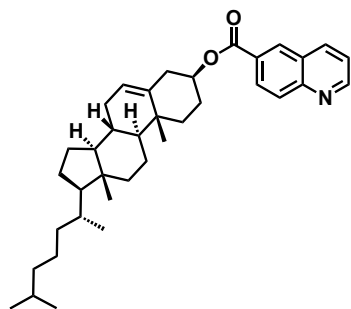

**(3S,8S,9S,10R,13R,14S,17R)-10,13-dimethyl-17-((R)-6-methylheptan-2-yl)-2,3,4,7,8,9,10,11,12,13,14,15,16,17-tetradecahydro-1H-**



**cyclopenta[a]phenanthren-3-yl quinoline-6-carboxylate (S6)** : White solid, 93 % yield.

$^1\text{H}$  NMR (400 MHz, Chloroform-*d*)  $\delta$  8.97 (dd,  $J = 4.3, 2.0$  Hz, 1H), 8.56 (d,  $J = 2.0$  Hz, 1H), 8.29 (dd,  $J = 8.9, 1.8$  Hz, 1H), 8.24 (dd,  $J = 8.4, 2.0$  Hz, 1H), 8.12 (d,  $J = 8.9$  Hz, 1H), 7.52 – 7.38 (m, 1H), 5.42 (d,  $J = 2.7$  Hz, 1H), 4.97 – 4.83 (m, 1H), 2.50 (d,  $J = 8.2$  Hz, 2H), 2.18 – 1.71 (m, 7H), 1.62 – 1.08 (m, 18H), 1.03 – 0.82 (m, 13H), 0.67 (s, 3H).  $^{13}\text{C}$  NMR (101 MHz, Chloroform-*d*)  $\delta$  165.5, 152.4, 150.0, 139.5, 137.3, 130.8, 129.7, 129.1, 128.8, 127.4, 122.9, 121.8, 75.1, 56.7, 56.2, 50.1, 42.3, 39.8, 39.5, 38.3, 37.1, 36.7, 36.2, 35.8, 31.95, 31.9, 28.3, 28.0, 27.9, 24.3, 23.9, 22.8, 22.6, 21.1, 19.4, 18.7, 11.9. HRMS (ESI)  $m/z$ : calcd for  $\text{C}_{37}\text{H}_{52}\text{NO}_2^+$   $[\text{M}+\text{H}]^+$ : 542.3993. found: 542.3994.

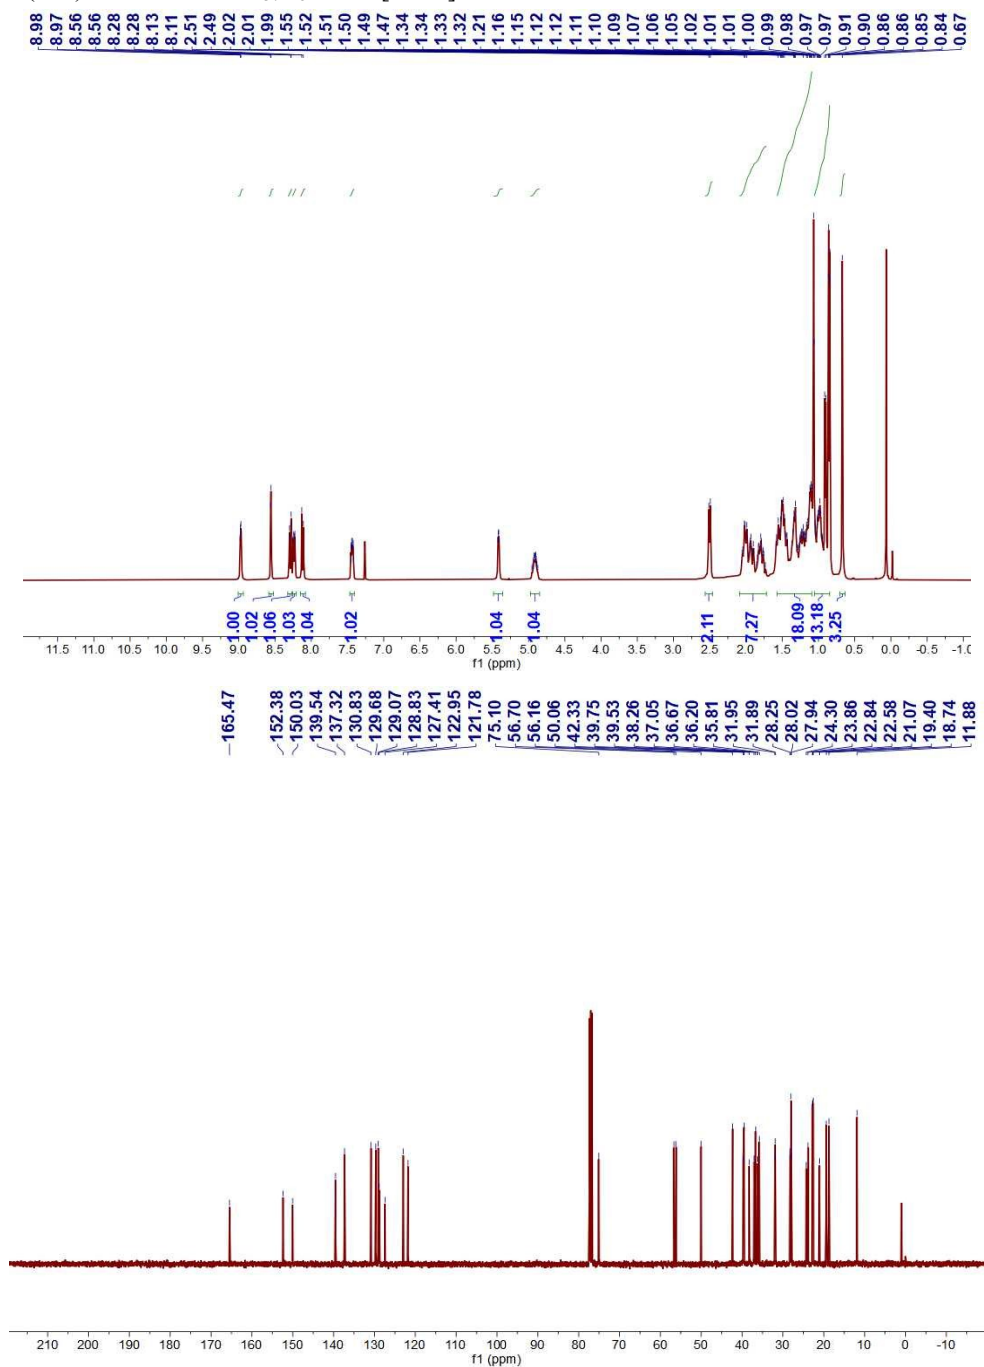

### 2.3 Synthesis of quinoline 1-oxide 1c. [2]

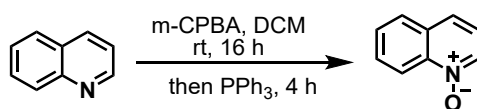

Quinoline (3 mmol), m-CPBA (1 equiv.) and DCM (0.2 M) were introduced in a flask (50 mL). The reaction was allowed to stir for 16 hours at room temperature. PPh<sub>3</sub> (0.5 equiv.) was then added to reduce any unreacted peracid and the mixture was stirred for an additional 4 h. After evaporation, the crude was purified by silica gel column chromatography affording the desired product **1c** in 90% yield.

#### 2.4 Synthesis of benzoyl(quinolin-1-ium-1-yl)amide **1b**.<sup>[3]</sup>

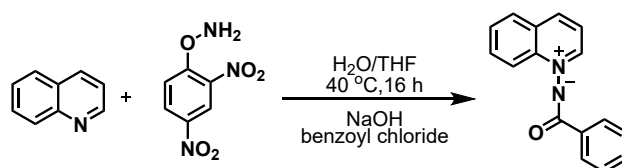

Quinoline (3 mmol) and O-(2,4-dinitrophenyl)hydroxylamine (3.3 mmol) were added to H<sub>2</sub>O/THF (1:1 mixture, 2.5 mL). The reaction flask was sealed with a septum, and the resulting suspension was stirred at 40 °C for 16 h. During this period, the reaction mixture turned dark red. The reaction was poured into aqueous NaOH (2.5 N, 15 mL) at room temperature and stirred for 5 min, and then benzoyl chloride (4.6 mmol) was added in one portion. After 5 h, the reaction was diluted with H<sub>2</sub>O (12.5 mL) and extracted with CHCl<sub>3</sub> (3 × 25 mL). The combined organic phases were washed with NaOH (2.5 N, 12.5 mL). The organic phase was dried over Na<sub>2</sub>SO<sub>4</sub>, filtered, and concentrated under reduced pressure affording the **1b**.

#### 2.5 General procedure for the Synthesis of **3a-3r** and **5a-10a**.

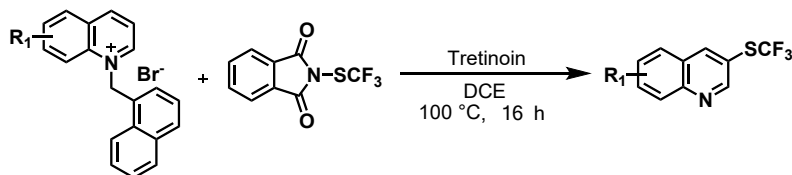

An oven-dried 25 mL Schlenk tube equipped with magnetic stirring bar were charged with corresponding *N*-naphthylmethyl heteroarenium salt (0.10 mmol, 1.0 equiv.), *N*-(trifluoromethylthio)phthalimide (Phth-SCF<sub>3</sub>) (0.20 mmol, 2.0 equiv.), Tretinoin (0.05 mmol, 0.5 equiv.) and 1,2-dichloroethane (2 mL) in the air. The resulting solution was stirred at 100 °C (heated by heating plate magnetic stirrer) for 16 h. After cooling to room temperature, the mixture was diluted with dichloromethane and filtered through a short pad of celite, the volatiles were removed under vacuum and the residue was purified by preparative thin layer chromatography (silica gel, petroleum ether/ethyl acetate 20:1 to 10:1) to give pure product.

## 2.6 General procedure for the Synthesis of 4a-4j and 5b-10b.

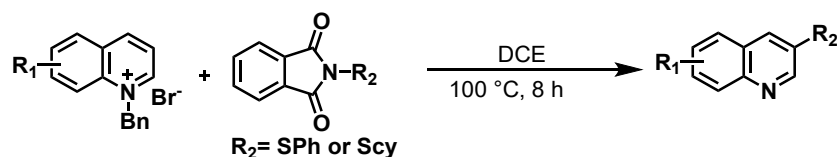

An oven-dried 25 mL Schlenk tube equipped with magnetic stirring bar were charged with corresponding *N*-naphthylmethyl heteroarenium salt (0.10 mmol, 1.0 equiv.), *N*-(Phenylthio) phthalimide (Phth-SPh) or *N*-(Cyclohexylthio) phthalimide (Phth-Scy) (0.20 mmol, 2.0 equiv.) and 1,2-dichloroethane (2 mL) in the air. The resulting solution was stirred at 100 °C (heated by heating plate magnetic stirrer) for 8 h. After cooling to room temperature, the mixture was diluted with dichloromethane and filtered through a short pad of celite, the volatiles were removed under vacuum and the residue was purified by preparative thin layer chromatography (silica gel, petroleum ether/ethyl acetate 20:1 to 10:1) to give pure product.

## 2.7 Optimization Results of the Reaction Conditions for the synthesis of product

### 3a.

Table S1. Optimization of reaction condition<sup>[a, b]</sup>

| Entry | Additive               | Solvent | Temperature (°C) | Time (h) | 3a (%) |
|-------|------------------------|---------|------------------|----------|--------|
| 1     | -                      | DCE     | 100              | 16       | 40     |
| 2     | BA                     | DCE     | 100              | 16       | 47     |
| 3     | 4'-Bu-BA               | DCE     | 100              | 16       | 35     |
| 4     | 4-Me <sub>2</sub> N-BA | DCE     | 100              | 16       | 57     |
| 5     | 2-CH <sub>3</sub> -BA  | DCE     | 100              | 16       | 47     |
| 6     | 3,5-Ditert-BA          | DCE     | 100              | 16       | 41     |
| 7     | 3,4,5-triethoxy-BA     | DCE     | 100              | 16       | 48     |
| 8     | 4-NO <sub>2</sub> -BA  | DCE     | 100              | 16       | 39     |
| 9     | 4-F-BA                 | DCE     | 100              | 16       | 42     |
| 10    | 2-CN-BA                | DCE     | 100              | 16       | 34     |
| 11    | Boc-D-proline          | DCE     | 100              | 16       | 58     |
| 12    | Retinoic acid          | DCE     | 100              | 16       | 63     |
| 13    | Citric acid            | DCE     | 100              | 16       | 40     |

|    |                    |     |     |    |      |
|----|--------------------|-----|-----|----|------|
| 14 | Piperonylic acid   | DCE | 100 | 16 | 40   |
| 15 | Abietic acid       | DCE | 100 | 16 | 33   |
| 16 | Sulindac           | DCE | 100 | 16 | 47   |
| 17 | Tungstic acid      | DCE | 100 | 16 | 58   |
| 18 | Nicotinic acid     | DCE | 100 | 16 | 44   |
| 19 | KO <sup>t</sup> Bu | DCE | 100 | 16 | n.d. |

[a] Reaction conditions: **1a** (0.1 mmol), **2a** (0.2 mmol), additive (0.05 mmol), solvent (2.0 mL), [b] yields were determined by <sup>19</sup>F-NMR analysis using benzotrifluoride as an internal standard. “-” stands for no addition. “BA” stands for “benzoic”. “n.d.” stands for no detection.

**Table S2. Optimization of reaction condition<sup>[a, b]</sup>**

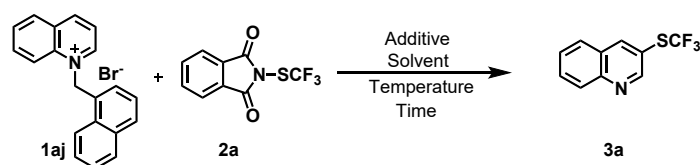

| Entry | Additive               | Solvent | Temperature (°C) | Time (h) | <b>3a</b> (%) |
|-------|------------------------|---------|------------------|----------|---------------|
| 1     | -                      | DCE     | 100              | 16       | 53            |
| 2     | BA                     | DCE     | 100              | 16       | 54            |
| 3     | 4- <sup>t</sup> Bu-BA  | DCE     | 100              | 16       | 30            |
| 4     | 4-Me <sub>2</sub> N-BA | DCE     | 100              | 16       | 36            |
| 5     | 2-CH <sub>3</sub> -BA  | DCE     | 100              | 16       | 40            |
| 6     | 3,5-Ditert-BA          | DCE     | 100              | 16       | 45            |
| 7     | 3,4,5-triethoxy-BA     | DCE     | 100              | 16       | 45            |
| 8     | 4-NO <sub>2</sub> -BA  | DCE     | 100              | 16       | 40            |
| 9     | 4-F-BA                 | DCE     | 100              | 16       | 43            |
| 10    | 2-CN-BA                | DCE     | 100              | 16       | 35            |
| 11    | Boc-D-proline          | DCE     | 100              | 16       | 68            |
| 12    | Retinoic acid          | DCE     | 100              | 16       | 75            |
| 13    | Citric acid            | DCE     | 100              | 16       | 50            |
| 14    | Piperonylic acid       | DCE     | 100              | 16       | 50            |
| 15    | Abietic acid           | DCE     | 100              | 16       | 35            |
| 16    | Sulindac               | DCE     | 100              | 16       | 50            |
| 17    | Tungstic acid          | DCE     | 100              | 16       | 56            |
| 18    | Nicotinic acid         | DCE     | 100              | 16       | 40            |
| 19    | KO <sup>t</sup> Bu     | DCE     | 100              | 16       | n.d.          |

[a] Reaction conditions: **1aj** (0.1 mmol), **2a** (0.2 mmol), additive (0.05 mmol), solvent (2.0 mL), [b] yields were determined by <sup>19</sup>F-NMR analysis using benzotrifluoride as an internal standard. “-” stands for no addition. “BA” stands for “benzoic”. “n.d.” stands for no detection.

**Table S3. Optimization of reaction condition<sup>[a, b]</sup>**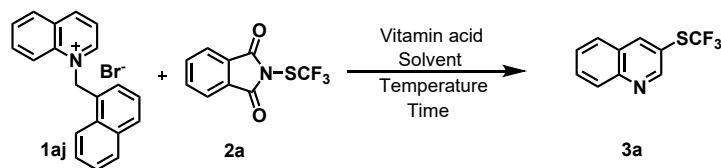

| Entry | Additive                   | Solvent | Temperature (°C) | Time (h) | <b>3a</b> (%)   |
|-------|----------------------------|---------|------------------|----------|-----------------|
| 1     | Retinoic acid              | DCE     | 80               | 16       | 50              |
| 2     | Retinoic acid              | DCE     | 60               | 16       | 30              |
| 3     | Retinoic acid              | DCE     | 120              | 16       | 70              |
| 4     | Retinoic acid              | DCE     | 100              | 14       | 72              |
| 5     | Retinoic acid              | DCE     | 100              | 12       | 55              |
| 6     | Retinoic acid              | DCE     | 100              | 10       | 45              |
| 7     | Retinoic acid              | DCE     | 100              | 14       | 45              |
| 8     | Retinoic acid              | DCE     | 100              | 18       | 74              |
| 9     | Retinoic acid              | DCE     | 100              | 20       | 75              |
| 10    | Retinoic acid              | DCE     | 100              | 22       | 73              |
| 11    | Retinoic acid              | DBE     | 100              | 16       | trace           |
| 12    | Retinoic acid              | DCE     | 100              | 16       | 55 <sup>c</sup> |
| 13    | Retinoic acid              | DCE     | 100              | 16       | 50 <sup>d</sup> |
| 14    | Retinoic acid <sup>e</sup> | DCE     | 100              | 16       | 51              |
| 15    | Retinoic acid <sup>f</sup> | DCE     | 100              | 16       | 50              |
| 16    | Retinoic acid <sup>g</sup> | DCE     | 100              | 16       | 70              |
| 17    | Retinoic acid <sup>h</sup> | DCE     | 100              | 16       | 72              |

[a] Reaction conditions: **1aj** (0.1 mmol), **2a** (0.2 mmol), retinoic acid (0.05 mmol), solvent (2.0 mL), [b] yields were determined by <sup>19</sup>F-NMR analysis using benzotrifluoride as an internal standard. [c] Reaction conditions: **1aj** (0.1 mmol), **2a** (0.2 mmol), retinoic acid (0.05 mmol), DCE (1.0 mL). [d] Reaction conditions: **1aj** (0.1 mmol), **2a** (0.2 mmol), retinoic acid (0.05 mmol), DCE (3.0 mL). [e] Retinoic acid (0.02 mmol). [f] Retinoic acid (0.04 mmol). [g] Retinoic acid (0.08 mmol). [h] Retinoic acid (0.1 mmol). “BA” stands for “benzoic”. Reactions cannot proceed using any of these solvents, including: DMA, Acetonitrile, Acetone, Toluene, CH<sub>3</sub>OH, EtOH, CH<sub>2</sub>Cl, MTBA, Diglyme, 1,4-dioxane, THF.

## 2.8 Optimization Results of the Reaction Conditions for the synthesis of product

### 4a.

**Table S4. Optimization of reaction condition<sup>[a, b]</sup>**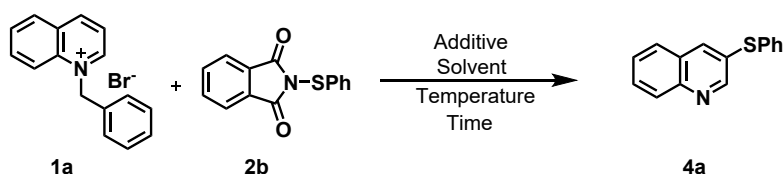

| Entry | Additive | Solvent | Temperature (°C) | Time (h) | <b>4a</b> (%) |
|-------|----------|---------|------------------|----------|---------------|
| 1     | -        | DCE     | 100              | 16       | 94            |
| 2     | BA       | DCE     | 100              | 16       | 88            |
| 3     | -        | DCE     | 100              | 14       | 93            |
| 4     | -        | DCE     | 100              | 12       | 96            |
| 5     | -        | DCE     | 100              | 10       | 95            |
| 6     | -        | DCE     | 100              | 8        | 95            |
| 7     | -        | DCE     | 100              | 6        | 80            |
| 8     | -        | DCE     | 100              | 4        | 60            |
| 9     | -        | DCE     | 100              | 16       | 42            |
| 10    | -        | DCE     | 80               | 8        | 82            |
| 11    | -        | DMA     | 100              | 8        | n.d.          |

[a] Reaction conditions: **1a** (0.1 mmol), **2b** (0.2 mmol), additive (0.05 mmol), solvent (2.0 mL), [b] Isolated yields. “-” stands for no addition, “BA” stands for “benzoic”. “n.d.” stands for no detection.

## 2.9 Useful Transformation and Scale-up Reaction

### 2.9.1 Synthesis of **4aa** and **4ab**.

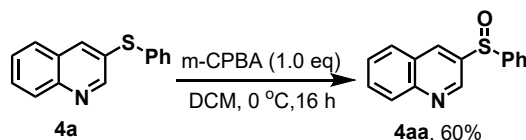

3-(Phenylthio)quinoline **4a** (0.5 mmol, 118.5 mg), m-chloroperoxybenzoic acid (m-CPBA) (1.0 eq, 86.28 mg), and dichloromethane (2.5 mL) were introduced in a Schlenk tube, successively. The resulting mixture was then stirred at 0 °C for 16 h. Then the solvent was removed, the mixture was diluted with dichloromethane and filtered through a short pad of celite, the volatiles were removed under vacuum and the residue was purified by column chromatography (silica gel, petroleum ether/ethyl) to give pure product (Yield: 75.9 mg, 60%).

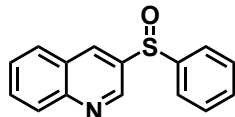

**3-(phenylsulfinyl)quinoline (4aa):** <sup>1</sup>H NMR (400 MHz, Chloroform-*d*) δ 8.89 (s, 1H), 8.62 (d, *J* = 2.1 Hz, 1H), 8.14 (d, *J* = 8.5 Hz, 1H), 7.94 (dd, *J* = 8.2, 1.5 Hz, 1H), 7.81 (ddd, *J* = 8.5, 6.9, 1.4 Hz, 1H), 7.76 – 7.70 (m, 2H), 7.64 (dd, *J* = 8.1, 7.0 Hz, 1H), 7.56 – 7.44 (m, 3H).

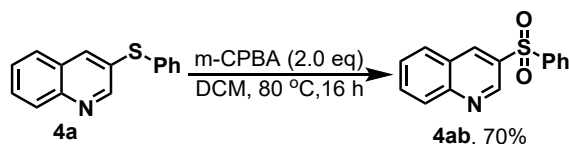

3-(Phenylthio)quinoline **4a** (0.5 mmol, 118.5 mg), *m*-chloroperoxybenzoic acid (*m*-CPBA) (2.0 eq, 172.6 mg), and dichloromethane (2.5 mL) were introduced in a Schlenk tube, successively. The resulting mixture was then stirred at 80 °C for 16 h. Then the solvent was removed, the mixture was diluted with dichloromethane and filtered through a short pad of celite, the volatiles were removed under vacuum and the residue was purified by column chromatography (silica gel, petroleum ether/ethyl) to give pure product (Yield: 94.2 mg, 70%).

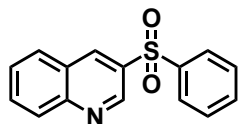

**3-(phenylsulfonyl)quinoline (4ab):** <sup>1</sup>H NMR (400 MHz, Chloroform-*d*) δ 9.27 (d, *J* = 2.3 Hz, 1H), 8.82 (d, *J* = 2.3 Hz, 1H), 8.16 (d, *J* = 8.5 Hz, 1H), 8.09 – 8.01 (m, 2H), 7.97 (dd, *J* = 8.2, 1.5 Hz, 1H), 7.88 (ddd, *J* = 8.4, 6.9, 1.5 Hz, 1H), 7.68 (ddd, *J* = 8.1, 6.9, 1.2 Hz, 1H), 7.64 – 7.57 (m, 1H), 7.54 (t, *J* = 7.4 Hz, 2H).

### 2.9.2 One-pot gram-scale synthesis of compound 3a

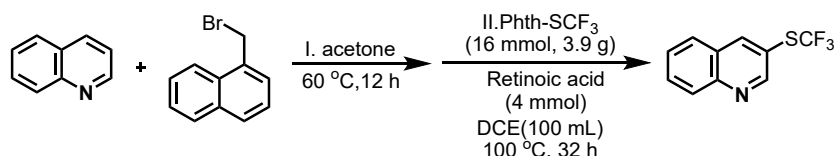

Quinoline (8 mmol, 1.03 g), 1-(bromomethyl) naphthalene (10 mmol, 1.76 g), and toluene (30 mL) were introduced in a Schlenk tube, successively. The resulting mixture was then stirred at 60 °C for 12 h. Then the solvent was removed, and to the reaction was added Phth-SCF<sub>3</sub> (16 mmol, 3.9 g), DCE (160 mL). The reaction was performed at 100 °C for 32 h. After cooling to room temperature, the mixture was diluted with dichloromethane and filtered through a short pad of celite, the volatiles were removed under vacuum and the residue was purified by column chromatography (silica gel, petroleum ether/ethyl 10:1) to give pure product (Yield: 1.25 g, 68%).

### 2.9.3 One-pot gram-scale synthesis of compound 4a

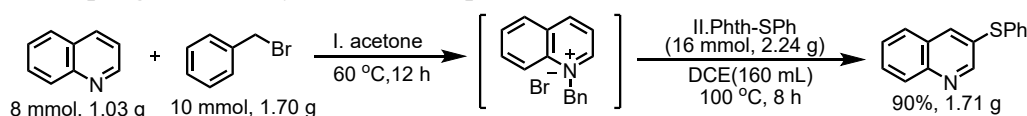

Quinoline (8 mmol, 1.03 g), benzyl bromide (10 mmol, 1.70 g), and acetone (30 mL) were introduced in a Schlenk tube, successively. The resulting mixture was then stirred at 60 °C for 12 h. Then the solvent was removed, and to the reaction were added Phth-SPh (16 mmol, 2.24 g), DCE (160 mL). The reaction was performed at 100 °C for 8 h. After cooling to room temperature, the mixture was diluted with dichloromethane and filtered through a short pad of celite, the volatiles were removed under vacuum and the residue was purified by column chromatography (silica gel, petroleum ether/ethyl 10:1) to give pure product (Yield: 1.71 g, 90%).

## 2.10. Mechanism studies

### 2.10.1 Radical trapping experiment.

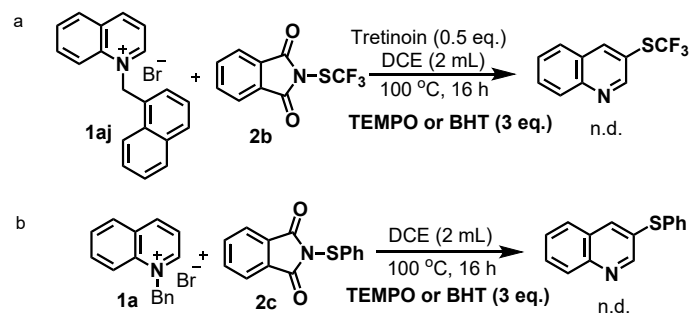

a: The 25 mL Schlenk tube equipped with magnetic stirring bar was charged with **1aj** (0.1 mmol, 34.9 mg), **2b** (0.2 mmol, 49.4 mg), Tretinoin (0.05 mmol), 1,2-Dichloroethane (DCE, 2 mL). Then, 3 times the equivalent of TEMPO (0.3 mmol) or BHT (0.3 mmol) were added to Schlenk tube respectively, each tube was heated at 100°C for 16 h.

b: The 25 mL Schlenk tube equipped with magnetic stirring bar was charged with **1a** (0.1mmol, 30.0 mg), **2c** (0.2 mmol, 50.1 mg), Tretinoin (0.05 mmol), 1,2-Dichloroethane (DCE, 2 mL). Then, 3 times the equivalent of TEMPO (0.3 mmol) or BHT (0.3 mmol) were added to Schlenk tube respectively, each tube was heated at 100°C for 16 h.

### 2.10.2 Proof of radical pathway.

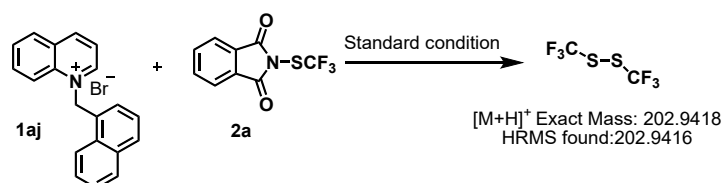

**1aj** (0.1 mmol), **2a** (0.2 mmol), Retinoic acid (0.05 mmol) were added into 2 mL DCE. The resulting solution was stirred at 100 °C under air for 16 h. Then, the reaction mixture was detected by ESI-HRMS.

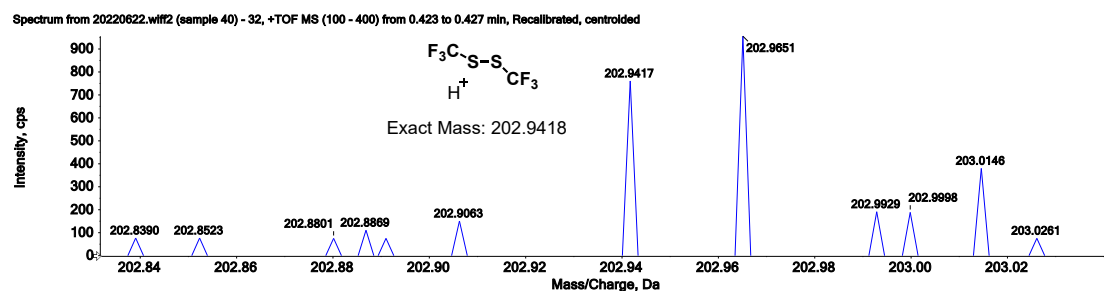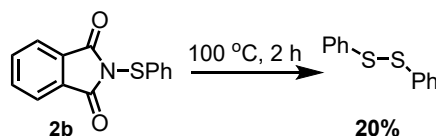

**2b** (0.2 mmol) was added into 2 mL DCE. The resulting solution was stirred at 100 °C under air for 2 h. Then, the reaction mixture was detected by GC-MS.



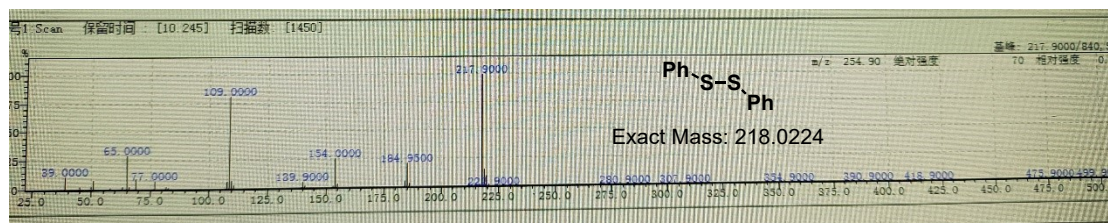

### 2.10.3 Optimization Results of the synthesis of product 4a by diaryldisulfide.

Table S5. Optimization of reaction condition<sup>[a,b]</sup>

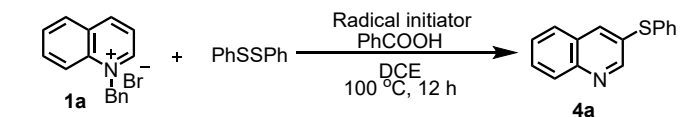

| Entry | Radical initiator                                    | 4a (%) |
|-------|------------------------------------------------------|--------|
| 1     | NBS (1 eq)                                           | 40     |
| 2     | NCS (1 eq)                                           | 55     |
| 3     | NIS (1 eq)                                           | 50     |
| 4     | Phth-Br (1 eq)                                       | 80     |
| 5     | Phth-Cl (1 eq)                                       | 60     |
| 6     | Phth-I (1 eq)                                        | 55     |
| 7     | Na <sub>2</sub> S <sub>2</sub> O <sub>4</sub> (1 eq) | 10     |
| 8     | TBHP (1 eq)                                          | 12     |
| 9     | PhI(OAc) <sub>2</sub> (1 eq)                         | 15     |
| 10    | -                                                    | n.d.   |
| 11    | Phth-Br (0.5 eq)                                     | 48     |
| 12    | Phth-Br (0.2 eq)                                     | 35     |

[a] Reaction conditions: **1a** (0.1 mmol), diphenyl disulfide (0.2 mmol), BA (0.05 mmol), DBE (2.0 mL), Radical initiator (0.1 mmol). [b] isolated yields. “-” stands for no addition. “n.d.” stands for no detection.

### 2.10.4 Mechanism research for synthesis of product 4a by diaryldisulfide.

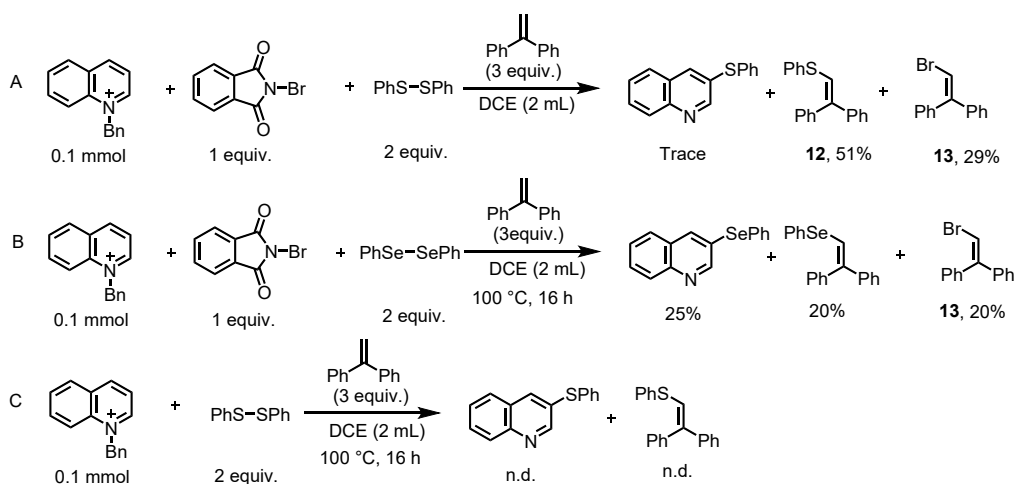

When 3 equiv. of radical scavenger ethene-1,1-diyldibenzene were added to a reaction mixture, the yield of desired product **4a** decreased sharply from 80% to trace, along with 51% product (2,2-diphenylvinyl)(phenyl)sulfane and 29% (2-bromoethene-1,1-diyldibenzene which originated from the addition of a thiobenzene radical and bromine radical to the scavenger. The corresponding (2,2-diphenylvinyl)(phenyl)selane was also isolated in 20% yield in the phenylselenylation reaction, while the production of 3-(phenylselenanyl)quinoline was decreased from 95% to 20%. Control Experiment C shows that without the addition of the radical initiator Phth-Br, the thiobenzene radical cannot be generated and the desired reaction does not occur. The experimental results show that both thiobenzene radicals and selenobenzene radicals are induced by Phth-Br.

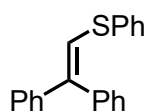

**(2,2-diphenylvinyl)(phenyl)sulfane (12)** :  $^1\text{H NMR}$  (400 MHz, Chloroform-*d*)  $\delta$  7.52 – 7.41 (m, 4H), 7.41 – 7.32 (m, 5H), 7.28 (m, 6H), 6.89 (s, 1H).

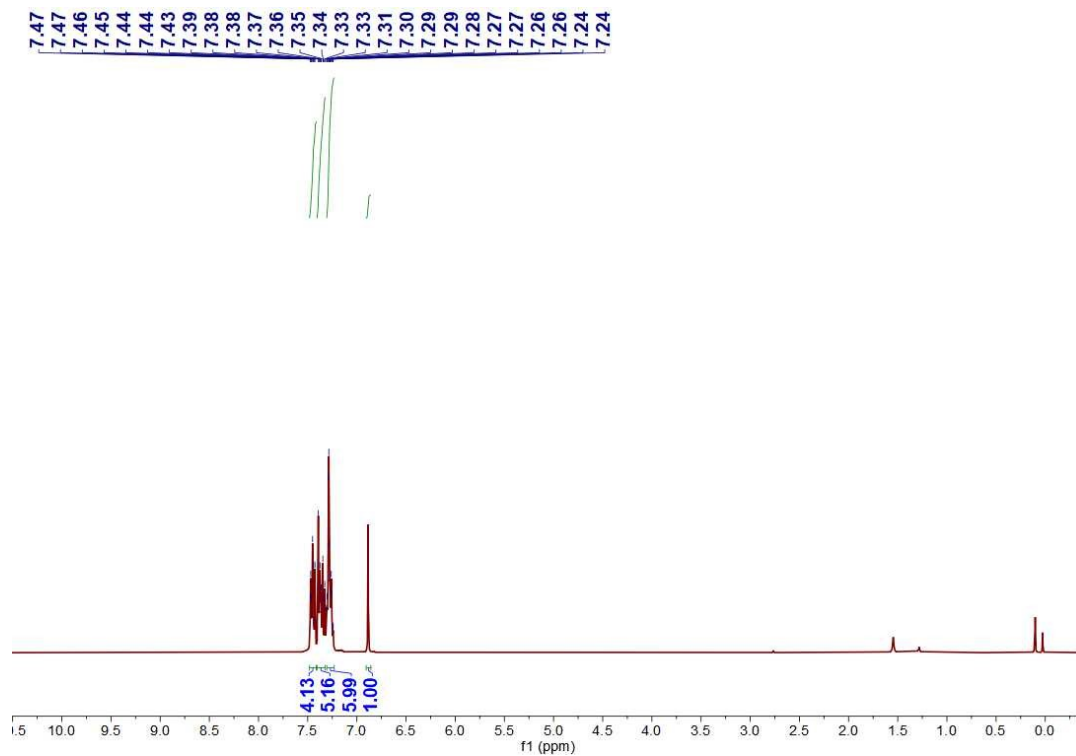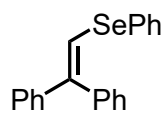

**(2,2-diphenylvinyl)(phenyl)sulfane (13):**  $^1\text{H NMR}$  (400 MHz, Chloroform-*d*)  $\delta$  7.59 (dd,  $J = 7.5, 2.1$  Hz, 2H), 7.47 – 7.37 (m, 4H), 7.37 – 7.23 (m, 9H), 7.13 (s, 1H).

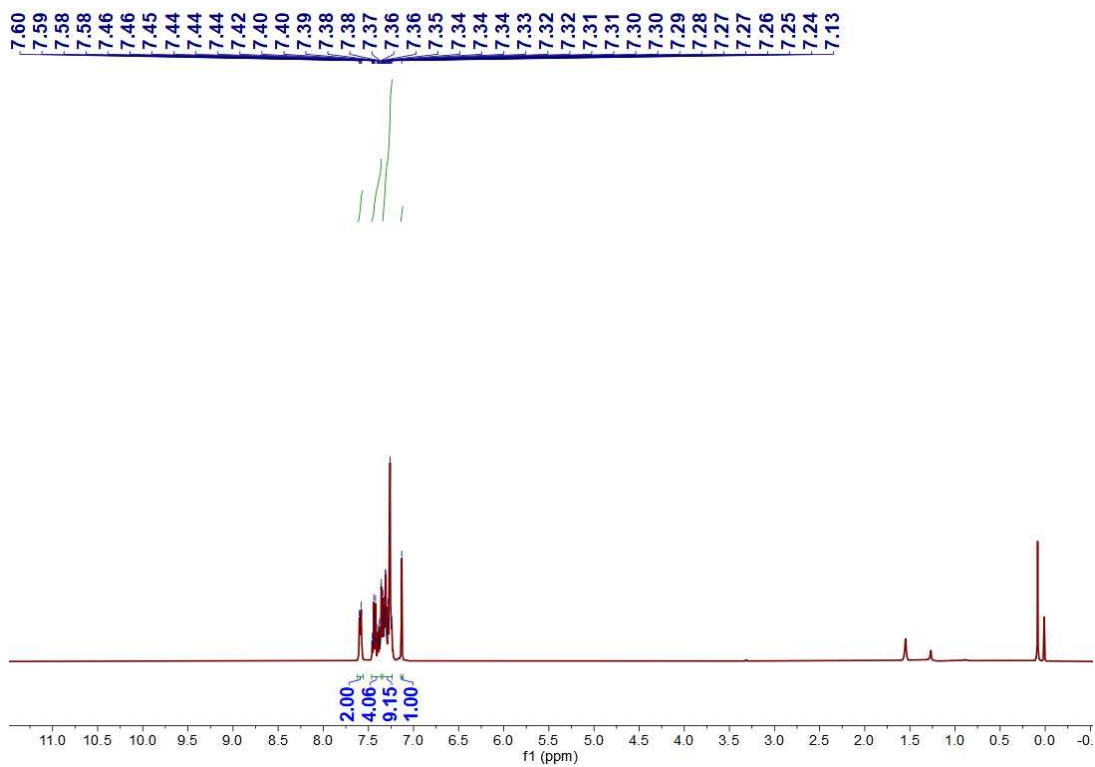

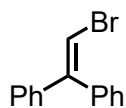

**(2-bromoethene-1,1-diyl)dibenzene (13)** :  $^1\text{H NMR}$  (400 MHz, Chloroform-*d*)  $\delta$  7.47 – 7.28

(m, 8H), 7.23 (m, 2H), 6.79 (s, 1H).

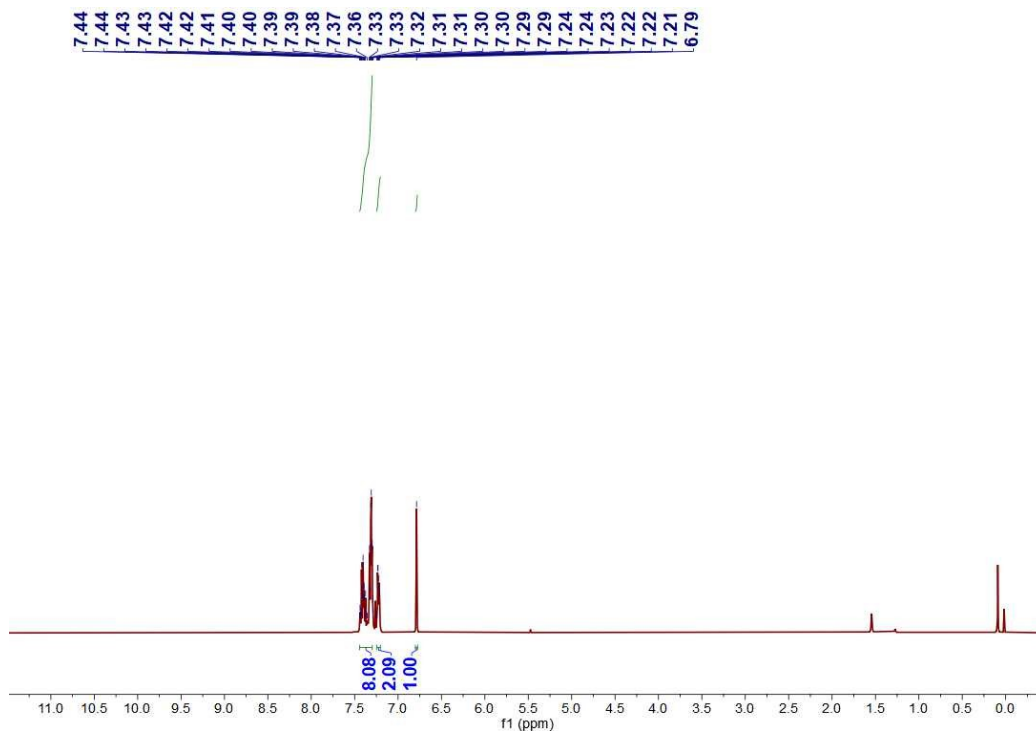

### 2.10.5 Radical Trapping.

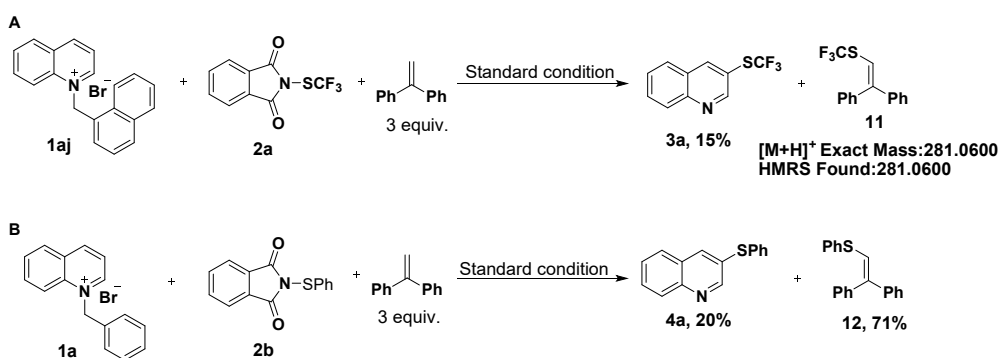

**A:** **1aj** (0.1 mmol), **2a** (0.2 mmol), Tretinoin (0.05 mmol) and radical scavenger ethene-1,1-diylidibenzene (3.0 equiv) were added into 2 mL DCE. The resulting solution was stirred at 100°C under air for 16 h. Then, the reaction mixture was detected by ESI-HRMS.

**B:** **1a** (0.1 mmol), **2b** (0.2 mmol) and radical scavenger ethene-1,1-diylidibenzene (3.0 equiv) were added into 2 mL DCE. The resulting solution was stirred at 100°C under air for 16 h.

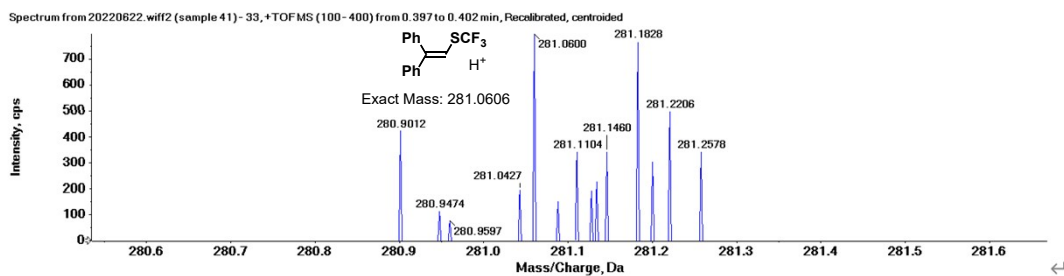

### 2.10.6 H/D kinetic isotope effects study.

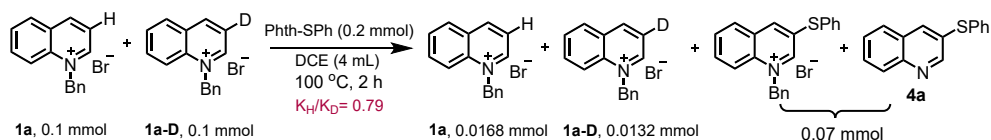

An oven-dried 25 mL Schlenk tube equipped with magnetic stirring bar was charged with **1a** (0.1 mmol), **1a-D** (0.1 mol), **2b** (0.2 mmol), DCE (4 mL). The reaction mixture was stirred at 100°C for 2 h under air. The reaction mixture was filtered and the solvent was evaporated in vacuum. The crude product was purified by flash column chromatography on silica gel using DCM: Methanol=10:1 as eluent to afford the desired products. The KIE value was determined to be  $k_H/k_D$ :  $[1a-D]/[1a] = 0.79$  based on  $^1H$  NMR analysis.

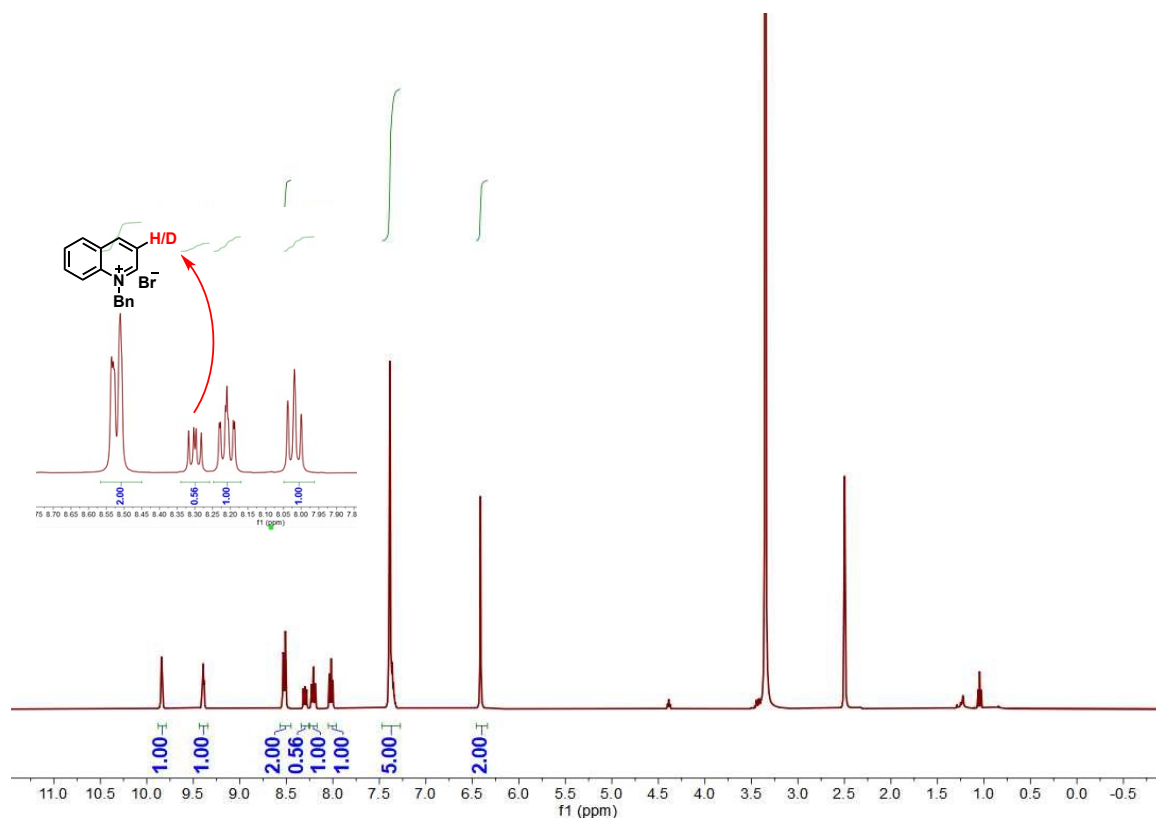

### 2.11. Computational studies

All calculations were performed using Gaussian 09 program package,<sup>[4]</sup> employing the B3LYP functional<sup>[5]</sup> with the 6-311g (d, p) basis set. Geometries were optimized in 1,2-dichloroethane

solvent and characterized by frequency analysis at 373 K. The self-consistent reaction field (SCRF) method based on the universal solvation model SMD<sup>[6]</sup> was adopted to evaluate the effect of solvent. Dispersion corrections were computed with Grimme's D3 method in structural optimization.<sup>[7,8]</sup> The intrinsic reaction coordinate (IRC) path was traced to check the energy profiles connecting each transition state to two associated minima of the proposed mechanism.<sup>[9]</sup> The global nucleophilicity index ( $N$ ) of *N*-benzyl quinolinium was obtained based on the conceptual density functional theory<sup>[10]</sup>, using equation (1):

$$N = E_{HOMO(Nu)}(eV) - E_{HOMO(TCE)}(eV) \quad (1)$$

where  $E_{HOMO(Nu)}$  is the HOMO energy of the nucleophile and  $E_{HOMO(TCE)}$  corresponds to the HOMO energy of the tetracyanoethylene (TCE) taken as reference. The local nucleophilicity index  $N_k$  was defined as  $N_k = NP_k^-$ , where the atom  $k$  nucleophilic Parr functions ( $P_k^-$ ) was from the Mulliken atomic spin density (ASD) analysis at the radical cation of the corresponding reagent.

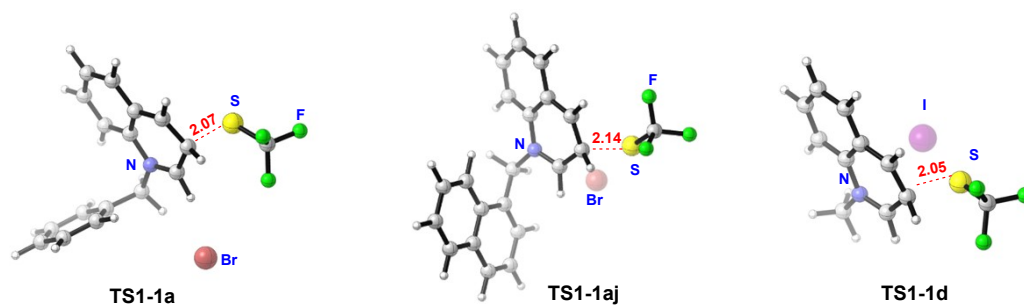

**Figure 1.** Optimized geometries of transition states.

**Cartesian coordinates and the corresponding energies of all stationary points in this work.**

#### *N*-benzyl quinolinium (1a)

Zero-point correction = 0.25846 a.u.

Thermal correction to Gibbs Free Energy = 0.19469 a.u.

Sum of electronic and zero-point Energies = -3247.06207 a.u.

Sum of electronic and thermal Free Energies = -3247.12584 a.u.

|   | X           | Y           | Z           |
|---|-------------|-------------|-------------|
| C | 1.10808900  | -0.28528900 | 1.14230200  |
| C | 0.04141000  | 1.38047300  | -0.17856500 |
| C | 0.76111600  | 2.38714600  | 0.52193300  |
| C | 1.65051600  | 2.00357800  | 1.55812300  |
| C | 1.82140200  | 0.68181800  | 1.86277800  |
| H | -1.41935400 | 0.99407100  | -1.73458400 |
| H | 1.18502700  | -1.33392500 | 1.37018900  |
| C | -0.85286300 | 1.74251200  | -1.20239500 |
| C | 0.56734100  | 3.74124000  | 0.16553700  |
| H | 2.18913500  | 2.77435900  | 2.09650900  |
| H | 2.50025900  | 0.35149800  | 2.63561600  |
| C | -0.30595700 | 4.08155800  | -0.84049900 |
| C | -1.01578100 | 3.07475900  | -1.52177500 |
| H | 1.12352800  | 4.49968100  | 0.70341000  |
| H | -0.45152300 | 5.12012300  | -1.11053500 |
| H | -1.70567500 | 3.34658000  | -2.31137400 |
| N | 0.23967000  | 0.05555500  | 0.18639500  |
| C | -4.60999800 | -1.49830800 | 0.57038800  |

|    |             |             |             |
|----|-------------|-------------|-------------|
| C  | -3.67840100 | -1.11842500 | 1.53506500  |
| C  | -2.33941400 | -0.95085100 | 1.19008900  |
| C  | -1.91990500 | -1.15617400 | -0.12621500 |
| C  | -2.85842200 | -1.53005800 | -1.09063400 |
| C  | -4.19622400 | -1.70523900 | -0.74403900 |
| H  | -5.65156900 | -1.62807400 | 0.84067300  |
| H  | -3.99279500 | -0.95315400 | 2.55923700  |
| H  | -1.62633300 | -0.65482000 | 1.95082300  |
| H  | -2.53986800 | -1.68150100 | -2.11646000 |
| H  | -4.91462500 | -1.99567900 | -1.50199100 |
| C  | -0.46654100 | -1.03085100 | -0.52489100 |
| H  | 0.09205400  | -1.94081600 | -0.30744300 |
| H  | -0.36693400 | -0.85575200 | -1.59465100 |
| Br | 3.19036500  | -1.86682300 | -0.47678300 |

### ***N*-methyl quinolinium (1d)**

Zero-point correction = 0.17769 a.u.

Thermal correction to Gibbs Free Energy = 0.12352 a.u.

Sum of electronic and zero-point Energies = -7361.40329 a.u.

Sum of electronic and thermal Free Energies = -7361.45746 a.u.

|   |             | X           | Y           | Z |
|---|-------------|-------------|-------------|---|
| C | -0.14868400 | 1.65769100  | 1.11843000  |   |
| C | -1.70455900 | -0.03714100 | 0.55653300  |   |
| C | -2.09682600 | 0.71461600  | -0.58769600 |   |
| C | -1.48270600 | 1.96176400  | -0.83503300 |   |
| C | -0.51386200 | 2.42968100  | 0.01586500  |   |
| H | -2.01043100 | -1.86886000 | 1.67655600  |   |
| H | 0.61823000  | 1.98119400  | 1.80553700  |   |
| C | -2.30204400 | -1.28506300 | 0.81678300  |   |
| C | -3.09028700 | 0.18566400  | -1.44644800 |   |
| H | -1.78141000 | 2.53232900  | -1.70612900 |   |
| H | -0.00969400 | 3.37121400  | -0.14793400 |   |
| C | -3.66378300 | -1.03256300 | -1.18031800 |   |
| C | -3.26440300 | -1.76579300 | -0.04388700 |   |
| H | -3.37944600 | 0.76362100  | -2.31567800 |   |
| H | -4.42102000 | -1.43635500 | -1.84061100 |   |
| H | -3.71953000 | -2.72783700 | 0.15747400  |   |
| N | -0.72837200 | 0.48797900  | 1.38704700  |   |
| C | -0.26733300 | -0.28468100 | 2.55511000  |   |
| H | 0.49337500  | 0.29315300  | 3.07072900  |   |
| H | 0.16394600  | -1.22472100 | 2.21399800  |   |
| H | -1.10785900 | -0.47015600 | 3.22254900  |   |
| I | 2.48036500  | -0.37536800 | -0.40871400 |   |

### ***N*-naphthyl quinolinium (1aj)**

Zero-point correction = 0.30575 a.u.

Thermal correction to Gibbs Free Energy = 0.23773 a.u.

Sum of electronic and zero-point Energies = -3400.71290 a.u.

Sum of electronic and thermal Free Energies = -3400.78091 a.u.

|    | X           | Y           | Z           |
|----|-------------|-------------|-------------|
| C  | 0.65720200  | -0.48028500 | 1.03785600  |
| C  | 1.82824300  | 1.09634500  | -0.29694800 |
| C  | 2.68051800  | 1.38051300  | 0.80846900  |
| C  | 2.47449300  | 0.70090700  | 2.03530000  |
| C  | 1.48310700  | -0.23309400 | 2.14127400  |
| H  | 1.45234900  | 1.52492000  | -2.39405000 |
| H  | -0.16997800 | -1.16573900 | 1.09553600  |
| C  | 2.05786400  | 1.74115000  | -1.52781200 |
| C  | 3.72132200  | 2.32411000  | 0.65289900  |
| H  | 3.12192000  | 0.92814000  | 2.87384100  |
| H  | 1.31092500  | -0.79200000 | 3.04987200  |
| C  | 3.92200500  | 2.95533000  | -0.55140000 |
| C  | 3.08746200  | 2.65240900  | -1.64278500 |
| H  | 4.35743900  | 2.53008200  | 1.50544100  |
| H  | 4.72189600  | 3.67611900  | -0.66669400 |
| H  | 3.25397400  | 3.13863600  | -2.59637600 |
| N  | 0.78737000  | 0.19536700  | -0.10557900 |
| C  | -2.01630600 | -1.74656000 | -0.80140000 |
| C  | -1.53050300 | -0.45849400 | -0.76825700 |
| C  | -2.36304100 | 0.60922800  | -0.30789300 |
| C  | -3.69500500 | 0.30494400  | 0.11923400  |
| C  | -4.15591900 | -1.03674900 | 0.06169900  |
| C  | -3.33647100 | -2.03922800 | -0.39087500 |
| H  | -0.92404200 | 2.21629300  | -0.56351900 |
| H  | -1.35860300 | -2.54770400 | -1.11751900 |
| C  | -1.92539900 | 1.95847700  | -0.24368400 |
| C  | -4.52841100 | 1.35247300  | 0.58906500  |
| H  | -5.16810700 | -1.25257700 | 0.38601800  |
| H  | -3.69052900 | -3.06269300 | -0.42839600 |
| C  | -4.07205900 | 2.64723200  | 0.64058300  |
| C  | -2.75867100 | 2.95062000  | 0.21762900  |
| H  | -5.53600900 | 1.10873800  | 0.90801700  |
| H  | -4.71650400 | 3.43975800  | 1.00298700  |
| H  | -2.40636600 | 3.97490900  | 0.25774700  |
| C  | -0.12303300 | -0.18945700 | -1.22771500 |
| H  | -0.11619200 | 0.61528800  | -1.95432700 |
| H  | 0.31413000  | -1.08704100 | -1.66859000 |
| Br | 1.47422000  | -3.24434100 | -0.06349600 |

**SCF<sub>3</sub> radical**



Zero-point correction = 0.01385 a.u.

Thermal correction to Gibbs Free Energy = -0.02427 a.u.

Sum of electronic and zero-point Energies = -735.88749 a.u.

Sum of electronic and thermal Free Energies = -735.92561 a.u.

|   | X           | Y           | Z           |
|---|-------------|-------------|-------------|
| S | -1.48876900 | -0.04078700 | 0.00131800  |
| C | 0.32730500  | -0.00386100 | 0.00018700  |
| F | 0.85501900  | -0.58106800 | 1.09019500  |
| F | 0.85309100  | -0.62522000 | -1.06665700 |
| F | 0.72038700  | 1.28137300  | -0.02600600 |

### TS1-1d

Zero-point correction = 0.19164 a.u.

Thermal correction to Gibbs Free Energy = 0.12515 a.u.

Sum of electronic and zero-point Energies = -8097.28885 a.u.

Sum of electronic and thermal Free Energies = -8097.35534 a.u.

|   | X           | Y           | Z           |
|---|-------------|-------------|-------------|
| C | -0.32613900 | -0.67760300 | 1.75051200  |
| C | 1.59191800  | -1.42437600 | 0.56416600  |
| C | 0.75968600  | -2.09180800 | -0.38691300 |
| C | -0.62763700 | -2.04632000 | -0.25623000 |
| C | -1.23619800 | -1.19239000 | 0.73553500  |
| H | 3.61037600  | -0.91919500 | 1.13397200  |
| H | -0.72239000 | -0.17708600 | 2.62250700  |
| C | 2.97831200  | -1.44110600 | 0.43155900  |
| C | 1.39006000  | -2.79662200 | -1.44718600 |
| H | -1.26163700 | -2.59248700 | -0.94186300 |
| H | -2.15886400 | -1.55685500 | 1.18060000  |
| C | 2.76048500  | -2.80734400 | -1.56609500 |
| C | 3.55542500  | -2.12396200 | -0.63010400 |
| H | 0.76208000  | -3.30757300 | -2.16659700 |
| H | 3.23065500  | -3.33605700 | -2.38584000 |
| H | 4.63292300  | -2.12370800 | -0.73420500 |
| N | 0.97131200  | -0.77555200 | 1.65084900  |
| C | 1.81623700  | -0.17736400 | 2.70527000  |
| H | 2.45790900  | -0.94880200 | 3.12713200  |
| H | 2.40913900  | 0.61976900  | 2.26038600  |
| S | -2.00728900 | 0.47439600  | -0.18458500 |
| C | -3.72226400 | -0.11944900 | -0.17970100 |
| F | -4.48846700 | 0.77293100  | -0.82944400 |
| F | -3.87244000 | -1.31251000 | -0.79577800 |
| F | -4.23656800 | -0.26887700 | 1.06104200  |
| H | 1.16698100  | 0.23418700  | 3.47178800  |
| I | 1.33826900  | 2.27570700  | -0.40410800 |

### TS1-1a

Zero-point correction = 0.27239 a.u.

Thermal correction to Gibbs Free Energy = 0.19599 a.u.

Sum of electronic and zero-point Energies = -3982.94966 a.u.  
Sum of electronic and thermal Free Energies = -3983.02606 a.u.

|    | X           | Y           | Z           |
|----|-------------|-------------|-------------|
| C  | 0.53155700  | -0.01855600 | 0.08753200  |
| C  | -0.96531800 | 1.77916900  | -0.36349800 |
| C  | -0.19432600 | 2.65186500  | 0.46572700  |
| C  | 0.96636700  | 2.17945900  | 1.08330500  |
| C  | 1.47732700  | 0.87884700  | 0.73785400  |
| H  | -2.67248800 | 1.60444400  | -1.66773600 |
| H  | 0.73175400  | -1.09415400 | 0.01742300  |
| C  | -2.09083600 | 2.25267900  | -1.03188000 |
| C  | -0.63862000 | 3.99137400  | 0.62593900  |
| H  | 1.53296300  | 2.81354400  | 1.75212500  |
| H  | 2.08014200  | 0.38446800  | 1.49350500  |
| C  | -1.75849800 | 4.44388900  | -0.03422800 |
| C  | -2.47810000 | 3.57750300  | -0.87314600 |
| H  | -0.06163400 | 4.64946700  | 1.26413200  |
| H  | -2.08281400 | 5.47003000  | 0.08583500  |
| H  | -3.35321400 | 3.93697600  | -1.39956600 |
| N  | -0.58013400 | 0.42111100  | -0.44180500 |
| C  | -5.15736700 | -1.19634300 | 1.06682800  |
| C  | -3.94479000 | -1.14626900 | 1.75338200  |
| C  | -2.75663000 | -0.93020900 | 1.06139600  |
| C  | -2.77164100 | -0.75377800 | -0.32420800 |
| C  | -3.98781000 | -0.80309400 | -1.00769700 |
| C  | -5.17602600 | -1.02884700 | -0.31619200 |
| H  | -6.08143300 | -1.36644100 | 1.60718500  |
| H  | -3.92292900 | -1.28135500 | 2.82859700  |
| H  | -1.81859400 | -0.90492600 | 1.60340500  |
| H  | -4.00338300 | -0.66496700 | -2.08338900 |
| H  | -6.11465900 | -1.06748700 | -0.85685600 |
| C  | -1.48737800 | -0.56935100 | -1.09412600 |
| H  | -0.92730600 | -1.50879000 | -1.12969400 |
| H  | -1.67188700 | -0.22997300 | -2.11193500 |
| Br | 0.52875600  | -3.48589000 | -0.16727000 |
| S  | 2.92490200  | 1.12505900  | -0.72338100 |
| C  | 4.23608300  | 0.15970500  | 0.07571700  |
| F  | 4.54826500  | 0.62920100  | 1.30226800  |
| F  | 3.91787600  | -1.13560700 | 0.22754700  |
| F  | 5.34469800  | 0.22955600  | -0.68071300 |

### TS1-1aj

Zero-point correction = 0.31940 a.u.  
Thermal correction to Gibbs Free Energy = 0.23958 a.u.  
Sum of electronic and zero-point Energies = -4136.60197 a.u.  
Sum of electronic and thermal Free Energies = -4136.68179 a.u.

|    | X           | Y           | Z           |
|----|-------------|-------------|-------------|
| C  | -0.11485900 | -0.27895100 | -0.14029300 |
| C  | -0.24747000 | 1.75229800  | 1.09164100  |
| C  | -1.24202000 | 2.24686800  | 0.19314800  |
| C  | -1.63623000 | 1.46675500  | -0.89856100 |
| C  | -1.23808100 | 0.09710200  | -0.99002400 |
| H  | 0.82453400  | 2.12487200  | 2.93378800  |
| H  | 0.44530500  | -1.17371900 | -0.35215200 |
| C  | 0.10991800  | 2.49893900  | 2.21653700  |
| C  | -1.79523100 | 3.53077000  | 0.43281200  |
| H  | -2.30903500 | 1.87693000  | -1.63901500 |
| H  | -1.17261900 | -0.33472200 | -1.98166100 |
| C  | -1.42135300 | 4.26191600  | 1.53692200  |
| C  | -0.47923100 | 3.73634500  | 2.43652800  |
| H  | -2.53596200 | 3.90654500  | -0.26252400 |
| H  | -1.86015800 | 5.23452300  | 1.72153900  |
| H  | -0.20255400 | 4.30035400  | 3.31857200  |
| N  | 0.37490800  | 0.53538800  | 0.76886800  |
| C  | 2.78466200  | -1.98489800 | 0.81938600  |
| C  | 2.57807200  | -0.63340300 | 0.65497200  |
| C  | 3.32029500  | 0.09163700  | -0.32982100 |
| C  | 4.26934900  | -0.61971100 | -1.13155100 |
| C  | 4.45445000  | -2.01178300 | -0.92251300 |
| C  | 3.73088800  | -2.67925400 | 0.03242600  |
| H  | 2.44388600  | 2.04750600  | 0.03470100  |
| H  | 2.18983500  | -2.52255100 | 1.54798400  |
| C  | 3.15190200  | 1.48293900  | -0.55803900 |
| C  | 5.00604200  | 0.08274100  | -2.11950300 |
| H  | 5.17819900  | -2.53670000 | -1.53635000 |
| H  | 3.87261100  | -3.74255200 | 0.18548700  |
| C  | 4.81716800  | 1.42927000  | -2.31538700 |
| C  | 3.88174400  | 2.13364400  | -1.52526200 |
| H  | 5.72312900  | -0.46696800 | -2.71942200 |
| H  | 5.38425300  | 1.95566800  | -3.07429600 |
| H  | 3.73927000  | 3.19644600  | -1.68359300 |
| C  | 1.57872300  | 0.07205900  | 1.53017500  |
| H  | 2.03022900  | 0.94606800  | 1.98644700  |
| H  | 1.19664900  | -0.59872900 | 2.30156300  |
| Br | -0.86422000 | -2.40536400 | 1.91892000  |
| S  | -2.89394000 | -1.11912200 | -0.37598300 |
| C  | -3.98067100 | -0.59011200 | -1.73223000 |
| F  | -5.00636700 | -1.46137600 | -1.83228300 |
| F  | -4.53276200 | 0.63706200  | -1.55873800 |
| F  | -3.37082800 | -0.55102200 | -2.94206700 |

## 2.12. Cyclic Voltammetry

Cyclic voltammetry and square wave voltammetry were performed on an ALS/CHI 660C/680C electrochemical analyzer. The measurements were conducted in 0.1M n-Bu<sub>4</sub>NPF<sub>6</sub>/DMA using a glassy carbon-disk working electrode; Pt disk as counter electrode; Ag/AgCl as reference electrode, at 0.05 V/s scan rate.

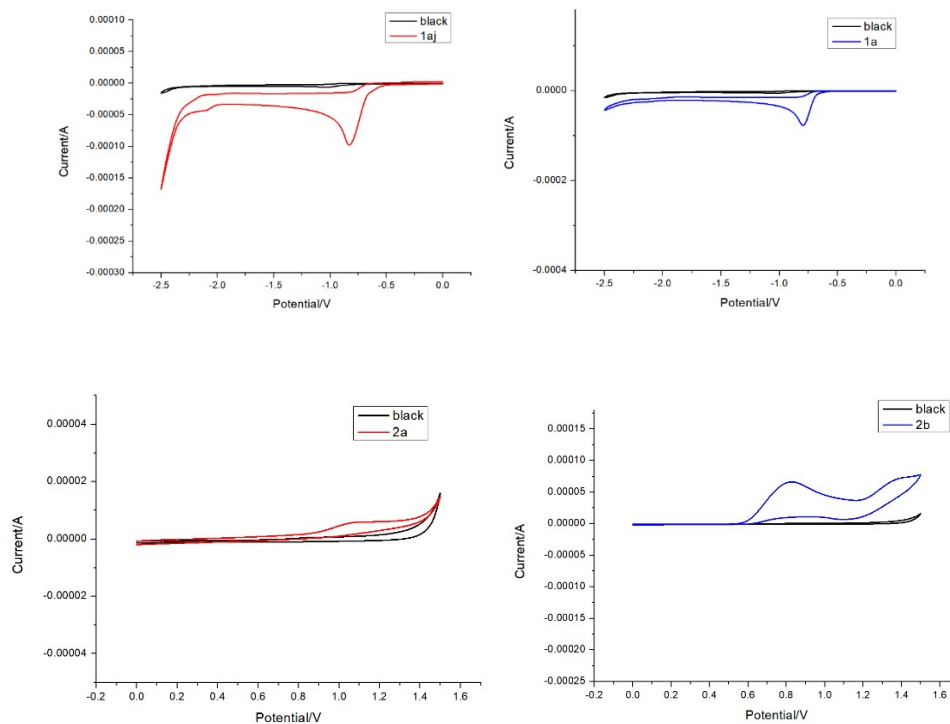

## 2.13. Additional evidence for mechanism studies via HMRS and GCMS.

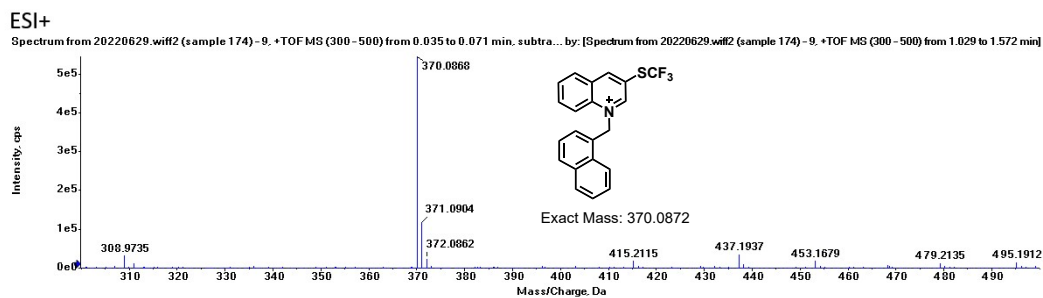

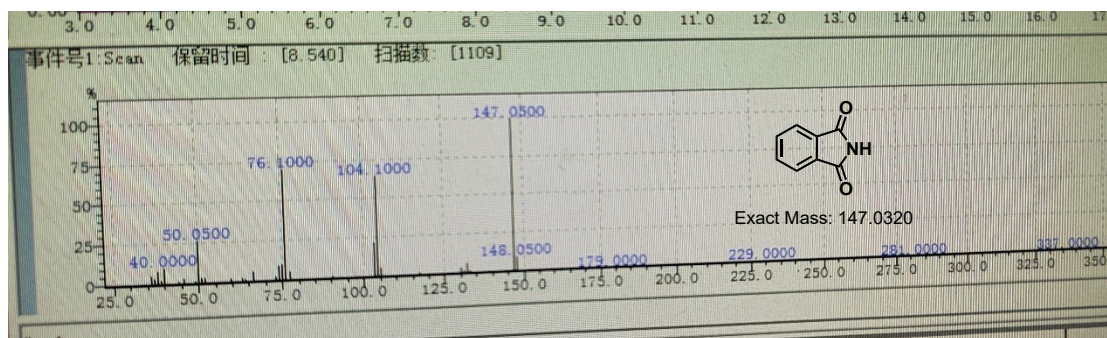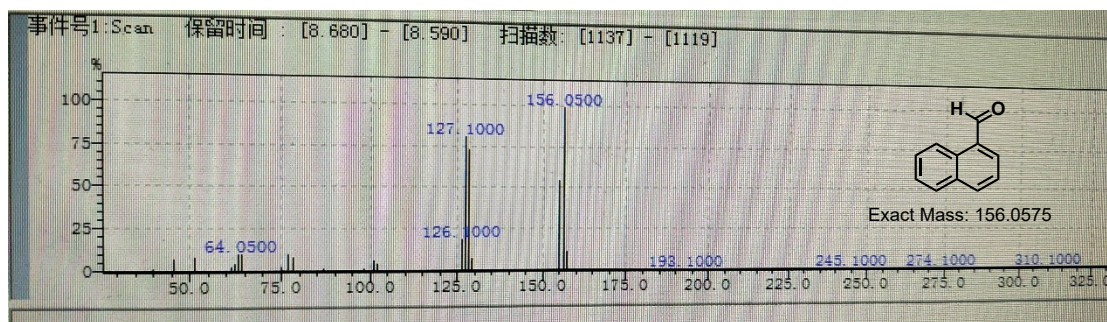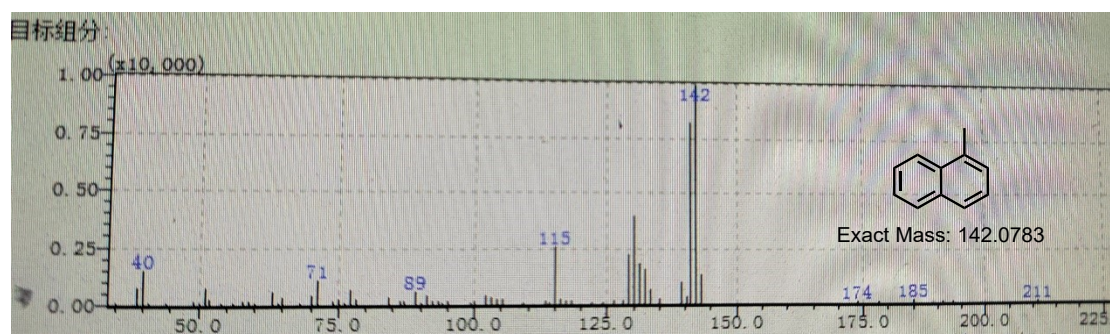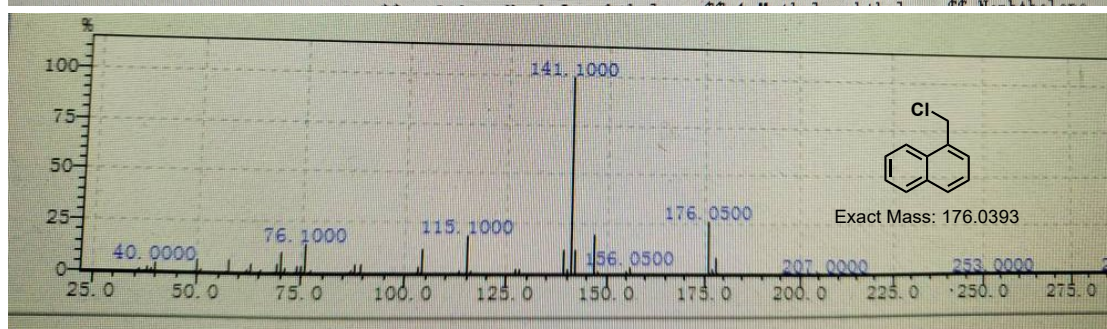

## 2.14. X-Ray crystallographic data.

### 2.14.1 Figure S2 Crystallographic structure of 5a

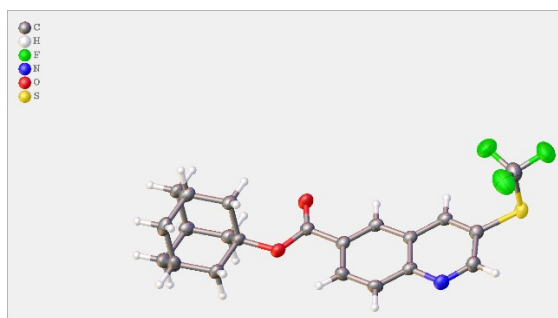

Crystal data and structure refinement for **5a** (CCDC 2223432)

Bond precision: C-C = 0.0053 Å Wavelength=0.71073

Cell: a=9.4973(11) b=7.3472(9) c=26.515(3)

alpha=90 beta=94.680(4) gamma=90

Temperature: 150 K

|                        | Calculated                                                        | Reported                                                          |
|------------------------|-------------------------------------------------------------------|-------------------------------------------------------------------|
| Volume                 | 1844.0(4)                                                         | 1844.0(4)                                                         |
| Space group            | P 21/c                                                            | P 1 21/c 1                                                        |
| Hall group             | -P 2ybc                                                           | -P 2ybc                                                           |
| Moiety formula         | C <sub>21</sub> H <sub>20</sub> F <sub>3</sub> N O <sub>2</sub> S | C <sub>21</sub> H <sub>20</sub> F <sub>3</sub> N O <sub>2</sub> S |
| Sum formula            | C <sub>21</sub> H <sub>20</sub> F <sub>3</sub> N O <sub>2</sub> S | C <sub>21</sub> H <sub>20</sub> F <sub>3</sub> N O <sub>2</sub> S |
| Mr                     | 407.44                                                            | 407.44                                                            |
| Dx, g cm <sup>-3</sup> | 1.468                                                             | 1.468                                                             |
| Z                      | 4                                                                 | 4                                                                 |
| Mu (mm <sup>-1</sup> ) | 0.222                                                             | 0.222                                                             |
| F <sub>000</sub>       | 848.0                                                             | 848.0                                                             |
| F <sub>000</sub> '     | 848.98                                                            |                                                                   |
| h,k,lmax               | 11,8,31                                                           | 11,8,31                                                           |
| Nref                   | 3250                                                              | 3227                                                              |
| Tmin,Tmax              | 0.951,0.987                                                       | 0.560,0.746                                                       |
| Tmin'                  | 0.942                                                             |                                                                   |

Correction method= # Reported T Limits: Tmin=0.560 Tmax=0.746

AbsCorr = MULTI-SCAN

Data completeness= 0.993 Theta(max)= 24.999

R(reflections)= 0.0696( 2498) wR2(reflections)=0.1733( 3227)

S = 1.072 Npar= 253

**2.14.2 Figure S2 Crystallographic structure of 10a**

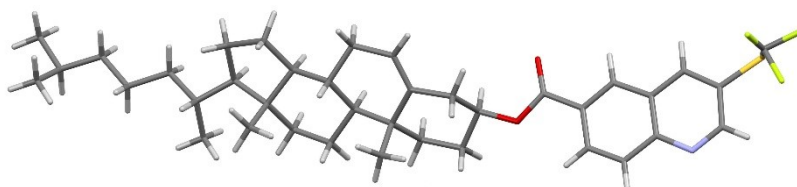

Crystal data and structure refinement for **10a** (CCDC 2225455)

Bond precision: C-C = 0.0058 Å Wavelength=1.54178

|                    |                                 |                                |                                 |
|--------------------|---------------------------------|--------------------------------|---------------------------------|
| Cell:              | a=11.5054(7)<br>alpha=84.517(3) | b=11.8944(8)<br>beta=75.634(2) | c=13.0322(8)<br>gamma=89.507(2) |
| Temperature: 173 K |                                 |                                |                                 |

|                | Calculated        | Reported             |
|----------------|-------------------|----------------------|
| Volume         | 1719.57(19)       | 1719.57(19)          |
| Space group    | P 1               | P 1                  |
| Hall group     | P 1               | P 1                  |
| Moiety formula | C38 H50 F3 N O2 S | 2(C38 H50 F3 N O2 S) |
| Sum formula    | C38 H50 F3 N O2 S | C76 H100 F6 N2 O4 S2 |
| Mr             | 641.85            | 1283.69              |
| Dx,g cm-3      | 1.240             | 1.240                |
| Z              | 2                 | 1                    |
| Mu (mm-1)      | 1.244             | 1.244                |
| F000           | 688.0             | 688.0                |
| F000'          | 690.66            |                      |
| h,k,lmax       | 13,14,15          | 13,14,15             |
| Nref           | 12630[ 6315]      | 12295                |
| Tmin,Tmax      | 0.752,0.830       | 0.753,0.905          |
| Tmin'          | 0.542             |                      |

Correction method=#Reported T Limits: Tmin=0.753 Tmax=0.905

AbsCorr = NUMERICAL

Data completeness= 1.95/0.97 Theta(max)= 68.389

R(reflections)= 0.0472(11622) wR2(reflections)=0.1327( 12295)

S = 1.036 Npar= 880

### 3. References.

- [1]. Tan, Z.; Ci C.; Y Jian.; Wu Y.; Cao L.; Jiang H.; Zhang M. Catalytic Conversion of *N*-Heteroaromatics to Functionalized Arylamines by Merging Hydrogen Transfer and Selective Coupling. *ACS Catal.* **2020**, *10*, 5243–5249.
- [2]. Ding Y.; Zhao W.; Song W.; Zhang Z.; Ma B. Mild and recyclable catalytic oxidation of pyridines to *N*-oxides with H<sub>2</sub>O<sub>2</sub> in water mediated by a vanadium-substituted polyoxometalate. *Green Chem.* **2011**, *13*, 1486.
- [3]. F Lei.; Chen L.; Yu J.; Wang L. Benzoyl Peroxide Promoted Radicalortho-Alkylation of Nitrogen Heteroaromatics with Simple Alkanes and Alcohols. *Eur J. Org. Chem.* **2015**, 1910–1914.
- [4] Frisch, M. J.; Trucks, G. W.; Schlegel, H. B.; Scuseria, G. E.; Robb, M. A.; Cheeseman, J. R.; Scalmani, G.; Barone, V.; Mennucci, B.; Petersson, G. A.; Nakatsuji, H.; Caricato, M.; Li, X.; Hratchian, H. P.; Izmaylov, A. F.; Bloino, J.; Zheng, G.; Sonnenberg, J. L.; Hada, M.; Ehara, M.; Toyota, K.; Fukuda, R.; Hasegawa, J.; Ishida, M.; Nakajima, T.; Honda, Y.; Kitao, O.; Nakai, H.; Vreven, T.; Montgomery, J. A.; Peralta, J. J. E.; Ogliaro, F.; Bearpark, M.; Heyd, J. J.; Brothers, E.; Kudin, K. N.; taroverov, V. N.; Keith, T.; Kobayashi, R.; Normand, J.; Raghavachari, K.; Rendell, A.; Burant, J. C.; Iyengar, S. S.; Tomasi, J.; Cossi, M.; Rega, N.; Millam, J. M.; Klene, M.; Knox, J. E.; Cross, J. B.; Bakken, V.; Adamo, C.; Jaramillo, J.; Gomperts, R.; Stratmann, R. E.; Yazyev, O.; Austin, A. J.; Cammi, R.; Pomelli, C.; Ochterski, J. W.; Martin, R. L.; Morokuma, K.; Zakrzewski, V. G.; Voth, G. A.; Salvador, P.; Dannenberg, J. J.; Dapprich, S.; Daniels, A. D.;

Farkas, O.; Foresman, J. B.; Ortiz, J. V.; Cioslowski, J.; Fox, D. J. Gaussian 09 (Revision D.01) I. Gaussian, Wallingford, CT, **2013**.

[5] Zhao Y.; Truhlar D. G., The M06 suite of density functionals for main group thermochemistry, thermochemical kinetics, noncovalent interactions, excited states, and transition elements: two new functionals and systematic testing of four M06-class functionals and 12 other functionals. *Theor Chem Account.* **120**, 215–241 .

[6] Marenich, A. V.; Cramer, C. J.; Truhlar, D. Universal Solvation Model Based on Solute Electron Density and on a Continuum Model of the Solvent Defined by the Bulk Dielectric Constant and Atomic Surface Tensions. *J. Phys. Chem. B* **2009**, *113*, 6378–6396.

[7] Grimme, S.; Antony, J.; Ehrlich, S.; Krieg, H. A Consistent and Accurate ab Initio Parametrization of Density Functional Dispersion Correction (DFT-D) for the 94 Elements H-Pu. *J. Chem. Phys.* **2010**, *132*, 154104–154119.

[8] Grimme, S.; Ehrlich, S.; Goerigk, L. Effect of the Damping Function in Dispersion Corrected Density Functional Theory. *J. Comput. Chem.* **2011**, **32**, 1456–1465.

[9] Gonzalez, C.; Schlegel, H. B. An Improved Algorithm for Reaction Path Following. *J. Chem. Phys.* **1989**, *90*, 2154–2161.

[10] Kohn, W.; Sham, L. J., Self-Consistent Equations Including Exchange and Correlation Effects. *Phys. Rev.*, **1965**, *140*, 1133–1138.

## 4.Characterization Data

### Characterization data for raw materials



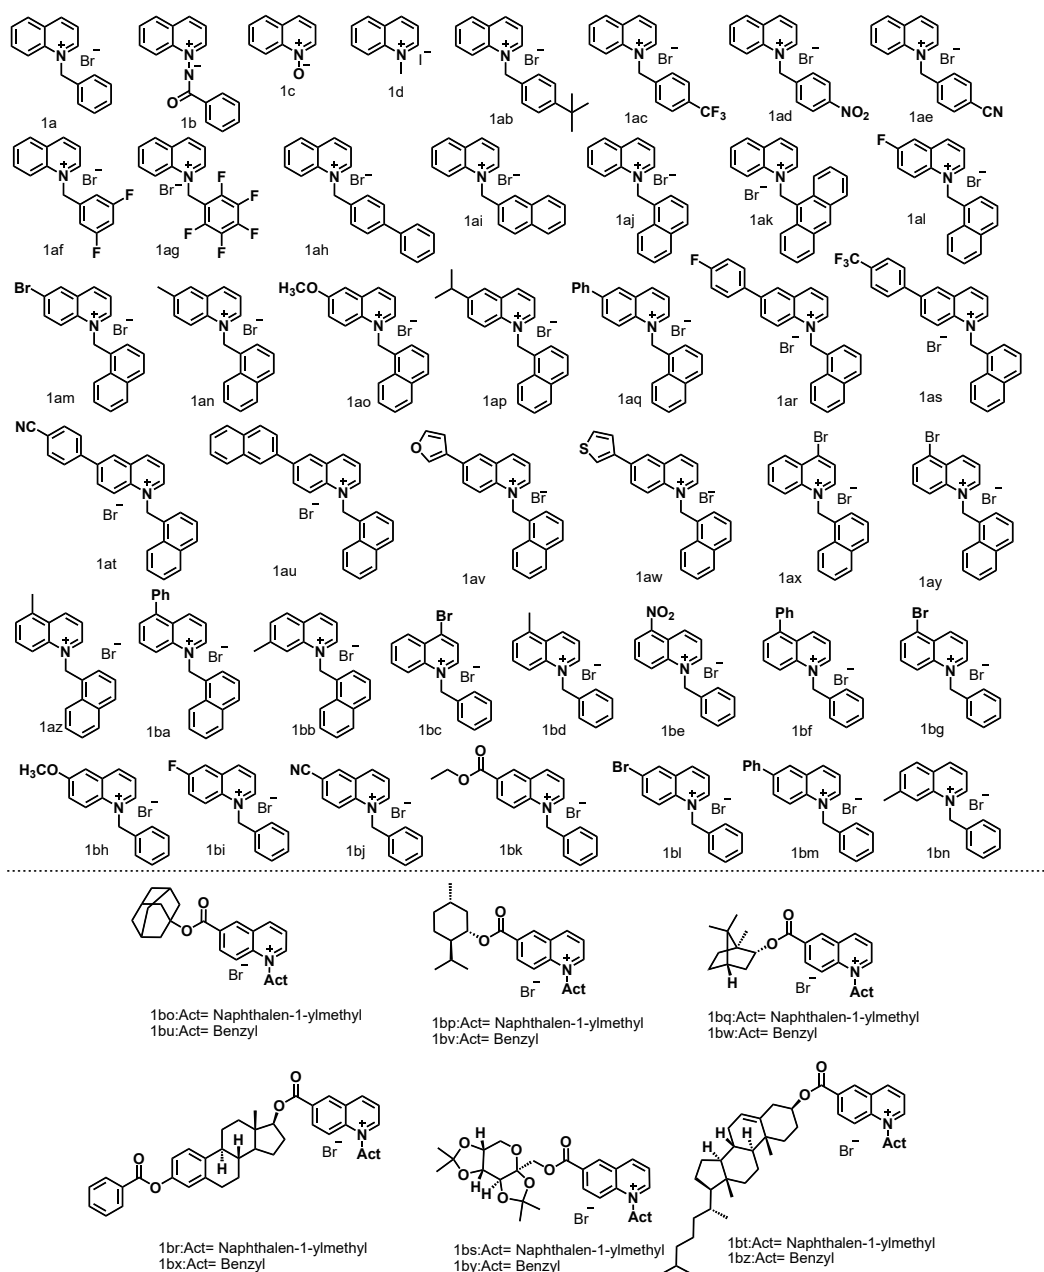

**1a, 1b, 1c, 1d, 1ae, 1ag, 1ah, 1ai, 1bg, 1bh, 1bi, 1bj, 1bl and 1bn** have been reported in the known literature.

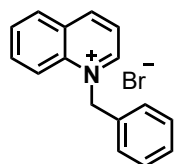

**1-benzylquinolin-1-ium bromide (1a):** White solid (807.4 mg, 90 % yield).  $^1\text{H}$  NMR (400 MHz, DMSO- $d_6$ )  $\delta$  9.81 (dd,  $J = 5.8, 1.5$  Hz, 1H), 9.40 (d,  $J = 8.4$  Hz, 1H), 8.53 (d,  $J = 8.2$  Hz, 2H), 8.31 (dd,  $J = 8.4, 5.8$  Hz, 1H), 8.22 (ddd,  $J = 8.8, 7.0, 1.5$  Hz, 1H), 8.02 (ddd,  $J = 8.1, 6.9, 0.8$  Hz, 1H), 7.46 – 7.27 (m, 5H), 6.41 (s, 2H).

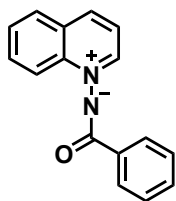

**N-Benzoyliminoquinolinium ylide (1b):** Brown solid (595.4 mg, 80 % yield).  $^1\text{H}$  NMR (400 MHz, Chloroform-*d*)  $\delta$  9.23 (d,  $J$  = 5.9 Hz, 1H), 8.82 (d,  $J$  = 8.9 Hz, 1H), 8.43 (d,  $J$  = 8.3 Hz, 1H), 8.36 – 8.25 (m, 2H), 8.03 (d,  $J$  = 8.2 Hz, 1H), 7.92 (ddd,  $J$  = 8.8, 6.9, 1.5 Hz, 1H), 7.78 (td,  $J$  = 7.6, 7.0, 1.1 Hz, 1H), 7.70 (dd,  $J$  = 8.4, 5.9 Hz, 1H), 7.47 (dd,  $J$  = 5.2, 2.0 Hz, 3H).

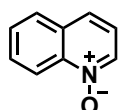

**Quinoline N-oxide (1c):** White solid (409.0 mg, 94 % yield).  $^1\text{H}$  NMR (400 MHz, Chloroform-*d*)  $\delta$  8.74 (d,  $J$  = 8.8 Hz, 1H), 8.53 (d,  $J$  = 6.0 Hz, 1H), 7.86 (dd,  $J$  = 8.2, 1.4 Hz, 1H), 7.75 (ddd,  $J$  = 8.8, 5.3, 3.8 Hz, 2H), 7.64 (ddd,  $J$  = 8.0, 6.8, 1.1 Hz, 1H), 7.29 (dd,  $J$  = 8.5, 6.0 Hz, 1H).

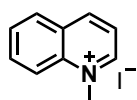

**1-methylquinolin-1-ium Iodide (1d):** White solid (257.4 mg, 95 % yield).  $^1\text{H}$  NMR (400 MHz, DMSO-*d*<sub>6</sub>)  $\delta$  9.53 (s, 1H), 9.30 (d,  $J$  = 8.3 Hz, 1H), 8.56 – 8.46 (m, 2H), 8.30 (ddt,  $J$  = 8.3, 7.0, 1.3 Hz, 1H), 8.17 (s, 1H), 8.07 (dd,  $J$  = 8.2, 7.0 Hz, 1H), 4.66 (s, 2H).

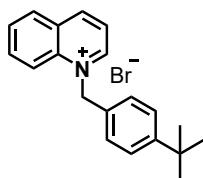

**1-(4-(tert-butyl)benzyl)quinolin-1-ium bromide (1ab):** White solid (852.2 mg, 80 % yield).  $^1\text{H}$  NMR (400 MHz, DMSO-*d*<sub>6</sub>)  $\delta$  9.81 (dd,  $J$  = 5.9, 1.5 Hz, 1H), 9.40 (dt,  $J$  = 8.4, 1.2 Hz, 1H), 8.75 – 8.56 (m, 1H), 8.53 (dd,  $J$  = 8.3, 1.5 Hz, 1H), 8.31 (dd,  $J$  = 8.4, 5.8 Hz, 1H), 8.24 (ddd,  $J$  = 8.9, 7.0, 1.5 Hz, 1H), 8.04 (ddd,  $J$  = 8.0, 7.0, 0.9 Hz, 1H), 7.41 (d,  $J$  = 8.5 Hz, 2H), 7.35 (d,  $J$  = 8.5 Hz, 2H), 6.37 (s, 2H), 1.23 (s, 9H).  $^{13}\text{C}$  NMR (101 MHz, DMSO-*d*<sub>6</sub>)  $\delta$  151.8, 150.8, 148.6, 138.0, 136.3, 131.4, 131.3, 130.5, 130.4, 127.7, 126.3, 122.9, 119.8, 60.0, 34.8, 31.4. HRMS (ESI)  $m/z$ : calcd for  $\text{C}_{20}\text{H}_{22}\text{N}^+$ : 276.1747; found: 276.1746.

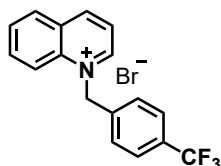

**1-(4-(trifluoromethyl)benzyl)quinolin-1-ium bromide (1ac):** White solid (935.8 mg, 85 % yield).  $^1\text{H}$  NMR (400 MHz, DMSO-*d*<sub>6</sub>)  $\delta$  9.83 (dd,  $J$  = 5.9, 1.4 Hz, 1H), 9.44 (d,  $J$  = 8.3 Hz, 1H), 8.54 (dd,  $J$  = 8.3, 1.4 Hz, 1H), 8.46 (d,  $J$  = 9.0 Hz, 1H), 8.34 (dd,  $J$  = 8.4, 5.8 Hz, 1H), 8.22 (ddd,  $J$  = 8.7, 6.9, 1.5 Hz,

1H), 8.04 (t,  $J = 7.6$  Hz, 1H), 7.76 (d,  $J = 8.0$  Hz, 2H), 7.59 (d,  $J = 8.0$  Hz, 2H), 6.53 (s, 2H).  $^{13}\text{C}$  NMR (101 MHz,  $\text{DMSO-}d_6$ )  $\delta$  151.3, 149.0, 138.9, 138.0, 136.5, 131.5, 130.6, 130.4, 129.6 (q,  $J = 32.2$  Hz), 128.5, 126.4 (q,  $J = 3.8$  Hz), 124.9 (d,  $J = 257.3$  Hz), 123.0, 119.5, 59.8. HRMS (ESI)  $m/z$ : calcd for  $\text{C}_{17}\text{H}_{13}\text{F}_3\text{N}^+$ : 288.0995; found: 288.0994.

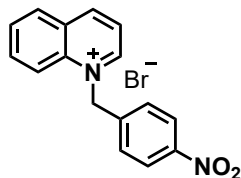

**1-(4-nitrobenzyl)quinolin-1-ium bromide (1ad):** Yellow solid (675.9 mg, 85 % yield).  $^1\text{H}$  NMR (400 MHz,  $\text{DMSO-}d_6$ )  $\delta$  9.84 (dd,  $J = 5.8, 1.5$  Hz, 1H), 9.45 (dt,  $J = 8.4, 1.1$  Hz, 1H), 8.55 (dd,  $J = 8.2, 1.5$  Hz, 1H), 8.42 (d,  $J = 8.9$  Hz, 1H), 8.35 (dd,  $J = 8.4, 5.8$  Hz, 1H), 8.26 – 8.16 (m, 3H), 8.04 (ddd,  $J = 8.0, 6.9, 0.9$  Hz, 1H), 7.71 – 7.51 (m, 2H), 6.59 (s, 2H).  $^{13}\text{C}$  NMR (101 MHz,  $\text{DMSO-}d_6$ )  $\delta$  151.5, 149.1, 148.0, 141.7, 138.0, 136.5, 131.5, 130.6, 130.5, 129.0, 124.6, 123.1, 119.6, 59.6. HRMS (ESI)  $m/z$ : calcd for  $\text{C}_{16}\text{H}_{13}\text{N}_2\text{O}_2^+$ : 265.0972; found: 265.0972.

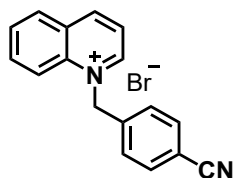

**1-(4-cyanobenzyl)quinolin-1-ium bromide (1ae):** Yellow solid (777.6 mg, 80 % yield).  $^1\text{H}$  NMR (400 MHz,  $\text{DMSO-}d_6$ )  $\delta$  9.82 (d,  $J = 5.8$  Hz, 1H), 9.44 (dd,  $J = 8.4, 1.2$  Hz, 1H), 8.55 (dd,  $J = 8.2, 1.5$  Hz, 1H), 8.49 – 8.37 (m, 1H), 8.33 (dd,  $J = 8.4, 5.8$  Hz, 1H), 8.21 (ddd,  $J = 8.8, 7.0, 1.5$  Hz, 1H), 8.04 (ddd,  $J = 8.1, 7.0, 0.9$  Hz, 1H), 7.88 (d,  $J = 8.4$  Hz, 2H), 7.56 (d,  $J = 8.5$  Hz, 2H), 6.53 (s, 2H).

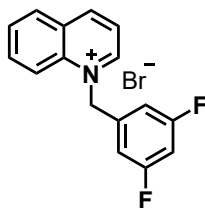

**1-(3,5-difluorobenzyl)quinolin-1-ium bromide (1af):** White solid (660.7 mg, 86 % yield).  $^1\text{H}$  NMR (400 MHz,  $\text{DMSO-}d_6$ )  $\delta$  9.77 (dd,  $J = 5.8, 1.4$  Hz, 1H), 9.41 (dt,  $J = 8.4, 1.1$  Hz, 1H), 8.54 (dd,  $J = 8.2, 1.5$  Hz, 1H), 8.45 (dd,  $J = 8.9, 1.0$  Hz, 1H), 8.30 (dd,  $J = 8.4, 5.8$  Hz, 1H), 8.23 (ddd,  $J = 8.8, 7.0, 1.5$  Hz, 1H), 8.04 (ddd,  $J = 8.0, 7.0, 0.9$  Hz, 1H), 7.36 – 7.12 (m, 3H), 6.41 (s, 2H).  $^{13}\text{C}$  NMR (101 MHz,  $\text{DMSO-}d_6$ )  $\delta$  163.1 (dd,  $J = 247.4, 13.3$  Hz), 151.5, 148.9, 138.5 (t,  $J = 9.9$  Hz), 138.0, 136.34, 131.4, 130.47, 130.45, 123.2, 119.5, 111.6 (dd,  $J = 19.1, 2.9$  Hz), 104.9 (t,  $J = 25.8$  Hz), 59.31. HRMS (ESI)  $m/z$ : calcd for  $\text{C}_{16}\text{H}_{12}\text{F}_2\text{N}^+$ : 256.0932; found: 256.0931.

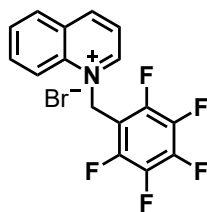

**1-((perfluorophenyl)methyl)quinolin-1-ium bromide (1ag):** White solid (736.7 mg, 85 % yield).  $^1\text{H}$  NMR (400 MHz,  $\text{DMSO-}d_6$ )  $\delta$  9.68 – 9.62 (m, 1H), 9.43 (d,  $J$  = 8.3 Hz, 1H), 8.56 (dd,  $J$  = 8.3, 1.5 Hz, 1H), 8.50 (d,  $J$  = 8.9 Hz, 1H), 8.35 (ddd,  $J$  = 8.9, 7.1, 1.6 Hz, 1H), 8.26 (dd,  $J$  = 8.3, 5.9 Hz, 1H), 8.10 (ddd,  $J$  = 8.0, 7.0, 0.9 Hz, 1H), 6.57 (s, 2H).

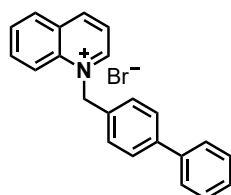

**1-([1,1'-biphenyl]-4-ylmethyl)quinolin-1-ium bromide (1ah):** White solid (956.2 mg, 85 % yield).  $^1\text{H}$  NMR (400 MHz,  $\text{DMSO-}d_6$ )  $\delta$  9.83 (dt,  $J$  = 4.1, 2.1 Hz, 1H), 9.41 (d,  $J$  = 7.9 Hz, 1H), 8.59 (d,  $J$  = 9.0 Hz, 1H), 8.53 (dd,  $J$  = 8.2, 1.5 Hz, 1H), 8.32 (dd,  $J$  = 8.4, 5.8 Hz, 1H), 8.24 (ddd,  $J$  = 8.8, 7.0, 1.5 Hz, 1H), 8.04 (ddd,  $J$  = 8.0, 7.0, 0.9 Hz, 1H), 7.69 (d,  $J$  = 8.4 Hz, 2H), 7.63 (dd,  $J$  = 8.2, 1.2 Hz, 2H), 7.50 (d,  $J$  = 8.0 Hz, 2H), 7.45 (t,  $J$  = 7.5 Hz, 2H), 7.39 – 7.34 (m, 1H), 6.44 (s, 2H).

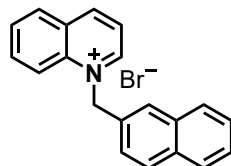

**1-(naphthalen-2-ylmethyl)quinolin-1-ium bromide (1ai):** White solid (686.5 mg, 89 % yield).  $^1\text{H}$  NMR (400 MHz,  $\text{DMSO-}d_6$ )  $\delta$  9.86 (dd,  $J$  = 5.9, 1.4 Hz, 1H), 9.43 (dd,  $J$  = 8.2, 1.3 Hz, 1H), 8.58 (d,  $J$  = 9.0 Hz, 1H), 8.53 (dd,  $J$  = 8.2, 1.5 Hz, 1H), 8.34 (dd,  $J$  = 8.4, 5.8 Hz, 1H), 8.20 (ddd,  $J$  = 8.8, 7.0, 1.5 Hz, 1H), 8.01 (ddd,  $J$  = 8.0, 6.9, 0.8 Hz, 1H), 7.97 (d,  $J$  = 8.6 Hz, 1H), 7.94 – 7.90 (m, 2H), 7.88 – 7.81 (m, 1H), 7.58 – 7.48 (m, 3H), 6.57 (s, 2H).  $^{13}\text{C}$  NMR (101 MHz,  $\text{DMSO-}d_6$ )  $\delta$  151.0, 148.7, 138.1, 136.3, 133.1, 131.9, 131.4, 130.5, 130.4, 129.4, 128.4, 128.2, 127.33, 127.30, 127.0, 125.3, 123.0, 119.8, 60.6. HRMS (ESI)  $m/z$ : calcd for  $\text{C}_{20}\text{H}_{16}\text{N}^+$ : 257.1199; found: 257.1199.

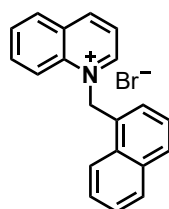

**1-(naphthalen-1-ylmethyl)quinolin-1-ium bromide (1aj):** White solid (594.2 mg, 90 % yield).  $^1\text{H}$  NMR (400 MHz,  $\text{DMSO-}d_6$ )  $\delta$  9.52 (d,  $J$  = 5.8 Hz, 1H), 9.47 (d,  $J$  = 8.3 Hz, 1H), 8.60 (dd,  $J$  = 8.3, 1.5 Hz, 1H), 8.43 (d,  $J$  = 8.9 Hz, 1H), 8.28 (dd,  $J$  = 8.4, 5.8 Hz, 1H), 8.21 (ddd,  $J$  = 8.9, 7.0, 1.5 Hz, 2H),

8.12 – 8.04 (m, 2H), 8.01 (d,  $J = 8.3$  Hz, 1H), 7.70 (dddd,  $J = 16.4, 8.1, 6.9, 1.4$  Hz, 2H), 7.40 (dd,  $J = 8.3, 7.2$  Hz, 1H), 6.91 (s, 2H), 6.79 (dd,  $J = 7.2, 1.1$  Hz, 1H).  $^{13}\text{C}$  NMR (101 MHz, DMSO- $d_6$ )  $\delta$  150.5, 148.9, 138.7, 136.4, 133.8, 131.4, 130.6, 130.4, 129.8, 129.7, 129.4, 127.8, 127.2, 126.1, 125.3, 123.5, 123.1, 119.8, 58.3. HRMS (ESI)  $m/z$ : calcd for  $\text{C}_{20}\text{H}_{16}\text{N}^+$ : 257.1199; found: 257.1198.

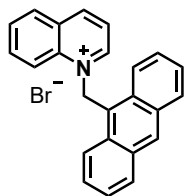

**1-(anthracen-9-ylmethyl)quinolin-1-ium bromide (1ak):** White solid (672.3 mg, 70 % yield).  $^1\text{H}$  NMR (400 MHz, DMSO- $d_6$ )  $\delta$  9.29 (dd,  $J = 18.4, 8.6$  Hz, 2H), 9.03 (s, 1H), 8.62 (s, 1H), 8.52 (ddd,  $J = 8.8, 7.1, 1.5$  Hz, 1H), 8.38 – 8.29 (m, 3H), 8.29 – 8.18 (m, 3H), 7.81 (dd,  $J = 8.3, 5.9$  Hz, 1H), 7.72 – 7.57 (m, 4H), 7.22 (s, 2H).  $^{13}\text{C}$  NMR (101 MHz, DMSO- $d_6$ )  $\delta$  148.0, 146.5, 139.5, 136.1, 132.3, 131.9, 131.7, 131.1, 130.7, 130.3, 130.1, 128.7, 126.3, 123.9, 122.8, 120.7, 120.3, 53.2. HRMS (ESI)  $m/z$ : calcd for  $\text{C}_{24}\text{H}_{18}\text{N}^+$ : 320.1434; found: 320.1433.

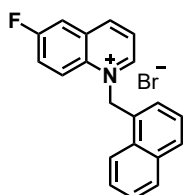

**6-fluoro-1-(naphthalen-1-ylmethyl)quinolin-1-ium bromide (1al):** White solid (734.7 mg, 85 % yield).  $^1\text{H}$  NMR (400 MHz, DMSO- $d_6$ )  $\delta$  9.48 – 9.42 (m, 1H), 9.39 (d,  $J = 8.5$  Hz, 1H), 8.57 (dd,  $J = 9.8, 4.4$  Hz, 1H), 8.48 (dd,  $J = 8.6, 2.8$  Hz, 1H), 8.30 (dd,  $J = 8.5, 5.8$  Hz, 1H), 8.24 – 8.15 (m, 2H), 8.10 (dd,  $J = 7.6, 1.9$  Hz, 1H), 8.03 (d,  $J = 8.3$  Hz, 1H), 7.77 – 7.65 (m, 2H), 7.42 (dd,  $J = 8.3, 7.1$  Hz, 1H), 6.91 (s, 2H), 6.84 (d,  $J = 7.1$  Hz, 1H).  $^{13}\text{C}$  NMR (101 MHz, DMSO- $d_6$ )  $\delta$  161.4 (d,  $J = 252.2$  Hz), 150.2, 148.2 (d,  $J = 5.1$  Hz), 136.0, 133.8, 131.9 (d,  $J = 11.1$  Hz), 130.4, 129.9, 129.6, 129.4, 127.8, 127.3, 126.1, 126.0 (d,  $J = 26.5$  Hz), 125.6, 124.1, 123.5, 123.4 (d,  $J = 9.8$  Hz), 114.7 (d,  $J = 23.1$  Hz), 58.8. HRMS (ESI)  $m/z$ : calcd for  $\text{C}_{20}\text{H}_{15}\text{FN}^+$ : 288.1183; found: 288.1185.

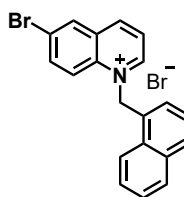

**6-bromo-1-(naphthalen-1-ylmethyl)quinolin-1-ium bromide (1am):** White solid (866.6 mg, 83 % yield).  $^1\text{H}$  NMR (400 MHz, DMSO- $d_6$ )  $\delta$  9.48 (d,  $J = 5.8$  Hz, 1H), 9.36 (d,  $J = 8.4$  Hz, 1H), 8.92 (d,  $J = 2.1$  Hz, 1H), 8.39 (d,  $J = 9.5$  Hz, 1H), 8.38 – 8.27 (m, 2H), 8.22 – 8.15 (m, 1H), 8.08 (dd,  $J = 7.7, 1.8$  Hz, 1H), 8.01 (d,  $J = 8.3$  Hz, 1H), 7.76 – 7.64 (m, 2H), 7.42 (s, 1H), 6.88 (s, 2H), 6.81 (d,  $J = 7.2$  Hz, 1H).  $^{13}\text{C}$  NMR (101 MHz, DMSO- $d_6$ )  $\delta$  151.0, 147.9, 138.8, 137.8, 133.8, 133.0, 131.6, 130.4, 129.8, 129.6, 129.4, 127.8, 127.3, 126.1, 125.5, 124.3, 123.8, 123.5, 122.1, 58.7. HRMS (ESI)  $m/z$ : calcd for  $\text{C}_{20}\text{H}_{15}\text{BrN}^+$ : 348.0382; found: 348.0385.

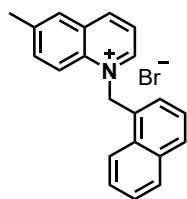

**6-methyl-1-(naphthalen-1-ylmethyl)quinolin-1-ium bromide (1an):** White solid (724.5 mg, 85 % yield).  $^1\text{H}$  NMR (400 MHz,  $\text{DMSO-}d_6$ )  $\delta$  9.45 (dd,  $J = 5.9, 1.4$  Hz, 1H), 9.34 (d,  $J = 8.3$  Hz, 1H), 8.38 – 8.30 (m, 2H), 8.28 – 8.18 (m, 2H), 8.12 – 8.01 (m, 2H), 8.00 (d,  $J = 8.3$  Hz, 1H), 7.71 (dddd,  $J = 17.6, 8.0, 6.9, 1.4$  Hz, 2H), 7.39 (dd,  $J = 8.3, 7.2$  Hz, 1H), 6.89 (s, 2H), 6.72 (dd,  $J = 7.2, 1.1$  Hz, 1H), 3.35 (s, 3H).  $^{13}\text{C}$  NMR (101 MHz,  $\text{DMSO-}d_6$ )  $\delta$  149.5, 148.0, 141.0, 138.4, 137.3, 133.8, 130.5, 130.3, 123.0, 129.7, 129.6, 129.4, 127.8, 127.2, 126.1, 125.0, 123.5, 123.1, 119.5, 58.3, 21.3. HRMS (ESI)  $m/z$ : calcd for  $\text{C}_{21}\text{H}_{18}\text{N}^+$ : 284.1434; found: 284.1434.

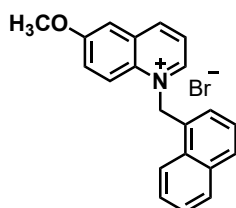

**6-methoxy-1-(naphthalen-1-ylmethyl)quinolin-1-ium bromide (1ao):** White solid (632.6 mg, 87 % yield).  $^1\text{H}$  NMR (400 MHz,  $\text{DMSO-}d_6$ )  $\delta$  9.34 (t,  $J = 4.7$  Hz, 1H), 9.29 (d,  $J = 7.7$  Hz, 1H), 8.33 (d,  $J = 9.7$  Hz, 1H), 8.22 (dd,  $J = 8.4, 5.9$  Hz, 2H), 8.08 (dd,  $J = 7.9, 1.6$  Hz, 1H), 8.03 – 7.97 (m, 2H), 7.84 (dd,  $J = 9.6, 2.9$  Hz, 1H), 7.71 (dddd,  $J = 17.5, 8.0, 6.9, 1.4$  Hz, 2H), 7.40 (dd,  $J = 8.3, 7.2$  Hz, 1H), 6.88 (d,  $J = 2.5$  Hz, 2H), 6.73 (dd,  $J = 7.2, 1.1$  Hz, 1H), 4.02 (s, 3H).  $^{13}\text{C}$  NMR (101 MHz,  $\text{DMSO-}d_6$ )  $\delta$  159.8, 147.6, 146.9, 134.4, 133.8, 132.5, 130.3, 130.0, 129.7, 129.3, 128.5, 127.8, 127.2, 126.1, 125.0, 123.5, 123.4, 121.5, 108.9, 58.4, 56.9. HRMS (ESI)  $m/z$ : calcd for  $\text{C}_{21}\text{H}_{18}\text{NO}^+$ : 300.1383; found: 300.1384.

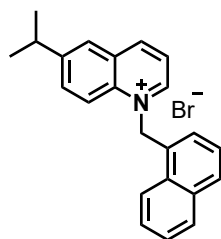

**6-isopropyl-1-(naphthalen-1-ylmethyl)quinolin-1-ium bromide (1ap):** White solid (824.1 mg, 88 % yield).  $^1\text{H}$  NMR (400 MHz,  $\text{DMSO-}d_6$ )  $\delta$  9.46 (d,  $J = 4.5$  Hz, 1H), 9.39 (d,  $J = 8.3$  Hz, 1H), 8.44 (d,  $J = 2.0$  Hz, 1H), 8.36 (d,  $J = 9.2$  Hz, 1H), 8.29 – 8.21 (m, 2H), 8.18 (dd,  $J = 9.2, 2.1$  Hz, 1H), 8.09 (dd,  $J = 7.9, 1.7$  Hz, 1H), 8.01 (d,  $J = 8.3$  Hz, 1H), 7.71 (dddd,  $J = 17.2, 8.1, 6.9, 1.4$  Hz, 2H), 7.41 (dd,  $J = 8.3, 7.1$  Hz, 1H), 6.90 (s, 2H), 6.80 (dd,  $J = 7.1, 1.2$  Hz, 1H), 1.34 (d,  $J = 6.9$  Hz, 6H).  $^{13}\text{C}$  NMR (101 MHz,  $\text{DMSO-}d_6$ )  $\delta$  151.1, 149.5, 148.3, 137.5, 136.3, 133.8, 130.7, 130.4, 129.9, 129.7, 129.4, 127.8, 127.2, 126.1, 125.3, 123.5, 123.1, 119.7, 58.2, 33.7, 23.7. HRMS (ESI)  $m/z$ : calcd for  $\text{C}_{23}\text{H}_{22}\text{N}^+$ : 312.1747; found: 312.1746.

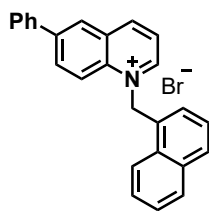

**1-(naphthalen-1-ylmethyl)-6-phenylquinolin-1-ium bromide (1aq):** White solid (346.1 mg, 89 % yield).  $^1\text{H}$  NMR (400 MHz,  $\text{DMSO-}d_6$ )  $\delta$  9.48 (dd,  $J = 10.4, 7.0$  Hz, 2H), 8.94 (d,  $J = 2.2$  Hz, 1H), 8.57 (dd,  $J = 9.3, 2.2$  Hz, 1H), 8.49 (d,  $J = 9.3$  Hz, 1H), 8.30 (dd,  $J = 8.4, 5.8$  Hz, 1H), 8.25 (d,  $J = 8.3$  Hz, 1H), 8.09 (dd,  $J = 8.0, 1.6$  Hz, 1H), 8.01 (d,  $J = 8.3$  Hz, 1H), 7.94 (dd,  $J = 7.3, 1.8$  Hz, 2H), 7.78 – 7.65 (m, 2H), 7.60 (dd,  $J = 8.3, 6.8$  Hz, 2H), 7.56 – 7.48 (m, 1H), 7.46 – 7.37 (m, 1H), 6.94 (s, 2H), 6.83 (d,  $J = 7.1$  Hz, 1H).  $^{13}\text{C}$  NMR (101 MHz,  $\text{DMSO-}d_6$ )  $\delta$  150.2, 148.9, 141.6, 138.1, 137.6, 135.2, 133.8, 131.0, 130.4, 129.91, 129.89, 129.73, 129.66, 129.4, 128.0, 127.9, 127.8, 127.3, 126.1, 125.3, 123.5, 120.5, 58.4. HRMS (ESI)  $m/z$ : calcd for  $\text{C}_{26}\text{H}_{20}\text{N}^+$ : 346.1590; found: 346.1595.

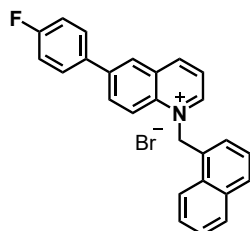

**6-(4-fluorophenyl)-1-(naphthalen-1-ylmethyl)quinolin-1-ium bromide (1ar):** White solid (928.6 mg, 85 % yield).  $^1\text{H}$  NMR (400 MHz,  $\text{DMSO-}d_6$ )  $\delta$  9.47 (d,  $J = 8.9$  Hz, 2H), 9.01 – 8.81 (m, 1H), 8.59 – 8.51 (m, 1H), 8.48 (d,  $J = 9.3$  Hz, 1H), 8.30 (dd,  $J = 8.4, 5.7$  Hz, 1H), 8.27 – 8.20 (m, 1H), 8.15 – 8.05 (m, 1H), 8.00 (dd,  $J = 8.5, 5.7$  Hz, 3H), 7.82 – 7.61 (m, 2H), 7.42 (tdd,  $J = 9.1, 7.0, 2.5$  Hz, 3H), 6.96 (s, 2H), 6.82 (d,  $J = 7.1$  Hz, 1H).  $^{13}\text{C}$  NMR (101 MHz,  $\text{DMSO-}d_6$ )  $\delta$  163.32 (d,  $J = 246.9$  Hz), 150.3, 148.8, 140.5, 138.0, 135.0, 134.1, 133.8, 130.9, 130.4, 130.2, 130.1, 129.9, 129.7, 129.4, 127.9, 127.8, 127.3, 126.1, 125.3, 123.6, 123.5, 120.5, 116.9, 116.7, 58.4. HRMS (ESI)  $m/z$ : calcd for  $\text{C}_{26}\text{H}_{19}\text{FN}^+$ : 364.1496; found: 364.1500.

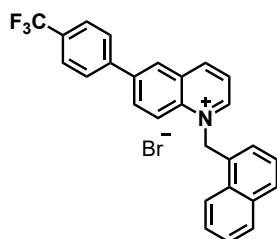

**1-(naphthalen-1-ylmethyl)-6-(4-(trifluoromethyl)phenyl)quinolin-1-ium bromide (1as):** White solid (1031.2 mg, 83 % yield).  $^1\text{H}$  NMR (400 MHz,  $\text{DMSO-}d_6$ )  $\delta$  9.67 – 9.42 (m, 2H), 9.13 – 8.99 (m, 1H), 8.62 (d,  $J = 9.3$  Hz, 1H), 8.55 (d,  $J = 9.3$  Hz, 1H), 8.39 – 8.30 (m, 1H), 8.26 (dd,  $J = 8.4, 4.8$  Hz, 1H), 8.18 (d,  $J = 8.1$  Hz, 2H), 8.10 (dd,  $J = 7.9, 1.6$  Hz, 1H), 8.02 (d,  $J = 8.2$  Hz, 1H), 7.99 – 7.92 (m, 2H), 7.80 – 7.64 (m, 2H), 7.43 (t,  $J = 7.7$  Hz, 1H), 6.98 (s, 2H), 6.85 (d,  $J = 7.2$  Hz, 1H).  $^{13}\text{C}$  NMR (101 MHz,  $\text{DMSO-}d_6$ )  $\delta$  150.7, 149.1, 141.6, 139.9, 138.5, 135.1, 133.8, 130.8, 130.4, 129.9, 129.8, 129.7 (q,  $J = 30.3$  Hz), 129.4, 129.1, 128.8, 127.8, 127.3, 126.7 (q,  $J = 4.1$  Hz), 126.1, 125.3, 124.6 (q,  $J = 273.71$  Hz), 123.8, 123.5, 120.7, 58.5. HRMS (ESI)  $m/z$ : calcd for  $\text{C}_{27}\text{H}_{19}\text{F}_3\text{N}^+$ : 414.1464; found: 414.1466.

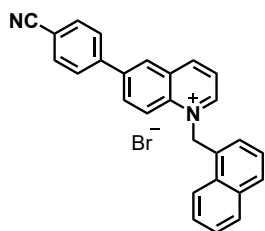

**6-(4-cyanophenyl)-1-(naphthalen-1-ylmethyl)quinolin-1-ium bromide (1at):** White solid (946.4 mg, 85 % yield).  $^1\text{H NMR}$  (400 MHz,  $\text{DMSO-}d_6$ )  $\delta$  9.46 (dd,  $J = 16.6, 7.4$  Hz, 2H), 9.01 – 8.76 (m, 1H), 8.55 (d,  $J = 9.3$  Hz, 1H), 8.48 (d,  $J = 9.3$  Hz, 1H), 8.30 (ddd,  $J = 8.5, 5.7, 2.8$  Hz, 1H), 8.24 (dd,  $J = 8.7, 3.4$  Hz, 1H), 8.09 (dd,  $J = 8.0, 1.6$  Hz, 1H), 8.00 (ddd,  $J = 8.8, 4.7, 2.0$  Hz, 3H), 7.80 – 7.53 (m, 2H), 7.50 – 7.31 (m, 3H), 6.93 (s, 2H), 6.82 (d,  $J = 7.1$  Hz, 1H).  $^{13}\text{C NMR}$  (101 MHz,  $\text{DMSO-}d_6$ )  $\delta$  164.5, 162.1, 150.2, 148.8, 140.5, 138.0, 135.0, 134.0, 133.8, 130.9, 130.3, 130.2, 130.1, 129.9, 129.7, 129.4, 127.9, 127.8, 127.3, 126.1, 125.3, 123.6, 123.5, 120.5, 116.9, 116.7, 58.4. HRMS (ESI)  $m/z$ : calcd for  $\text{C}_{27}\text{H}_{19}\text{N}_2^+$ : 371.1543; found: 371.1543.

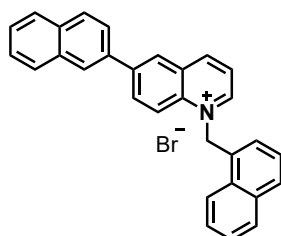

**1-(naphthalen-1-ylmethyl)-6-(naphthalen-2-yl)quinolin-1-ium bromide (1au):** White solid (974.9 mg, 82 % yield).  $^1\text{H NMR}$  (400 MHz,  $\text{DMSO-}d_6$ )  $\delta$  9.58 – 9.54 (m, 1H), 9.52 (d,  $J = 8.4$  Hz, 1H), 8.76 (d,  $J = 2.0$  Hz, 1H), 8.58 (d,  $J = 9.2$  Hz, 1H), 8.39 – 8.31 (m, 2H), 8.28 (d,  $J = 8.3$  Hz, 1H), 8.11 (ddd,  $J = 8.3, 4.0, 1.3$  Hz, 3H), 8.05 (d,  $J = 8.3$  Hz, 1H), 7.85 – 7.67 (m, 4H), 7.66 – 7.52 (m, 3H), 7.47 (dd,  $J = 8.3, 7.1$  Hz, 1H), 6.99 (s, 2H), 6.93 (d,  $J = 6.7$  Hz, 1H).  $^{13}\text{C NMR}$  (101 MHz,  $\text{DMSO-}d_6$ )  $\delta$  150.5, 148.9, 141.9, 138.2 (d,  $J = 3.1$  Hz), 137.0, 133.9, 133.8, 131.4, 130.9, 130.7, 130.4, 129.83, 129.81, 129.5, 129.4, 129.2, 128.4, 127.8, 127.6, 127.3, 126.9, 126.2, 125.4, 125.1, 123.5, 119.9, 58.5. HRMS (ESI)  $m/z$ : calcd for  $\text{C}_{30}\text{H}_{22}\text{N}^+$ : 396.1747; found: 396.1748.

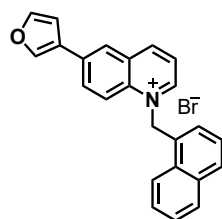

**6-(furan-2-yl)-1-(naphthalen-1-ylmethyl)quinolin-1-ium bromide (1av):** White solid (836.9 mg, 83 % yield).  $^1\text{H NMR}$  (400 MHz,  $\text{DMSO-}d_6$ )  $\delta$  9.42 (d,  $J = 5.8$  Hz, 1H), 9.33 (d,  $J = 8.3$  Hz, 1H), 8.82 (d,  $J = 2.0$  Hz, 1H), 8.56 (s, 1H), 8.50 (dd,  $J = 9.3, 2.0$  Hz, 1H), 8.44 (d,  $J = 9.3$  Hz, 1H), 8.35 – 8.19 (m, 2H), 8.10 (dd,  $J = 7.9, 1.7$  Hz, 1H), 8.02 (d,  $J = 8.3$  Hz, 1H), 7.91 (s, 1H), 7.72 (dddd,  $J = 17.3, 8.0, 6.9, 1.4$  Hz, 2H), 7.42 (dd,  $J = 8.3, 7.2$  Hz, 1H), 7.24 (d,  $J = 1.9$  Hz, 1H), 6.91 (s, 2H), 6.88 – 6.71 (m, 1H).  $^{13}\text{C NMR}$  (101 MHz,  $\text{DMSO-}d_6$ )  $\delta$  149.5, 148.1, 145.8, 142.5, 137.8, 134.3, 134.1, 133.8, 131.1, 130.4, 129.8, 129.77, 129.4, 127.8, 127.2, 126.1, 125.9, 125.5, 124.3, 123.6, 123.5, 120.4, 109.1, 58.3. HRMS (ESI)  $m/z$ : calcd for  $\text{C}_{24}\text{H}_{18}\text{NO}^+$ : 336.1383; found: 336.1385.



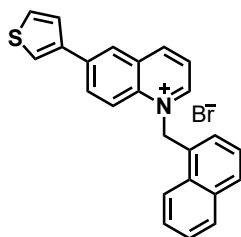

**1-(naphthalen-1-ylmethyl)-6-(thiophen-2-yl)quinolin-1-ium bromide (1aw):** White solid (866.2 mg, 82 % yield).  $^1\text{H}$  NMR (400 MHz,  $\text{DMSO-}d_6$ )  $\delta$  9.44 (s, 1H), 9.38 (d,  $J = 8.4$  Hz, 1H), 9.05 – 8.88 (m, 1H), 8.62 (dd,  $J = 9.3, 2.1$  Hz, 1H), 8.45 (d,  $J = 9.3$  Hz, 1H), 8.33 (dd,  $J = 2.9, 1.4$  Hz, 1H), 8.29 – 8.19 (m, 2H), 8.10 (dd,  $J = 8.0, 1.6$  Hz, 1H), 8.02 (d,  $J = 8.3$  Hz, 1H), 7.90 – 7.77 (m, 2H), 7.76 – 7.65 (m, 2H), 7.42 (t,  $J = 7.7$  Hz, 1H), 6.92 (s, 2H), 6.85 (d,  $J = 7.2$  Hz, 1H).  $^{13}\text{C}$  NMR (101 MHz,  $\text{DMSO-}d_6$ )  $\delta$  149.7, 148.4, 139.0, 137.8, 136.6, 134.7, 133.8, 131.1, 130.4, 129.9, 129.8, 129.4, 128.8, 127.8, 127.2, 126.7, 126.6, 126.1, 125.4, 125.3, 123.5, 120.4, 58.3. HRMS (ESI)  $m/z$ : calcd for  $\text{C}_{24}\text{H}_{18}\text{NS}^+$ : 352.1154; found: 352.1155.

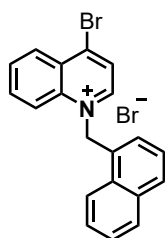

**4-bromo-1-(naphthalen-1-ylmethyl)quinolin-1-ium bromide (1ax):** White solid (887.4 mg, 85 % yield).  $^1\text{H}$  NMR (400 MHz,  $\text{DMSO-}d_6$ )  $\delta$  9.48 (d,  $J = 5.6$  Hz, 1H), 9.42 (d,  $J = 8.4$  Hz, 1H), 8.57 (dd,  $J = 9.8, 4.3$  Hz, 1H), 8.53 – 8.42 (m, 1H), 8.31 (dd,  $J = 8.4, 5.8$  Hz, 1H), 8.25 – 8.16 (m, 2H), 8.09 (dd,  $J = 7.7, 1.9$  Hz, 1H), 8.02 (d,  $J = 8.3$  Hz, 1H), 7.77 – 7.61 (m, 2H), 7.42 (t,  $J = 7.8$  Hz, 1H), 6.93 (s, 2H), 6.90 – 6.78 (m, 1H).  $^{13}\text{C}$  NMR (101 MHz,  $\text{DMSO-}d_6$ )  $\delta$  150.2, 148.2, 136.0, 133.8, 132.0, 131.9, 130.4, 129.9, 129.6, 129.4, 127.8, 127.3, 126.1, 125.9, 125.6, 124.1, 123.6, 123.4, 123.3, 58.8. HRMS (ESI)  $m/z$ : calcd for  $\text{C}_{20}\text{H}_{15}\text{BrN}^+$ : 348.0382; found: 348.0383.

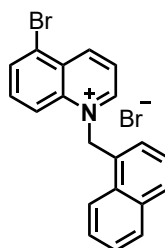

**5-bromo-1-(naphthalen-1-ylmethyl)quinolin-1-ium bromide (1ay):** White solid (887.2 mg, 84 % yield).  $^1\text{H}$  NMR (400 MHz,  $\text{DMSO-}d_6$ )  $\delta$  9.57 (d,  $J = 5.9$  Hz, 1H), 9.52 (d,  $J = 8.7$  Hz, 1H), 8.47 (dd,  $J = 14.5, 8.3$  Hz, 2H), 8.37 (dd,  $J = 8.7, 5.8$  Hz, 1H), 8.21 (dd,  $J = 8.0, 1.6$  Hz, 1H), 8.14 – 8.06 (m, 2H), 8.02 (d,  $J = 8.2$  Hz, 1H), 7.77 – 7.65 (m, 2H), 7.41 (dd,  $J = 8.3, 7.2$  Hz, 1H), 6.93 (s, 2H), 6.88 – 6.82 (m, 1H).  $^{13}\text{C}$  NMR (101 MHz,  $\text{DMSO-}d_6$ )  $\delta$  151.4, 147.6, 140.1, 136.6, 134.7, 133.8, 130.3, 129.8, 129.6, 129.4, 129.3, 127.8, 127.3, 126.1, 125.6, 124.6, 124.5, 123.6, 120.1, 59.1. HRMS (ESI)  $m/z$ : calcd for  $\text{C}_{20}\text{H}_{15}\text{BrN}^+$ : 348.0382; found: 348.0384.

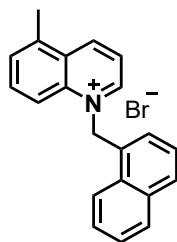

**5-methyl-1-(naphthalen-1-ylmethyl)quinolin-1-ium bromide (1az):** White solid (724.6 mg, 85 % yield).  $^1\text{H}$  NMR (400 MHz, Chloroform-*d*)  $\delta$  9.19 – 9.08 (m, 2H), 7.88 (dd,  $J = 8.6, 5.8$  Hz, 1H), 7.85 – 7.79 (m, 2H), 7.67 (dd,  $J = 9.0, 7.2$  Hz, 2H), 7.59 (d,  $J = 8.2$  Hz, 1H), 7.50 (d,  $J = 7.2$  Hz, 1H), 7.30 (dddd,  $J = 18.2, 8.0, 6.9, 1.4$  Hz, 2H), 6.98 (dd,  $J = 8.3, 7.2$  Hz, 1H), 6.51 (s, 2H), 6.31 (d,  $J = 7.1$  Hz, 1H), 2.95 (s, 3H).  $^{13}\text{C}$  NMR (101 MHz, Chloroform-*d*)  $\delta$  150.7, 144.1, 144.0, 140.9, 138.5, 135.6, 135.0, 134.8, 134.5, 134.4, 134.1, 132.5, 132.0, 130.8, 129.7, 128.2, 127.3, 127.2, 122.4, 63.4, 24.0. HRMS (ESI)  $m/z$ : calcd for  $\text{C}_{21}\text{H}_{18}\text{N}^+$ : 284.1434; found: 284.1431.

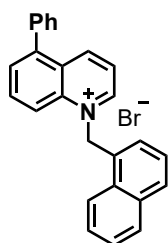

**1-(naphthalen-1-ylmethyl)-5-phenylquinolin-1-ium bromide (1ba) :** White solid (913.9 mg, 88 % yield).  $^1\text{H}$  NMR (400 MHz, DMSO-*d*<sub>6</sub>)  $\delta$  9.57 (s, 1H), 9.12 (d,  $J = 8.6$  Hz, 1H), 8.47 (d,  $J = 9.0$  Hz, 1H), 8.24 (ddd,  $J = 12.9, 8.9, 6.6$  Hz, 3H), 8.11 (dd,  $J = 8.0, 1.6$  Hz, 1H), 8.03 (dd,  $J = 7.7, 2.9$  Hz, 2H), 7.80 – 7.49 (m, 7H), 7.43 (dd,  $J = 8.3, 7.2$  Hz, 1H), 6.97 (s, 2H), 6.84 (d,  $J = 7.2$  Hz, 1H).  $^{13}\text{C}$  NMR (101 MHz, DMSO-*d*<sub>6</sub>)  $\delta$  150.5, 146.7, 142.9, 139.3, 137.2, 135.8, 133.8, 131.1, 130.8, 130.3, 129.9, 129.7, 129.5, 129.39, 129.36, 128.7, 127.8, 127.3, 126.1, 125.2, 123.5, 123.3, 119.2, 58.9. HRMS (ESI)  $m/z$ : calcd for  $\text{C}_{26}\text{H}_{20}\text{N}^+$ : 346.1590; found: 346.1591.

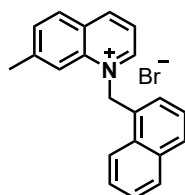

**7-methyl-1-(naphthalen-1-ylmethyl)quinolin-1-ium bromide (1bb):** White solid (740.0 mg, 90 % yield).  $^1\text{H}$  NMR (400 MHz, DMSO-*d*<sub>6</sub>)  $\delta$  9.50 – 9.17 (m, 2H), 8.49 (d,  $J = 8.5$  Hz, 1H), 8.39 (s, 1H), 8.23 – 8.13 (m, 2H), 8.13 – 8.06 (m, 1H), 8.02 (d,  $J = 8.3$  Hz, 1H), 7.94 (dd,  $J = 8.5, 1.3$  Hz, 1H), 7.77 – 7.60 (m, 2H), 7.42 (dd,  $J = 8.3, 7.2$  Hz, 1H), 6.86 (s, 2H), 6.83 – 6.70 (m, 1H), 3.35 (s, 3H).  $^{13}\text{C}$  NMR (101 MHz, DMSO-*d*<sub>6</sub>)  $\delta$  149.7, 148.33, 148.32, 139.2, 133.8, 132.6, 130.9, 130.5, 129.8, 129.8, 129.3, 128.7, 127.7, 127.2, 126.1, 125.4, 123.6, 122.1, 118.4, 58.0, 22.7. HRMS (ESI)  $m/z$ : calcd for  $\text{C}_{21}\text{H}_{18}\text{N}^+$ : 284.1434; found: 284.1433.

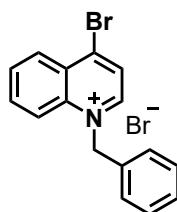

**1-benzyl-4-bromoquinolin-1-ium bromide (1bc):** White solid (786.8 mg, 88 % yield). <sup>1</sup>H NMR (400 MHz, DMSO-*d*<sub>6</sub>) δ 9.88 (dd, *J* = 5.8, 1.5 Hz, 1H), 9.46 (d, *J* = 8.7 Hz, 1H), 8.56 (d, *J* = 9.0 Hz, 1H), 8.48 – 8.35 (m, 2H), 8.10 (dd, *J* = 9.0, 7.7 Hz, 1H), 7.58 – 7.21 (m, 5H), 6.45 (s, 2H). <sup>13</sup>C NMR (101 MHz, DMSO-*d*<sub>6</sub>) δ 151.8, 147.3, 139.3, 136.4, 134.6, 134.1, 129.6, 129.38, 129.36, 127.8, 124.5, 124.4, 119.9, 61.0. HRMS (ESI) *m/z*: calcd for C<sub>16</sub>H<sub>13</sub>BrN<sup>+</sup>: 298.0226; found: 298.0225.

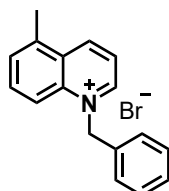

**1-benzyl-5-methylquinolin-1-ium bromide (1bd):** White solid (632.1 mg, 90 % yield). <sup>1</sup>H NMR (400 MHz, DMSO-*d*<sub>6</sub>) δ 9.79 (dd, *J* = 5.9, 1.5 Hz, 1H), 9.29 (d, *J* = 8.5 Hz, 1H), 8.45 (d, *J* = 9.1 Hz, 1H), 8.37 – 8.20 (m, 2H), 8.06 (dd, *J* = 9.2, 2.0 Hz, 1H), 7.58 – 7.28 (m, 5H), 6.42 (s, 2H), 2.57 (s, 3H). <sup>13</sup>C NMR (101 MHz, DMSO-*d*<sub>6</sub>) δ 149.8, 147.7, 140.9, 138.2, 136.5, 134.5, 130.5, 129.7, 129.6, 129.2, 127.8, 122.9, 119.6, 60.2, 21.3. HRMS (ESI) *m/z*: calcd for C<sub>17</sub>H<sub>16</sub>N<sup>+</sup>: 234.1277; found: 234.1278.

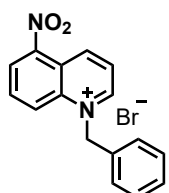

**1-benzyl-5-nitroquinolin-1-ium bromide (1be):** Yellow solid (887.4 mg, 85 % yield). <sup>1</sup>H NMR (400 MHz, DMSO-*d*<sub>6</sub>) δ 9.99 (d, *J* = 5.8 Hz, 1H), 9.62 (d, *J* = 9.0 Hz, 1H), 8.93 (d, *J* = 9.1 Hz, 1H), 8.74 (d, *J* = 7.7 Hz, 1H), 8.52 (dd, *J* = 9.0, 5.7 Hz, 1H), 8.37 (dd, *J* = 9.1, 7.8 Hz, 1H), 7.64 – 7.35 (m, 5H), 6.52 (s, 2H).

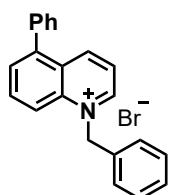

**1-benzyl-5-phenylquinolin-1-ium bromide (1bf) :** Yellow solid (755.1 mg, 85 % yield). <sup>1</sup>H NMR (400 MHz, DMSO-*d*<sub>6</sub>) δ 9.87 (dd, *J* = 5.8, 1.4 Hz, 1H), 9.04 (d, *J* = 8.7 Hz, 1H), 8.70 – 8.54 (m, 1H), 8.39 – 8.19 (m, 2H), 7.97 (dd, *J* = 7.3, 0.8 Hz, 1H), 7.75 – 7.55 (m, 5H), 7.52 – 7.19 (m, 5H), 6.49 (s, 2H). <sup>13</sup>C NMR (101 MHz, DMSO-*d*<sub>6</sub>) δ 150.9, 146.4, 143.0, 138.6, 137.2, 135.6, 134.4, 131.0, 130.7, 129.6, 129.5, 129.4, 129.3, 128.8, 127.8, 123.1, 119.2, 60.8. HRMS (ESI) *m/z*: calcd for C<sub>22</sub>H<sub>18</sub>N<sup>+</sup>: 296.1434; found: 296.1433.

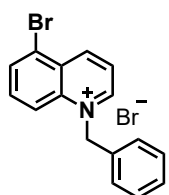

**1-benzyl-5-bromoquinolin-1-ium bromide (1bg):** White solid (886.2 mg, 88 % yield). <sup>1</sup>H NMR (400 MHz, DMSO-*d*<sub>6</sub>): δ 9.87 (d, *J* = 18.9 Hz, 1H), 9.46 (d, *J* = 8.7 Hz, 1H), 8.56 (t, *J* = 8.2 Hz, 1H), 8.40 (dt, *J* = 8.3, 3.2 Hz, 2H), 8.10 (dd, *J* = 9.0, 7.7 Hz, 1H), 7.49 – 7.29 (m, 5H), 6.44 (d, *J* = 11.5 Hz, 2H).

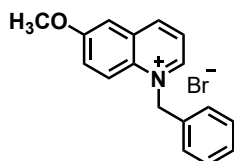

**1-benzyl-6-methoxyquinolin-1-ium bromide (1bh):** White solid (839.0 mg, 85 % yield). <sup>1</sup>H NMR (400 MHz, DMSO-*d*<sub>6</sub>) δ 9.64 (d, *J* = 5.8 Hz, 1H), 9.23 (d, *J* = 8.4 Hz, 1H), 8.45 (d, *J* = 9.7 Hz, 1H), 8.25 (dd, *J* = 8.5, 5.8 Hz, 1H), 7.97 (d, *J* = 2.9 Hz, 1H), 7.85 (dd, *J* = 9.7, 2.9 Hz, 1H), 7.60 – 7.25 (m, 5H), 6.39 (s, 2H), 3.98 (s, 3H).

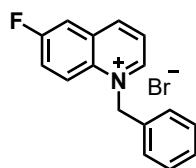

**1-benzyl-6-fluoroquinolin-1-ium bromide (1bi):** White solid (792.0 mg, 83 % yield). <sup>1</sup>H NMR (400 MHz, DMSO-*d*<sub>6</sub>) δ 9.89 – 9.75 (m, 1H), 9.36 (d, *J* = 8.5 Hz, 1H), 8.65 (dd, *J* = 9.8, 4.4 Hz, 1H), 8.43 (dd, *J* = 8.5, 2.9 Hz, 1H), 8.36 (dd, *J* = 8.4, 5.7 Hz, 1H), 8.19 (ddd, *J* = 9.7, 8.1, 3.0 Hz, 1H), 7.60 – 7.23 (m, 5H), 6.44 (s, 2H).

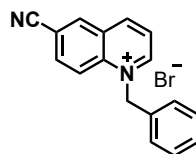

**1-benzyl-6-cyanoquinolin-1-ium bromide (1bj):** White solid (886.2 mg, 85 % yield). <sup>1</sup>H NMR (400 MHz, DMSO-*d*<sub>6</sub>) δ 9.99 – 9.91 (m, 1H), 9.45 (d, *J* = 8.4 Hz, 1H), 9.21 (s, 1H), 8.85 – 8.64 (m, 1H), 8.54 (dd, *J* = 9.2, 1.9 Hz, 1H), 8.49 – 8.41 (m, 1H), 7.48 – 7.28 (m, 5H), 6.45 (d, *J* = 2.4 Hz, 2H).

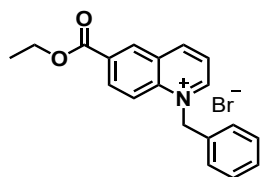

**1-benzyl-6-(ethoxycarbonyl)quinolin-1-ium bromide (1bk):** White solid (771.2 mg, 88 % yield). <sup>1</sup>H NMR (400 MHz, DMSO-*d*<sub>6</sub>) δ 9.95 (dd, *J* = 5.9, 1.5 Hz, 1H), 9.61 (d, *J* = 8.3 Hz, 1H), 9.16 (d, *J* = 1.9 Hz, 1H), 8.68 (d, *J* = 9.3 Hz, 1H), 8.56 (dd, *J* = 9.3, 2.0 Hz, 1H), 8.42 (dd, *J* = 8.4, 5.8 Hz, 1H), 7.56 – 7.27 (m, 5H), 6.46 (s, 2H), 4.43 (q, *J* = 7.1 Hz, 2H), 1.38 (t, *J* = 7.1 Hz, 3H). <sup>13</sup>C NMR (101 MHz, DMSO-*d*<sub>6</sub>) δ 164.5, 152.7, 149.9, 139.8, 134.6, 134.1, 133.2, 131.0, 130.2, 129.6, 129.3, 127.9, 124.0, 120.8, 62.4, 60.6, 14.6. HRMS (ESI) *m/z*: calcd for C<sub>19</sub>H<sub>18</sub>NO<sub>2</sub><sup>+</sup>: 292.1332; found: 292.1331.

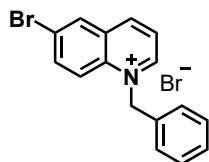

**1-benzyl-6-bromoquinolin-1-ium bromide (1bl):** White solid (937.5 mg, 83 % yield).  $^1\text{H}$  NMR (400 MHz,  $\text{DMSO-}d_6$ )  $\delta$  9.85 (d,  $J = 1.8$  Hz, 1H), 9.33 (d,  $J = 8.3$  Hz, 1H), 8.87 (d,  $J = 2.3$  Hz, 1H), 8.48 (d,  $J = 9.5$  Hz, 1H), 8.42 – 8.11 (m, 2H), 7.40 (d,  $J = 4.4$  Hz, 5H), 6.42 (s, 2H).

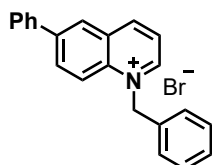

**1-benzyl-6-phenylquinolin-1-ium bromide (1bm):** White solid (732.3 mg, 83 % yield).  $^1\text{H}$  NMR (400 MHz,  $\text{DMSO-}d_6$ )  $\delta$  9.91 – 9.60 (m, 1H), 9.41 (d,  $J = 8.5$  Hz, 1H), 8.87 (s, 1H), 8.64 – 8.51 (m, 2H), 8.45 – 8.18 (m, 1H), 8.00 – 7.81 (m, 2H), 7.59 (td,  $J = 8.4, 7.7, 2.0$  Hz, 2H), 7.51 (td,  $J = 6.9, 6.3, 1.5$  Hz, 1H), 7.46 – 7.28 (m, 5H), 6.44 (s, 2H).  $^{13}\text{C}$  NMR (101 MHz,  $\text{DMSO-}d_6$ )  $\delta$  150.6, 148.6, 141.5, 137.5, 137.4, 135.0, 134.0, 131.0, 129.8, 129.6, 129.3, 128.1, 127.9, 127.8, 123.4, 120.5, 60.4. HRMS (ESI)  $m/z$ : calcd for  $\text{C}_{22}\text{H}_{18}\text{N}^+$ : 296.1434; found: 296.1433.

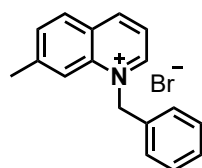

**1-benzyl-7-methylquinolin-1-ium bromide (1bn):** White solid (886.3 mg, 88 % yield).  $^1\text{H}$  NMR (400 MHz,  $\text{DMSO-}d_6$ )  $\delta$  9.71 (d,  $J = 6.1$  Hz, 1H), 9.33 (d,  $J = 7.4$  Hz, 1H), 8.54 – 8.33 (m, 2H), 8.21 (dd,  $J = 8.3, 5.8$  Hz, 1H), 7.88 (dd,  $J = 8.5, 1.3$  Hz, 1H), 7.60 – 7.09 (m, 5H), 6.37 (s, 2H), 3.35 (s, 3H).

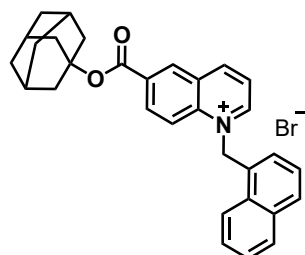

**6-((adamantan-1-yloxy)carbonyl)-1-(naphthalen-1-ylmethyl)quinolin-1-ium bromide (1bo) :** White solid (1210.2 mg, 88 % yield).  $^1\text{H}$  NMR (400 MHz,  $\text{DMSO-}d_6$ )  $\delta$  9.65 (d,  $J = 7.2$  Hz, 1H), 9.61 (dd,  $J = 5.9, 1.4$  Hz, 1H), 9.14 (d,  $J = 1.6$  Hz, 1H), 8.57 – 8.46 (m, 2H), 8.37 (dd,  $J = 8.4, 5.8$  Hz, 1H), 8.22 (dd,  $J = 8.2, 1.4$  Hz, 1H), 8.09 (dd,  $J = 7.9, 1.7$  Hz, 1H), 8.01 (d,  $J = 8.3$  Hz, 1H), 7.71 (dddd,  $J = 16.4, 8.0, 6.9, 1.4$  Hz, 2H), 7.39 (dd,  $J = 8.3, 7.2$  Hz, 1H), 6.94 (s, 2H), 6.79 (dd,  $J = 7.2, 1.1$  Hz, 1H), 2.26 (s, 6H), 2.22 (s, 3H), 1.69 (s, 6H).  $^{13}\text{C}$  NMR (101 MHz,  $\text{DMSO-}d_6$ )  $\delta$  163.3, 152.2, 150.3, 140.5, 134.8, 133.8, 133.0, 132.5, 130.3, 130.1, 129.7, 129.6, 129.3, 127.8, 127.2, 126.1, 125.3, 124.0, 123.5, 120.7, 82.8, 58.7, 41.3, 36.0, 30.8. HRMS (ESI)  $m/z$ : calcd for  $\text{C}_{31}\text{H}_{30}\text{NO}_2^+$ : 448.2271; found: 448.2275.

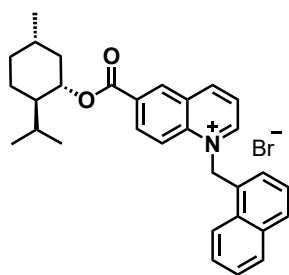

**6-(((1S,2R,5S)-2-isopropyl-5-methylcyclohexyl)oxy)carbonyl-1-(naphthalen-1-ylmethyl)quinoline-1-ium bromide (1bp)** : White solid (1193.8 mg, 88 % yield). <sup>1</sup>H NMR (400 MHz, DMSO-*d*<sub>6</sub>) δ 9.73 – 9.50 (m, 2H), 9.22 (d, *J* = 1.4 Hz, 1H), 8.56 (d, *J* = 1.7 Hz, 2H), 8.38 (tt, *J* = 6.1, 2.6 Hz, 1H), 8.22 (dd, *J* = 8.4, 3.0 Hz, 1H), 8.12 – 8.04 (m, 1H), 8.01 (d, *J* = 8.3 Hz, 1H), 7.79 – 7.59 (m, 2H), 7.43 – 7.28 (m, 1H), 6.95 (s, 2H), 6.80 (d, *J* = 6.6 Hz, 1H), 4.97 (td, *J* = 10.8, 4.4 Hz, 1H), 2.06 (dd, *J* = 12.3, 4.0 Hz, 1H), 1.91 (ddq, *J* = 9.7, 7.0, 3.4, 2.7 Hz, 1H), 1.71 (d, *J* = 12.2 Hz, 2H), 1.64 – 1.47 (m, 2H), 1.16 (dq, *J* = 19.6, 12.7, 12.3 Hz, 2H), 0.91 (dt, *J* = 12.0, 4.5 Hz, 7H), 0.76 (d, *J* = 6.9 Hz, 3H). <sup>13</sup>C NMR (101 MHz, DMSO-*d*<sub>6</sub>) δ 164.1, 152.4, 150.3, 140.6, 134.7, 133.8, 133.2, 131.1, 130.3, 130.2, 129.8, 129.6, 129.3, 127.8, 127.2, 126.1, 125.4, 124.1, 123.5, 120.9, 76.0, 58.7, 47.1, 34.1, 31.3, 26.6, 23.6, 22.3, 21.0, 16.9. HRMS (ESI) *m/z*: calcd for C<sub>31</sub>H<sub>34</sub>NO<sub>2</sub><sup>+</sup>: 452.2584; found: 452.2586.

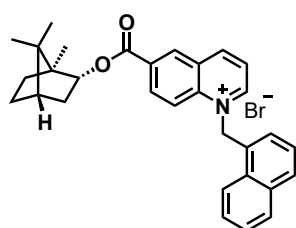

**1-(naphthalen-1-ylmethyl)-6-(((1S,2R,4S)-1,7,7-trimethylbicyclo[2.2.1]heptan-2-yl)oxy)carbonylquinolin-1-ium bromide (1bq)** : White solid (1121.1 mg, 83 % yield). <sup>1</sup>H NMR (400 MHz, DMSO-*d*<sub>6</sub>) δ 9.72 (s, 1H), 9.63 (dd, *J* = 6.0, 1.5 Hz, 1H), 9.23 (d, *J* = 1.9 Hz, 1H), 8.64 – 8.49 (m, 2H), 8.38 (dd, *J* = 8.4, 5.8 Hz, 1H), 8.29 – 8.14 (m, 1H), 8.09 (dd, *J* = 7.9, 1.6 Hz, 1H), 8.01 (d, *J* = 8.3 Hz, 1H), 7.71 (dddd, *J* = 17.5, 8.1, 6.9, 1.4 Hz, 2H), 7.39 (dd, *J* = 8.3, 7.2 Hz, 1H), 6.94 (s, 2H), 6.87 – 6.74 (m, 1H), 5.14 (ddd, *J* = 9.9, 3.5, 1.9 Hz, 1H), 2.44 (tt, *J* = 9.9, 4.1 Hz, 1H), 2.16 (ddd, *J* = 13.0, 9.0, 3.8 Hz, 1H), 1.85 – 1.67 (m, 2H), 1.37 (dddd, *J* = 32.5, 13.1, 7.0, 3.1 Hz, 1H), 1.17 (dd, *J* = 13.7, 3.5 Hz, 1H), 0.95 (s, 3H), 0.91 (s, 6H). <sup>13</sup>C NMR (101 MHz, DMSO-*d*<sub>6</sub>) δ 164.7, 152.4, 150.4, 140.5, 134.8, 133.8, 133.1, 131.3, 130.3, 130.2, 129.8, 129.7, 129.4, 127.8, 127.3, 126.1, 125.3, 124.1, 123.5, 120.9, 81.6, 58.7, 49.3, 48.1, 44.8, 36.7, 28.1, 27.4, 20.0, 19.1, 13.9. HRMS (ESI) *m/z*: calcd for C<sub>31</sub>H<sub>32</sub>NO<sub>2</sub><sup>+</sup>: 450.2428; found: 450.2430.

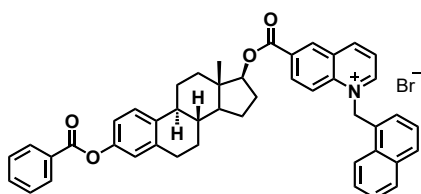

**6-(((8R,9S,13S,17S)-3-(benzoyloxy)-13-methyl-7,8,9,11,12,13,14,15,16,17-decahydro-6H-cyclopenta[a]phenanthren-17-yl)oxy)carbonyl-1-(naphthalen-1-ylmethyl)quinolin-1-ium**

**bromide (1br)** : White solid (1612.8 mg, 80 % yield).  $^1\text{H}$  NMR (400 MHz,  $\text{DMSO-}d_6$ )  $\delta$  9.70 (d,  $J = 8.4$  Hz, 1H), 9.61 (dd,  $J = 5.8, 1.4$  Hz, 1H), 9.23 (d,  $J = 1.8$  Hz, 1H), 8.68 – 8.50 (m, 2H), 8.38 (dd,  $J = 8.3, 5.7$  Hz, 1H), 8.23 (d,  $J = 8.1$  Hz, 1H), 8.17 – 8.06 (m, 3H), 8.02 (d,  $J = 8.4$  Hz, 1H), 7.84 – 7.65 (m, 3H), 7.61 (t,  $J = 7.8$  Hz, 2H), 7.44 – 7.30 (m, 2H), 7.02 (dd,  $J = 8.4, 2.6$  Hz, 1H), 6.99 – 6.91 (m, 3H), 6.82 (d,  $J = 7.2$  Hz, 1H), 4.98 (t,  $J = 8.3$  Hz, 1H), 2.93 – 2.72 (m, 2H), 2.41 – 2.18 (m, 3H), 1.97 – 1.83 (m, 2H), 1.83 – 1.67 (m, 2H), 1.62 – 1.29 (m, 6H), 1.02 (s, 3H).  $^{13}\text{C}$  NMR (101 MHz,  $\text{DMSO-}d_6$ )  $\delta$  165.2, 164.5, 152.4, 150.4, 148.9, 140.6, 138.3, 137.9, 134.8, 134.5, 133.8, 133.2, 131.2, 130.3, 130.22, 130.17, 129.8, 129.6, 129.5, 129.45, 129.4, 127.8, 127.3, 126.9, 126.1, 125.4, 124.1, 123.5, 122.0, 120.9, 119.4, 84.4, 58.7, 49.4, 43.8, 43.5, 38.3, 36.8, 29.4, 27.8, 27.0, 26.2, 23.4, 12.6. HRMS (ESI)  $m/z$ : calcd for  $\text{C}_{46}\text{H}_{42}\text{NO}_4^+$ : 672.3108; found: 672.3110.

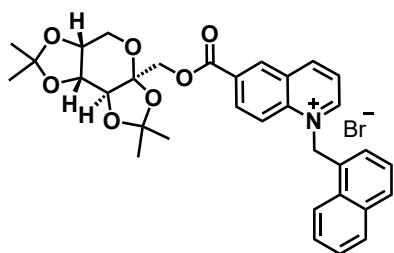

**1-(naphthalen-1-ylmethyl)-6-(((3aS,5aR,8aR,8bS)-2,2,7,7-tetramethyltetrahydro-3aH-bis([1,3]dioxolo)[4,5-b:4',5'-d]pyran-3a-yl)methoxy)carbonylquinolin-1-ium bromide (1bs)** : White solid (1385.0 mg, 83 % yield).  $^1\text{H}$  NMR (400 MHz,  $\text{DMSO-}d_6$ )  $\delta$  9.71 – 9.62 (m, 1H), 9.60 – 9.49 (m, 1H), 9.29 (s, 1H), 8.64 (dd,  $J = 9.3, 1.9$  Hz, 1H), 8.58 (dd,  $J = 9.4, 1.9$  Hz, 1H), 8.36 (qd,  $J = 5.3, 2.4$  Hz, 1H), 8.22 (d,  $J = 7.8$  Hz, 1H), 8.13 – 8.07 (m, 1H), 8.02 (d,  $J = 8.3$  Hz, 1H), 7.79 – 7.62 (m, 2H), 7.41 (dd,  $J = 8.3, 7.2$  Hz, 1H), 6.93 (s, 2H), 6.87 (d,  $J = 7.2$  Hz, 1H), 4.75 (d,  $J = 11.6$  Hz, 1H), 4.66 (dd,  $J = 7.9, 2.6$  Hz, 1H), 4.58 (t,  $J = 2.1$  Hz, 1H), 4.29 (dd,  $J = 10.1, 4.5$  Hz, 2H), 3.81 (dd,  $J = 13.1, 1.9$  Hz, 1H), 3.66 (d,  $J = 13.0$  Hz, 1H), 1.46 (s, 3H), 1.34 (s, 3H), 1.28 (d,  $J = 8.3$  Hz, 6H).  $^{13}\text{C}$  NMR (101 MHz,  $\text{DMSO-}d_6$ )  $\delta$  164.0, 152.4, 150.2, 140.7, 134.9, 133.8, 133.6, 130.6, 130.5, 130.1, 129.9, 129.4, 127.8, 127.3, 126.1, 125.8, 124.2, 123.6, 120.9, 108.8, 108.6, 101.4, 70.4, 69.7, 66.2, 61.2, 58.7, 26.7, 26.2, 25.7, 24.4. HRMS (ESI)  $m/z$ : calcd for  $\text{C}_{33}\text{H}_{34}\text{NO}_7^+$ : 556.2330; found: 556.2331.

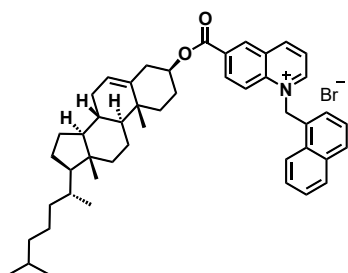

**6-(((3S,8S,9S,10R,13R,14S,17R)-10,13-dimethyl-17-((R)-6-methylheptan-2-yl)-2,3,4,7,8,9,10,11,12,13,14,15,16,17-tetradecahydro-1H-cyclopenta[a]phenanthren-3-yl)oxy)carbonyl-1-(naphthalen-1-ylmethyl)quinolin-1-ium bromide (1bt)** : White solid (1801.7 mg, 88 % yield).  $^1\text{H}$  NMR (400 MHz,  $\text{Chloroform-}d$ )  $\delta$  10.25 (d,  $J = 5.8$  Hz, 1H), 9.18 (d,  $J = 8.3$  Hz, 1H), 8.89 (d,  $J = 1.8$  Hz, 1H), 8.54 (dd,  $J = 9.3, 1.9$  Hz, 1H), 8.36 (d,  $J = 9.3$  Hz, 1H), 8.27 (ddd,  $J = 8.4, 4.3, 2.1$  Hz, 1H), 8.13 – 8.06 (m, 1H), 7.91 (dd,  $J = 7.6, 1.9$  Hz, 1H), 7.84 (d,  $J = 8.3$  Hz, 1H), 7.66 –

7.52 (m, 2H), 7.29 (dd,  $J = 8.3, 7.2$  Hz, 1H), 7.13 (s, 2H), 7.01 (d,  $J = 7.2$  Hz, 1H), 5.58 – 5.26 (m, 1H), 4.92 (tq,  $J = 10.8, 4.8$  Hz, 1H), 2.68 – 2.33 (m, 2H), 2.19 – 1.89 (m, 4H), 1.85 – 1.70 (m, 3H), 1.66 – 0.97 (m, 22H), 0.92 (d,  $J = 6.5$  Hz, 3H), 0.86 (dd,  $J = 6.6, 1.8$  Hz, 6H), 0.69 (s, 3H).  $^{13}\text{C}$  NMR (101 MHz, Chloroform-*d*)  $\delta$  163.2, 148.6, 140.1, 139.1, 135.5, 133.8, 132.6, 132.3, 130.2, 130.1, 129.4, 129.3, 128.0, 127.9, 126.9, 126.0, 125.4, 123.5, 123.4, 122.9, 122.3, 119.7, 56.7, 56.2, 50.0, 42.3, 39.7, 39.5, 38.3, 38.1, 36.9, 36.6, 36.2, 35.8, 31.9, 31.86, 28.2, 28.0, 27.8, 24.3, 23.8, 22.8, 22.6, 21.1, 19.4, 19.3, 18.7. HRMS (ESI)  $m/z$ : calcd for  $\text{C}_{48}\text{H}_{60}\text{NO}_2^+$ : 682.4619; found: 682.4622.

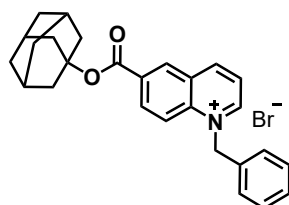

**6-((adamantan-1-yloxy)carbonyl)-1-benzylquinolin-1-ium bromide (1bu)**: White solid (979.0 mg, 82 % yield).  $^1\text{H}$  NMR (400 MHz, DMSO-*d*<sub>6</sub>)  $\delta$  9.90 (d,  $J = 5.9$  Hz, 1H), 9.58 (d,  $J = 8.4$  Hz, 1H), 9.07 (s, 1H), 8.63 (d,  $J = 9.4$  Hz, 1H), 8.57 – 8.46 (m, 1H), 8.40 (dd,  $J = 8.4, 5.8$  Hz, 1H), 7.40 (m, 5H), 6.44 (s, 2H), 2.34 – 2.09 (m, 9H), 1.68 (s, 6H).  $^{13}\text{C}$  NMR (101 MHz, DMSO-*d*<sub>6</sub>)  $\delta$  163.2, 152.6, 150.0, 139.7, 134.6, 134.1, 133.0, 132.4, 130.2, 129.6, 129.3, 127.9, 123.9, 120.7, 82.7, 60.6, 41.3, 36.0, 30.8. HRMS (ESI)  $m/z$ : calcd for  $\text{C}_{27}\text{H}_{28}\text{NO}_2^+$ : 398.2115; found: 398.2116.

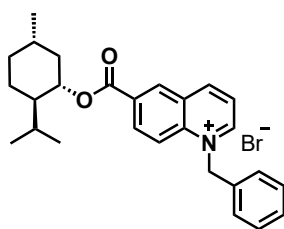

**1-benzyl-6-(((1S,2R,5S)-2-isopropyl-5-methylcyclohexyl)oxy)carbonylquinolin-1-ium bromide (1bv)**: White solid (1061.8 mg, 88 % yield).  $^1\text{H}$  NMR (400 MHz, Chloroform-*d*)  $\delta$  10.82 (d,  $J = 4.4$  Hz, 1H), 9.18 (d,  $J = 8.3$  Hz, 1H), 8.85 (d,  $J = 1.8$  Hz, 1H), 8.73 (d,  $J = 9.3$  Hz, 1H), 8.63 (dd,  $J = 9.3, 1.8$  Hz, 1H), 8.38 (dd,  $J = 8.4, 5.8$  Hz, 1H), 7.46 (dd,  $J = 7.5, 2.1$  Hz, 2H), 7.33 – 7.15 (m, 3H), 6.88 (s, 2H), 5.01 (td,  $J = 10.9, 4.4$  Hz, 1H), 2.10 (m, 2H), 1.90 (pd,  $J = 6.9, 2.7$  Hz, 1H), 1.76 (m, 2H), 1.59 (m, 2H), 1.24 – 1.06 (m, 2H), 0.93 (t,  $J = 7.0$  Hz, 6H), 0.77 (d,  $J = 6.9$  Hz, 3H).  $^{13}\text{C}$  NMR (101 MHz, Chloroform-*d*)  $\delta$  163.4, 152.4, 148.6, 139.8, 135.3, 132.8, 132.4, 132.2, 129.6, 129.4, 129.2, 127.7, 123.6, 120.5, 61.4, 47.1, 40.8, 34.1, 31.5, 26.4, 23.4, 21.9, 20.8, 16.3. HRMS (ESI)  $m/z$ : calcd for  $\text{C}_{27}\text{H}_{32}\text{NO}_2^+$ : 402.2428; found: 402.2427.

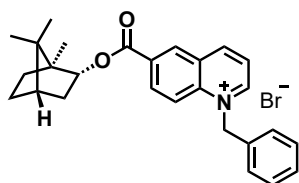

**1-benzyl-6-(((1S,2R,4S)-1,7,7-trimethylbicyclo[2.2.1]heptan-2-yl)oxy)carbonylquinolin-1-ium bromide (1bw)**: White solid (1044.5 mg, 87 % yield).  $^1\text{H}$  NMR (400 MHz, DMSO-*d*<sub>6</sub>)  $\delta$  9.95 (d,  $J = 1.8$  Hz, 1H), 9.66 (d,  $J = 8.4$  Hz, 1H), 9.17 (d,  $J = 1.9$  Hz, 1H), 8.67 (d,  $J = 9.4$  Hz, 1H), 8.59 (dd,  $J$



= 9.3, 1.9 Hz, 1H), 8.43 (dd,  $J = 8.4, 5.8$  Hz, 1H), 7.52 – 7.28 (m, 5H), 6.46 (s, 2H), 5.13 (ddd,  $J = 9.9, 3.5, 1.9$  Hz, 1H), 2.43 (ddt,  $J = 13.9, 10.0, 4.0$  Hz, 1H), 2.16 (ddd,  $J = 13.1, 9.1, 4.0$  Hz, 1H), 1.91 – 1.68 (m, 2H), 1.37 (dddd,  $J = 32.5, 13.4, 7.0, 3.4$  Hz, 2H), 1.16 (dd,  $J = 13.8, 3.5$  Hz, 1H), 0.94 (s, 3H), 0.90 (s, 6H).  $^{13}\text{C}$  NMR (101 MHz, DMSO- $d_6$ )  $\delta$  164.6, 152.8, 150.1, 139.8, 134.6, 134.2, 133.2, 131.2, 130.2, 129.6, 129.3, 127.9, 123.9, 120.9, 81.6, 60.7, 49.3, 48.1, 44.8, 36.7, 28.1, 27.4, 19.9, 19.1, 13.9. HRMS (ESI)  $m/z$ : calcd for  $\text{C}_{27}\text{H}_{30}\text{NO}_2^+$ : 400.2271; found: 400.2275.

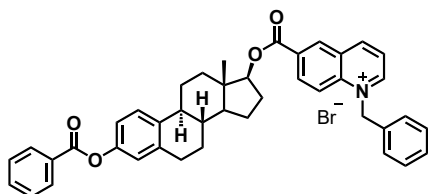

**6-(((8R,9S,13S,17S)-3-(benzoyloxy)-13-methyl-7,8,9,11,12,13,14,15,16,17-decahydro-6H-cyclopenta[a]phenanthren-17-yl)oxy)carbonyl)-1-benzylquinolin-1-ium bromide (1bx):** White solid (1643.9 mg, 88 % yield).  $^1\text{H}$  NMR (400 MHz, DMSO- $d_6$ )  $\delta$  9.93 (dd,  $J = 5.9, 1.5$  Hz, 1H), 9.63 (d,  $J = 8.4$  Hz, 1H), 9.16 (d,  $J = 1.9$  Hz, 1H), 8.67 (d,  $J = 9.4$  Hz, 1H), 8.59 (dd,  $J = 9.3, 2.0$  Hz, 1H), 8.43 (dt,  $J = 8.5, 6.0$  Hz, 1H), 8.20 – 8.04 (m, 2H), 7.74 (t,  $J = 7.4$  Hz, 1H), 7.60 (t,  $J = 7.7$  Hz, 2H), 7.45 – 7.27 (m, 6H), 7.04 – 6.92 (m, 2H), 6.46 (s, 2H), 4.95 (t,  $J = 8.2$  Hz, 1H), 2.96 – 2.76 (m, 2H), 2.42 – 2.20 (m, 3H), 2.03 – 1.83 (m, 2H), 1.74 (m, 2H), 1.44 (m, 6H), 1.00 (s, 3H).  $^{13}\text{C}$  NMR (101 MHz, DMSO- $d_6$ )  $\delta$  165.2, 164.4, 152.8, 150.1, 148.9, 142.5, 139.9, 138.3, 137.9, 134.6, 134.1, 133.2, 131.1, 130.2, 129.6, 129.5, 129.4, 128.5, 127.9, 126.9, 123.9, 122.0, 120.9, 119.4, 108.5, 84.4, 60.7, 49.4, 43.8, 43.5, 38.3, 36.8, 29.4, 27.8, 26.9, 26.1, 23.4, 12.6. HRMS (ESI)  $m/z$ : calcd for  $\text{C}_{42}\text{H}_{40}\text{NO}_2^+$ : 622.2952; found: 622.6953.

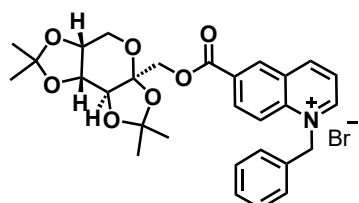

**1-benzyl-6-(((3aS,5aR,8aR,8bS)-2,2,7,7-tetramethyltetrahydro-3aH-bis ([1,3] dioxolo) [4,5-b:4',5'-d] pyran-3a-yl) methoxy) carbonyl) quinolin-1-ium bromide (1by):** White solid (1245.2 mg, 82 % yield).  $^1\text{H}$  NMR (400 MHz, Chloroform- $d$ )  $\delta$  10.78 (d,  $J = 5.7$  Hz, 1H), 9.18 (d,  $J = 8.3$  Hz, 1H), 8.91 (d,  $J = 1.8$  Hz, 1H), 8.70 (d,  $J = 9.4$  Hz, 1H), 8.63 (dd,  $J = 9.3, 1.9$  Hz, 1H), 8.39 (dd,  $J = 8.4, 5.7$  Hz, 1H), 7.44 (dd,  $J = 7.5, 2.1$  Hz, 2H), 7.32 – 7.17 (m, 3H), 6.82 (s, 2H), 4.73 (d,  $J = 11.6$  Hz, 1H), 4.64 (dd,  $J = 7.9, 2.6$  Hz, 1H), 4.39 (dd,  $J = 7.1, 4.5$  Hz, 2H), 4.25 (dd,  $J = 7.8, 1.7$  Hz, 1H), 3.92 (dd,  $J = 13.0, 1.9$  Hz, 1H), 3.78 (d,  $J = 13.0$  Hz, 1H), 1.52 (s, 3H), 1.41 (s, 3H), 1.33 (s, 6H).  $^{13}\text{C}$  NMR (101 MHz, Chloroform- $d$ )  $\delta$  163.4, 152.8, 148.6, 139.8, 135.2, 132.8, 132.7, 129.5, 129.4, 129.3, 127.7, 123.8, 120.6, 109.2, 108.9, 101.3, 70.8, 70.6, 69.9, 67.1, 61.4, 26.4, 25.9, 25.4, 24.0. HRMS (ESI)  $m/z$ : calcd for  $\text{C}_{29}\text{H}_{32}\text{NO}_7^+$ : 506.2173; found: 506.2175.

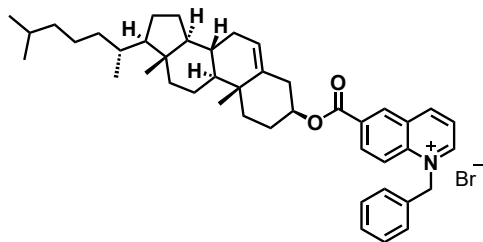

**1-benzyl-6-(((3*S*,8*S*,9*S*,10*R*,13*R*,14*S*,17*R*)-10,13-dimethyl-17-((*R*)-6-methylheptan-2-yl)-2,3,4,7,8,9,10,11,12,13,14,15,16,17-tetradecahydro-1*H*-cyclopenta[*a*]phenanthren-3-yl)oxy)carbonyl)quinolin-1-ium bromide (1bz):** White solid (1423.0 mg, 75 % yield). <sup>1</sup>H NMR (400 MHz, Chloroform-*d*) δ 10.85 (s, 1H), 9.15 (dd, *J* = 8.4, 3.6 Hz, 1H), 8.85 (d, *J* = 1.8 Hz, 1H), 8.79 – 8.56 (m, 2H), 8.31 (dd, *J* = 8.4, 5.8 Hz, 1H), 7.57 – 7.36 (m, 2H), 7.30 – 7.15 (m, 3H), 6.85 (s, 2H), 5.51 – 5.34 (m, 1H), 4.91 (t, *J* = 5.5 Hz, 1H), 2.67 – 2.34 (m, 2H), 2.11 – 1.89 (m, 4H), 1.87 – 1.65 (m, 3H), 1.64 – 0.93 (m, 22H), 0.91 (d, *J* = 6.5 Hz, 3H), 0.86 (dd, *J* = 6.7, 1.8 Hz, 6H), 0.68 (s, 3H). <sup>13</sup>C NMR (101 MHz, Chloroform-*d*) δ 163.2, 154.7, 149.6, 139.8, 139.1, 135.4, 132.7, 132.4, 129.6, 129.5, 129.4, 127.7, 125.7, 123.4, 123.3, 120.1, 61.3, 56.7, 56.2, 50.0, 42.3, 39.7, 39.5, 38.1, 36.9, 36.6, 36.2, 35.8, 31.9, 31.86, 28.2, 28.0, 27.8, 24.3, 23.8, 22.8, 22.6, 21.1, 19.3, 18.7, 11.9. HRMS (ESI) *m/z*: calcd for C<sub>44</sub>H<sub>58</sub>NO<sub>2</sub><sup>+</sup>: 632.4422; found: 632.4464.

### Characterization data for products

**3a, 4j, 4k, 4l, 4n, 4o, 4q, 4aa, 4ab** have been reported in the known literature.

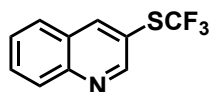

**3-((trifluoromethyl)thio) quinoline (3a):** White solid (17.2 mg, 75 % yield). <sup>1</sup>H NMR (400 MHz, Chloroform-*d*) δ 9.07 (d, *J* = 2.2 Hz, 1H), 8.56 (d, *J* = 2.2 Hz, 1H), 8.19 (dq, *J* = 8.5, 0.9 Hz, 1H), 7.98 – 7.79 (m, 2H), 7.68 (ddd, *J* = 8.1, 6.9, 1.2 Hz, 1H).

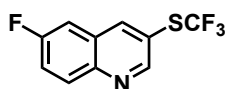

**6-fluoro-3-((trifluoromethyl)thio) quinoline (3b):** White solid (17.4mg, 70 % yield). <sup>1</sup>H NMR (400 MHz, Chloroform-*d*) δ 9.02 (d, *J* = 2.1 Hz, 1H), 8.51 (d, *J* = 2.1 Hz, 1H), 8.19 (dd, *J* = 9.3, 5.2 Hz, 1H), 7.73 – 7.59 (m, 1H), 7.52 (dd, *J* = 8.4, 2.8 Hz, 1H). <sup>13</sup>C NMR (101 MHz, Chloroform-*d*) δ 162.3, 159.8, 153.8 (d, *J* = 2.8 Hz), 145.6, 143.8 (d, *J* = 5.5 Hz), 132.2 (d, *J* = 9.2 Hz), 128.5 (q, *J* = 310.07 Hz), 122.0 (d, *J* = 25.8 Hz), 119.5, 111.1 (d, *J* = 22.2 Hz). <sup>19</sup>F NMR (376 MHz, Chloroform-*d*) δ -42.06, -110.78. HRMS (ESI) *m/z*: calcd for C<sub>10</sub>H<sub>6</sub>F<sub>4</sub>NS<sup>+</sup> [M+H]<sup>+</sup>: 248.0152. found: 248.0151.

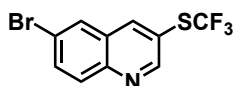

**6-bromo-3-((trifluoromethyl)thio) quinoline (3c):** White solid (18.4 mg, 60 % yield). <sup>1</sup>H NMR (400 MHz, Chloroform-*d*) δ 9.09 – 8.99 (m, 1H), 8.44 (d, *J* = 2.2 Hz, 1H), 8.07 – 8.01 (m, 2H), 7.90 (dd, *J* = 9.0, 2.2 Hz, 1H). <sup>13</sup>C NMR (101 MHz, Chloroform-*d*) δ 154.8, 147.0, 143.4, 135.1, 131.3,

130.6, 130.0, 128.8 (q,  $J=306.2$  Hz), 127.6, 121.9.  $^{19}\text{F}$  NMR (376 MHz, Chloroform-*d*)  $\delta$  -42.06. HRMS (ESI)  $m/z$ : calcd for  $\text{C}_{10}\text{H}_6\text{BrF}_3\text{NS}^+$   $[\text{M}+\text{H}]^+$ : 307.9351. found: 307.9352.

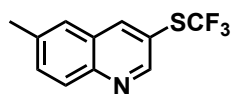

**6-methyl-3-((trifluoromethyl)thio) quinoline (3d):** White solid (18.1 mg, 74 % yield).  $^1\text{H}$  NMR (400 MHz, Chloroform-*d*)  $\delta$  8.96 (s, 1H), 8.43 (d,  $J=2.1$  Hz, 1H), 8.05 (d,  $J=8.6$  Hz, 1H), 7.66 (dd,  $J=8.5, 2.0$  Hz, 1H), 7.63 (s, 1H), 2.57 (s, 3H).  $^{13}\text{C}$  NMR (101 MHz, Chloroform-*d*)  $\delta$  153.7, 147.1, 144.1, 137.9, 134.0, 129.2 (q,  $J=308.05$  Hz), 129.2, 127.7, 126.8, 118.2, 21.6.  $^{19}\text{F}$  NMR (376 MHz, Chloroform-*d*)  $\delta$  -42.41. HRMS (ESI)  $m/z$ : calcd for  $\text{C}_{11}\text{H}_9\text{F}_3\text{NS}^+$   $[\text{M}+\text{H}]^+$ : 244.0402. found: 244.0405.

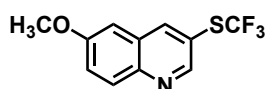

**6-methoxy-3-((trifluoromethyl)thio)quinoline (3e):** White solid (18.2 mg, 70 % yield).  $^1\text{H}$  NMR (400 MHz, Chloroform-*d*)  $\delta$  8.88 (d,  $J=2.0$  Hz, 1H), 8.41 (d,  $J=2.1$  Hz, 1H), 8.04 (d,  $J=9.2$  Hz, 1H), 7.47 (dd,  $J=9.2, 2.7$  Hz, 1H), 7.10 (d,  $J=2.8$  Hz, 1H), 3.95 (s, 3H).  $^{13}\text{C}$  NMR (101 MHz, Chloroform-*d*)  $\delta$  158.6, 152.1, 144.7, 143.2, 130.9, 129.1 (q,  $J=305.2$  Hz), 124.7, 118.6, 105.1, 55.7.  $^{19}\text{F}$  NMR (376 MHz, Chloroform-*d*)  $\delta$  -42.32. HRMS (ESI)  $m/z$ : calcd for  $\text{C}_{11}\text{H}_9\text{F}_3\text{NOS}^+$   $[\text{M}+\text{H}]^+$ : 260.0351. found: 260.0352.

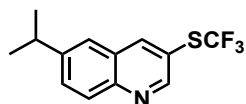

**6-isopropyl-3-((trifluoromethyl)thio)quinoline (3f):** White solid (16.3 mg, 60 % yield).  $^1\text{H}$  NMR (400 MHz, Chloroform-*d*)  $\delta$  9.00 (s, 1H), 8.50 (d,  $J=2.1$  Hz, 1H), 8.11 (d,  $J=8.7$  Hz, 1H), 7.77 (dd,  $J=8.8, 2.0$  Hz, 1H), 7.68 (d,  $J=2.1$  Hz, 1H), 3.16 (p,  $J=6.9$  Hz, 1H), 1.39 (d,  $J=6.9$  Hz, 6H).  $^{13}\text{C}$  NMR (101 MHz, Chloroform-*d*)  $\delta$  153.8, 148.7, 147.4, 144.4, 131.8, 129.3, 129.2 (q,  $J=288.1$  Hz), 127.9, 124.1, 118.1.  $^{19}\text{F}$  NMR (376 MHz, Chloroform-*d*)  $\delta$  -42.43. HRMS (ESI)  $m/z$ : calcd for  $\text{C}_{13}\text{H}_{13}\text{F}_3\text{NOS}^+$   $[\text{M}+\text{H}]^+$ : 272.0715. found: 272.0715.

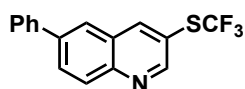

**6-phenyl-3-((trifluoromethyl)thio)quinoline (3g) :** White solid (22.0 mg, 72 % yield).  $^1\text{H}$  NMR (400 MHz, Chloroform-*d*)  $\delta$  9.03 (s, 1H), 8.57 (d,  $J=2.1$  Hz, 1H), 8.23 (d,  $J=8.8$  Hz, 1H), 8.10 (dd,  $J=8.7, 2.1$  Hz, 1H), 8.04 (d,  $J=2.1$  Hz, 1H), 7.72 (dd,  $J=7.5, 1.7$  Hz, 2H), 7.52 (dd,  $J=8.4, 6.8$  Hz, 2H), 7.49 – 7.39 (m, 1H).  $^{13}\text{C}$  NMR (101 MHz, Chloroform-*d*)  $\delta$  154.5, 147.8, 144.8, 140.7, 139.6, 131.5, 130.8, 129.9, 129.1, 129.0 (q,  $J=310.2$  Hz), 128.2, 127.5, 125.6, 118.7.  $^{19}\text{F}$  NMR (376 MHz, Chloroform-*d*)  $\delta$  -42.26. HRMS (ESI)  $m/z$ : calcd for  $\text{C}_{16}\text{H}_{11}\text{F}_3\text{NS}^+$   $[\text{M}+\text{H}]^+$ : 306.0559. found: 306.0560.

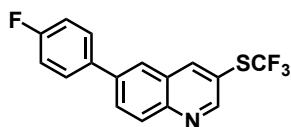

**6-(4-fluorophenyl)-3-((trifluoromethyl)thio) quinoline (3h):** White solid (27.5 mg, 85 % yield).  $^1\text{H}$  NMR (400 MHz, Chloroform-*d*)  $\delta$  9.06 (d,  $J = 2.2$  Hz, 1H), 8.60 (d,  $J = 2.2$  Hz, 1H), 8.32 – 8.23 (m, 1H), 8.12 – 8.02 (m, 2H), 7.82 (d,  $J = 8.4$  Hz, 2H), 7.78 (d,  $J = 8.5$  Hz, 2H).  $^{13}\text{C}$  NMR (101 MHz, Chloroform-*d*)  $\delta$  163.0 (d,  $J = 248.2$  Hz), 154.5, 147.7, 144.7, 139.7, 135.8 (d,  $J = 3.3$  Hz), 131.3, 130.1, 129.4 (q,  $J = 259.7$  Hz), 129.1 (d,  $J = 8.2$  Hz), 128.0, 127.7, 125.5, 116.1 (d,  $J = 21.6$  Hz).  $^{19}\text{F}$  NMR (376 MHz, Chloroform-*d*)  $\delta$  -42.24, -114.01. HRMS (ESI)  $m/z$ : calcd for  $\text{C}_{16}\text{H}_{10}\text{F}_4\text{NS}^+$   $[\text{M}+\text{H}]^+$ :324.0465. found: 324.0465.

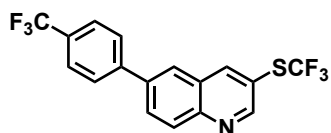

**6-(4-(trifluoromethyl)phenyl)-3-((trifluoromethyl)thio)quinoline (3i):** White solid (33.2 mg, 89 % yield).  $^1\text{H}$  NMR (400 MHz, Chloroform-*d*)  $\delta$  9.06 (d,  $J = 2.2$  Hz, 1H), 8.60 (d,  $J = 2.2$  Hz, 1H), 8.32 – 8.23 (m, 1H), 8.13 – 8.05 (m, 2H), 7.82 (d,  $J = 8.4$  Hz, 2H), 7.78 (d,  $J = 8.5$  Hz, 2H).  $^{13}\text{C}$  NMR (101 MHz, Chloroform-*d*)  $\delta$  154.9, 148.0, 144.8, 143.2, 139.2, 131.1, 130.6 (q,  $J = 32.6$  Hz), 130.4, 129.3 (q,  $J = 274.4$  Hz), 127.9, 127.8, 127.6, 126.2, 126.1 (q,  $J = 3.8$  Hz), 124.1 (d,  $J = 272.0$  Hz).  $^{19}\text{F}$  NMR (376 MHz, Chloroform-*d*)  $\delta$  -42.18, -62.54. HRMS (ESI)  $m/z$ : calcd for  $\text{C}_{17}\text{H}_{10}\text{F}_6\text{NS}^+$   $[\text{M}+\text{H}]^+$ :374.0433. found: 374.0434.

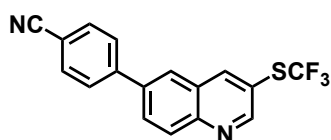

**4-(3-((trifluoromethyl)thio)quinolin-6-yl)benzotrile (3j):** White solid (26.5 mg, 80 % yield).  $^1\text{H}$  NMR (400 MHz, Chloroform-*d*)  $\delta$  9.03 (d,  $J = 2.2$  Hz, 1H), 8.56 (d,  $J = 2.2$  Hz, 1H), 8.22 (d,  $J = 8.8$  Hz, 1H), 8.04 (dd,  $J = 8.8, 2.1$  Hz, 1H), 7.99 (d,  $J = 2.1$  Hz, 1H), 7.73 – 7.62 (m, 2H), 7.21 (t,  $J = 8.6$  Hz, 2H).  $^{13}\text{C}$  NMR (101 MHz, Chloroform-*d*)  $\delta$  164.2, 161.8, 154.5, 147.7, 144.7, 139.7, 135.8 (d,  $J = 3.3$  Hz), 131.2, 130.1, 129.2, 129.1, 129.07 (q,  $J = 274.4$  Hz), 125.4, 116.2, 115.9.  $^{19}\text{F}$  NMR (376 MHz, Chloroform-*d*)  $\delta$  -42.06. HRMS (ESI)  $m/z$ : calcd for  $\text{C}_{17}\text{H}_{10}\text{F}_3\text{N}_2\text{S}^+$   $[\text{M}+\text{H}]^+$ :331.0511. found: 331.0512.

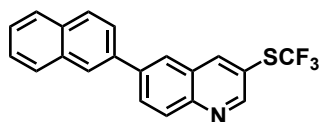

**6-(naphthalen-2-yl)-3-((trifluoromethyl)thio) quinoline (3k):** White solid (23.5 mg, 66 % yield).  $^1\text{H}$  NMR (400 MHz, Chloroform-*d*)  $\delta$  9.09 (d,  $J = 2.2$  Hz, 1H), 8.58 (d,  $J = 2.1$  Hz, 1H), 8.35 – 8.23 (m, 1H), 8.08 – 7.91 (m, 4H), 7.91 – 7.80 (m, 1H), 7.66 – 7.40 (m, 4H).  $^{13}\text{C}$  NMR (101 MHz, Chloroform-*d*)  $\delta$  154.7, 147.7, 144.7, 140.65, 138.6, 134.3, 133.8, 133.6, 131.4, 129.5 (q,  $J = 262.6$ Hz), 129.3, 128.6, 128.5, 127.9, 127.7, 127.4, 126.6, 126.1, 125.5, 125.4. HRMS (ESI)  $m/z$ : calcd for  $\text{C}_{20}\text{H}_{13}\text{F}_3\text{NS}^+$   $[\text{M}+\text{H}]^+$ :356.0715. found: 356.0716.

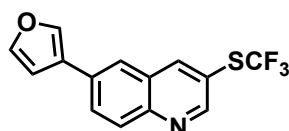

**6-(furan-3-yl)-3-((trifluoromethyl)thio) quinoline (3l):** White solid (19.2 mg, 65 % yield).  $^1\text{H}$  NMR (400 MHz, Chloroform-*d*)  $\delta$  8.99 (s, 1H), 8.51 (d,  $J = 2.1$  Hz, 1H), 8.15 (d,  $J = 8.8$  Hz, 1H), 7.97 (dd,  $J = 8.8, 2.0$  Hz, 1H), 7.93 – 7.87 (m, 2H), 7.56 (t,  $J = 1.7$  Hz, 1H), 6.84 (dd,  $J = 1.9, 0.9$  Hz, 1H).  $^{13}\text{C}$  NMR (101 MHz, Chloroform-*d*)  $\delta$  154.1, 147.7, 144.4, 144.36, 139.6, 134.1, 132.1, 130.3, 130.0, 129.2 (q,  $J = 310.67$  Hz), 128.2, 125.4, 123.6, 108.7.  $^{19}\text{F}$  NMR (376 MHz, Chloroform-*d*)  $\delta$  -42.38. HRMS (ESI)  $m/z$ : calcd for  $\text{C}_{14}\text{H}_9\text{F}_3\text{NOS}^+$   $[\text{M}+\text{H}]^+$ :296.0351. found: 296.0357.

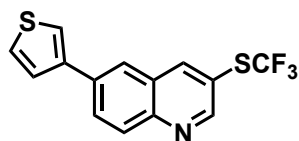

**6-(thiophen-3-yl)-3-((trifluoromethyl)thio) quinoline (3m):** White solid (23.1 mg, 74 % yield).  $^1\text{H}$  NMR (400 MHz, Chloroform-*d*)  $\delta$  9.02 (d,  $J = 2.2$  Hz, 1H), 8.56 (d,  $J = 2.2$  Hz, 1H), 8.20 (d,  $J = 8.8$  Hz, 1H), 8.12 (dd,  $J = 8.8, 2.1$  Hz, 1H), 8.06 (d,  $J = 2.0$  Hz, 1H), 7.67 (dd,  $J = 2.9, 1.4$  Hz, 1H), 7.55 (dd,  $J = 5.1, 1.4$  Hz, 1H), 7.51 (dd,  $J = 5.0, 2.9$  Hz, 1H).  $^{13}\text{C}$  NMR (101 MHz, Chloroform-*d*)  $\delta$  154.3, 147.697, 144.6, 140.8, 135.2, 130.9, 130.0, 129.2 (d,  $J = 308.8$  Hz), 128.2, 127.1, 126.2, 124.4, 122.0, 118.8.  $^{19}\text{F}$  NMR (376 MHz, Chloroform-*d*)  $\delta$  -42.38. HRMS (ESI)  $m/z$ : calcd for  $\text{C}_{14}\text{H}_9\text{F}_3\text{NS}_2^+$   $[\text{M}+\text{H}]^+$ :312.0123. found: 312.0125.

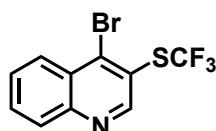

**4-bromo-3-((trifluoromethyl)thio) quinoline (3n):** White solid (6.47 mg, 21 % yield).  $^1\text{H}$  NMR (400 MHz, Chloroform-*d*)  $\delta$  9.08 (s, 1H), 8.92 (s, 1H), 8.16 (d,  $J = 8.5$  Hz, 1H), 7.95 (d,  $J = 7.5$  Hz, 1H), 7.71 (t,  $J = 8.0$  Hz, 1H).  $^{13}\text{C}$  NMR (101 MHz, Chloroform-*d*)  $\delta$  155.1, 149.2, 143.9, 131.8, 131.6, 130.6, 129.5, 129.1 (q,  $J = 308.2$  Hz), 122.0, 120.1.  $^{19}\text{F}$  NMR (376 MHz, Chloroform-*d*)  $\delta$  -42.06. HRMS (ESI)  $m/z$ : calcd for  $\text{C}_{10}\text{H}_6\text{BrF}_3\text{NS}^+$   $[\text{M}+\text{H}]^+$ :307.9351. found: 307.9353.

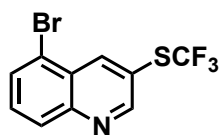

**5-bromo-3-((trifluoromethyl)thio)quinoline (3o)** : White solid (7.7 mg, 25 % yield).  $^1\text{H}$  NMR (400 MHz, Chloroform-*d*)  $\delta$  9.08 (d,  $J = 2.2$  Hz, 1H), 8.92 (d,  $J = 2.1$  Hz, 1H), 8.16 (dd,  $J = 8.6$ , 1.1 Hz, 1H), 7.95 (dd,  $J = 7.6$ , 1.1 Hz, 1H), 7.71 (dd,  $J = 8.5$ , 7.5 Hz, 1H).  $^{13}\text{C}$  NMR (101 MHz, Chloroform-*d*)  $\delta$  155.14, 149.19, 143.97, 131.80, 131.58, 129.49, 129.06 (q,  $J = 310.4$  Hz), 127.43, 122.02, 120.10.  $^{19}\text{F}$  NMR (376 MHz, Chloroform-*d*)  $\delta$  -41.96. HRMS (ESI)  $m/z$ : calcd for  $\text{C}_{10}\text{H}_6\text{BrF}_3\text{NS}^+$   $[\text{M}+\text{H}]^+$ : 307.9351. found: 307.9355.

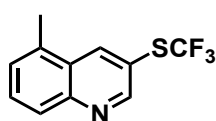

**5-methyl-3-((trifluoromethyl)thio)quinoline (3p)**: White solid (6.1 mg, 25 % yield).  $^1\text{H}$  NMR (400 MHz, Chloroform-*d*)  $\delta$  9.07 (s, 1H), 8.70 (d,  $J = 2.1$  Hz, 1H), 8.03 (d,  $J = 8.5$  Hz, 1H), 7.84 – 7.66 (m, 1H), 7.50 (d,  $J = 7.1$  Hz, 1H), 2.76 (s, 3H).  $^{13}\text{C}$  NMR (101 MHz, Chloroform-*d*)  $\delta$  154.2, 148.8, 141.4, 135.2, 131.4, 129.2 (q,  $J = 311.1$  Hz), 128.3, 127.8, 127.3, 117.9, 18.5.  $^{19}\text{F}$  NMR (376 MHz, Chloroform-*d*)  $\delta$  -42.41. HRMS (ESI)  $m/z$ : calcd for  $\text{C}_{11}\text{H}_9\text{F}_3\text{NS}^+$   $[\text{M}+\text{H}]^+$ : 244.0402. found: 244.0403.

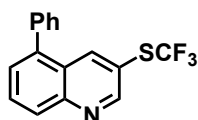

**5-phenyl-3-((trifluoromethyl)thio)quinoline (3q)**: White solid (15.3 mg, 50 % yield).  $^1\text{H}$  NMR (400 MHz, Chloroform-*d*)  $\delta$  9.05 (d,  $J = 2.1$  Hz, 1H), 8.59 (d,  $J = 2.1$  Hz, 1H), 8.18 (dt,  $J = 8.5$ , 1.1 Hz, 1H), 7.88 (dd,  $J = 8.5$ , 7.1 Hz, 1H), 7.61 (dd,  $J = 7.1$ , 1.1 Hz, 1H), 7.59 – 7.40 (m, 5H).  $^{13}\text{C}$  NMR (101 MHz, Chloroform-*d*)  $\delta$  154.4, 148.7, 143.3, 141.0, 138.4, 131.1, 129.9, 129.0 (q,  $J = 310.2$  Hz), 128.9, 128.8, 128.4, 128.2, 126.4, 118.4.  $^{19}\text{F}$  NMR (376 MHz, Chloroform-*d*)  $\delta$  -42.38. HRMS (ESI)  $m/z$ : calcd for  $\text{C}_{16}\text{H}_{11}\text{F}_3\text{NS}^+$   $[\text{M}+\text{H}]^+$ : 306.0559. found: 306.0560.

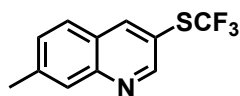

**7-methyl-3-((trifluoromethyl)thio)quinoline (3r)**: White solid (10.7 mg, 44 % yield).  $^1\text{H}$  NMR (400 MHz, Chloroform-*d*)  $\delta$  8.99 (d,  $J = 2.2$  Hz, 1H), 8.47 (d,  $J = 2.2$  Hz, 1H), 7.93 (s, 1H), 7.76 (d,  $J = 8.4$  Hz, 1H), 7.48 (dd,  $J = 8.4$ , 1.7 Hz, 1H), 2.61 (d,  $J = 1.0$  Hz, 3H).  $^{13}\text{C}$  NMR (101 MHz, Chloroform-*d*)  $\delta$  154.7, 148.7, 144.5, 142.5, 130.1, 129.2 (q,  $J = 308.1$  Hz), 128.5, 127.7, 125.9, 117.2, 22.1.  $^{19}\text{F}$  NMR (376 MHz, Chloroform-*d*)  $\delta$  -42.41. HRMS (ESI)  $m/z$ : calcd for  $\text{C}_{11}\text{H}_9\text{F}_3\text{NS}^+$   $[\text{M}+\text{H}]^+$ : 244.0402. found: 244.0403.

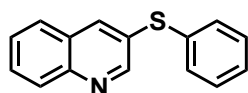

**3-(phenylthio)quinoline (4a):** White solid (22.5 mg, 95 % yield).  $^1\text{H}$  NMR (400 MHz, Chloroform-*d*)  $\delta$  8.82 (s, 1H), 8.08 (dd,  $J = 7.9, 1.5$  Hz, 2H), 7.76 – 7.64 (m, 2H), 7.54 (td,  $J = 7.2, 6.7, 1.1$  Hz, 1H), 7.44 – 7.38 (m, 2H), 7.37 – 7.27 (m, 3H).

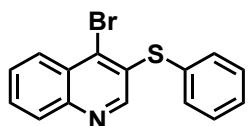

**4-bromo-3-(phenylthio)quinoline (4b) :** White solid (23.7 mg, 75 % yield).  $^1\text{H}$  NMR (400 MHz, Chloroform-*d*)  $\delta$  8.78 (d,  $J = 2.2$  Hz, 1H), 8.42 (dd,  $J = 2.3, 0.9$  Hz, 1H), 8.05 (d,  $J = 8.4$  Hz, 1H), 7.83 (dd,  $J = 7.6, 1.1$  Hz, 1H), 7.54 (dd,  $J = 8.5, 7.5$  Hz, 1H), 7.48 (dd,  $J = 8.0, 1.7$  Hz, 2H), 7.43 – 7.34 (m, 3H).  $^{13}\text{C}$  NMR (101 MHz, Chloroform-*d*)  $\delta$  152.2, 147.2, 135.3, 133.2, 132.6, 132.1, 131.0, 129.7, 129.5, 129.2, 128.3, 127.7, 121.2. HRMS (ESI)  $m/z$ : calcd for  $\text{C}_{15}\text{H}_{11}\text{BrNS}^+$   $[\text{M}+\text{H}]^+$ :315.9790. found: 315.9791.

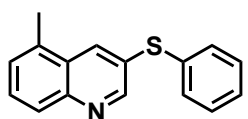

**5-methyl-3-(phenylthio)quinoline (4c):** White solid (24.2 mg, 96 % yield).  $^1\text{H}$  NMR (400 MHz, Chloroform-*d*)  $\delta$  8.81 (d,  $J = 2.2$  Hz, 1H), 8.31 (dd,  $J = 2.3, 0.9$  Hz, 1H), 7.93 (d,  $J = 8.5$  Hz, 1H), 7.59 (dd,  $J = 8.5, 7.0$  Hz, 1H), 7.42 – 7.35 (m, 3H), 7.35 – 7.27 (m, 3H), 2.62 (s, 3H).  $^{13}\text{C}$  NMR (101 MHz, Chloroform-*d*)  $\delta$  152.1, 147.0, 134.9, 134.6, 134.2, 130.8, 129.48, 129.46, 129.1, 127.8, 127.6, 127.5, 18.5. HRMS (ESI)  $m/z$ : calcd for  $\text{C}_{16}\text{H}_{14}\text{NS}^+$   $[\text{M}+\text{H}]^+$ :252.0841. found: 252.0842.

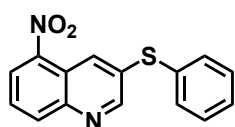

**5-nitro-3-(phenylthio)quinoline (4d):** White solid (20.7 mg, 73 % yield).  $^1\text{H}$  NMR (400 MHz, Chloroform-*d*)  $\delta$  8.80 (d,  $J = 2.2$  Hz, 1H), 8.73 (dd,  $J = 2.3, 0.9$  Hz, 1H), 8.35 (ddd,  $J = 8.4, 4.9, 1.2$  Hz, 2H), 7.71 (dd,  $J = 8.4, 7.7$  Hz, 1H), 7.60 – 7.50 (m, 2H), 7.49 – 7.40 (m, 3H).  $^{13}\text{C}$  NMR (101 MHz, Chloroform-*d*)  $\delta$  151.5, 146.2, 144.5, 136.7, 136.4, 133.6, 131.1, 130.1, 129.3, 129.2, 126.8, 125.4, 121.3. HRMS (ESI)  $m/z$ : calcd for  $\text{C}_{15}\text{H}_{11}\text{N}_2\text{O}_2\text{S}^+$   $[\text{M}+\text{H}]^+$ :283.0536. found: 283.0535.

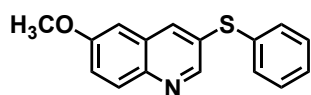

**6-methoxy-3-(phenylthio)quinoline (4e):** White solid (26.5 mg, 99 % yield). <sup>1</sup>H NMR (400 MHz, Chloroform-*d*) δ 8.66 (d, *J* = 2.2 Hz, 1H), 8.00 – 7.88 (m, 2H), 7.44 – 7.37 (m, 2H), 7.37 – 7.27 (m, 4H), 6.94 (d, *J* = 2.8 Hz, 1H). 3.90 (s, 3H) <sup>13</sup>C NMR (101 MHz, Chloroform-*d*) δ 158.3, 149.5, 142.8, 135.8, 134.4, 131.4, 130.7, 130.4, 129.5, 129.4, 127.7, 122.4, 104.7, 55.6. HRMS (ESI) *m/z*: calcd for C<sub>16</sub>H<sub>14</sub>NOS<sup>+</sup> [M+H]<sup>+</sup>:268.0791. found: 268.0798.

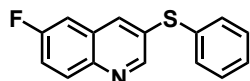

**6-fluoro-3-(phenylthio)quinoline (4f):** White solid (23.0 mg, 90 % yield). <sup>1</sup>H NMR (400 MHz, Chloroform-*d*) δ 8.73 (d, *J* = 2.3 Hz, 1H), 8.05 (dd, *J* = 9.2, 5.3 Hz, 1H), 7.90 (d, *J* = 2.3 Hz, 1H), 7.47 – 7.44 (m, 1H), 7.44 – 7.33 (m, 5H), 7.29 (dd, *J* = 8.8, 2.8 Hz, 1H). <sup>13</sup>C NMR (101 MHz, Chloroform-*d*) δ 160.9 (d, *J* = 249.2 Hz), 150.8 (d, *J* = 2.8 Hz), 143.6, 134.9 (d, *J* = 5.4 Hz), 133.2, 132.2, 132.1, 131.8 (d, *J* = 9.4 Hz), 129.7, 128.9 (d, *J* = 9.9 Hz), 128.3, 119.5 (d, *J* = 25.9 Hz), 110.2 (d, *J* = 22.1 Hz). HRMS (ESI) *m/z*: calcd for C<sub>15</sub>H<sub>11</sub>FNS<sup>+</sup> [M+H]<sup>+</sup>:256.0591. found: 256.0593.

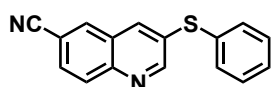

**3-(phenylthio)quinoline-6-carbonitrile (4g):** White solid (17.6 mg, 67 % yield). <sup>1</sup>H NMR (400 MHz, Chloroform-*d*) δ 8.89 (s, 1H), 8.15 (d, *J* = 8.7 Hz, 1H), 8.07 (d, *J* = 1.8 Hz, 1H), 7.92 – 7.88 (m, 1H), 7.81 (dd, *J* = 8.7, 1.8 Hz, 1H), 7.56 – 7.50 (m, 2H), 7.47 – 7.43 (m, 3H). <sup>13</sup>C NMR (101 MHz, Chloroform-*d*) δ 153.5, 147.0, 134.4, 134.1, 133.2, 133.1, 131.7, 130.8, 130.0, 129.8, 129.0, 127.6, 118.4, 111.1. HRMS (ESI) *m/z*: calcd for C<sub>16</sub>H<sub>11</sub>N<sub>2</sub>S<sup>+</sup> [M+H]<sup>+</sup>:263.0637. found: 263.0635.

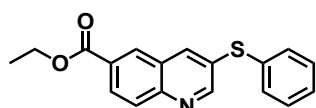

**ethyl 3-(phenylthio)quinoline-6-carboxylate (4h):** White solid (22.6 mg, 73 % yield). <sup>1</sup>H NMR (400 MHz, Chloroform-*d*) δ 8.85 (d, *J* = 2.3 Hz, 1H), 8.43 (d, *J* = 1.9 Hz, 1H), 8.25 (dd, *J* = 8.8, 1.9 Hz, 1H), 8.09 (d, *J* = 8.8, 1H), 8.04 (d, *J* = 2.3, 1H), 7.50 – 7.43 (m, 2H), 7.41 – 7.33 (m, 3H), 4.43 (q, *J* = 7.1 Hz, 2H), 1.43 (t, *J* = 7.1 Hz, 3H). <sup>13</sup>C NMR (101 MHz, Chloroform-*d*) δ 165.9, 153.4, 148.2, 136.7, 133.1, 132.3, 132.1, 130.1, 129.8, 129.6, 129.1, 128.9, 128.4, 127.5, 61.5, 14.4. HRMS (ESI) *m/z*: calcd for C<sub>18</sub>H<sub>16</sub>NO<sub>2</sub>S<sup>+</sup> [M+H]<sup>+</sup>:310.0896. found: 310.0898.

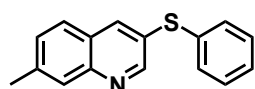

**7-methyl-3-(phenylthio)quinoline (4i):** White solid (22.2 mg, 88 % yield). <sup>1</sup>H NMR (400 MHz, Chloroform-*d*) δ 8.79 (d, *J* = 2.3 Hz, 1H), 8.07 (dd, *J* = 2.4, 0.8 Hz, 1H), 7.86 (s, 1H), 7.61 (d, *J* = 8.3



Hz, 1H), 7.42 – 7.25 (m, 6H), 2.56 (s, 3H). <sup>13</sup>C NMR (101 MHz, Chloroform-*d*) δ 152.6, 147.0, 140.2, 137.7, 135.0, 130.8, 129.6, 129.4, 128.5, 128.3, 127.4, 126.9, 126.3, 21.9. HRMS (ESI) *m/z*: calcd for C<sub>16</sub>H<sub>14</sub>NS<sup>+</sup> [M+H]<sup>+</sup>:252.0841. found: 252.0842.

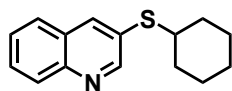

**3-(cyclohexylthio)quinoline (4j):** White solid (9.4 mg, 40 % yield). <sup>1</sup>H NMR (400 MHz, Chloroform-*d*) δ 8.89 (s, 1H), 8.17 (d, *J* = 1.4 Hz, 1H), 8.08 (d, *J* = 8.3 Hz, 1H), 7.76 (d, *J* = 8.2 Hz, 1H), 7.69 (ddd, *J* = 8.4, 6.9, 1.5 Hz, 1H), 7.55 (ddd, *J* = 8.1, 6.9, 1.2 Hz, 1H), 3.20 (tt, *J* = 10.6, 3.7 Hz, 1H), 2.06 – 1.95 (m, 2H), 1.84 – 1.77 (m, 2H), 1.66 – 1.57 (m, 1H), 1.45 – 1.23 (m, 5H).

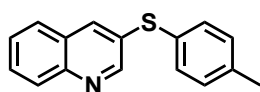

**3-(p-tolylthio)quinoline (4k):** White solid (10.0 mg, 40 % yield). White solid (33.2 mg, 89 % yield). <sup>1</sup>H NMR (400 MHz, Chloroform-*d*) δ 8.78 (d, *J* = 2.3 Hz, 1H), 8.06 (dd, *J* = 8.1, 1.1 Hz, 1H), 7.97 (dd, *J* = 2.3, 0.8 Hz, 1H), 7.73 – 7.59 (m, 2H), 7.52 (td, *J* = 7.2, 1.2 Hz, 1H), 7.35 (d, *J* = 8.2 Hz, 2H), 7.18 (d, *J* = 7.8 Hz, 2H), 2.37 (s, 3H).

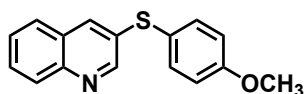

**3-((4-methoxyphenyl)thio)quinoline (4l):** White solid (9.4 mg, 35 % yield). <sup>1</sup>H NMR (400 MHz, Chloroform-*d*) δ 8.73 (d, *J* = 2.3 Hz, 1H), 8.07 – 7.99 (m, 1H), 7.83 (d, *J* = 1.1 Hz, 1H), 7.70 – 7.60 (m, 2H), 7.57 – 7.41 (m, 3H), 6.93 (d, *J* = 8.8 Hz, 2H), 3.84 (s, 3H).

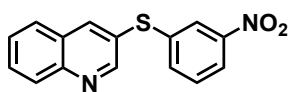

**3-((3-nitrophenyl)thio)quinoline (4m):** White solid (11.9 mg, 42 % yield). <sup>1</sup>H NMR (400 MHz, Chloroform-*d*) δ 8.88 (d, *J* = 2.2 Hz, 1H), 8.31 (dd, *J* = 2.3, 0.8 Hz, 1H), 8.21 – 8.11 (m, 2H), 8.07 (ddd, *J* = 8.1, 2.2, 1.0 Hz, 1H), 7.85 – 7.73 (m, 2H), 7.62 (ddd, *J* = 8.2, 7.0, 1.2 Hz, 1H), 7.56 (ddd, *J* = 7.9, 1.8, 1.0 Hz, 1H), 7.46 (t, *J* = 8.0 Hz, 1H). <sup>13</sup>C NMR (101 MHz, Chloroform-*d*) δ 153.1, 147.4, 140.4, 138.9, 134.8, 130.9, 130.1, 129.5, 128.3, 127.8, 127.6, 126.6, 123.9, 122.2, 121.8. HRMS (ESI) *m/z*: calcd for C<sub>15</sub>H<sub>11</sub>N<sub>2</sub>O<sub>2</sub>S<sup>+</sup> [M+H]<sup>+</sup>:283.0836. found: 283.0838.

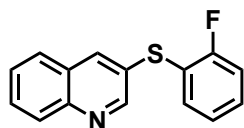

**3-((2-fluorophenyl)thio)quinoline (4n):** White solid (11.5 mg, 45 % yield).  $^1\text{H}$  NMR (400 MHz, Chloroform-*d*)  $\delta$  8.82 (s, 1H), 8.23 – 7.87 (m, 2H), 7.76 – 7.64 (m, 2H), 7.55 (ddd,  $J$  = 8.2, 7.0, 1.2 Hz, 1H), 7.40 – 7.30 (m, 2H), 7.18 – 7.07 (m, 2H).

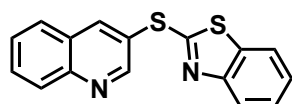

**2-(quinolin-3-ylthio)benzo[d]thiazole (4o):** White solid (19.1 mg, 65 % yield).  $^1\text{H}$  NMR (400 MHz, Chloroform-*d*)  $\delta$  9.11 (d,  $J$  = 2.3 Hz, 1H), 8.59 (d,  $J$  = 2.2 Hz, 1H), 8.26 – 8.15 (m, 1H), 7.94 – 7.78 (m, 3H), 7.73 – 7.58 (m, 2H), 7.43 (ddd,  $J$  = 8.3, 7.2, 1.3 Hz, 1H), 7.30 (ddd,  $J$  = 8.2, 7.3, 1.2 Hz, 1H).

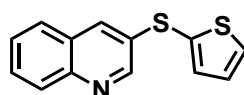

**3-(thiophen-2-ylthio)quinoline (4p):** White solid (11.5 mg, 47 % yield).  $^1\text{H}$  NMR (400 MHz, Chloroform-*d*)  $\delta$  8.80 (d,  $J$  = 2.4 Hz, 1H), 8.07 (d,  $J$  = 8.4 Hz, 1H), 7.91 (d,  $J$  = 2.3 Hz, 1H), 7.77 – 7.58 (m, 2H), 7.58 – 7.47 (m, 2H), 7.40 (dd,  $J$  = 3.6, 1.3 Hz, 1H), 7.14 (dd,  $J$  = 5.4, 3.6 Hz, 1H).  $^{13}\text{C}$  NMR (101 MHz, Chloroform-*d*)  $\delta$  149.6, 146.4, 136.4, 133.5, 132.4, 131.8, 129.8, 129.3, 129.28, 128.2, 128.16, 127.3, 127.2. HRMS (ESI)  $m/z$ : calcd for  $\text{C}_{13}\text{H}_{10}\text{NS}_2^+$   $[\text{M}+\text{H}]^+$ : 244.0249. found: 244.0250.

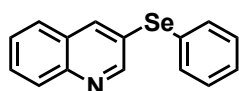

**3-(phenylselanyl)quinoline (4q) :** White solid (27.1 mg, 95 % yield).  $^1\text{H}$  NMR (400 MHz, Chloroform-*d*)  $\delta$  8.92 (d,  $J$  = 2.1 Hz, 1H), 8.25 (d,  $J$  = 2.2 Hz, 1H), 8.13 – 8.01 (m, 1H), 7.82 – 7.65 (m, 2H), 7.59 – 7.48 (m, 3H), 7.34 – 7.26 (m, 3H).

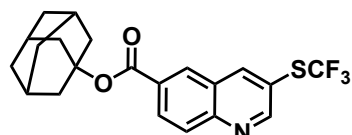

**adamantan-1-yl 3-((trifluoromethyl)thio)quinoline-6-carboxylate (5a):** White solid (24.5 mg, 60 % yield).  $^1\text{H}$  NMR (400 MHz, Chloroform-*d*)  $\delta$  9.10 (d,  $J$  = 2.3 Hz, 1H), 8.63 (d,  $J$  = 2.2 Hz, 1H), 8.55 (d,  $J$  = 1.9 Hz, 1H), 8.37 (dd,  $J$  = 8.8, 1.9 Hz, 1H), 8.17 (d,  $J$  = 8.8 Hz, 1H), 2.31 (s, 6H), 2.26 (s, 3H), 1.74 (s, 6H).  $^{13}\text{C}$  NMR (101 MHz, Chloroform-*d*)  $\delta$  164.3, 156.2, 149.9, 145.8, 131.4, 131.3, 130.6, 129.6, 129.3 (q,  $J$  = 248.6 Hz), 127.6, 126.9, 82.2, 41.5, 36.2, 30.9.  $^{19}\text{F}$  NMR (376 MHz, Chloroform-*d*)  $\delta$  -42.17. HRMS calculated for  $\text{C}_{21}\text{H}_{21}\text{F}_3\text{NO}_2\text{S}^+$   $[\text{M}+\text{H}]^+$  = 408.1240; found: 408.1241.

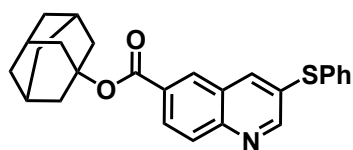

**adamantan-1-yl 3-(phenylthio)quinoline-6-carboxylate (5b):** White solid (41.2 mg, 99 % yield). <sup>1</sup>H NMR (400 MHz, Chloroform-*d*) δ 8.84 (d, *J* = 2.3 Hz, 1H), 8.36 (d, *J* = 1.8 Hz, 1H), 8.21 (dd, *J* = 8.9, 1.9 Hz, 1H), 8.06 (dd, *J* = 5.5, 3.2 Hz, 2H), 7.47 – 7.40 (m, 2H), 7.40 – 7.30 (m, 3H), 2.29 (s, 6H), 2.24 (s, 3H), 1.78 – 1.63 (m, 6H). <sup>13</sup>C NMR (101 MHz, Chloroform-*d*) δ 164.7, 153.4, 148.1, 137.1, 133.4, 132.1, 131.6, 130.8, 129.8, 129.7, 129.3, 129.1, 128.2, 127.4, 81.8, 41.4, 36.2, 30.9. HRMS calculated for C<sub>26</sub>H<sub>26</sub>NO<sub>2</sub>S<sup>+</sup> [M+H]<sup>+</sup> = 416.1679; found: 416.1680.

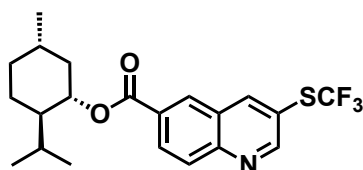

**(1S,2R,5S)-2-isopropyl-5-methylcyclohexyl 3-((trifluoromethyl)thio)quinoline-6-carboxylate (6a):** White solid (27.6 mg, 67 % yield). <sup>1</sup>H NMR (400 MHz, Chloroform-*d*) δ 9.11 (d, *J* = 2.2 Hz, 1H), 8.64 (dd, *J* = 12.1, 2.1 Hz, 2H), 8.42 (dd, *J* = 8.8, 1.9 Hz, 1H), 8.21 (d, *J* = 8.8 Hz, 1H), 5.03 (td, *J* = 10.9, 4.4 Hz, 1H), 2.21 – 2.13 (m, 1H), 1.98 (pd, *J* = 6.9, 2.8 Hz, 1H), 1.82 – 1.73 (m, 2H), 1.61 (ddt, *J* = 14.3, 11.2, 5.4 Hz, 3H), 1.21 – 1.09 (m, 2H), 0.95 (dd, *J* = 6.8, 3.0 Hz, 6H), 0.82 (d, *J* = 6.9 Hz, 3H). <sup>13</sup>C NMR (101 MHz, Chloroform-*d*) δ 165.0, 156.4, 150.0, 145.8, 131.2, 130.9, 130.4, 130.1, 129.8, 129.4 (q, *J* = 253.5 Hz), 127.0, 47.3, 40.9, 34.3, 31.5, 26.6, 23.6, 22.0, 20.8, 16.5. <sup>19</sup>F NMR (376 MHz, Chloroform-*d*) δ -42.12. HRMS calculated for C<sub>21</sub>H<sub>25</sub>F<sub>3</sub>NO<sub>2</sub>S<sup>+</sup> [M+H]<sup>+</sup> = 412.1553; found: 412.1556.

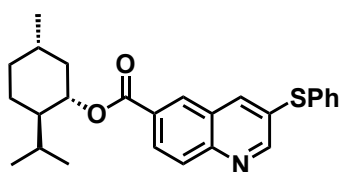

**(1S,2R,5S)-2-isopropyl-5-methylcyclohexyl 3-(phenylthio)quinoline-6-carboxylate (6b):** White solid (30.7 mg, 73 % yield). <sup>1</sup>H NMR (400 MHz, Chloroform-*d*) δ 8.86 (s, 1H), 8.43 (d, *J* = 1.9 Hz, 1H), 8.26 (dd, *J* = 8.7, 1.9 Hz, 1H), 8.13 – 8.03 (m, 2H), 7.48 – 7.42 (m, 2H), 7.40 – 7.28 (m, 3H), 5.00 (td, *J* = 10.9, 4.4 Hz, 1H), 2.20 – 2.06 (m, 1H), 1.97 (td, *J* = 7.0, 2.8 Hz, 1H), 1.82 – 1.46 (m, 5H), 1.24 – 1.06 (m, 2H), 0.94 (d, *J* = 4.7 Hz, 3H), 0.93 (d, *J* = 5.3 Hz, 3H), 0.81 (d, *J* = 6.9 Hz, 3H). <sup>13</sup>C NMR (101 MHz, Chloroform-*d*) δ 165.4, 153.4, 148.1, 136.9, 133.2, 132.2, 131.9, 130.0, 129.7, 129.5, 129.48, 129.0, 128.3, 127.5, 75.4, 47.3, 41.0, 34.3, 31.5, 26.5, 23.6, 22.0, 20.8, 16.5. HRMS calculated for C<sub>26</sub>H<sub>30</sub>NO<sub>2</sub>S<sup>+</sup> [M+H]<sup>+</sup> = 420.1992; found: 420.1995.

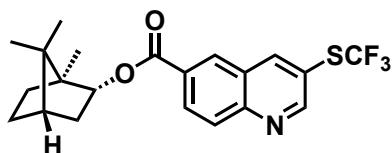

**(1S,2R,4S)-1,7,7-trimethylbicyclo[2.2.1]heptan-2-yl 3-((trifluoromethyl)thio)**

**quinoline-6-carboxylate (7a):** White solid (15.2 mg, 37 % yield). <sup>1</sup>H NMR (400 MHz, Chloroform-*d*) δ 9.12 (s, 1H), 8.67 (d, *J* = 2.2 Hz, 1H), 8.62 (d, *J* = 1.9 Hz, 1H), 8.43 (dd, *J* = 8.8, 1.9 Hz, 1H), 8.22 (d, *J* = 8.8 Hz, 1H), 5.30 – 5.11 (m, 1H), 2.59 – 2.44 (m, 1H), 2.22 – 2.14 (m, 1H), 1.95 – 1.74 (m, 2H), 1.52 – 1.42 (m, 1H), 1.36 (ddd, *J* = 12.1, 9.4, 4.3 Hz, 1H), 1.18 (dd, *J* = 13.9, 3.5 Hz, 1H), 1.00 (s, 3H), 0.96 (s, 3H), 0.95 (s, 3H). <sup>13</sup>C NMR (101 MHz, Chloroform-*d*) δ 165.8, 163.7, 156.4, 150.0, 145.8, 134.9, 131.2, 130.8, 130.2, 129.9, 128.4 (q, *J* = 278.76 Hz), 81.5, 49.2, 48.0, 44.9, 36.9, 28.1, 27.5, 19.7, 18.9, 13.7. <sup>19</sup>F NMR (376 MHz, Chloroform-*d*) δ -42.09. HRMS calculated for C<sub>21</sub>H<sub>23</sub>F<sub>3</sub>NO<sub>2</sub>S<sup>+</sup> [M+H]<sup>+</sup> = 410.1396; found: 410.1397.

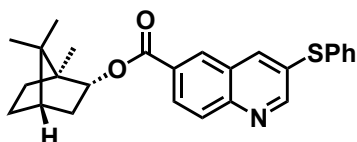

**(1S,2R,4S)-1,7,7-trimethylbicyclo[2.2.1]heptan-2-yl 3-(phenylthio)quinoline-6-**

**carboxylate (7b):** White solid (50.3 mg, 97 % yield). <sup>1</sup>H NMR (400 MHz, Chloroform-*d*) δ 8.86 (d, *J* = 2.3 Hz, 1H), 8.44 (d, *J* = 1.9 Hz, 1H), 8.27 (dd, *J* = 8.8, 1.9 Hz, 1H), 8.11 (d, *J* = 8.8 Hz, 2H), 7.45 (dd, *J* = 7.9, 1.8 Hz, 2H), 7.41 – 7.29 (m, 3H), 5.18 (ddd, *J* = 10.0, 3.5, 2.1 Hz, 1H), 2.60 – 2.37 (m, 1H), 2.16 (ddd, *J* = 13.3, 9.4, 4.4 Hz, 1H), 1.92 – 1.66 (m, 2H), 1.50 – 1.40 (m, 1H), 1.34 (ddd, *J* = 12.1, 9.4, 4.4 Hz, 1H), 1.16 (dd, *J* = 13.8, 3.5 Hz, 1H), 0.98 (s, 3H), 0.94 (s, 3H), 0.93 (s, 3H). <sup>13</sup>C NMR (101 MHz, Chloroform-*d*) δ 166.2, 153.6, 148.2, 137.1, 133.3, 132.1, 131.8, 130.0, 129.7, 129.6, 129.5, 128.9, 128.3, 127.5, 81.2, 49.2, 47.9, 45.0, 36.9, 28.1, 27.5, 19.7, 18.9, 13.7. HRMS calculated for C<sub>26</sub>H<sub>28</sub>NO<sub>2</sub>S<sup>+</sup> [M+H]<sup>+</sup> = 518.1835; found: 518.1837.

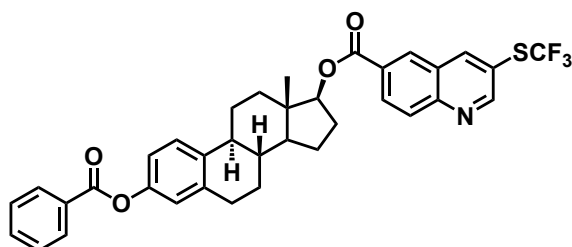

**(8R,9S,13S,17S)-3-(benzoyloxy)-13-methyl-7,8,9,11,12,13,14,15,16,17-decahydro-6H-cyclopenta[a]phenanthren-17-yl 3-((trifluoromethyl)thio)quinoline-6-**

**carboxylate (8a):** White solid (33.5 mg, 53 % yield). <sup>1</sup>H NMR (400 MHz, Chloroform-*d*) δ 9.12 (d, *J* = 2.3 Hz, 1H), 8.64 (dd, *J* = 11.6, 2.0 Hz, 2H), 8.43 (dd, *J* = 8.8, 1.9 Hz, 1H), 8.24 – 8.20 (m, 2H), 8.19 (d, *J* = 1.5 Hz, 1H), 7.69 – 7.58 (m, 1H), 7.51 (t, *J* = 7.7 Hz, 2H), 7.35 (d, *J* = 8.5 Hz, 1H), 6.98 (dd, *J* =

8.4, 2.6 Hz, 1H), 6.95 (d,  $J = 2.5$  Hz, 1H), 5.04 (dd,  $J = 9.2, 7.6$  Hz, 1H), 3.15 – 2.72 (m, 2H), 2.51 – 2.29 (m, 3H), 2.08 – 1.91 (m, 1H), 2.00 – 1.93 (m, 1H), 1.91 – 1.72 (m, 2H), 1.59 – 1.38 (m, 6H), 1.06 (s, 3H).  $^{13}\text{C}$  NMR (101 MHz, Chloroform-*d*)  $\delta$  165.5, 156.5, 148.8, 145.8, 138.2, 137.9, 137.8, 137.5, 133.5, 131.2, 130.9, 130.2, 129.99, 129.9, 129.7, 129.3 (q,  $J = 250.48$  Hz), 128.5, 127.0, 126.5, 121.7, 118.8, 83.9, 49.9, 44.0, 43.5, 38.3, 37.0, 29.6, 27.8, 27.1, 26.1, 23.4, 12.5.  $^{19}\text{F}$  NMR (376 MHz, Chloroform-*d*)  $\delta$  -42.08. HRMS calculated for  $\text{C}_{36}\text{H}_{33}\text{F}_3\text{NO}_4\text{S}^+$   $[\text{M}+\text{H}]^+ = 632.2077$ ; found: 632.2078.

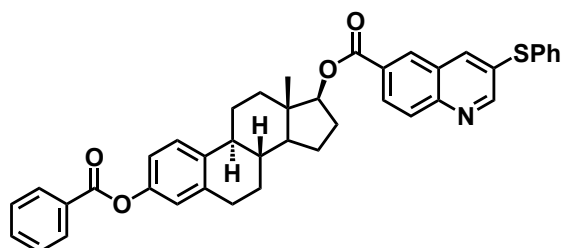

**(8R,9S,13S,17S)-3-(benzoyloxy)-13-methyl-7,8,9,11,12,13,14,15,16,17-decahydro-6H-cyclopenta[a]phenanthren-17-yl-3-(phenylthio)quinoline-6-carboxylate (8b)** : White solid (32.0 mg, 50 % yield).  $^1\text{H}$  NMR (400 MHz, Chloroform-*d*)  $\delta$  8.87 (d,  $J = 2.3$  Hz, 1H), 8.44 (d,  $J = 1.9$  Hz, 1H), 8.27 (dd,  $J = 8.8, 1.9$  Hz, 1H), 8.23 – 8.17 (m, 2H), 8.14 – 8.06 (m, 2H), 7.69 – 7.60 (m, 1H), 7.51 (t,  $J = 7.7$  Hz, 2H), 7.48 – 7.43 (m, 2H), 7.42 – 7.30 (m, 4H), 7.04 – 6.88 (m, 2H), 5.01 (dd,  $J = 9.2, 7.7$  Hz, 1H), 2.96 – 2.81 (m, 2H), 2.52 – 2.23 (m, 3H), 2.12 – 1.97 (m, 1H), 1.98 – 1.91 (m, 1H), 1.90 – 1.67 (m, 2H), 1.64 – 1.35 (m, 6H), 1.03 (s, 3H).  $^{13}\text{C}$  NMR (101 MHz, Chloroform-*d*)  $\delta$  165.9, 165.5, 153.6, 148.8, 138.2, 137.8, 136.9, 133.5, 133.2, 132.2, 130.2, 130.1, 129.8, 129.7, 129.6, 128.9, 128.5, 128.3, 126.5, 121.7, 118.7, 83.7, 49.9, 44.0, 43.4, 38.3, 37.0, 29.6, 27.8, 27.1, 26.1, 23.4, 12.5. HRMS calculated for  $\text{C}_{41}\text{H}_{38}\text{NO}_4\text{S}^+$   $[\text{M}+\text{H}]^+ = 640.2516$ ; found: 640.2520.

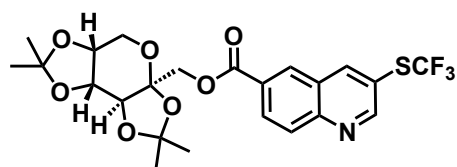

**((3aS,5aR,8aR,8bS)-2,2-dimethyltetrahydro-3aH-bis([1,3]dioxolo)[4,5-b:4',5'-d]pyran-3a-yl)methyl 3-((trifluoromethyl)thio)quinoline-6-carboxylate (9a)**: White solid (42.3 mg, 82 % yield).  $^1\text{H}$  NMR (400 MHz, Chloroform-*d*)  $\delta$  9.15 (s, 1H), 8.71 (d,  $J = 1.9$  Hz, 1H), 8.64 (d,  $J = 2.1$  Hz, 1H), 8.47 (dd,  $J = 8.8, 1.9$  Hz, 1H), 8.23 (d,  $J = 8.8$  Hz, 1H), 4.80 (d,  $J = 11.8$  Hz, 1H), 4.69 (dd,  $J = 7.9, 2.6$  Hz, 1H), 4.51 (d,  $J = 2.6$  Hz, 1H), 4.45 (d,  $J = 11.8$  Hz, 1H), 4.31 (dd,  $J = 7.9, 1.8$  Hz, 1H), 4.00 (dd,  $J = 13.1, 1.9$  Hz, 1H), 3.85 (d,  $J = 13.0$  Hz, 1H), 1.59 (s, 3H), 1.49 (s, 3H), 1.41 (s, 3H), 1.38 (s, 3H).  $^{13}\text{C}$  NMR (201 MHz, Chloroform-*d*)  $\delta$  164.9, 156.6, 150.1, 145.7, 131.4, 131.4, 131.1, 130.0, 129.2, 127.6 (q,  $J = 259.29$  Hz), 119.6, 109.2, 108.9, 101.6, 70.8, 70.7, 70.1, 66.2, 61.4, 26.5, 25.9, 25.5, 24.0.  $^{19}\text{F}$  NMR (376 MHz, Chloroform-*d*)  $\delta$  -42.12. HRMS calculated for  $\text{C}_{23}\text{H}_{25}\text{F}_3\text{NO}_7\text{S}^+$   $[\text{M}+\text{H}]^+ = 516.1298$ ; found: 516.1290.

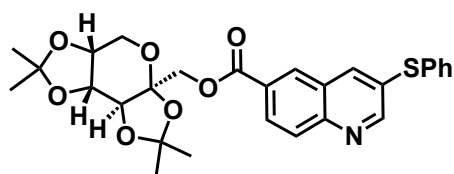

**((3aS,5aR,8aR,8bS)-2,2,7,7-tetramethyltetrahydro-3aH-bis([1,3]dioxolo)[4,5-b:4',5'-d]pyran-3a-yl)methyl 3-(phenylthio)quinoline-6-carboxylate (9b)** : White solid (30.6 mg, 58 % yield). <sup>1</sup>H NMR (400 MHz, Chloroform-*d*) δ 8.86 (s, 1H), 8.47 (d, *J* = 1.9 Hz, 1H), 8.27 (dd, *J* = 8.8, 1.9 Hz, 1H), 8.09 (d, *J* = 8.8 Hz, 1H), 8.01 (d, *J* = 2.2 Hz, 1H), 7.55 – 7.43 (m, 2H), 7.44 – 7.34 (m, 3H), 4.75 (d, *J* = 11.7 Hz, 1H), 4.65 (dd, *J* = 7.9, 2.6 Hz, 1H), 4.47 (d, *J* = 2.6 Hz, 1H), 4.38 (d, *J* = 11.7 Hz, 1H), 4.27 (dd, *J* = 8.0, 1.7 Hz, 1H), 3.96 (dd, *J* = 13.0, 1.9 Hz, 1H), 3.81 (d, *J* = 13.0 Hz, 1H), 1.55 (s, 3H), 1.45 (s, 3H), 1.36 (s, 3H), 1.35 (s, 3H). <sup>13</sup>C NMR (101 MHz, Chloroform-*d*) δ 165.3, 153.5, 148.2, 136.4, 132.8, 130.5, 129.8, 129.7, 128.9, 128.6, 128.5, 127.4, 109.2, 108.9, 101.6, 70.8, 70.7, 70.1, 65.9, 61.4, 26.5, 25.9, 25.5, 24.0. HRMS calculated for C<sub>28</sub>H<sub>30</sub>NO<sub>7</sub>S<sup>+</sup> [M+H]<sup>+</sup> = 527.1737; found: 527.1738.

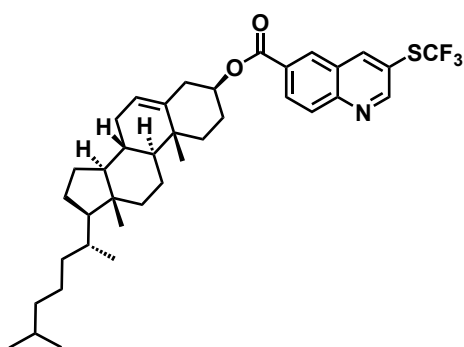

**(3S,8S,9S,10R,13R,14S,17R)-10,13-dimethyl-17-((R)-6-methylheptan-2-yl)-2,3,4,7,8,9,10,11,12,13,14,15,16,17-tetradecahydro-1H-cyclopenta[a]phenanthren-3-yl 3-((trifluoromethyl)thio)quinoline-6-carboxylate (10a)**: White solid (57.8 mg, 90 % yield). <sup>1</sup>H NMR (400 MHz, Chloroform-*d*) δ 9.11 (s, 1H), 8.63 (dd, *J* = 5.1, 2.1 Hz, 2H), 8.42 (dd, *J* = 8.9, 1.9 Hz, 1H), 8.20 (d, *J* = 8.8 Hz, 1H), 5.45 (d, *J* = 5.0 Hz, 1H), 5.09 – 4.72 (m, 1H), 2.64 – 2.38 (m, 2H), 2.12 – 1.69 (m, 7H), 1.69 – 1.16 (m, 18H), 1.09 (s, 3H), 1.06 – 1.01 (m, 1H), 0.93 (d, *J* = 6.5 Hz, 3H), 0.88 (d, *J* = 1.8 Hz, 3H), 0.86 (d, *J* = 1.8 Hz, 3H), 0.70 (s, 3H). <sup>13</sup>C NMR (101 MHz, Chloroform-*d*) δ 164.9, 156.3, 150.0, 149.9, 145.7, 139.4, 131.2, 130.9, 130.1, 129.8, 129.5 (q, *J* = 254.5 Hz), 127.0, 123.1, 75.5, 56.7, 56.2, 50.1, 42.3, 39.7, 39.5, 38.2, 37.0, 36.7, 36.2, 35.8, 31.96, 31.9, 28.2, 28.0, 27.9, 24.3, 23.8, 22.8, 22.6, 21.1, 19.4, 18.7, 11.9. <sup>19</sup>F NMR (376 MHz, Chloroform-*d*) δ -42.12. HRMS calculated for C<sub>38</sub>H<sub>51</sub>F<sub>3</sub>NO<sub>2</sub>S<sup>+</sup> [M+H]<sup>+</sup> = 642.3587; found: 642.3591.

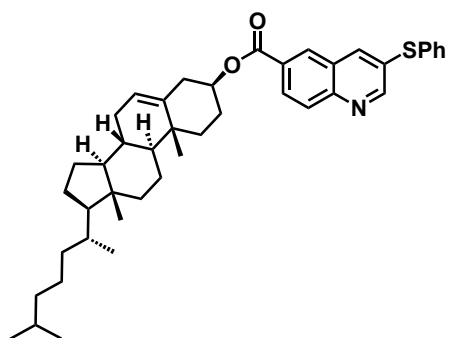

**(3S,8S,9S,10R,13R,14S,17R)-10,13-dimethyl-17-((R)-6-methylheptan-2-yl)-2,3,4,7,8,9,10,11,12,13,14,15,16,17-tetradecahydro-1H-cyclopenta[a]phenanthren-3-yl 3-(phenylthio)quinoline-6-carboxylate (10b) :**

White solid (39.7 mg, 61 % yield). <sup>1</sup>H NMR (400 MHz, Chloroform-*d*) δ 8.86 (s, 1H), 8.42 (d, *J* = 1.9 Hz, 1H), 8.26 (dd, *J* = 8.7, 1.9 Hz, 1H), 8.09 (d, *J* = 8.8 Hz, 1H), 8.05 (d, *J* = 2.3 Hz, 1H), 7.46 (dd, *J* = 7.9, 1.9 Hz, 2H), 7.41 – 7.34 (m, 3H), 5.52 – 5.25 (m, 1H), 5.01 – 4.78 (m, 1H), 2.50 (d, *J* = 7.9 Hz, 2H), 2.17 – 1.71 (m, 7H), 1.68 – 1.10 (m, 18H), 1.08 (s, 3H), 1.04 – 0.97 (m, 1H), 0.92 (d, *J* = 6.5 Hz, 3H), 0.88 (d, *J* = 1.8 Hz, 3H), 0.86 (d, *J* = 1.8 Hz, 3H), 0.69 (s, 3H). <sup>13</sup>C NMR (101 MHz, Chloroform-*d*) δ 165.3, 153.4, 139.5, 136.7, 133.1, 132.3, 131.9, 130.5, 130.4, 130.0, 129.8, 129.5, 128.9, 128.4, 127.5, 122.9, 75.2, 56.7, 56.1, 50.1, 42.3, 39.7, 39.5, 38.2, 37.0, 36.7, 36.2, 35.8, 31.95, 31.9, 28.2, 28.0, 27.9, 24.3, 23.8, 22.8, 22.6, 21.1, 19.4, 18.7, 11.9. HRMS calculated for C<sub>43</sub>H<sub>56</sub>NO<sub>2</sub>S<sup>+</sup> [M+H]<sup>+</sup> = 650.4026; found: 650.4027.

## 5. Spectra

$^1\text{H}$  NMR of **1a**

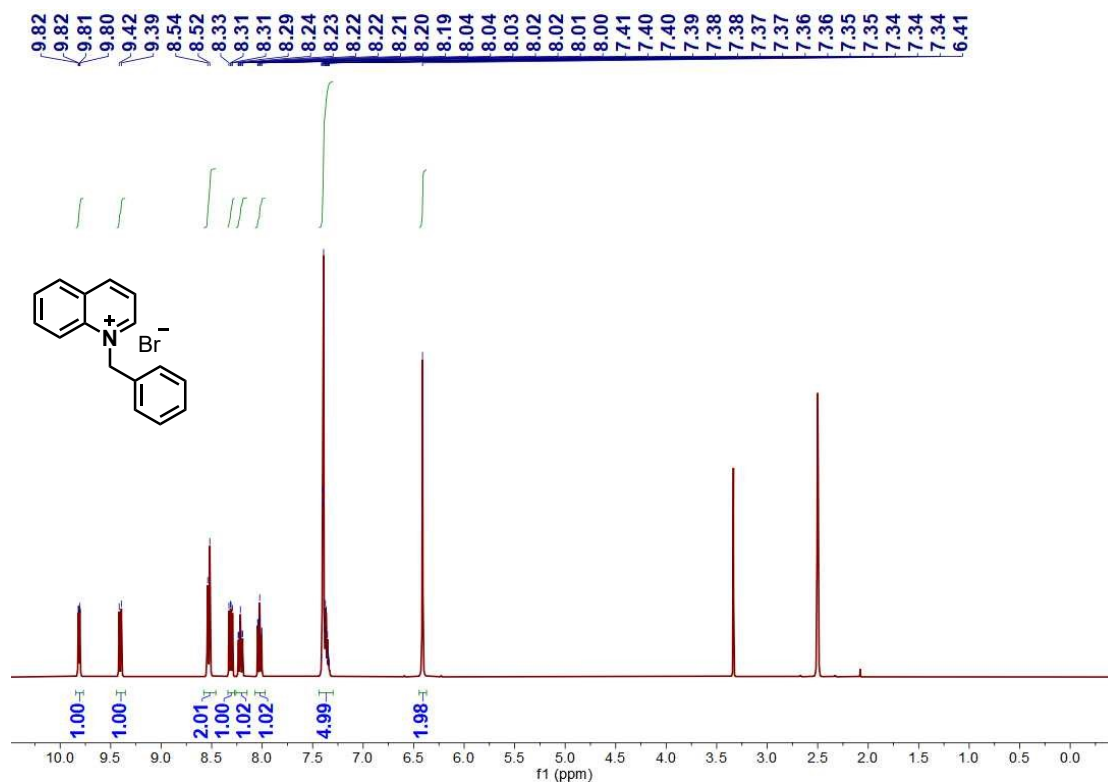

$^1\text{H}$  NMR of **1b**

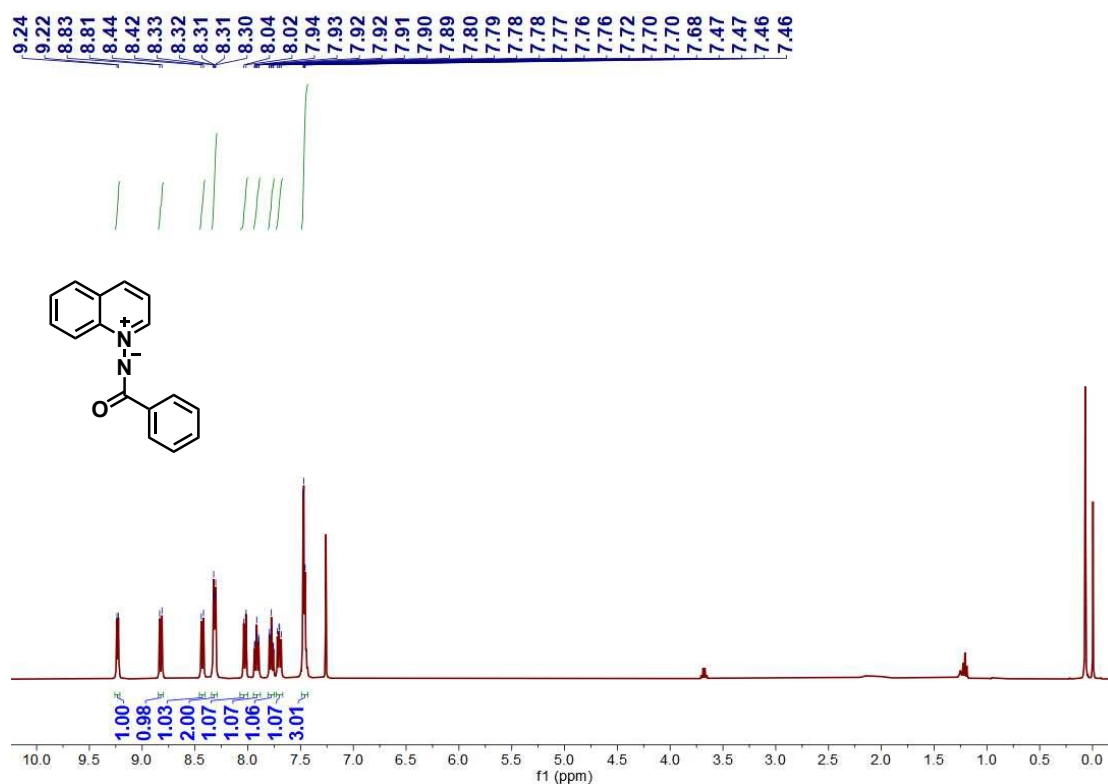



<sup>1</sup>H NMR of **1c**

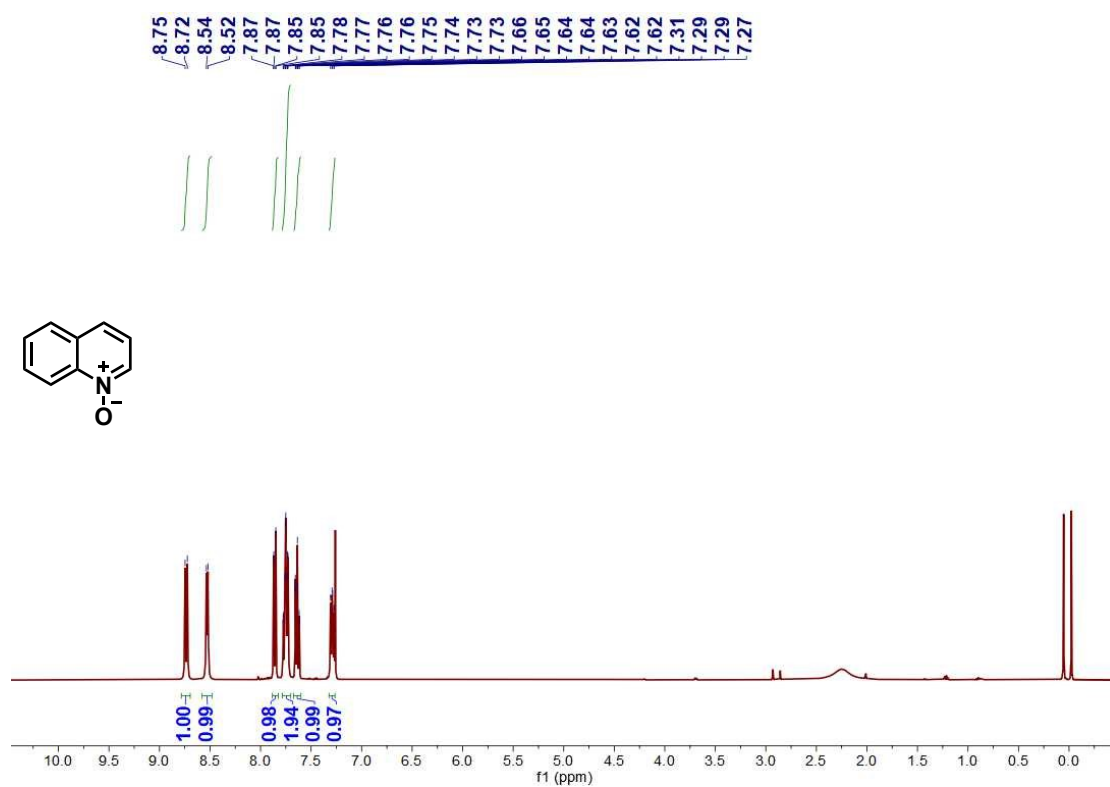

<sup>1</sup>H NMR of **1d**

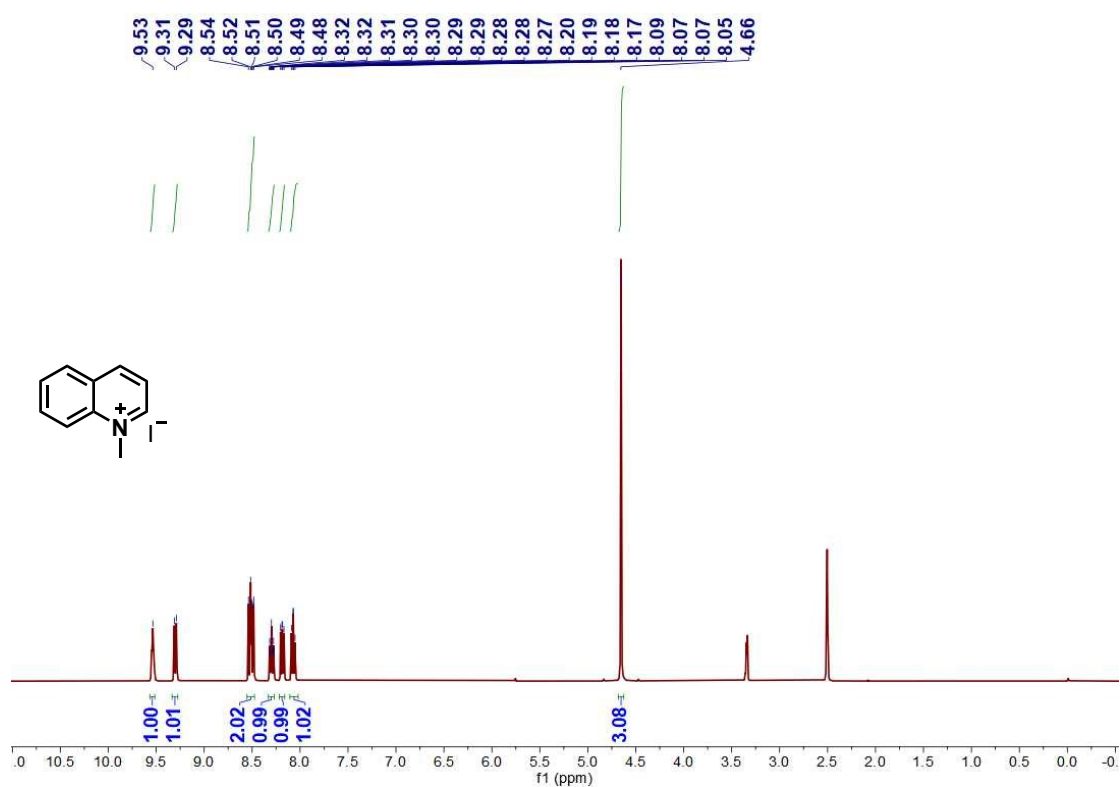

<sup>1</sup>H NMR and <sup>13</sup>C NMR of **1ab**

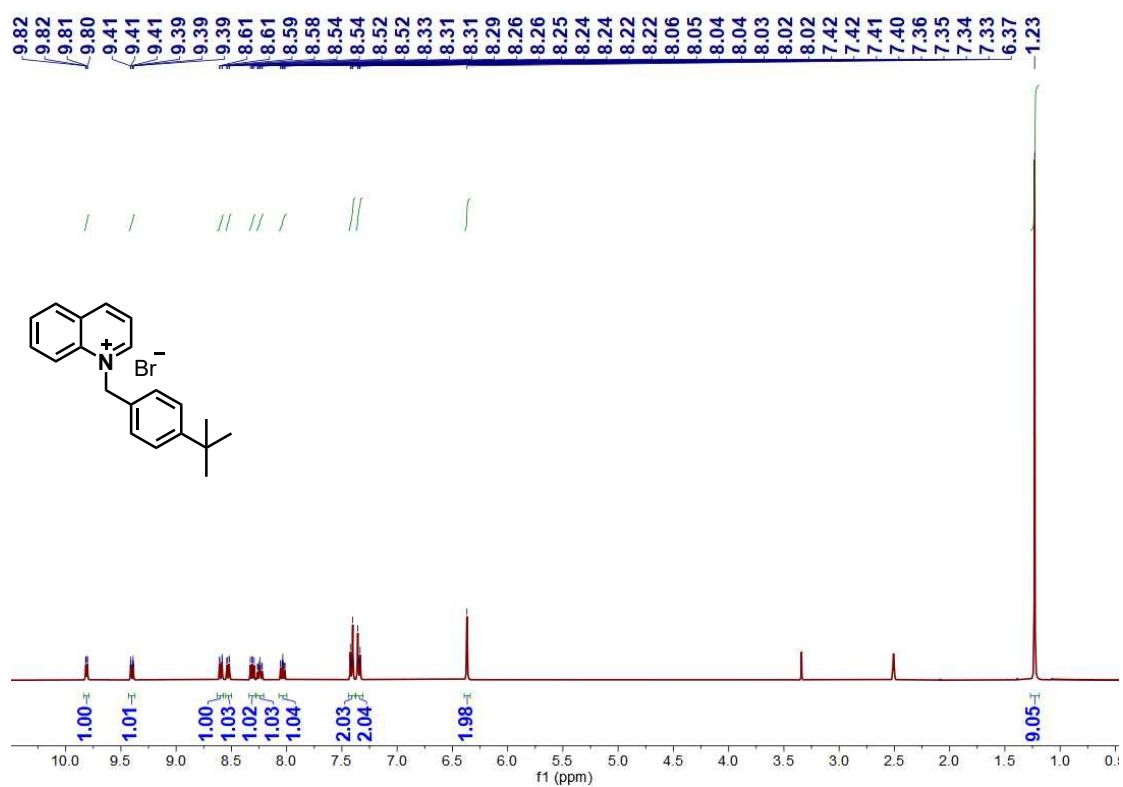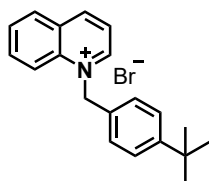

151.77  
150.76  
148.57  
138.02  
136.26  
131.43  
131.34  
130.46  
130.38  
127.73  
126.32  
122.94  
119.82

59.97

34.81  
31.42

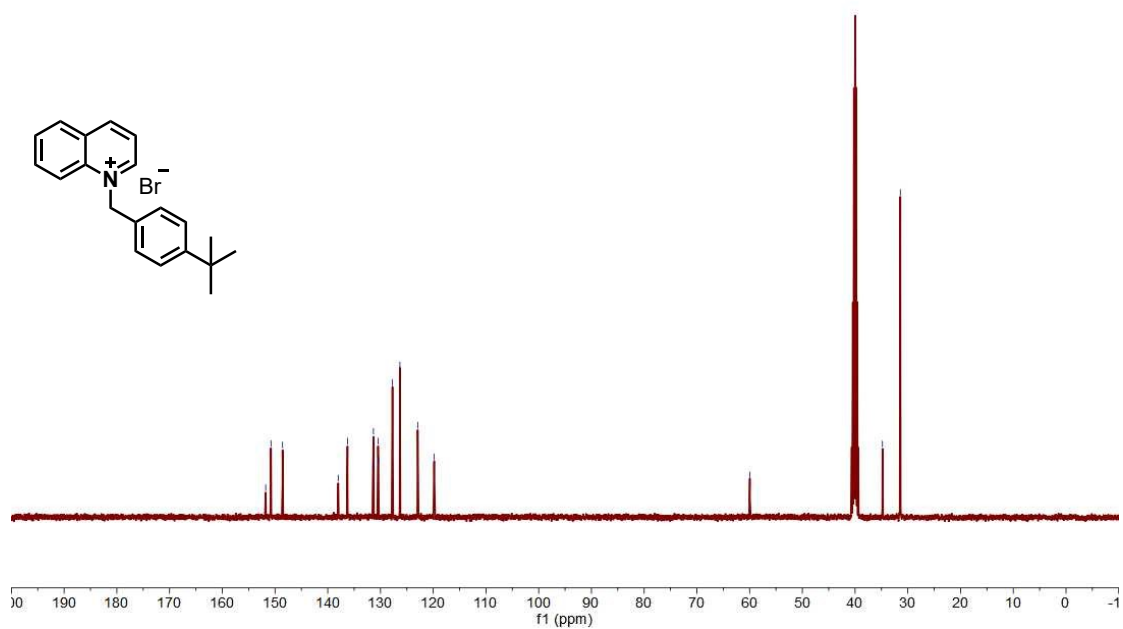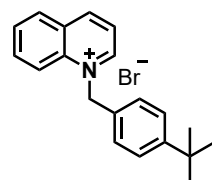

<sup>1</sup>H NMR and <sup>13</sup>C NMR of **1ac**

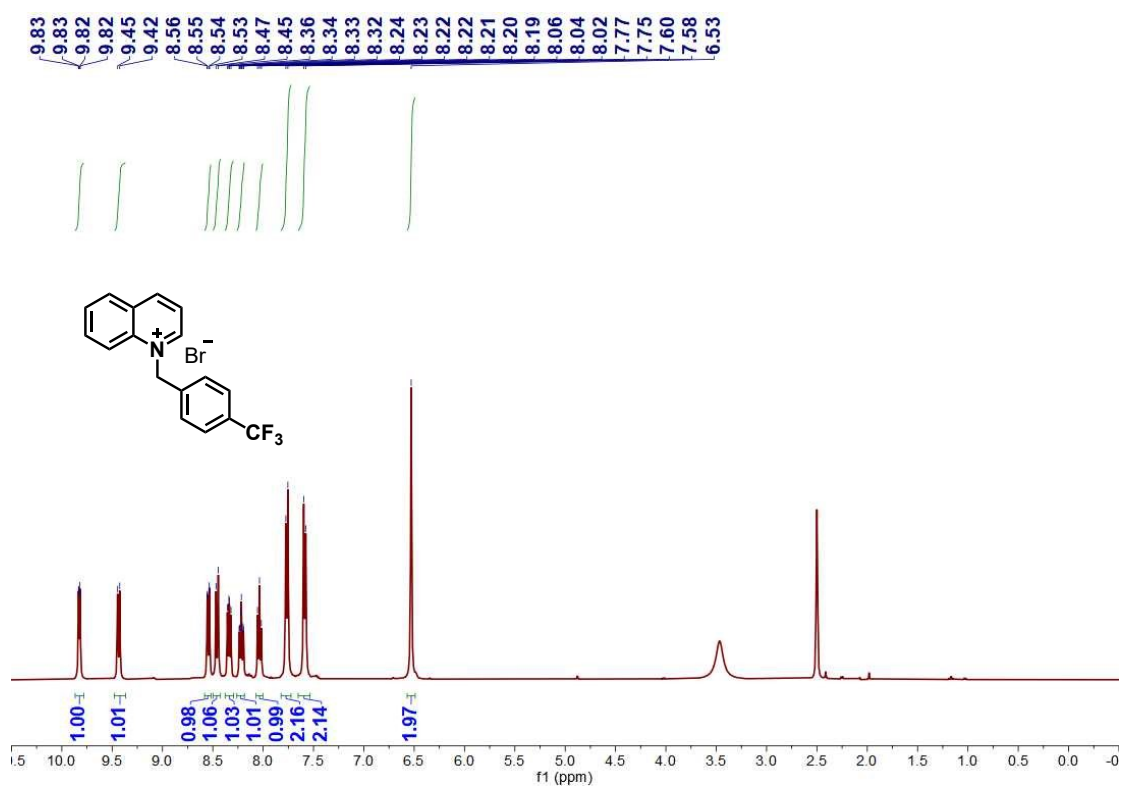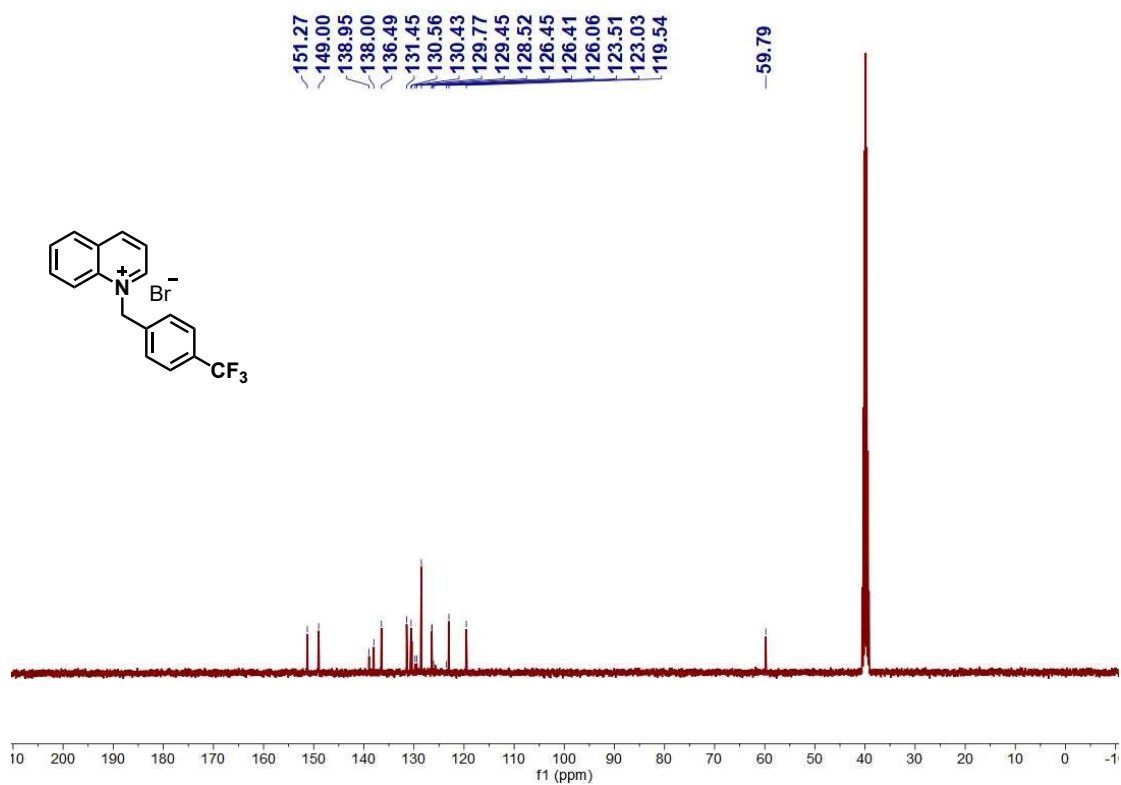

<sup>1</sup>H NMR and <sup>13</sup>C NMR of **1ad**

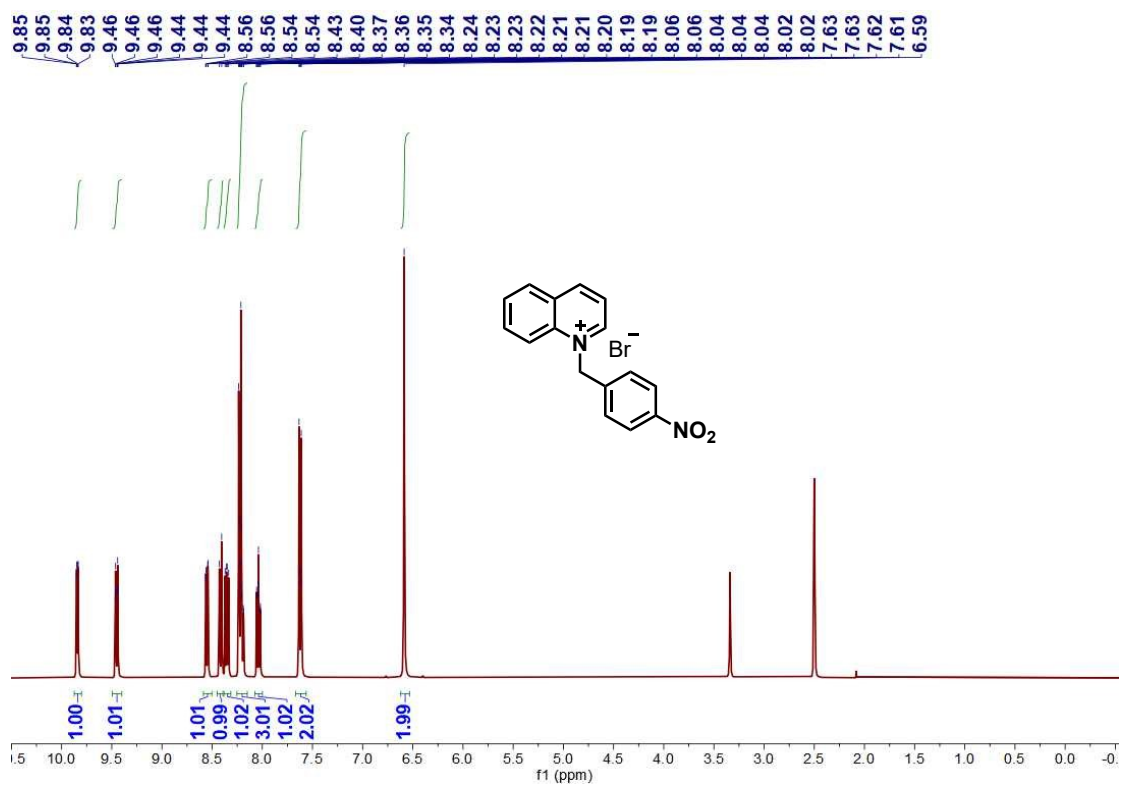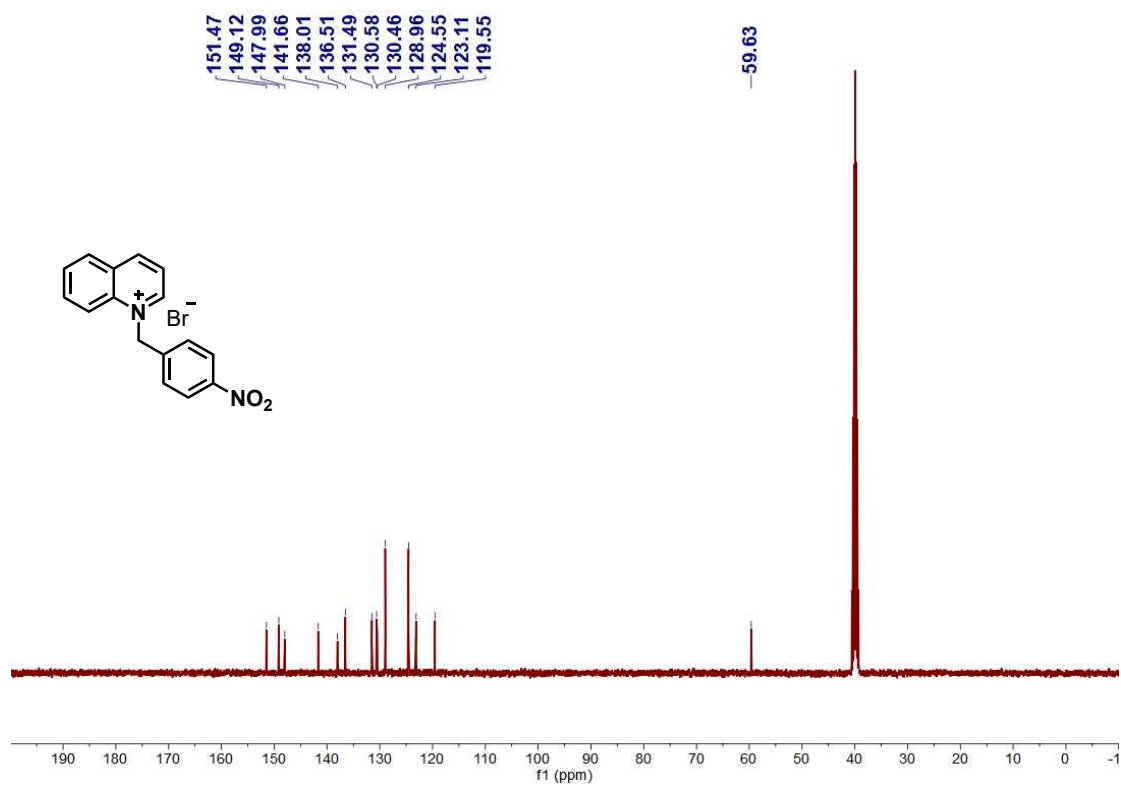

<sup>1</sup>H NMR of **1ac**

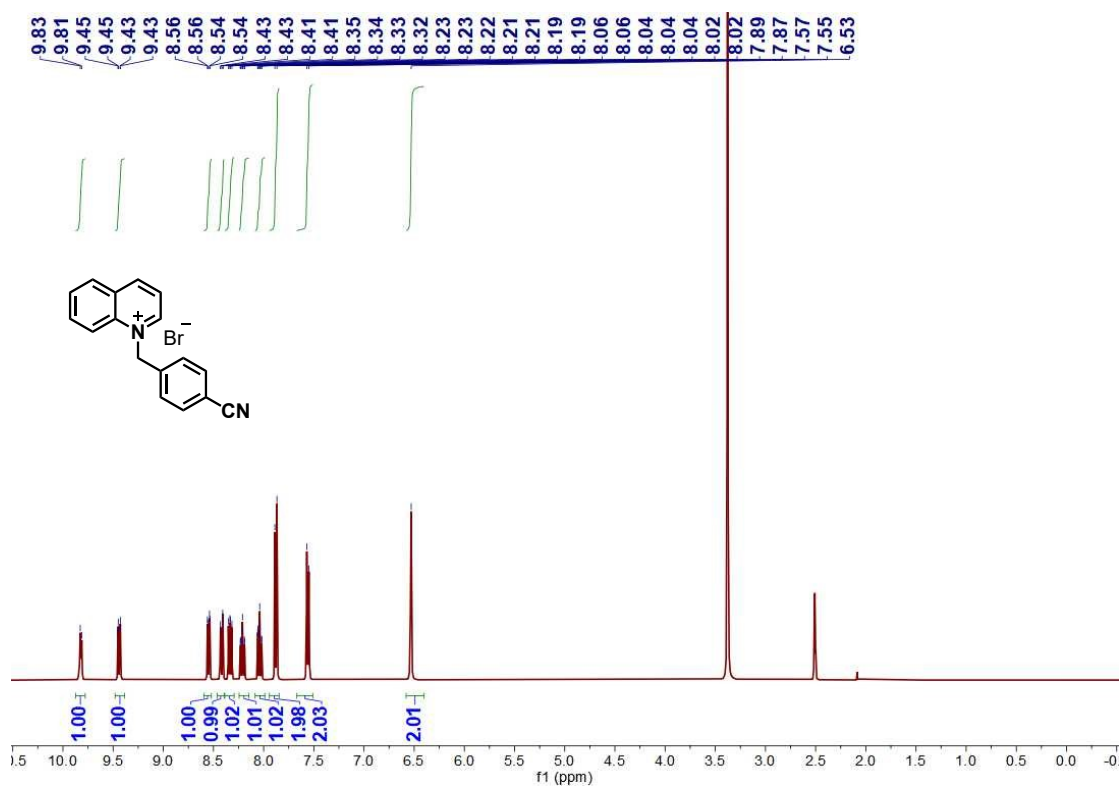

<sup>1</sup>H NMR and <sup>13</sup>C NMR of **1af**

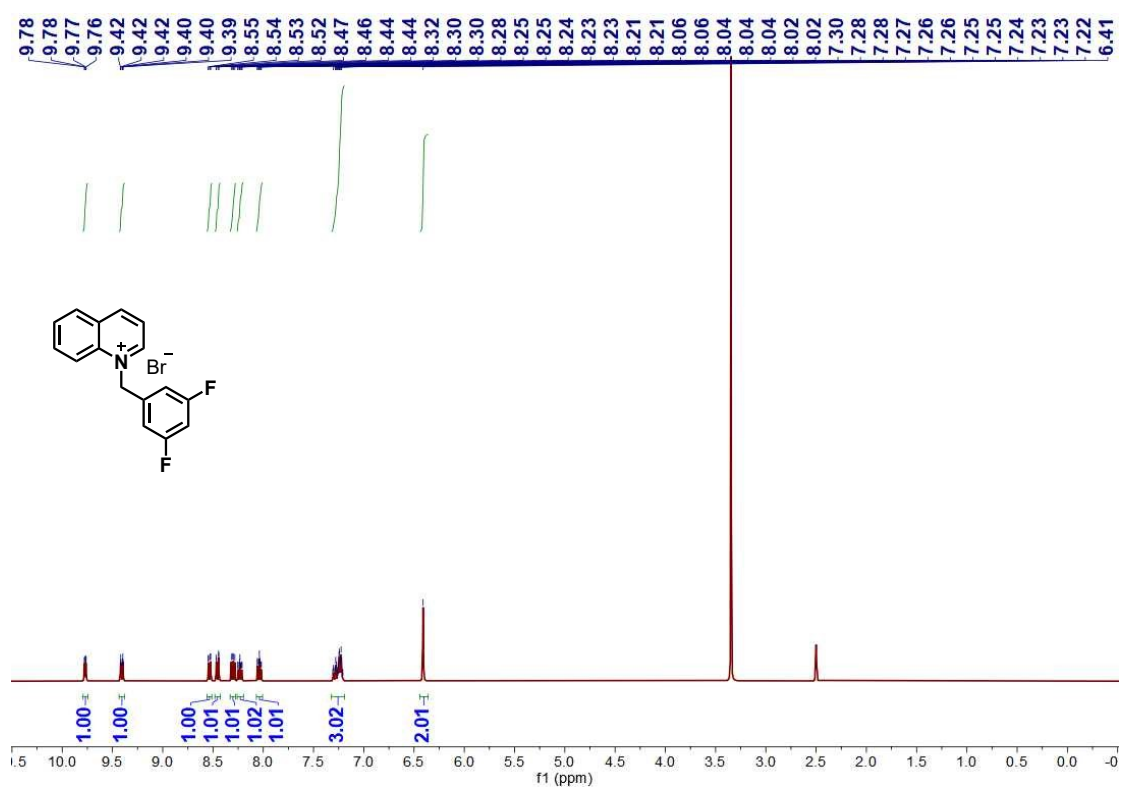

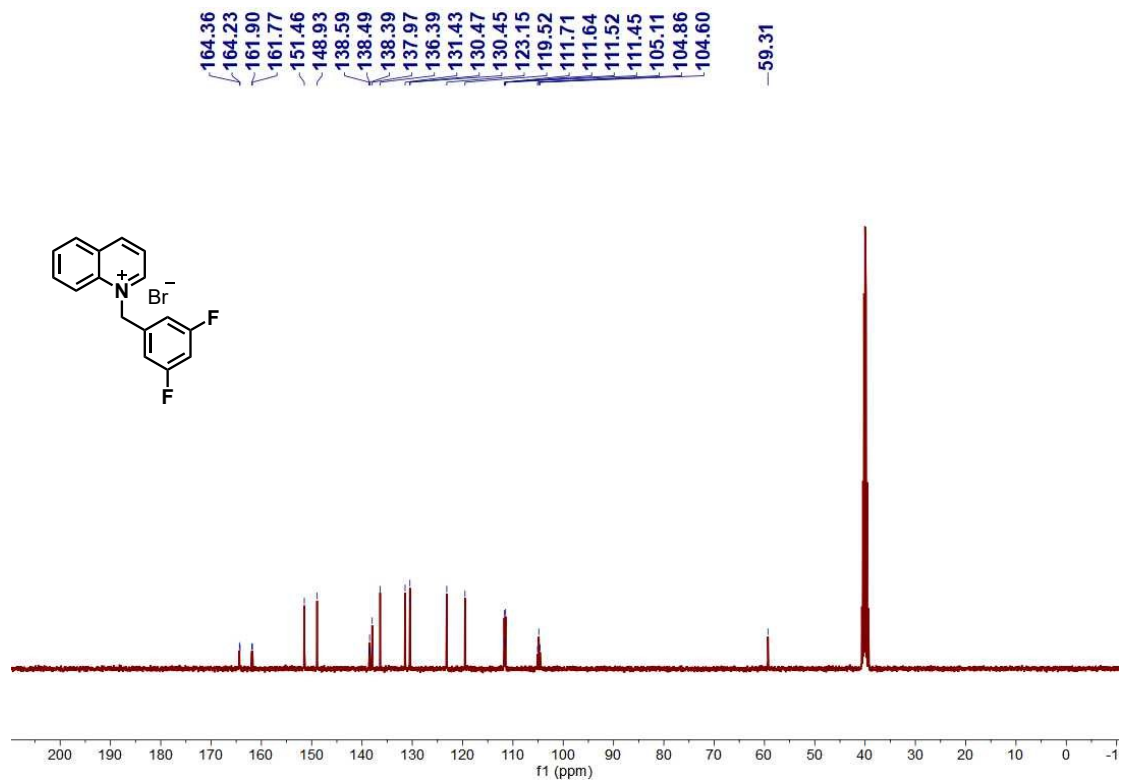

$^1\text{H}$  NMR of **1ag**

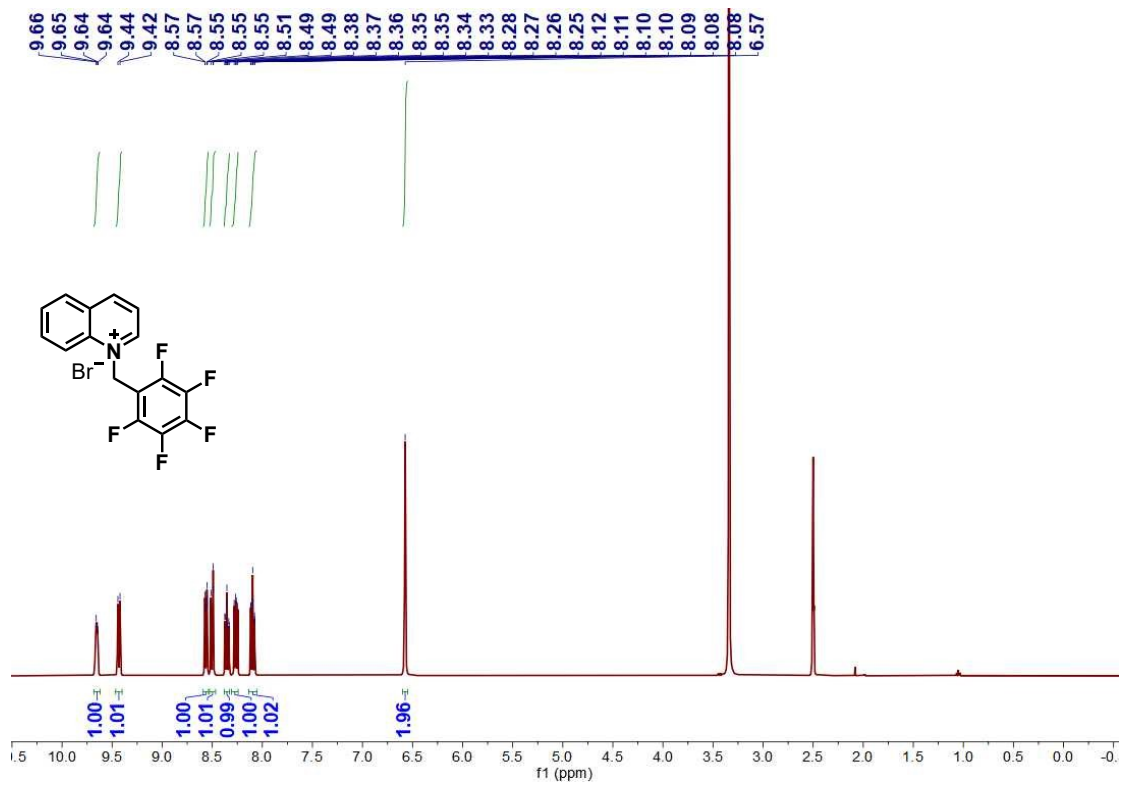

<sup>1</sup>H NMR and <sup>13</sup>C NMR of **1ah**

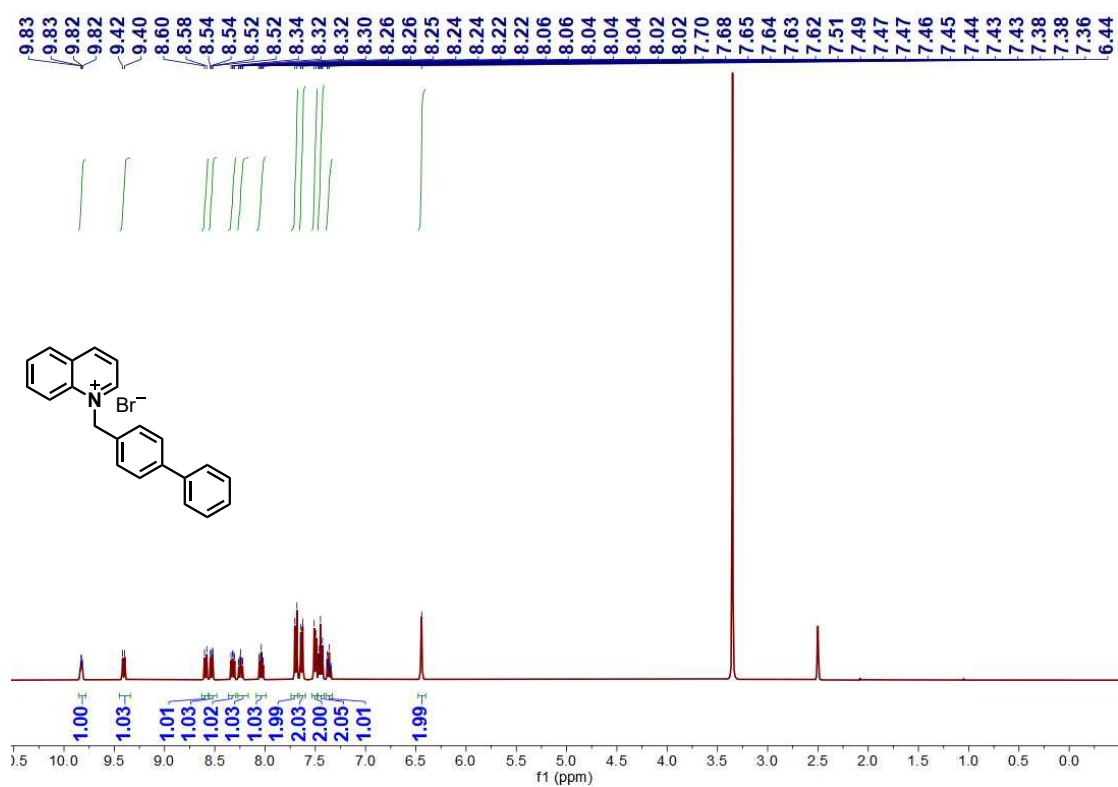

<sup>1</sup>H NMR and <sup>13</sup>C NMR of **1ai**

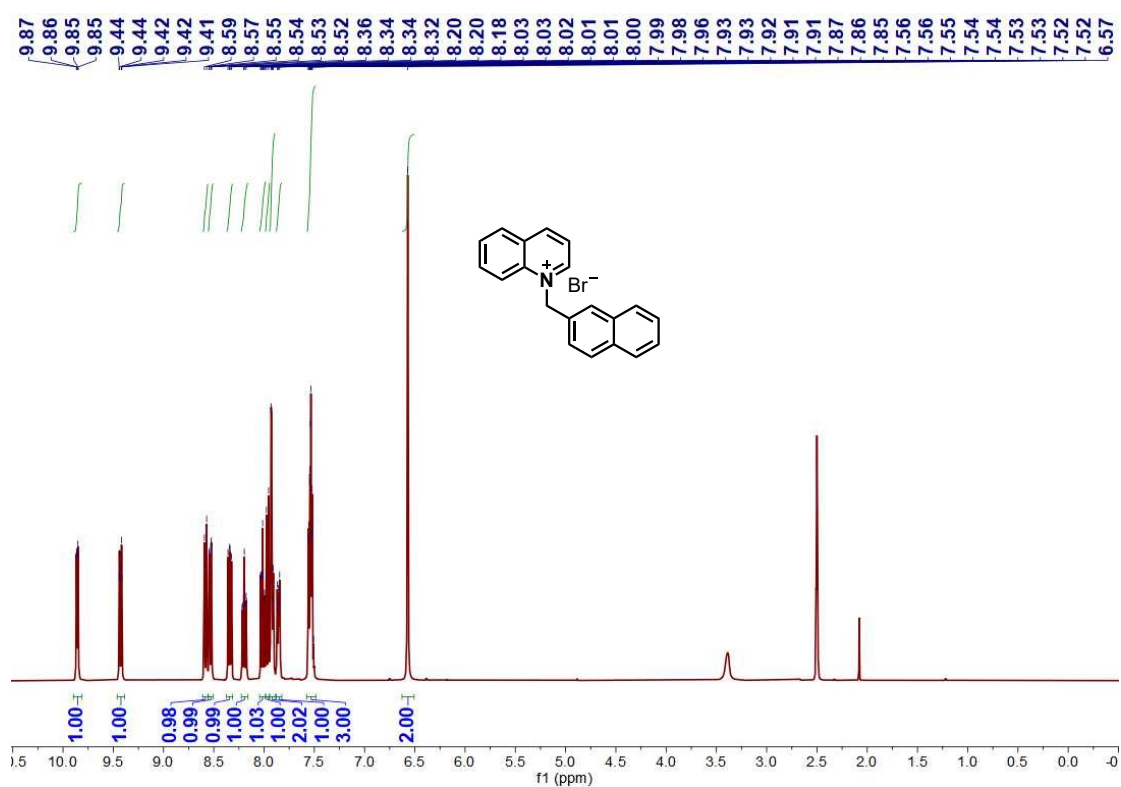

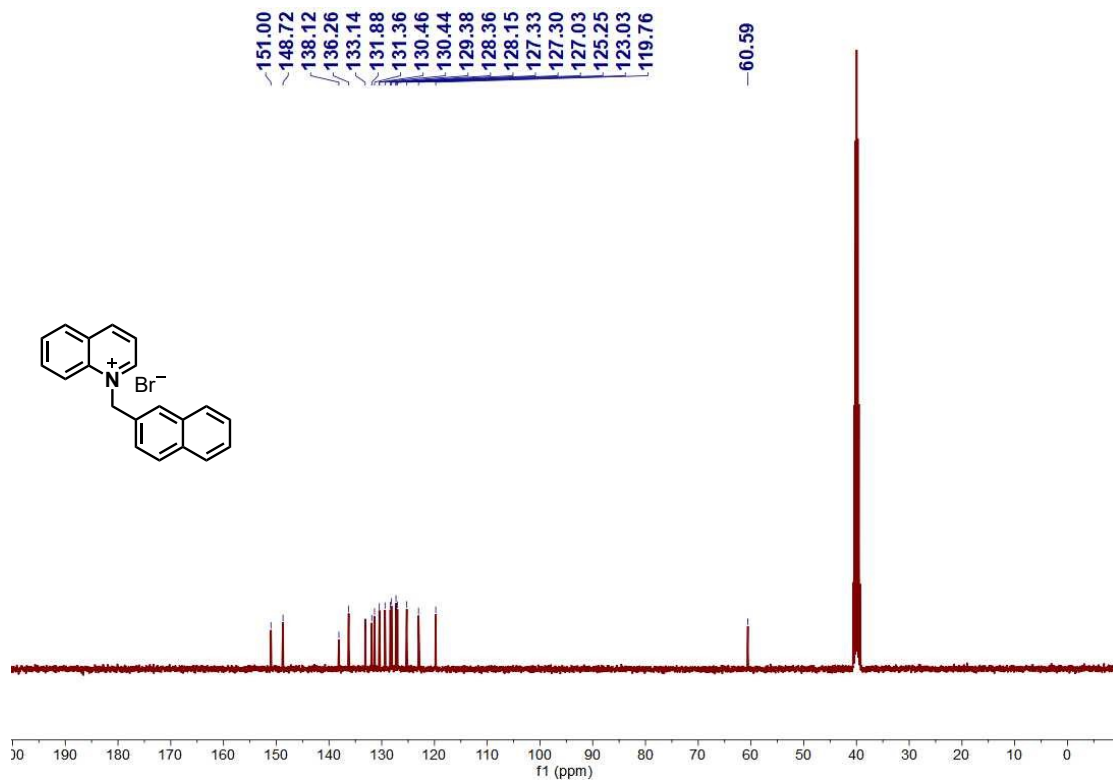

<sup>1</sup>H NMR and <sup>13</sup>C NMR of **1aj**

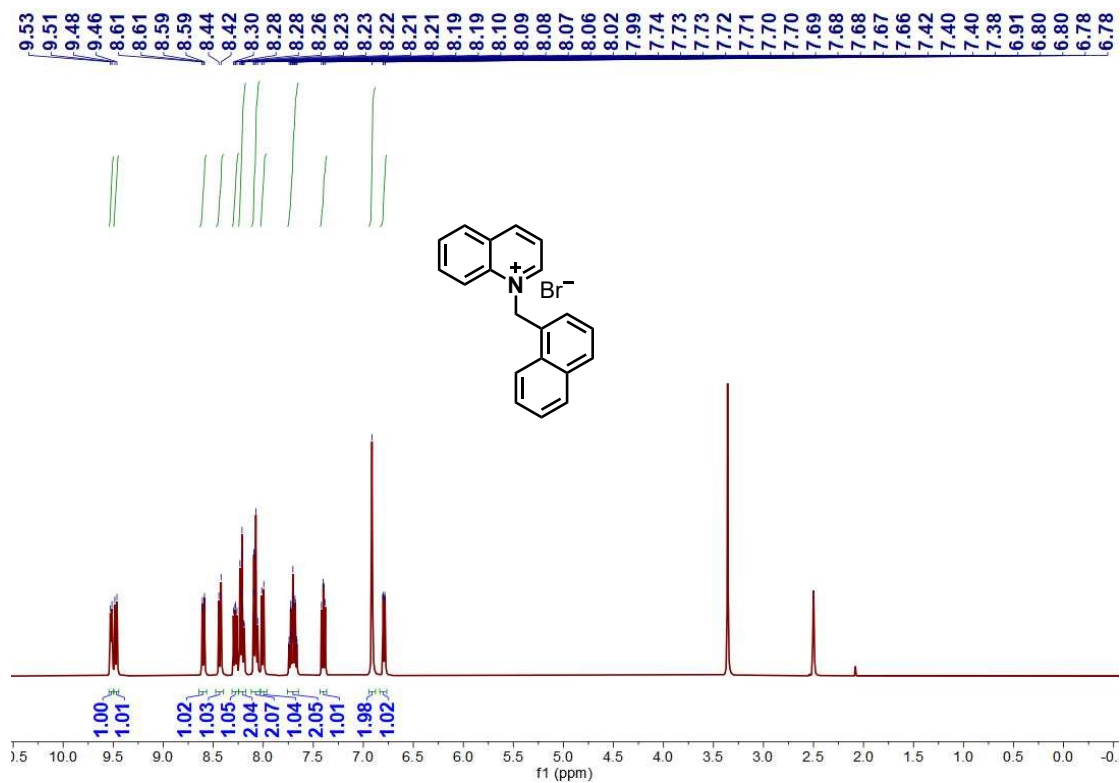



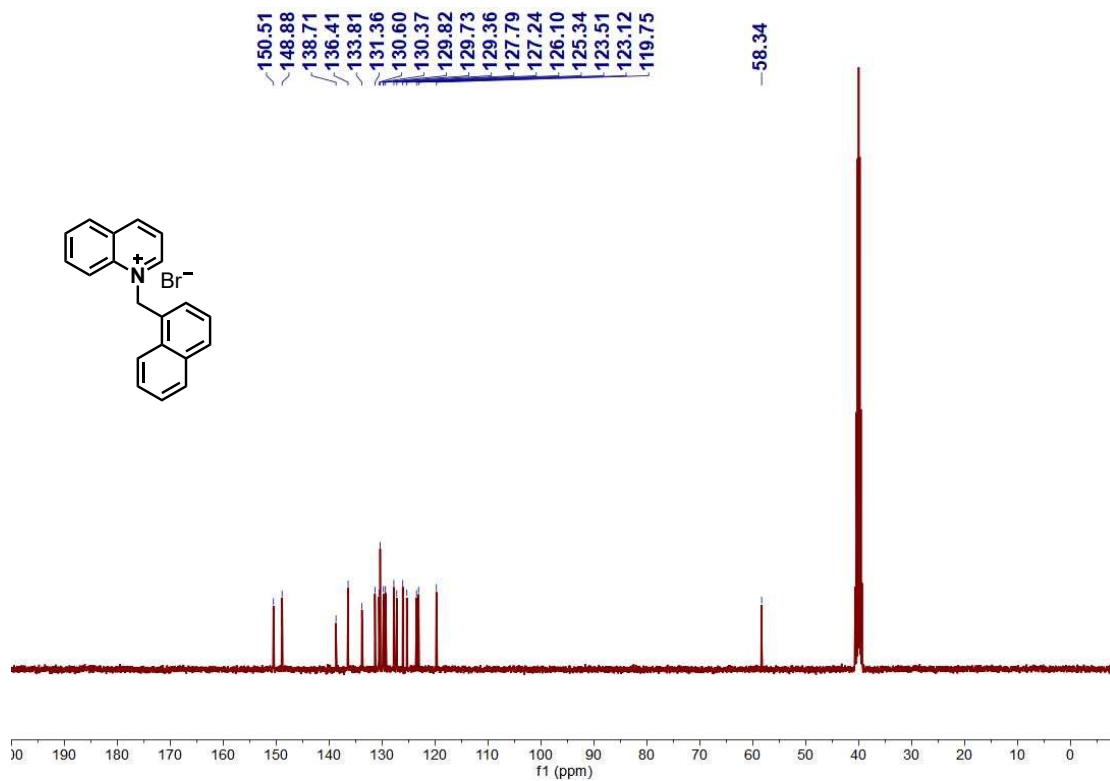

<sup>1</sup>H NMR and <sup>13</sup>C NMR of **1ak**

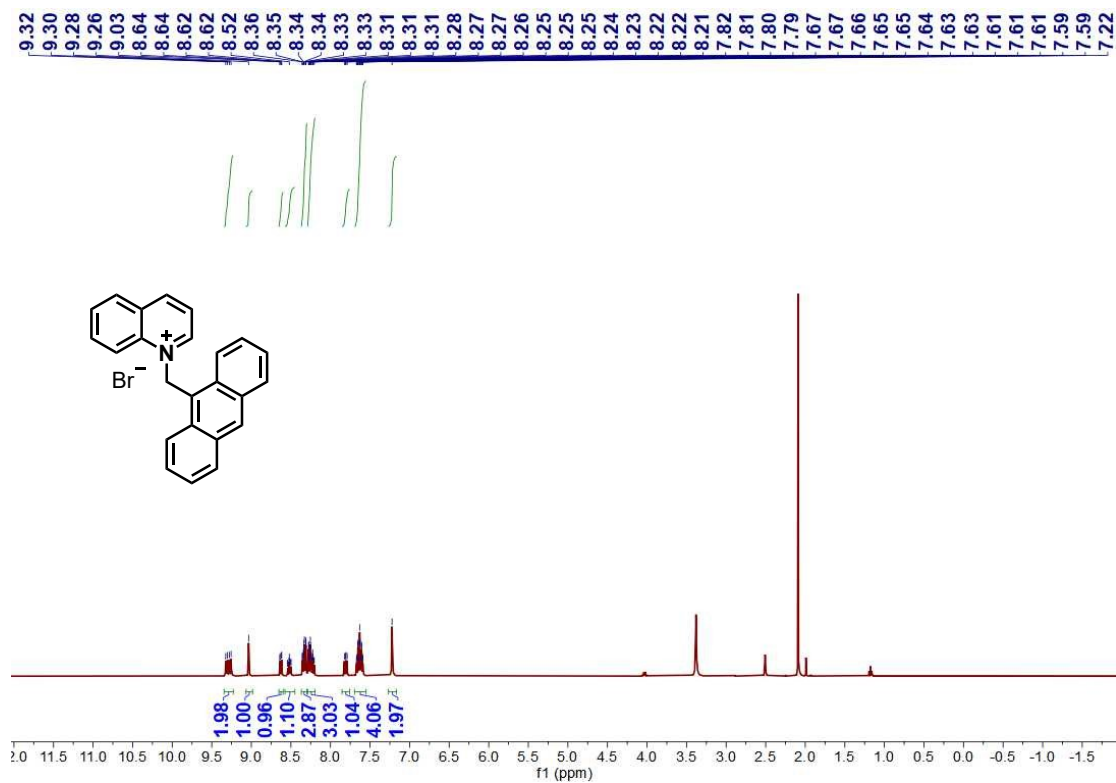

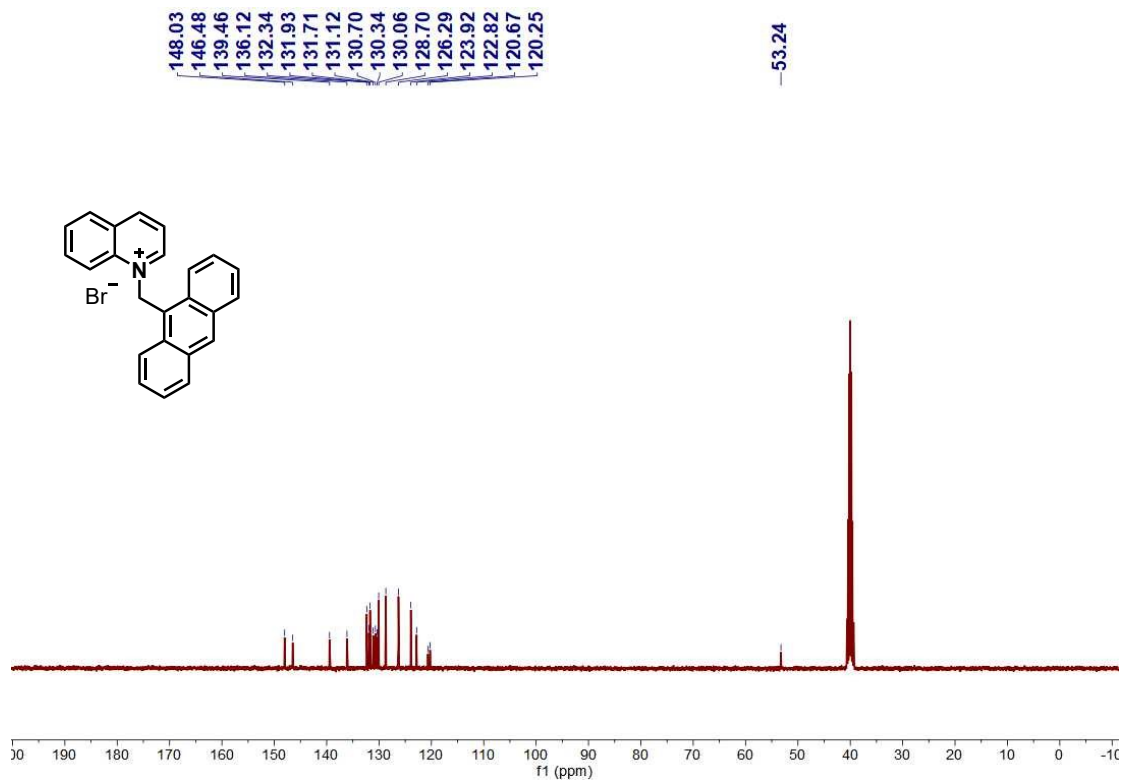

<sup>1</sup>H NMR and <sup>13</sup>C NMR of **1a**

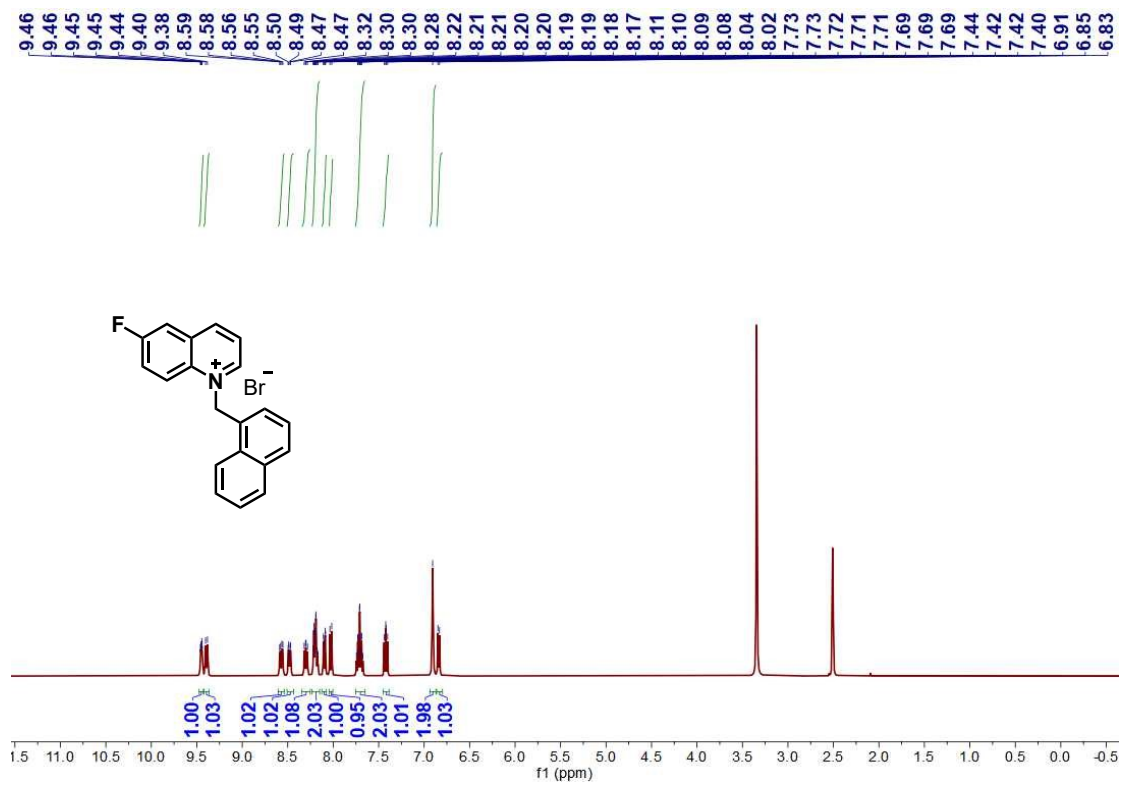

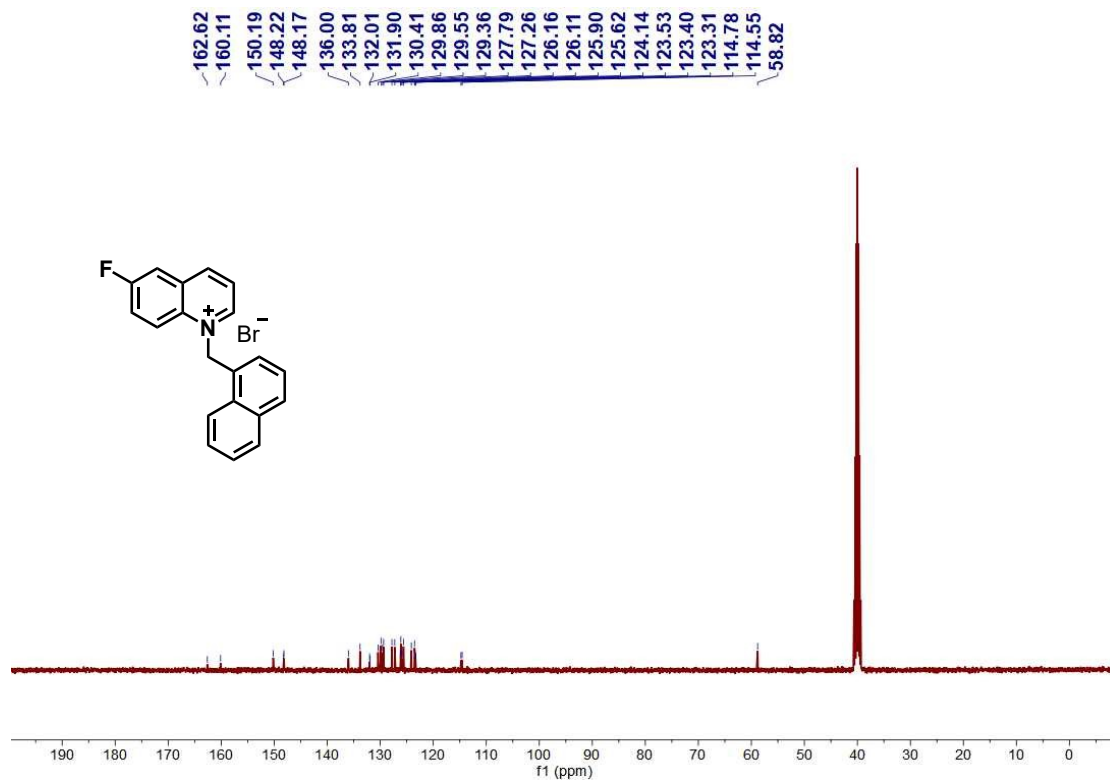

<sup>1</sup>H NMR and <sup>13</sup>C NMR of **1am**

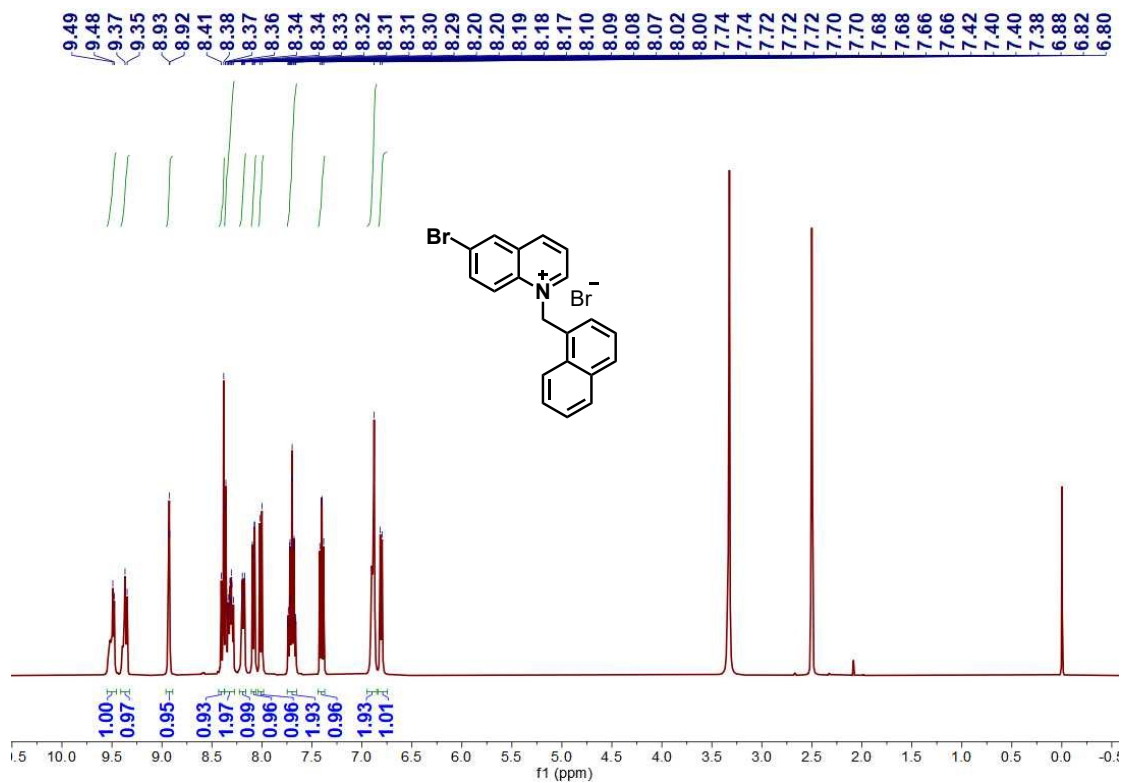

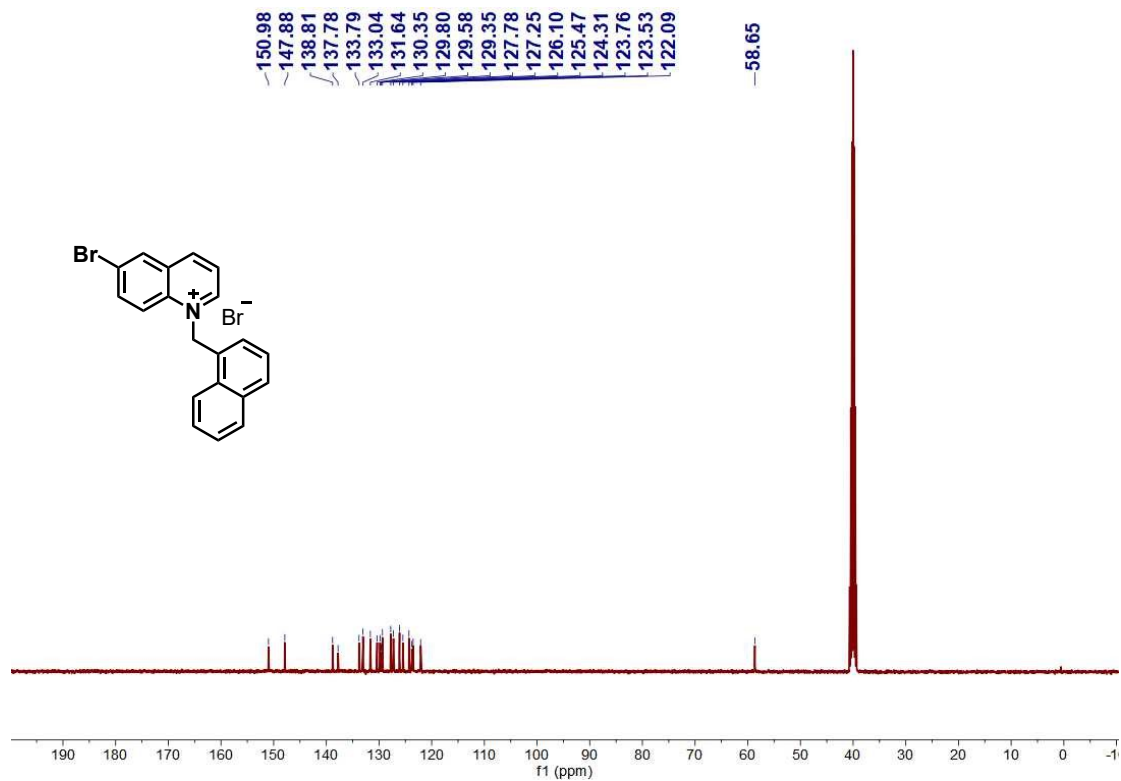

<sup>1</sup>H NMR and <sup>13</sup>C NMR of **1an**

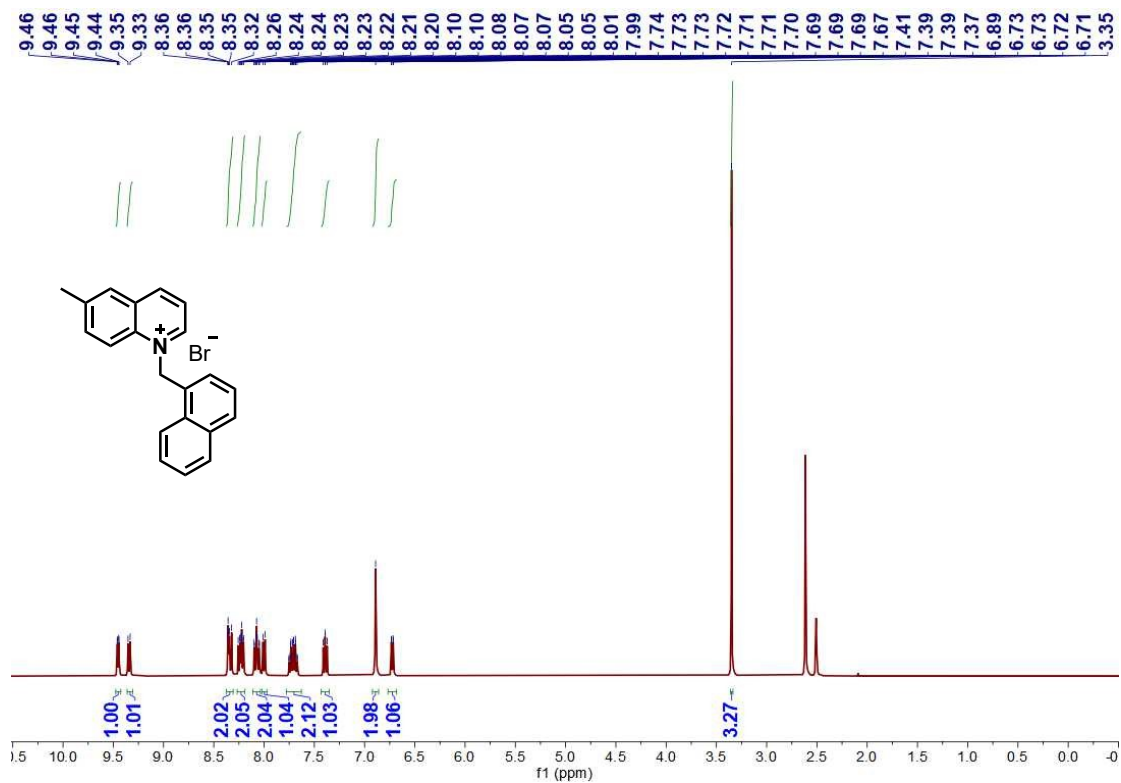

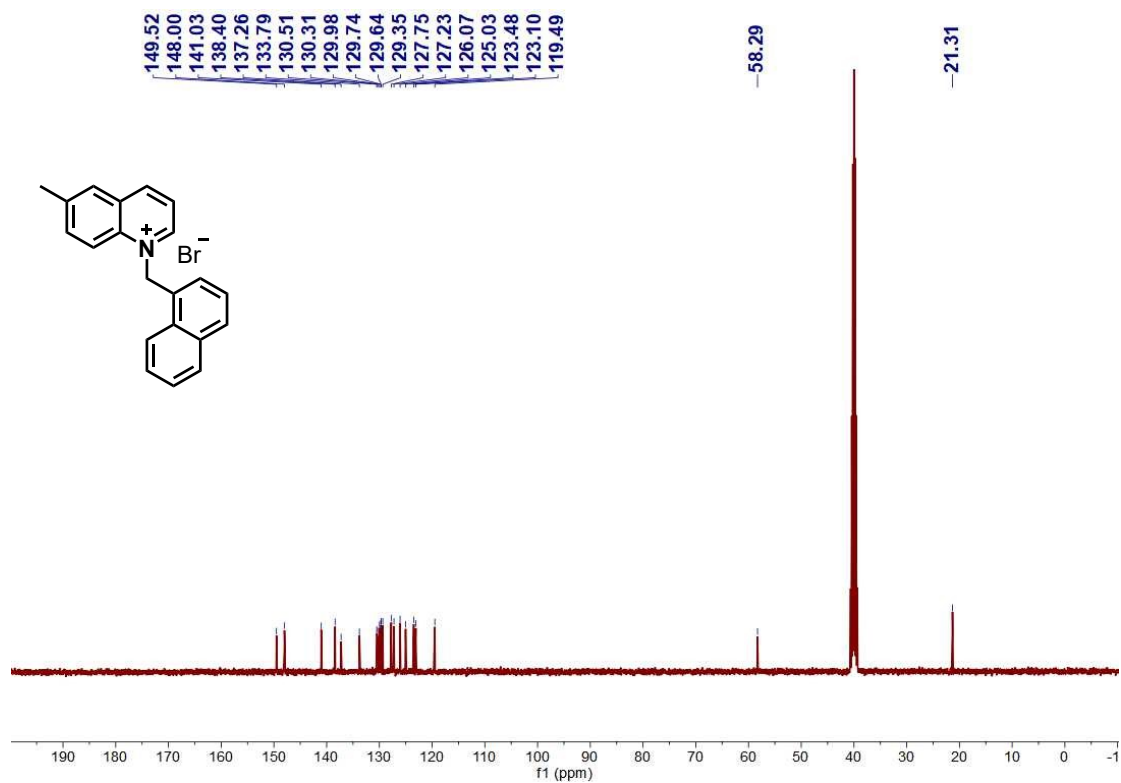

<sup>1</sup>H NMR and <sup>13</sup>C NMR of **1a**

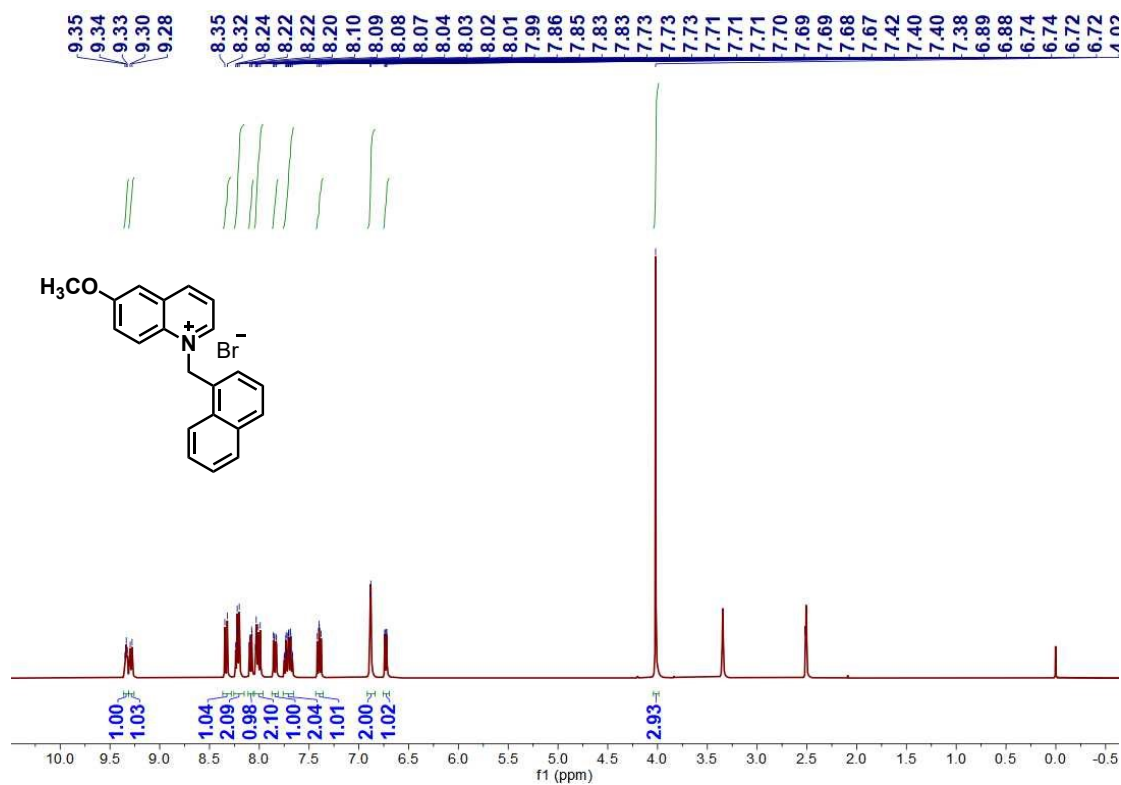

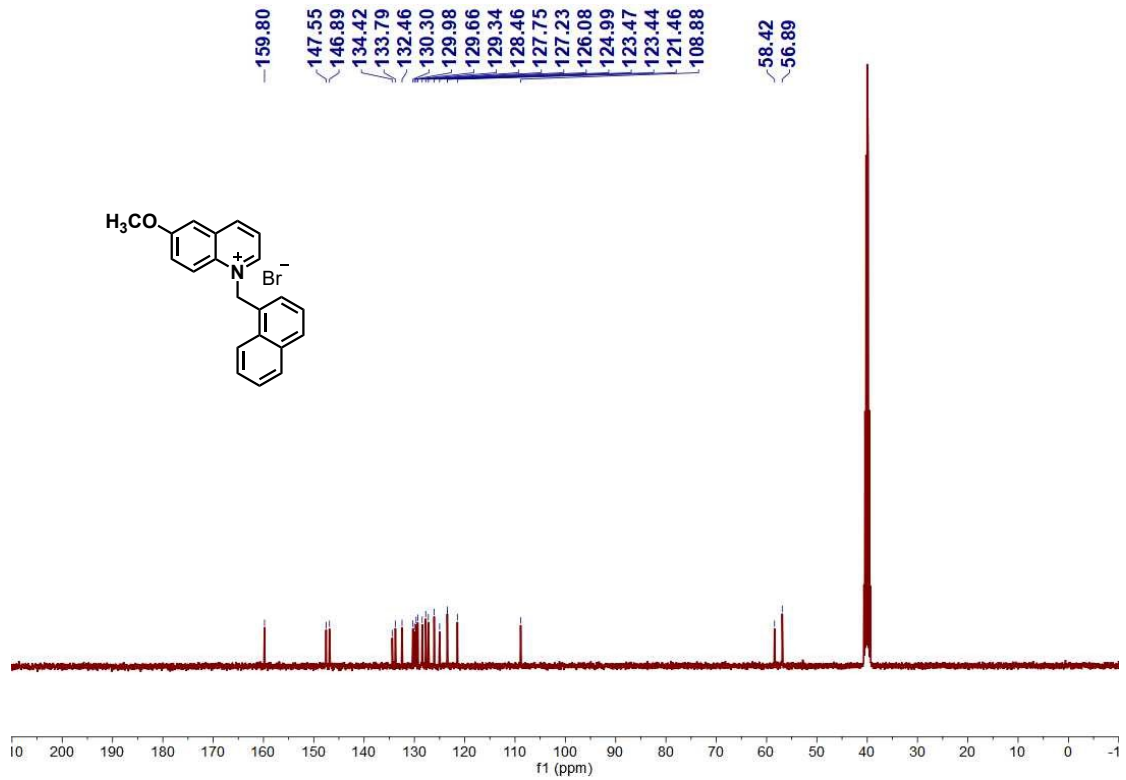

<sup>1</sup>H NMR and <sup>13</sup>C NMR of **1ap**

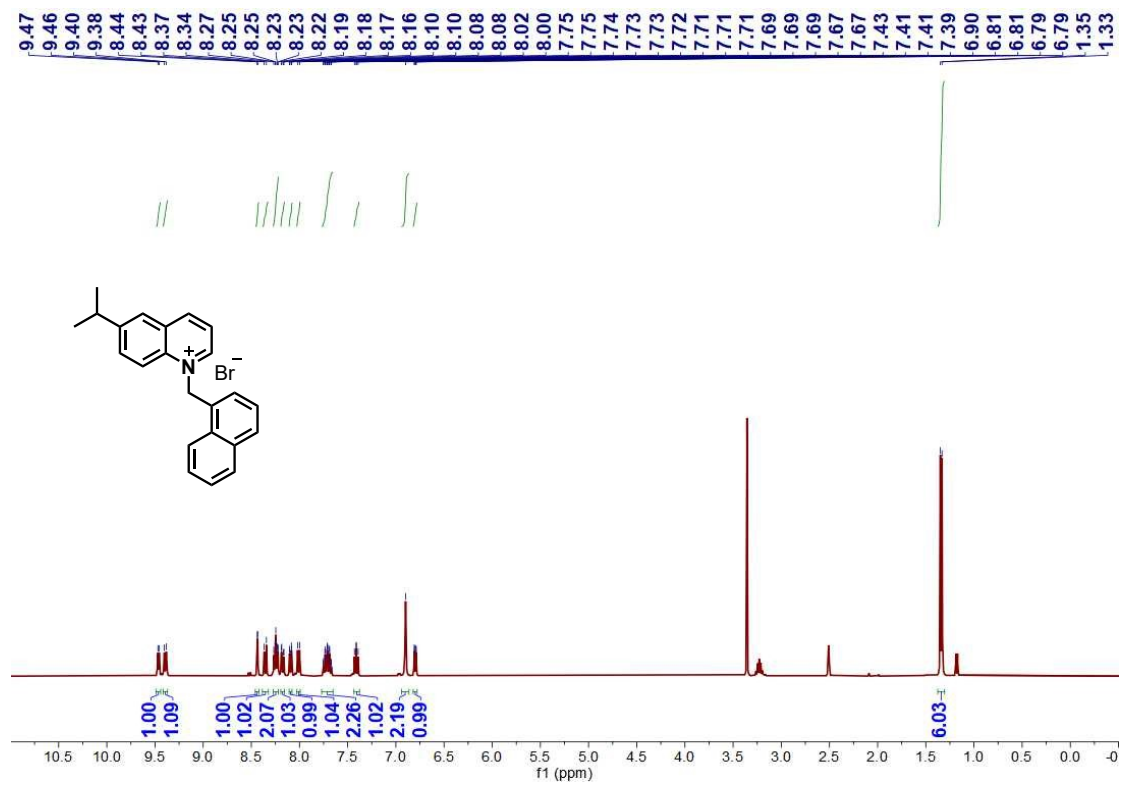

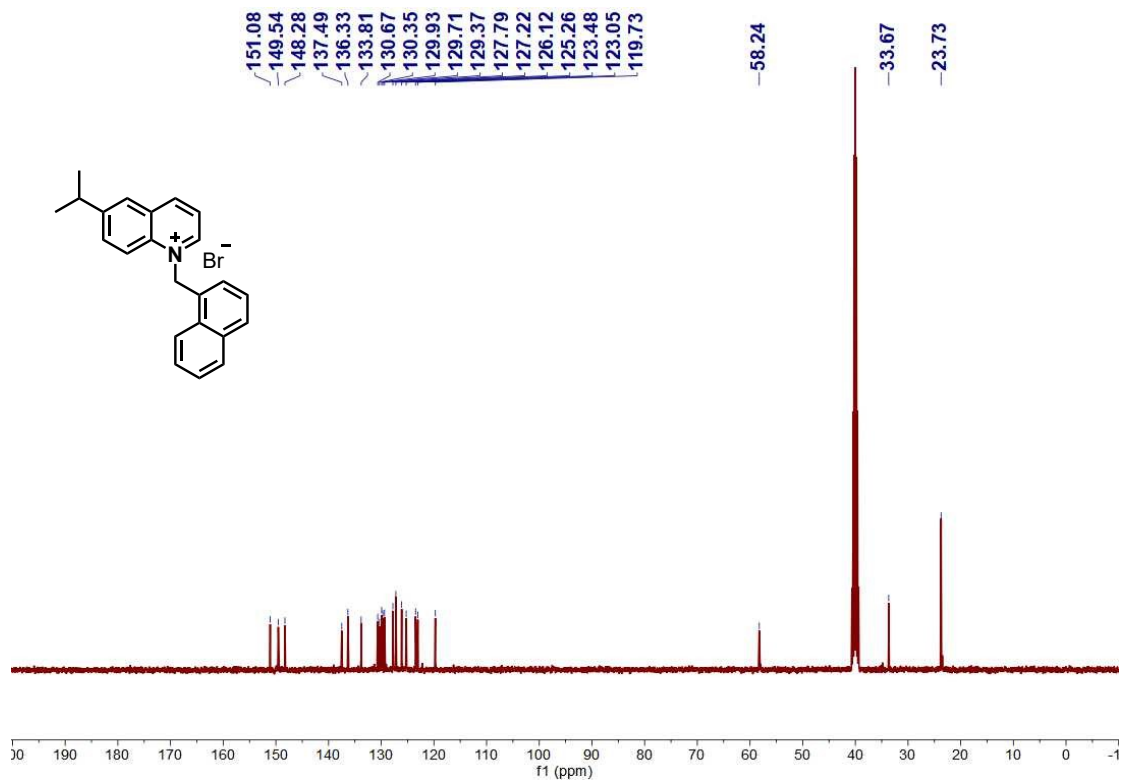

<sup>1</sup>H NMR and <sup>13</sup>C NMR of **1aq**

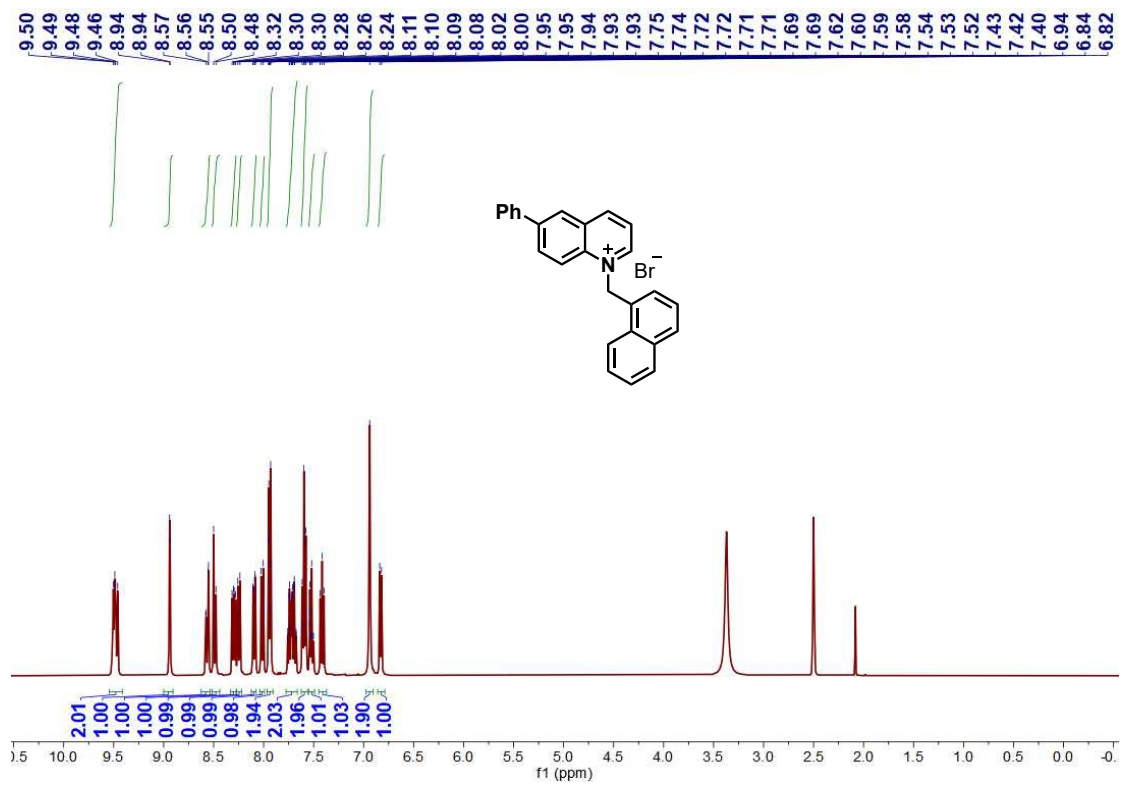

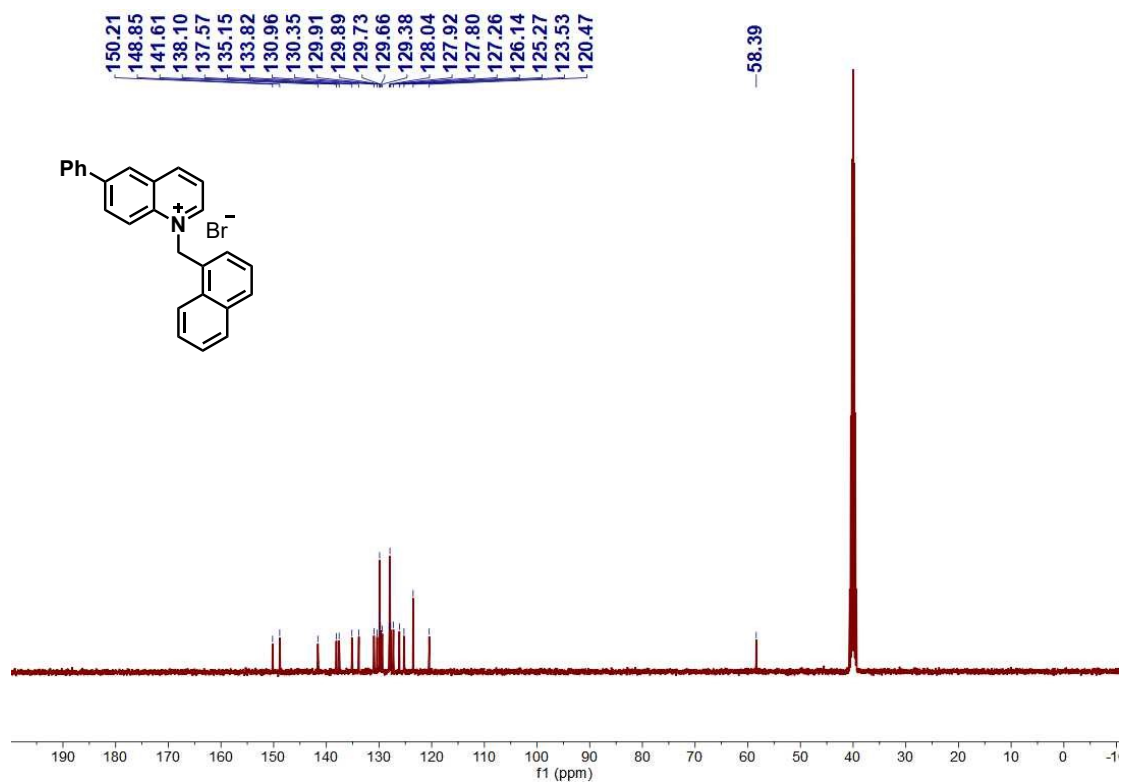

<sup>1</sup>H NMR and <sup>13</sup>C NMR of **1ar**

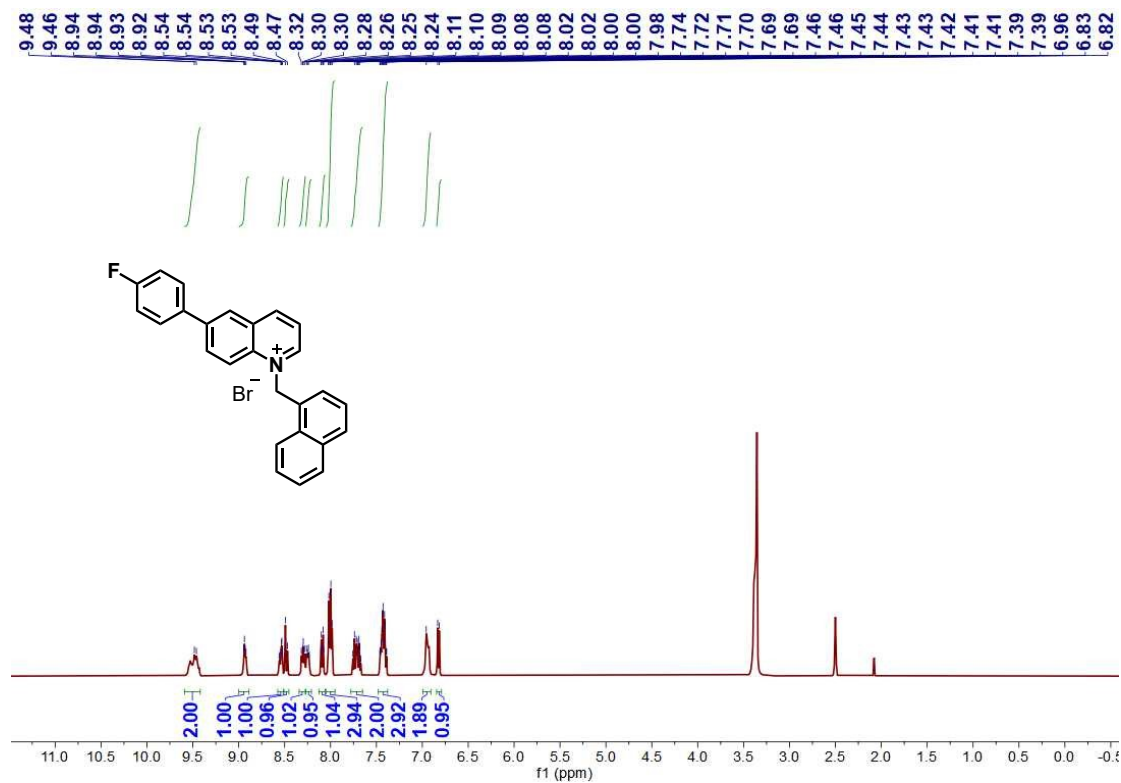



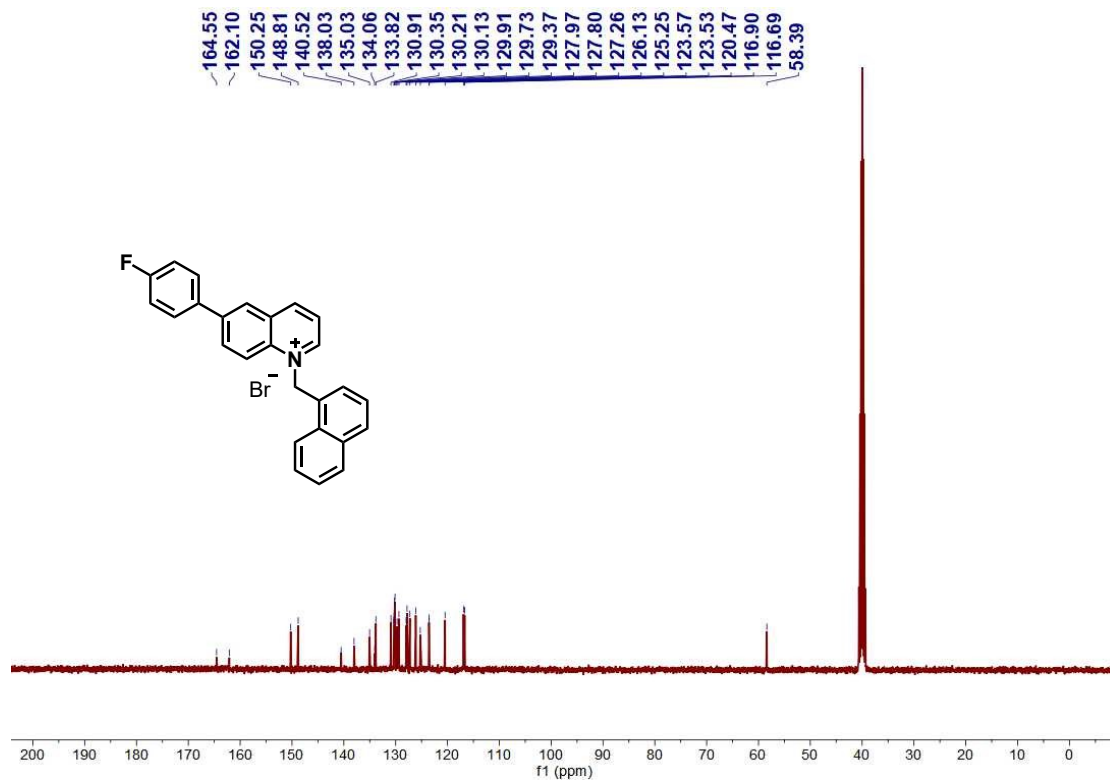

<sup>1</sup>H NMR and <sup>13</sup>C NMR of 1as

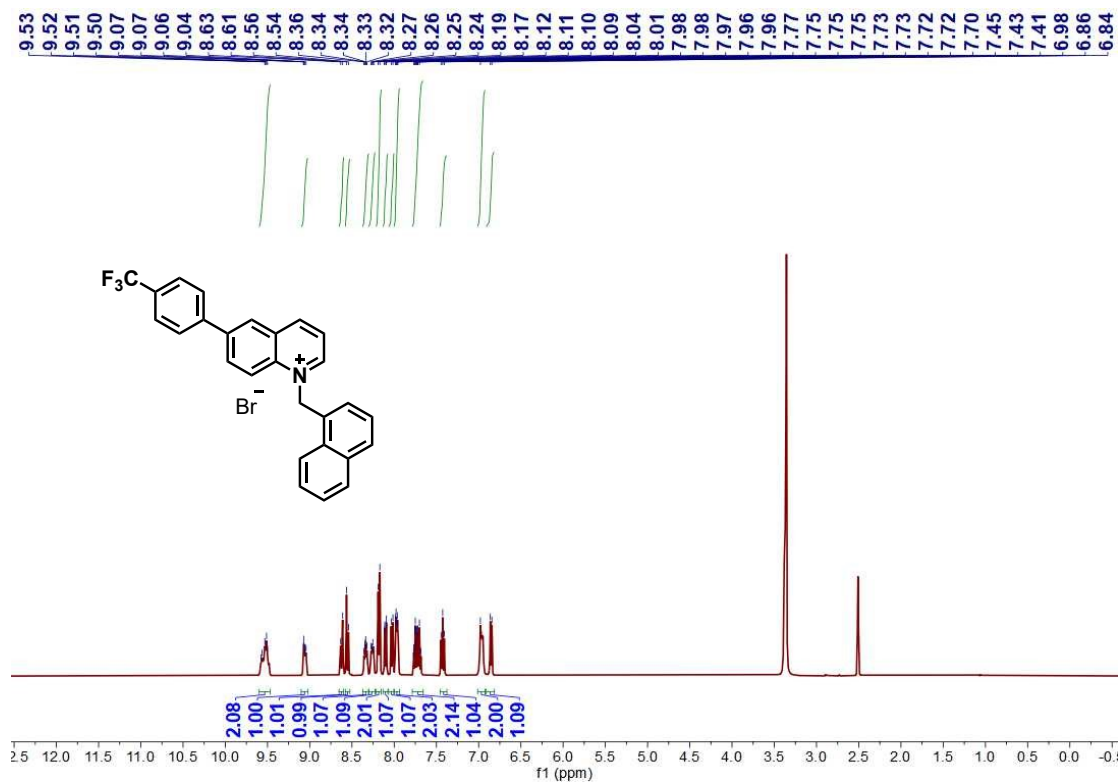

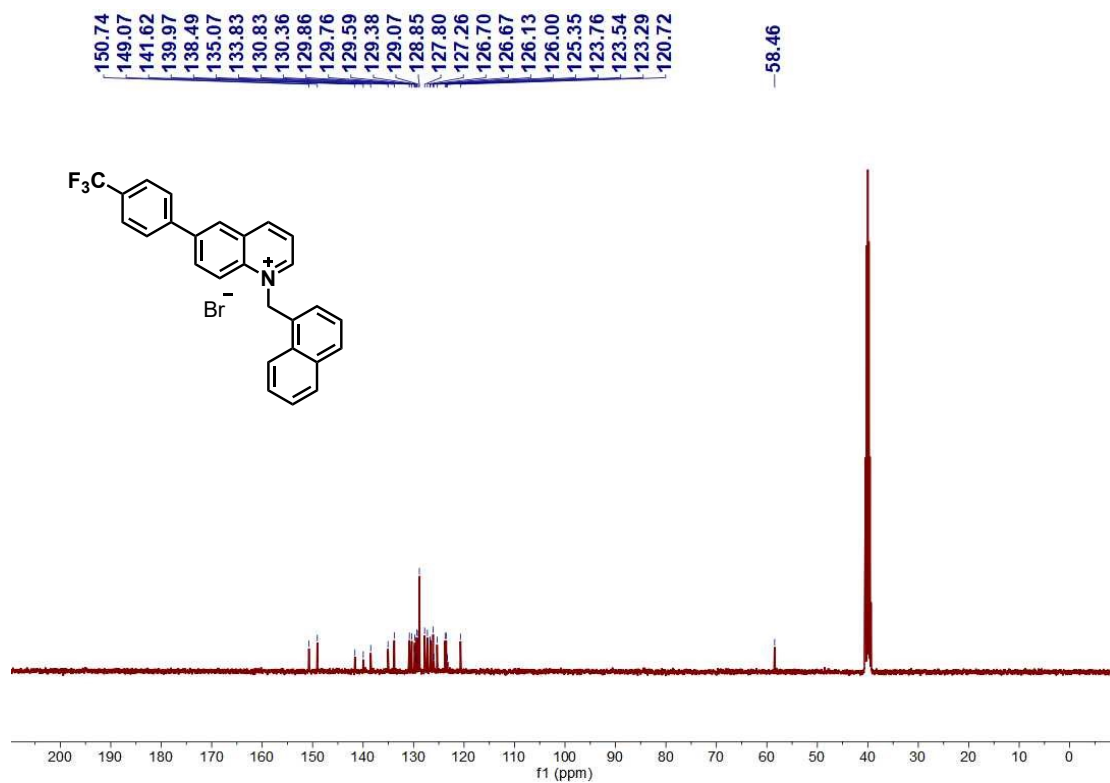

<sup>1</sup>H NMR and <sup>13</sup>C NMR of **1at**

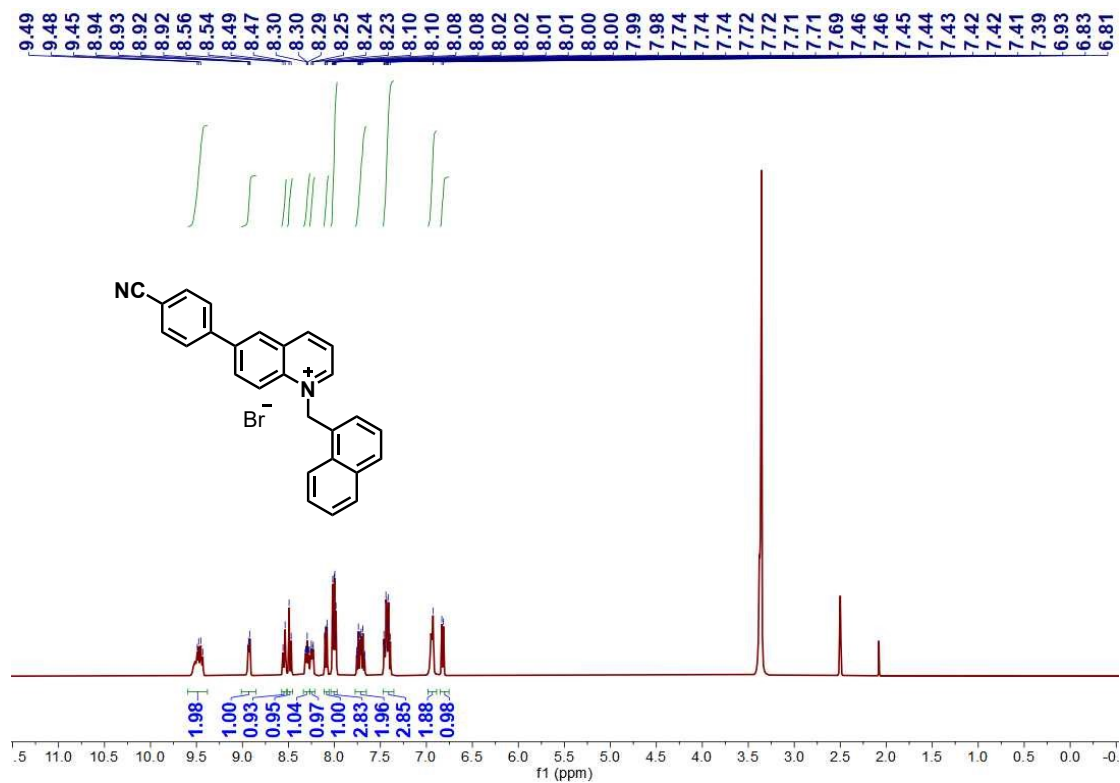

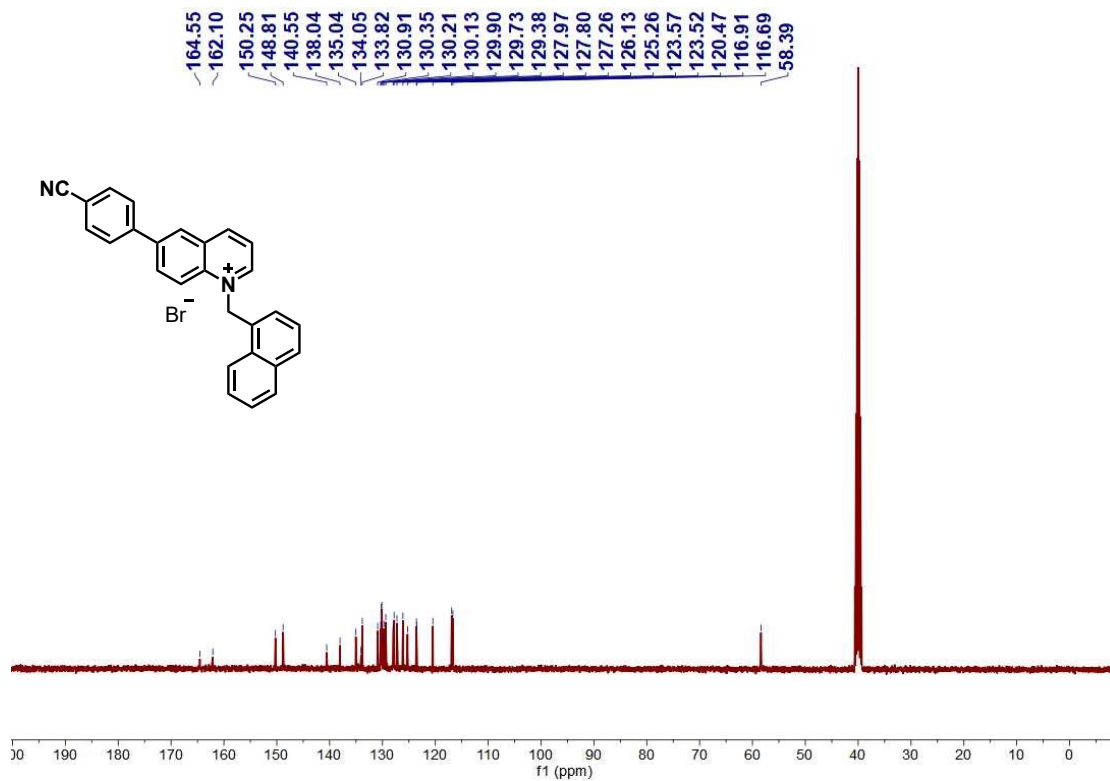

<sup>1</sup>H NMR and <sup>13</sup>C NMR of **1au**

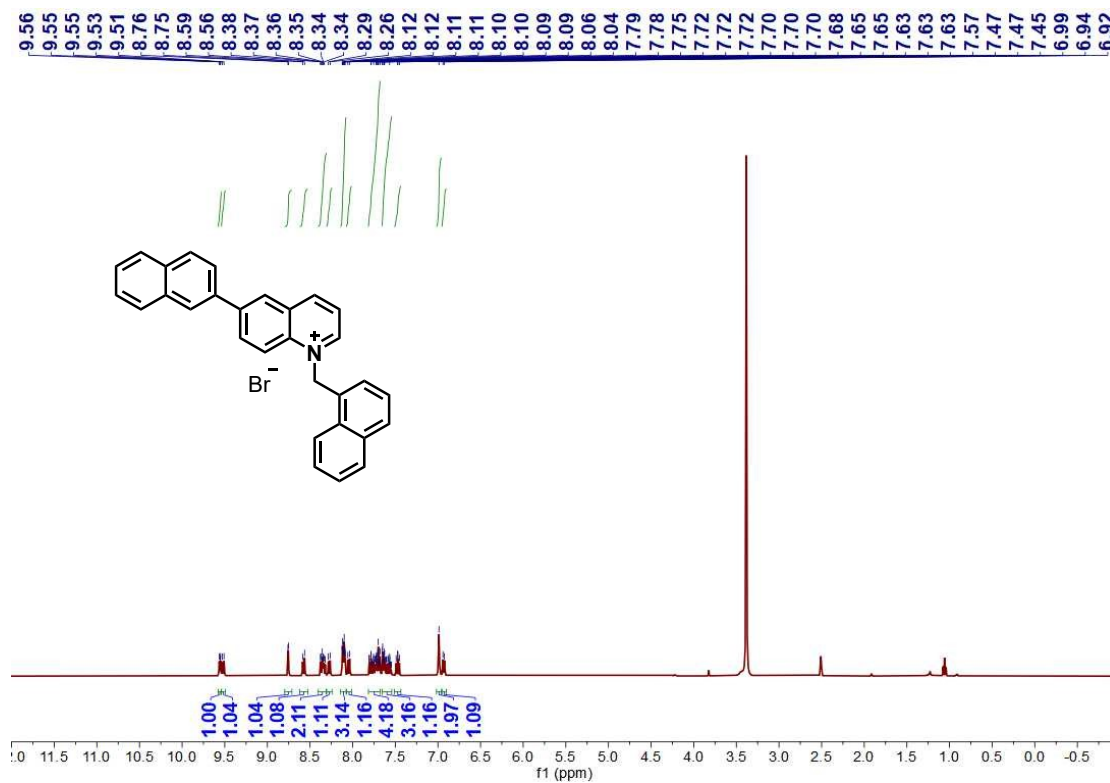

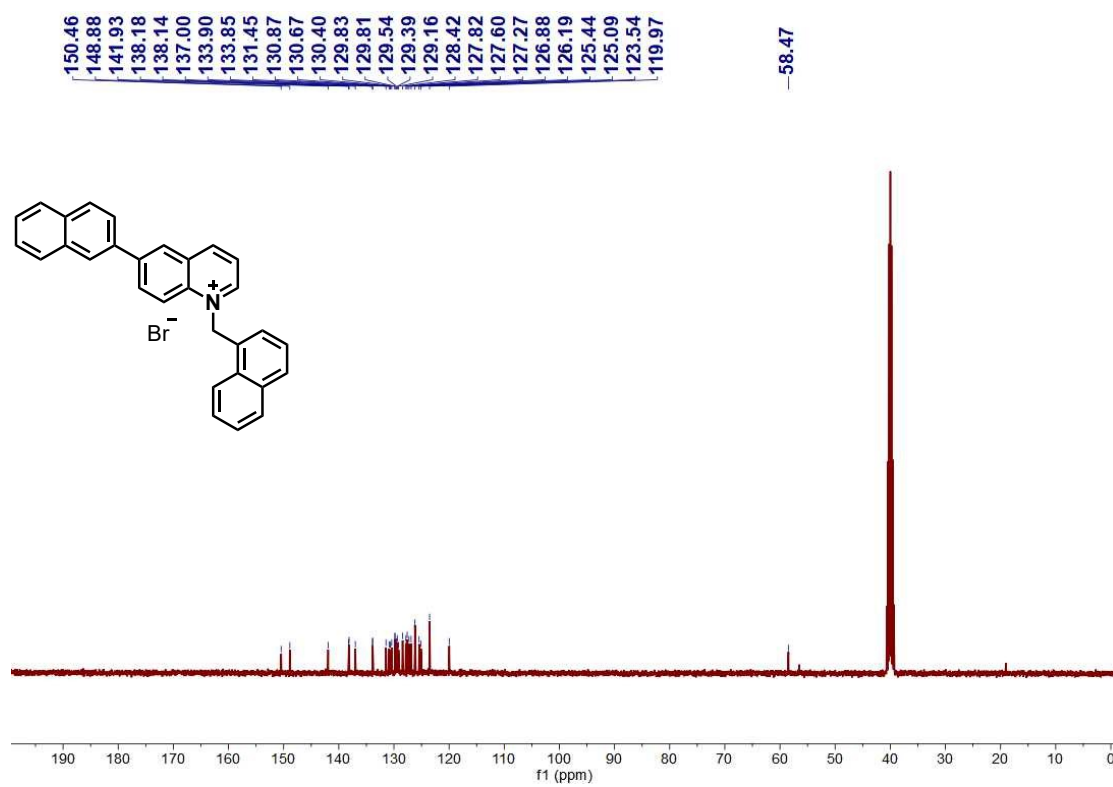

<sup>1</sup>H NMR and <sup>13</sup>C NMR of 1av

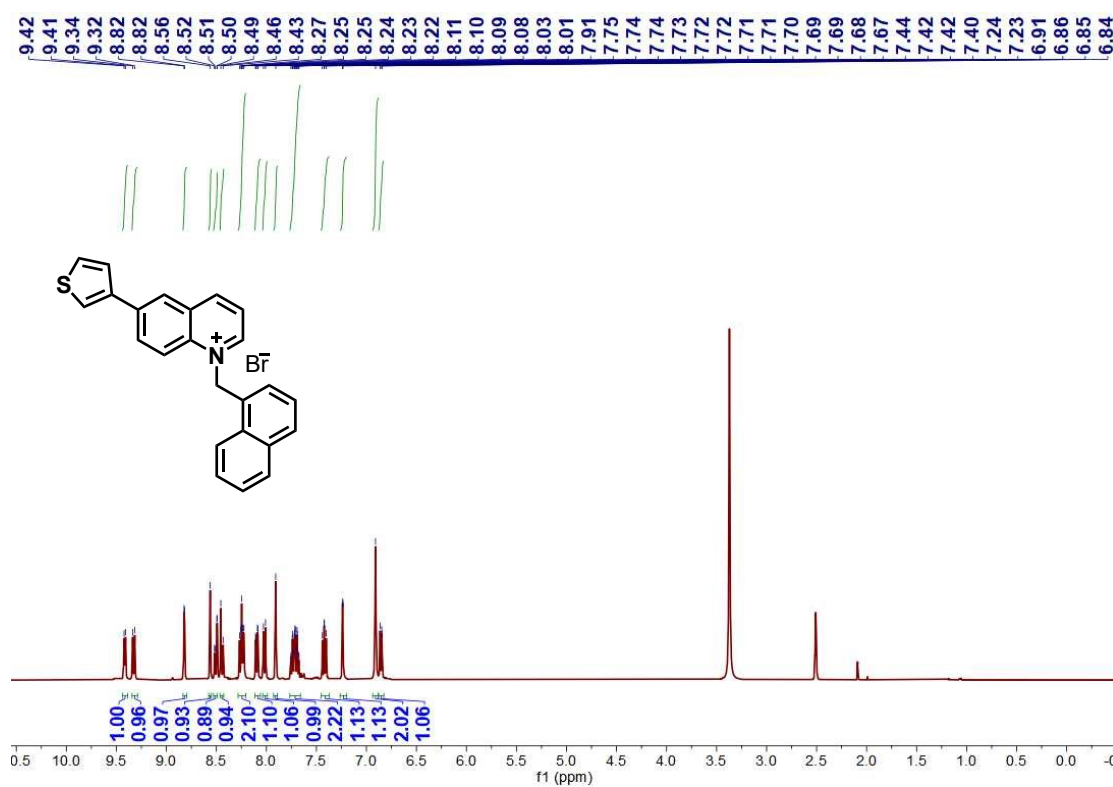

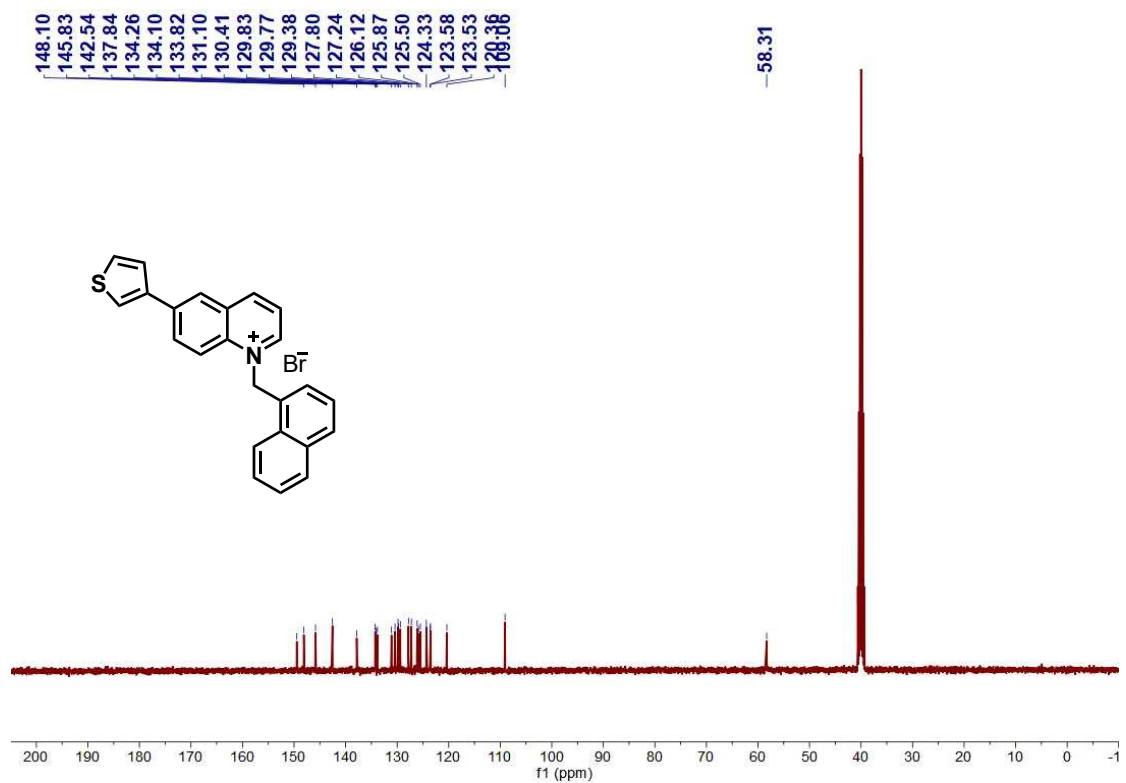

**<sup>1</sup>H NMR and <sup>13</sup>C NMR of **1aw****

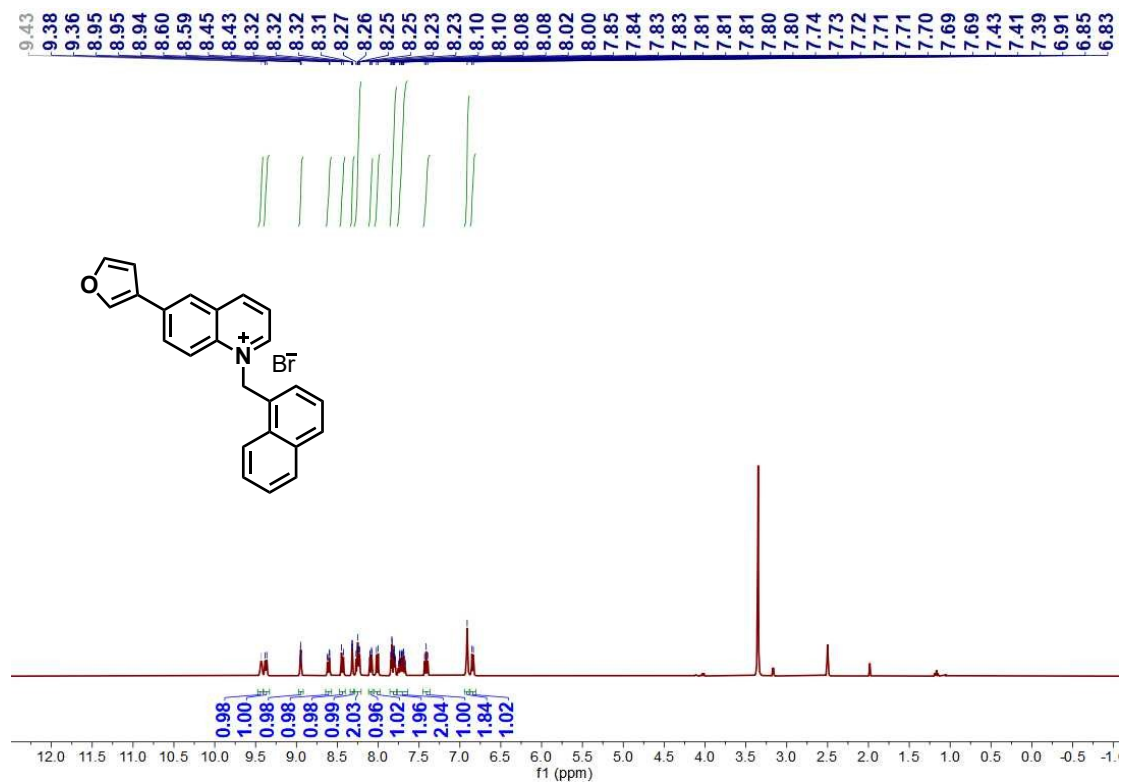

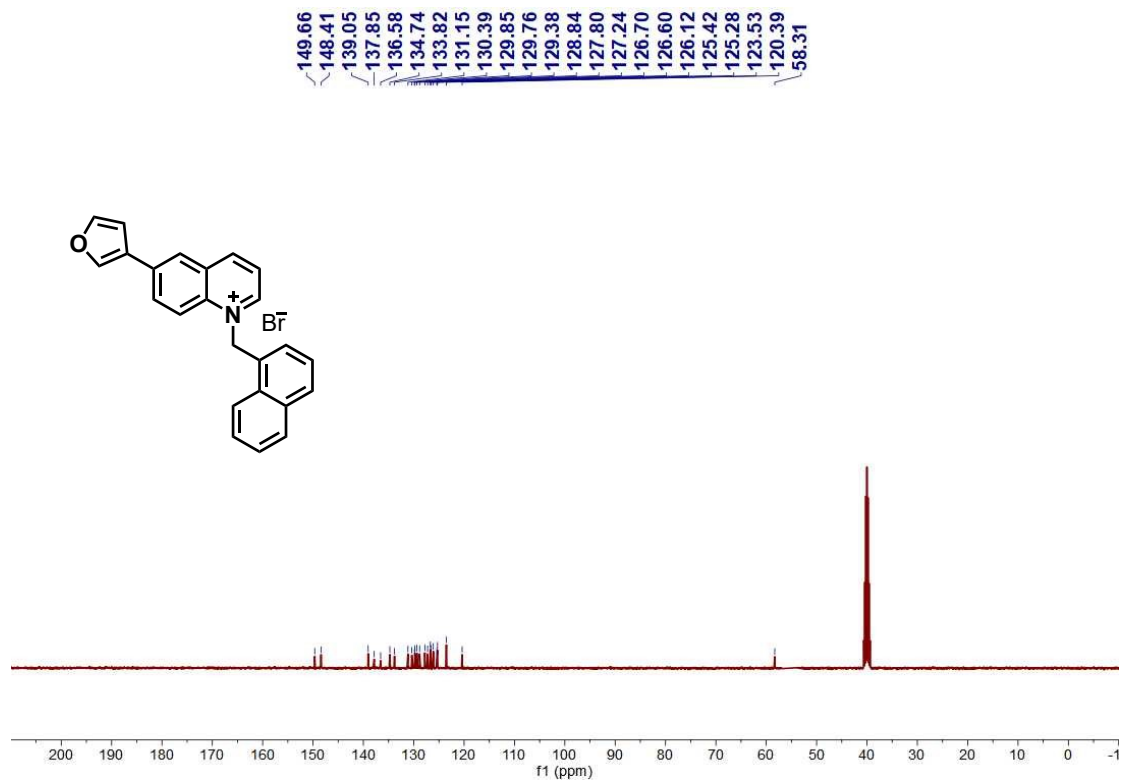

<sup>1</sup>H NMR and <sup>13</sup>C NMR of **1ax**

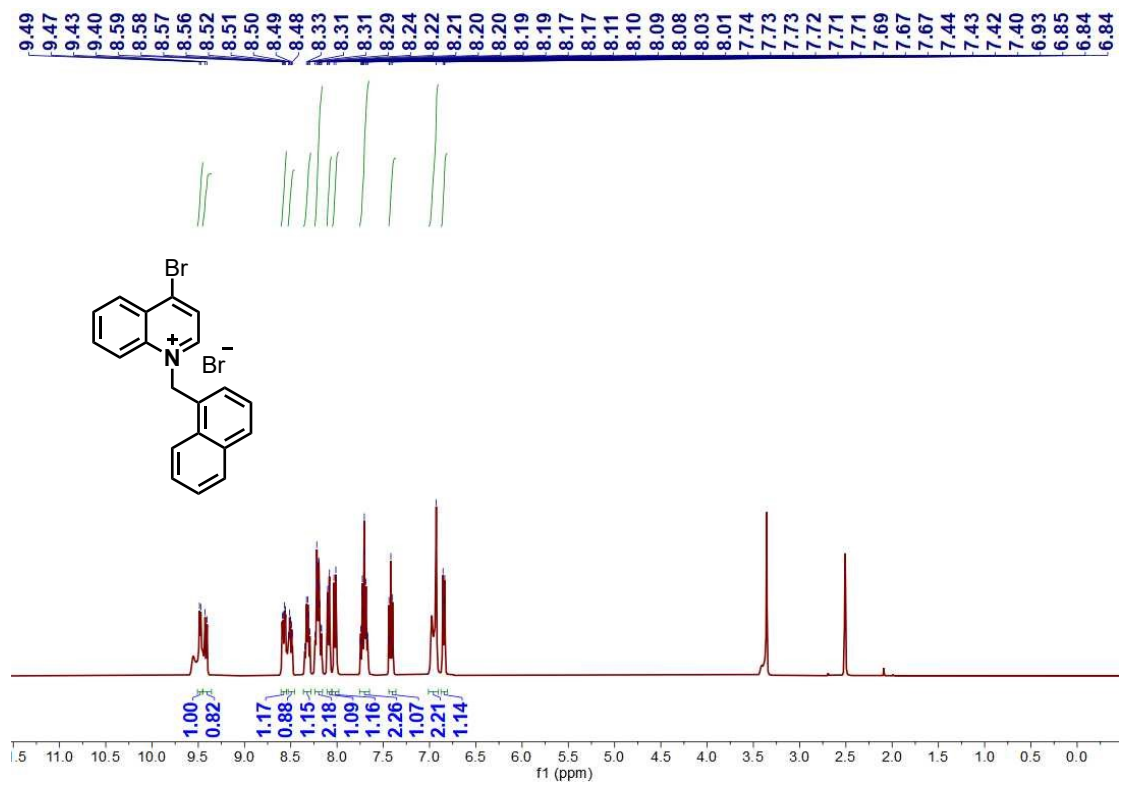

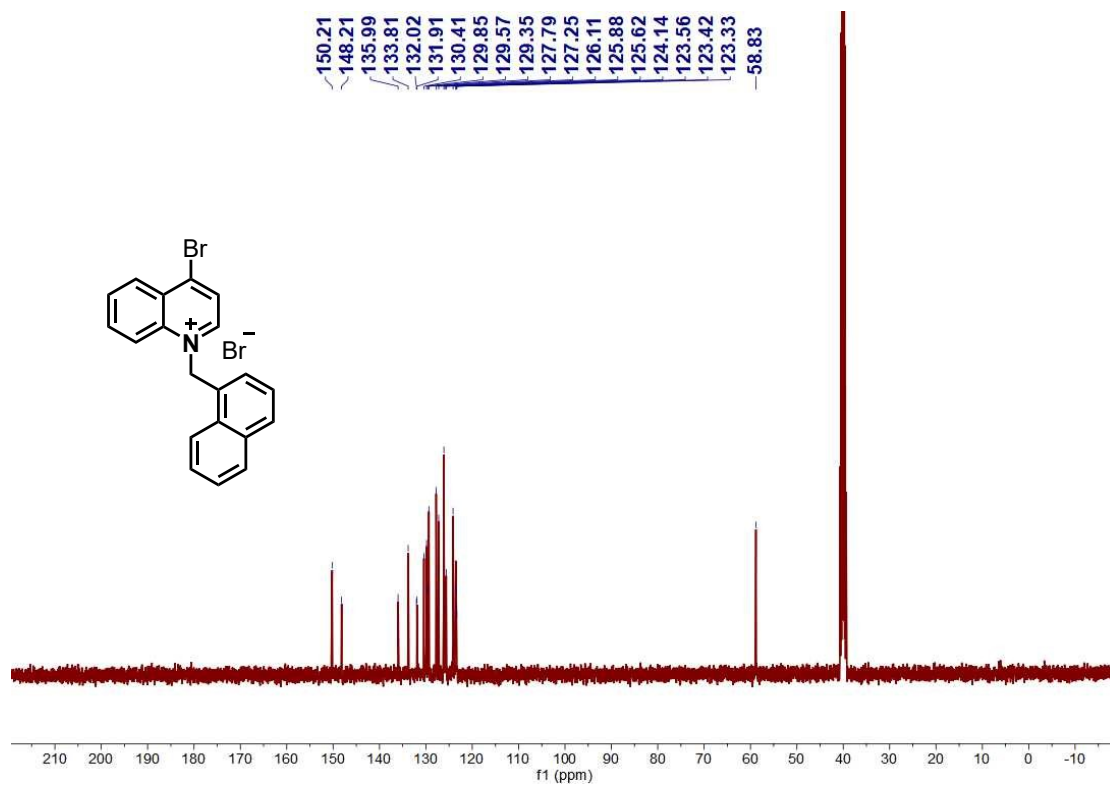

<sup>1</sup>H NMR and <sup>13</sup>C NMR of **1ay**

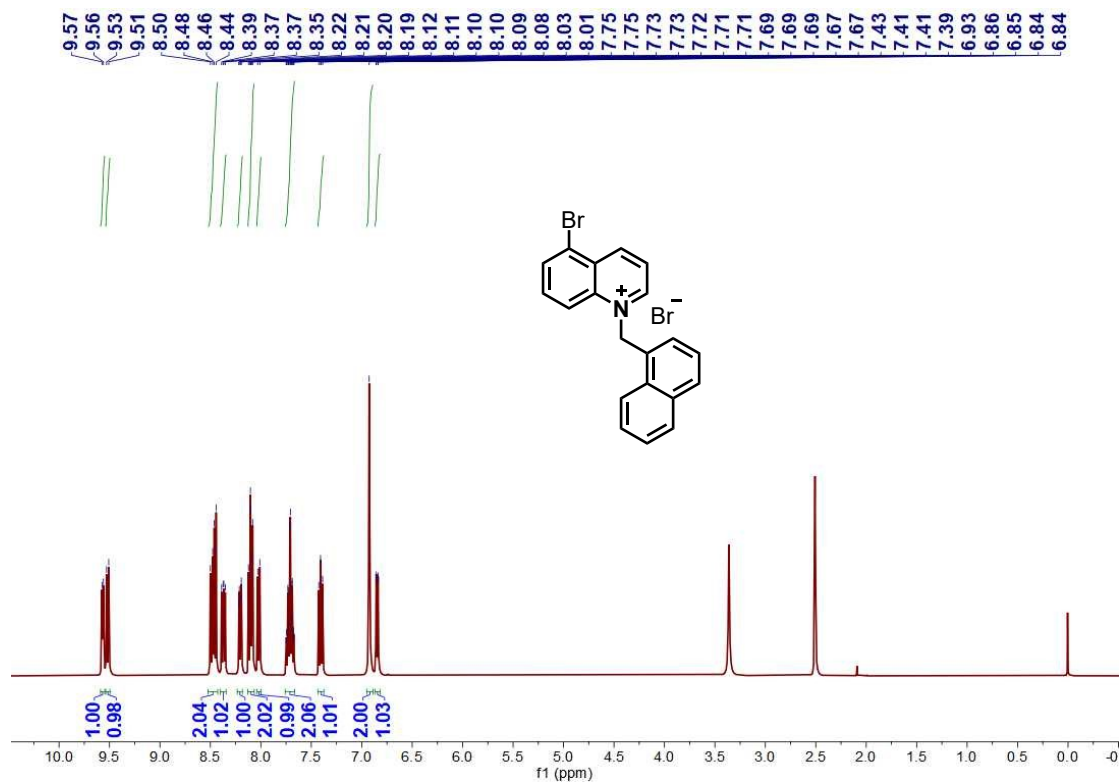

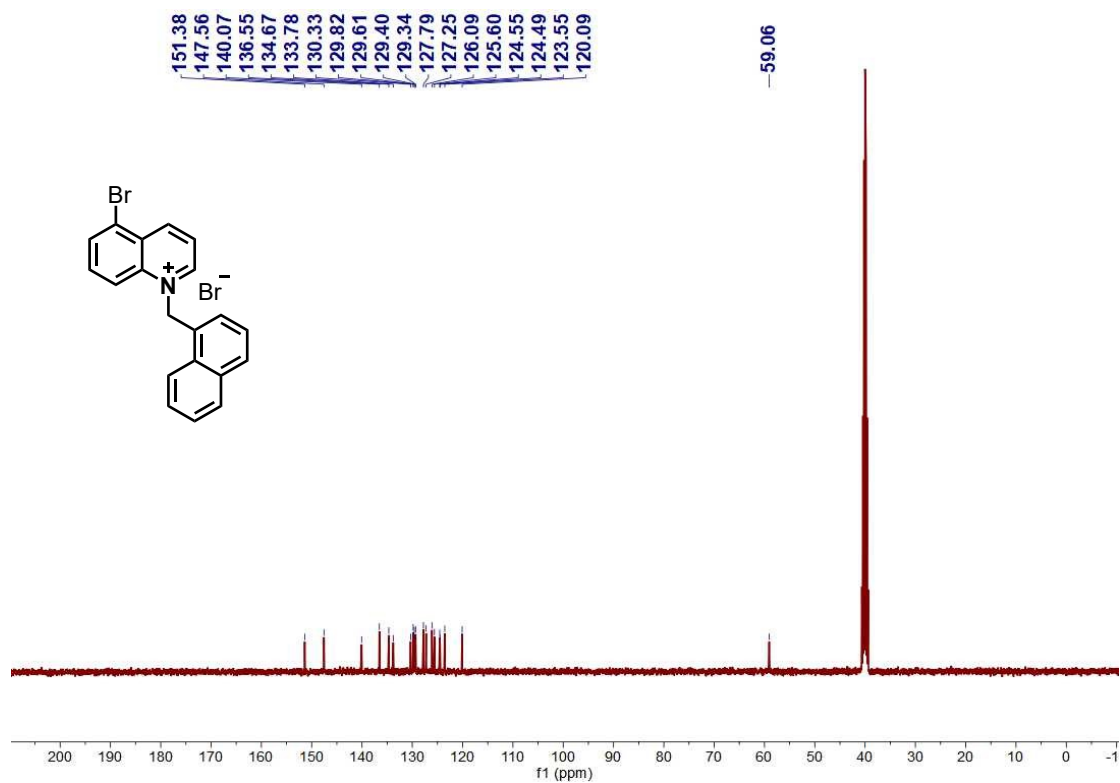

<sup>1</sup>H NMR and <sup>13</sup>C NMR of **1az**

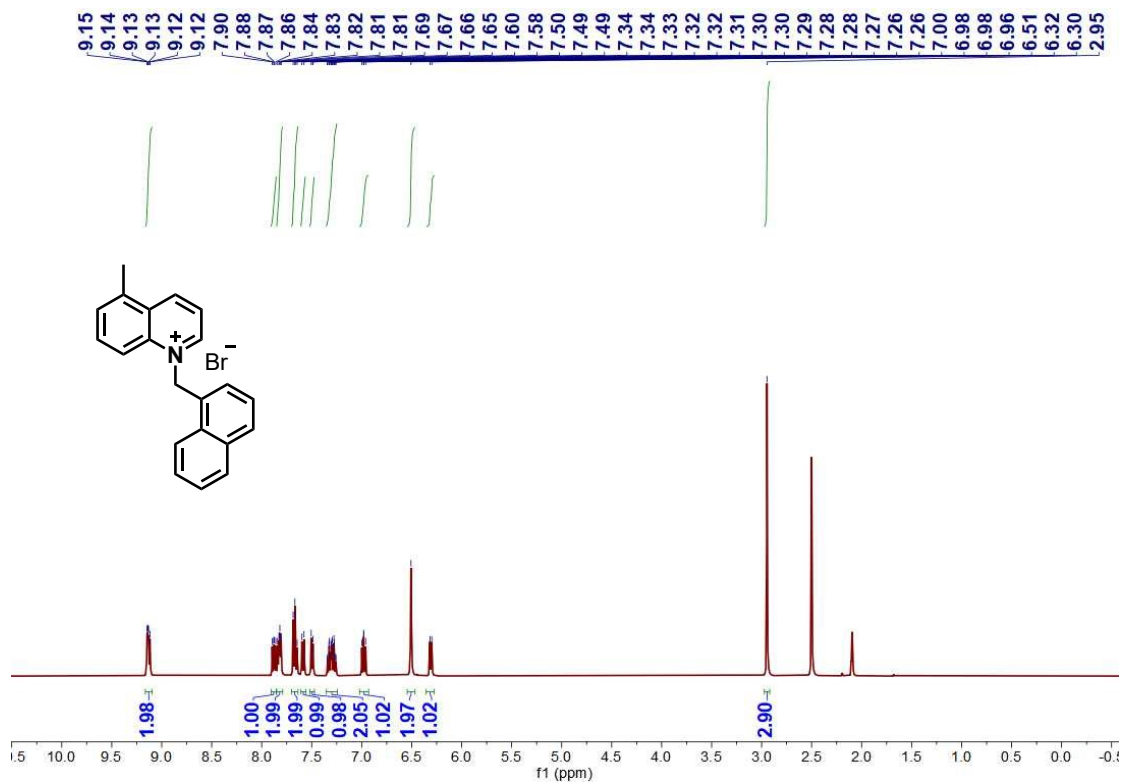



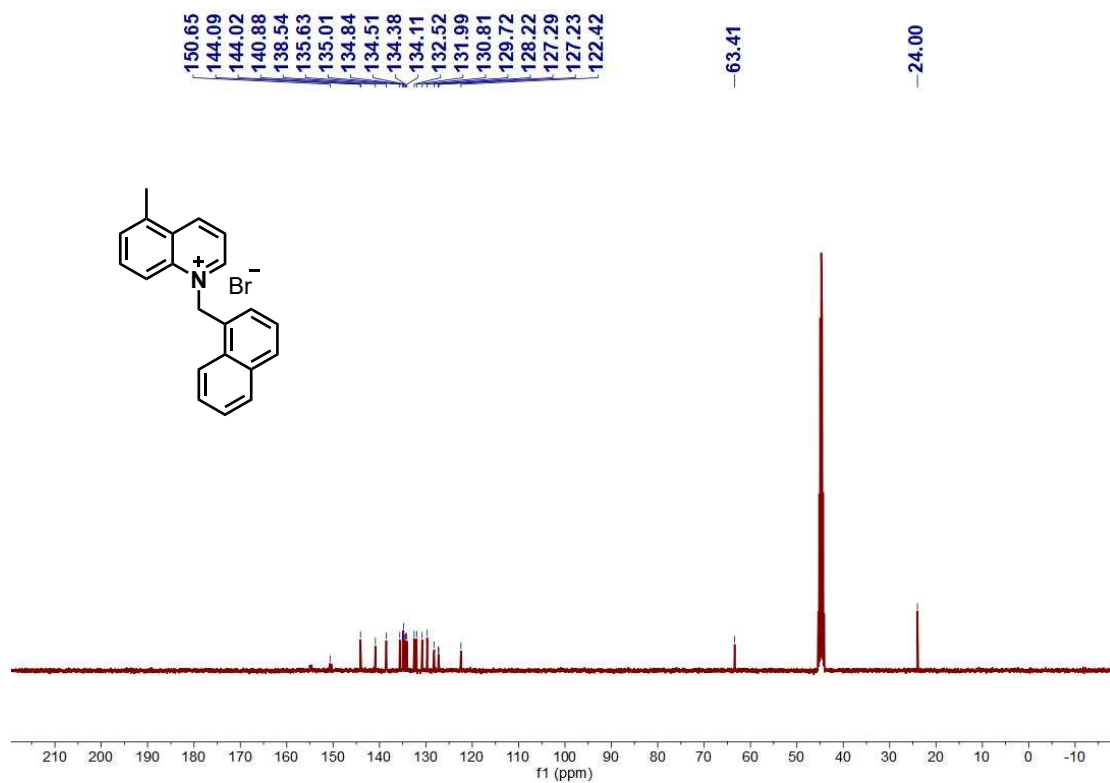

<sup>1</sup>H NMR and <sup>13</sup>C NMR of **1ba**

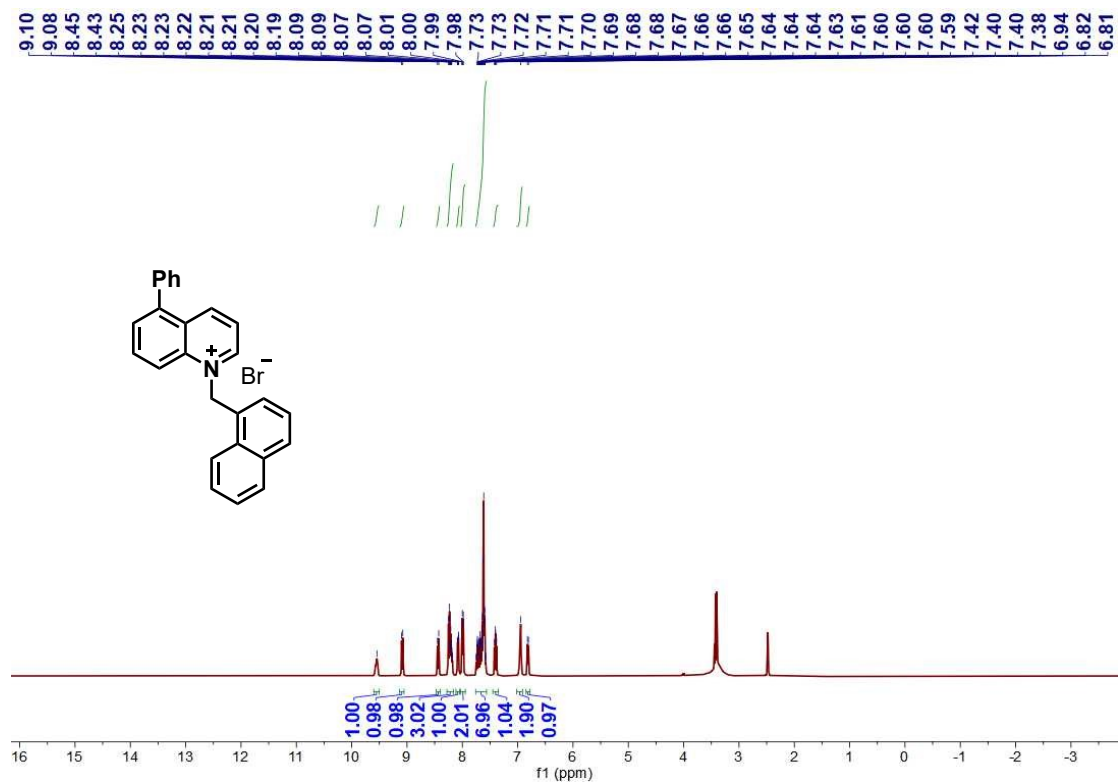

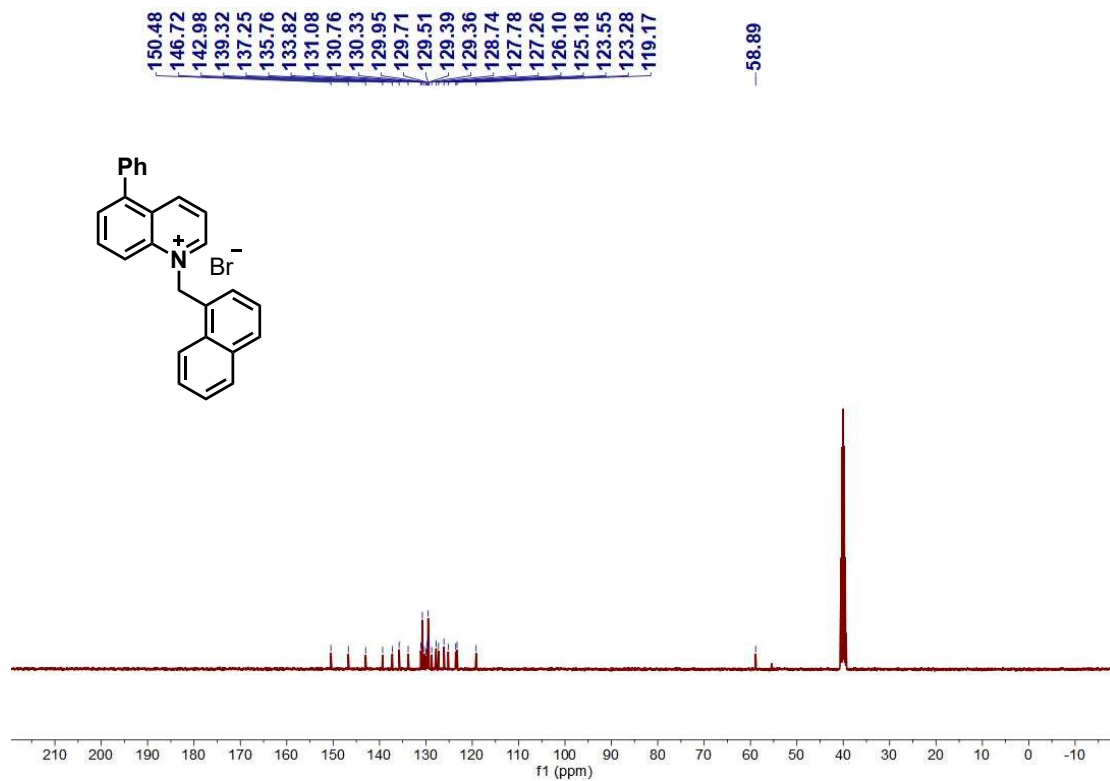

<sup>1</sup>H NMR and <sup>13</sup>C NMR of **1bb**

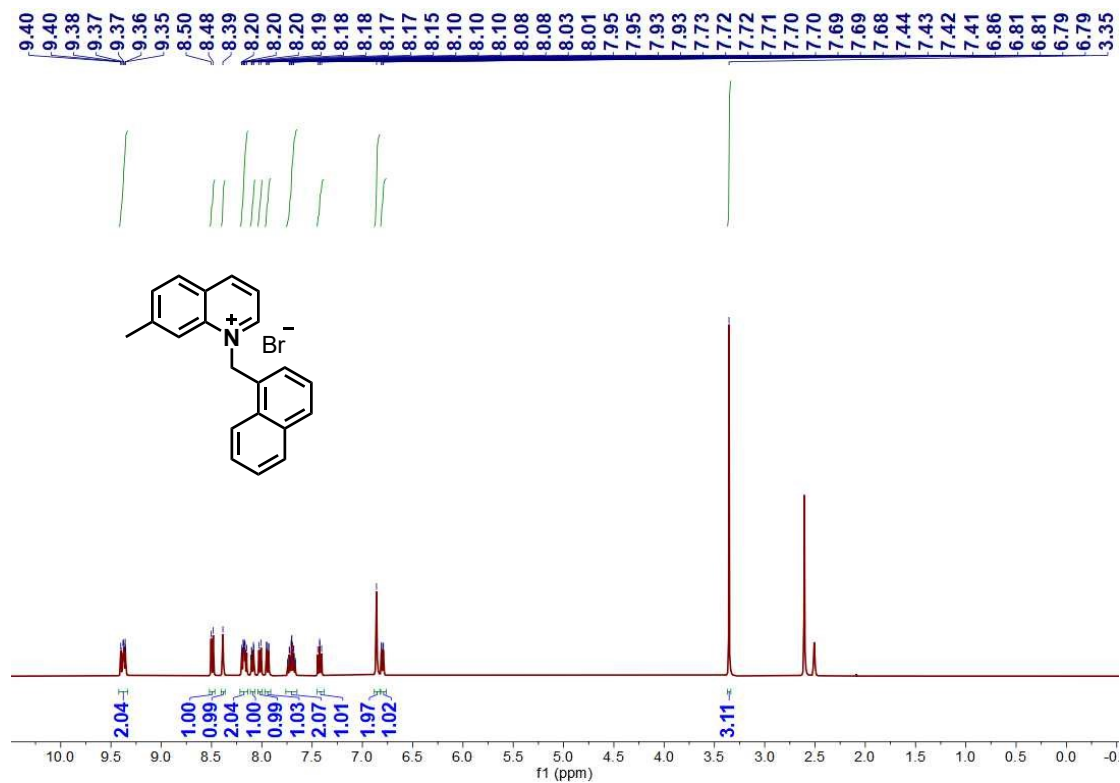

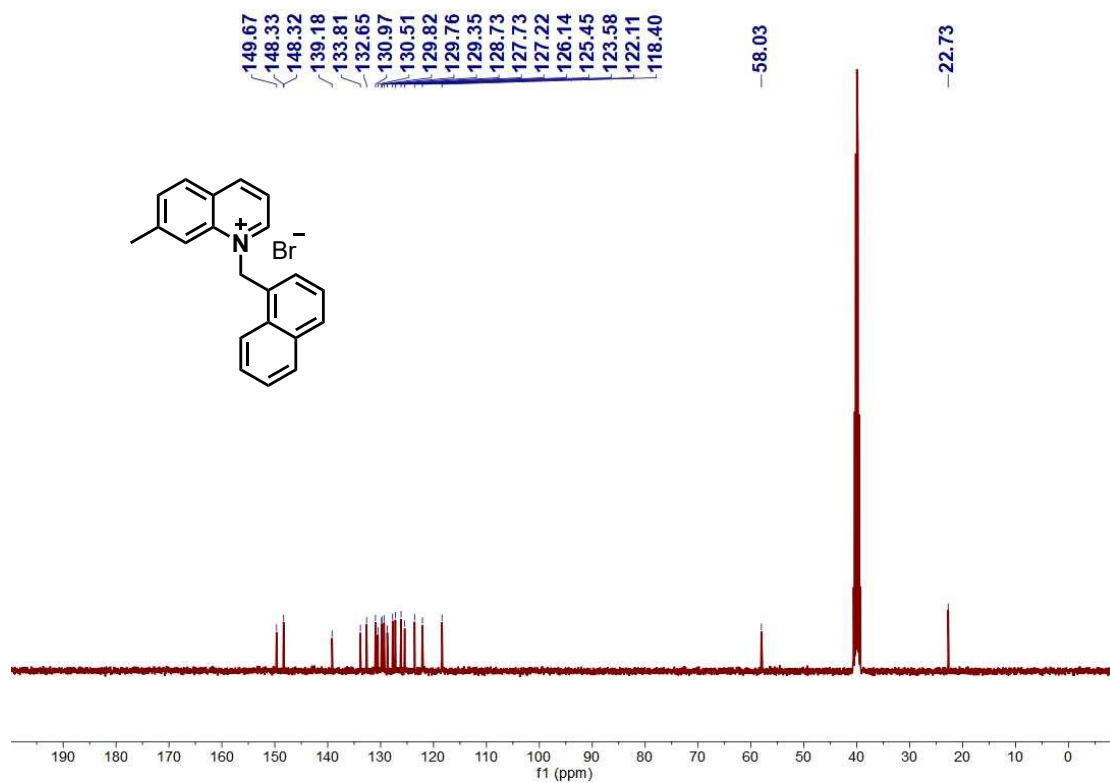

<sup>1</sup>H NMR and <sup>13</sup>C NMR of **1bc**

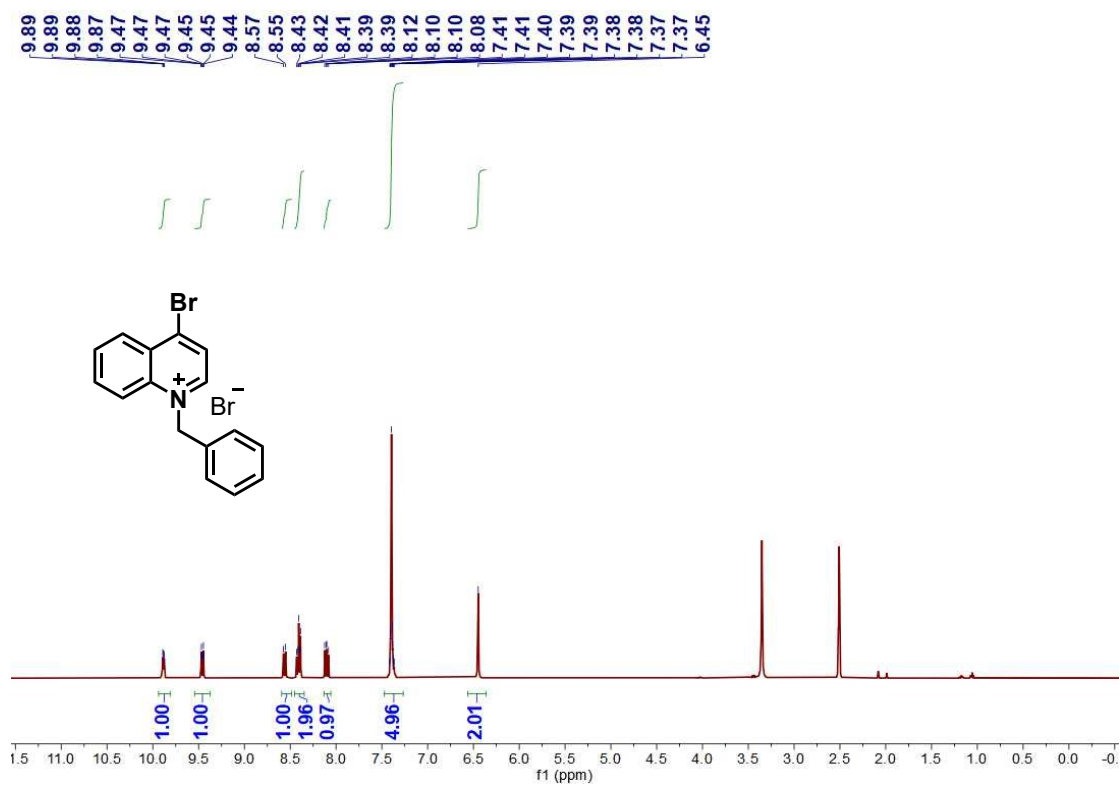

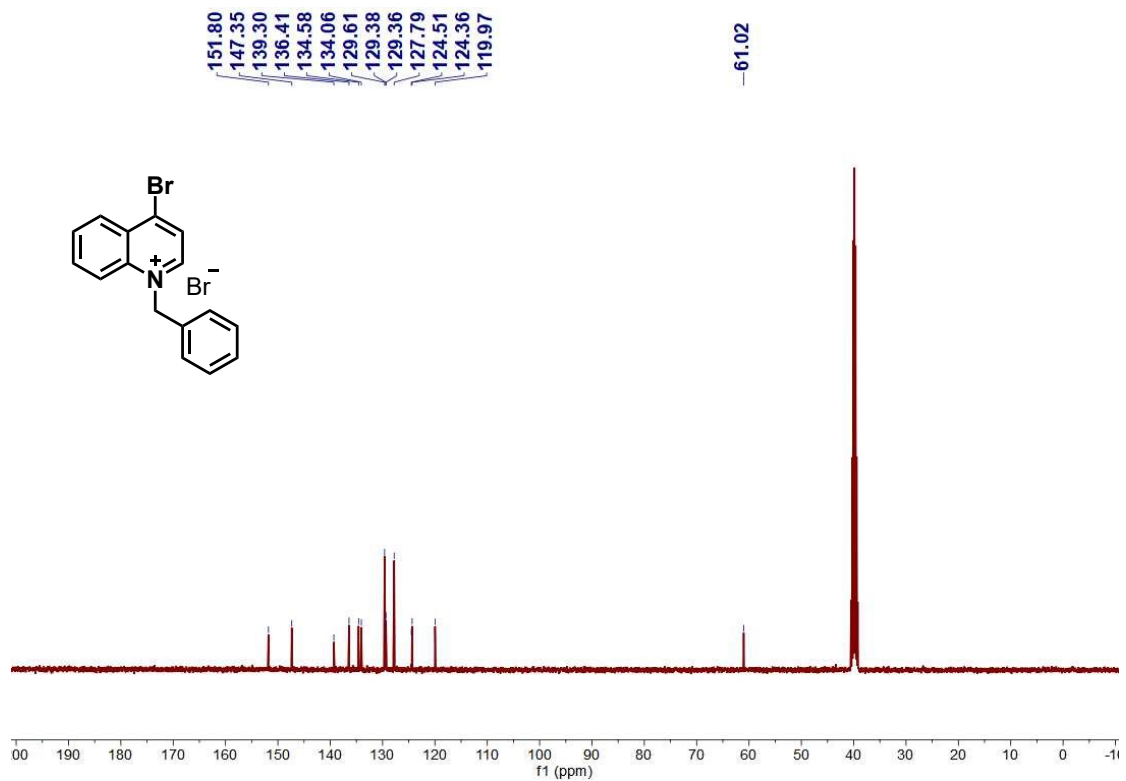

<sup>1</sup>H NMR and <sup>13</sup>C NMR of **1bd**

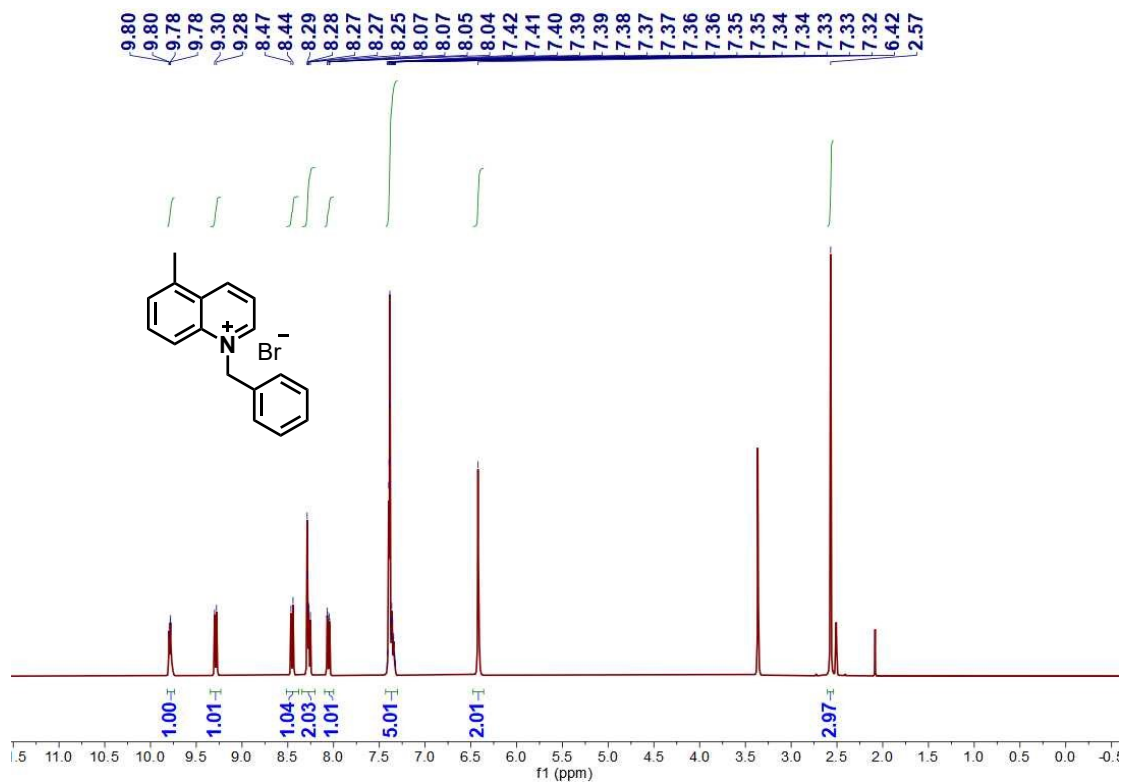

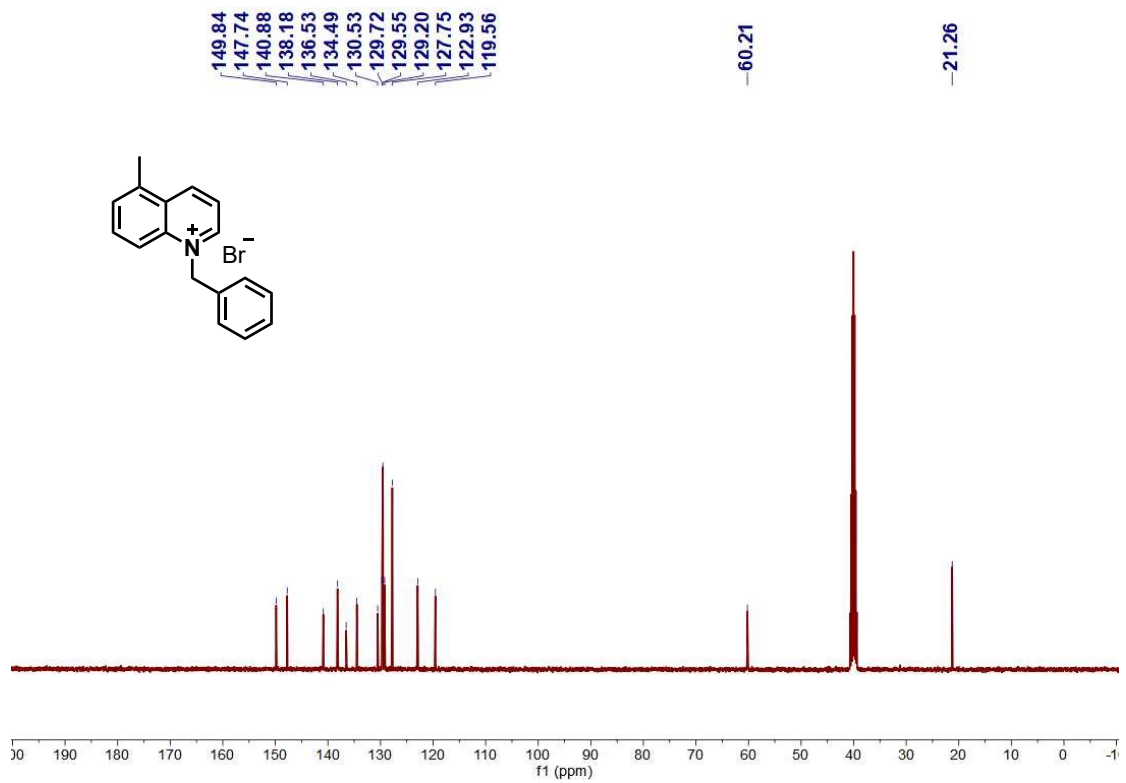

$^1\text{H}$  NMR of **1be**

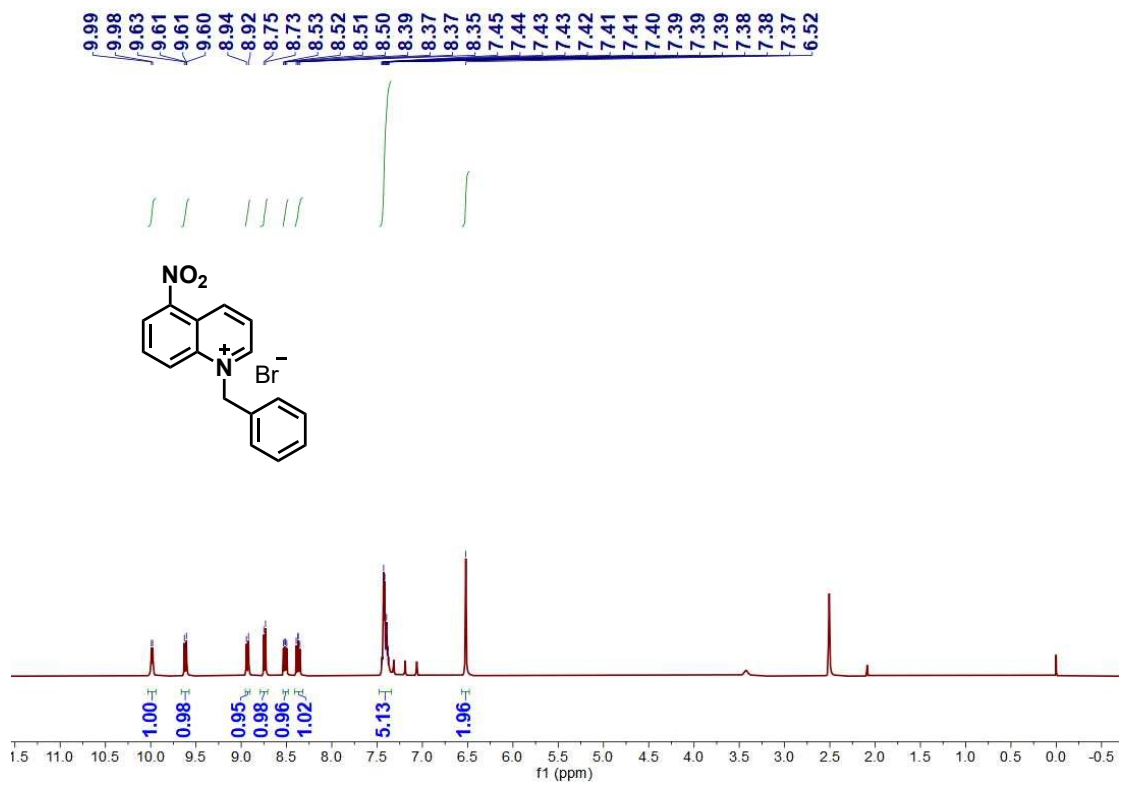

<sup>1</sup>H NMR and <sup>13</sup>C NMR of **1bf**

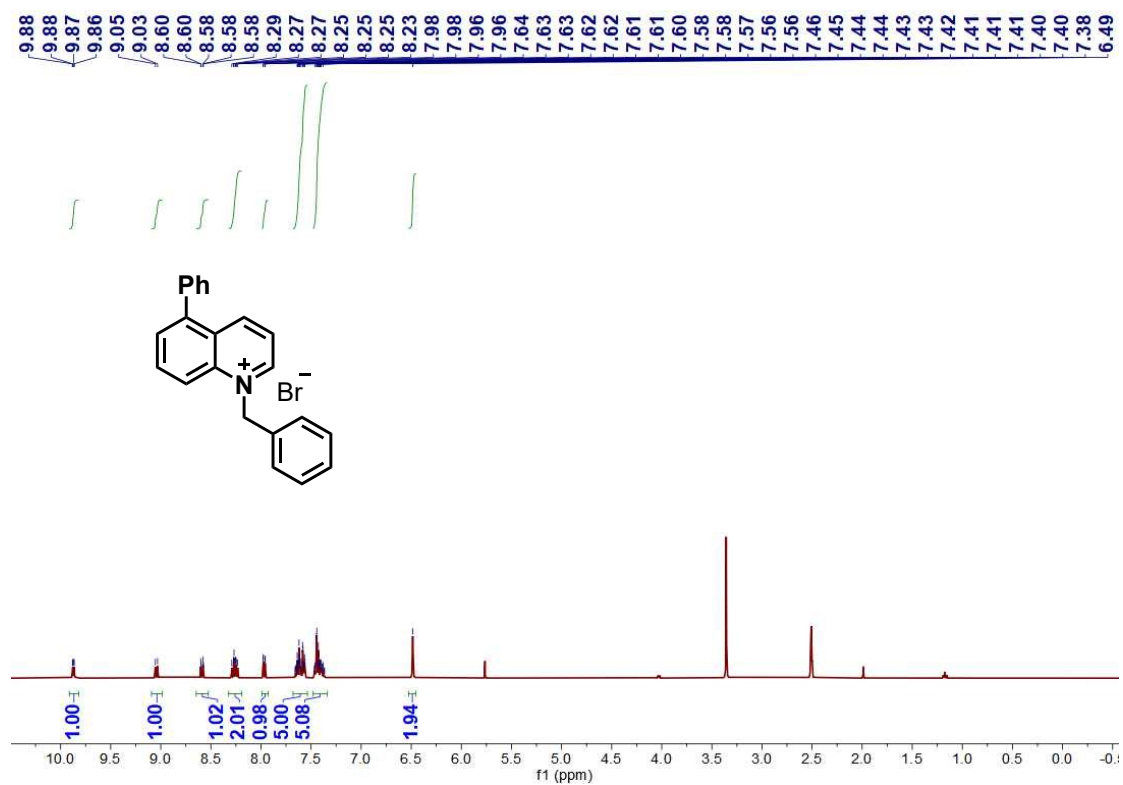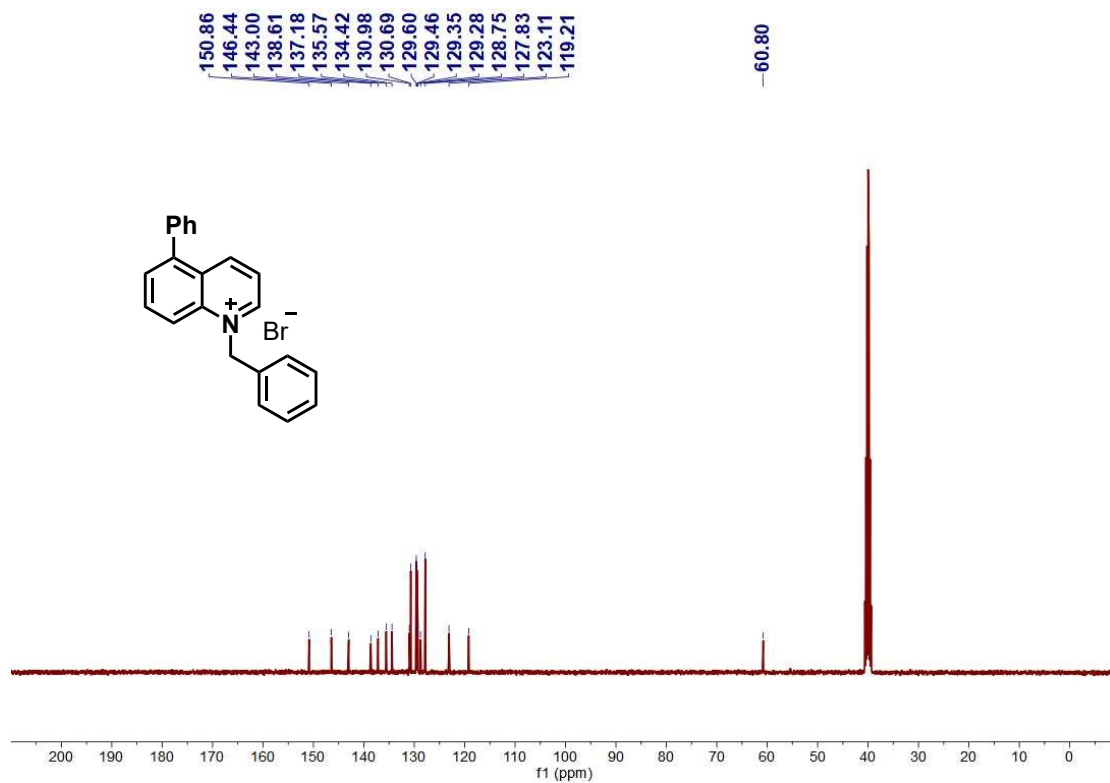

<sup>1</sup>H NMR of **1bg**

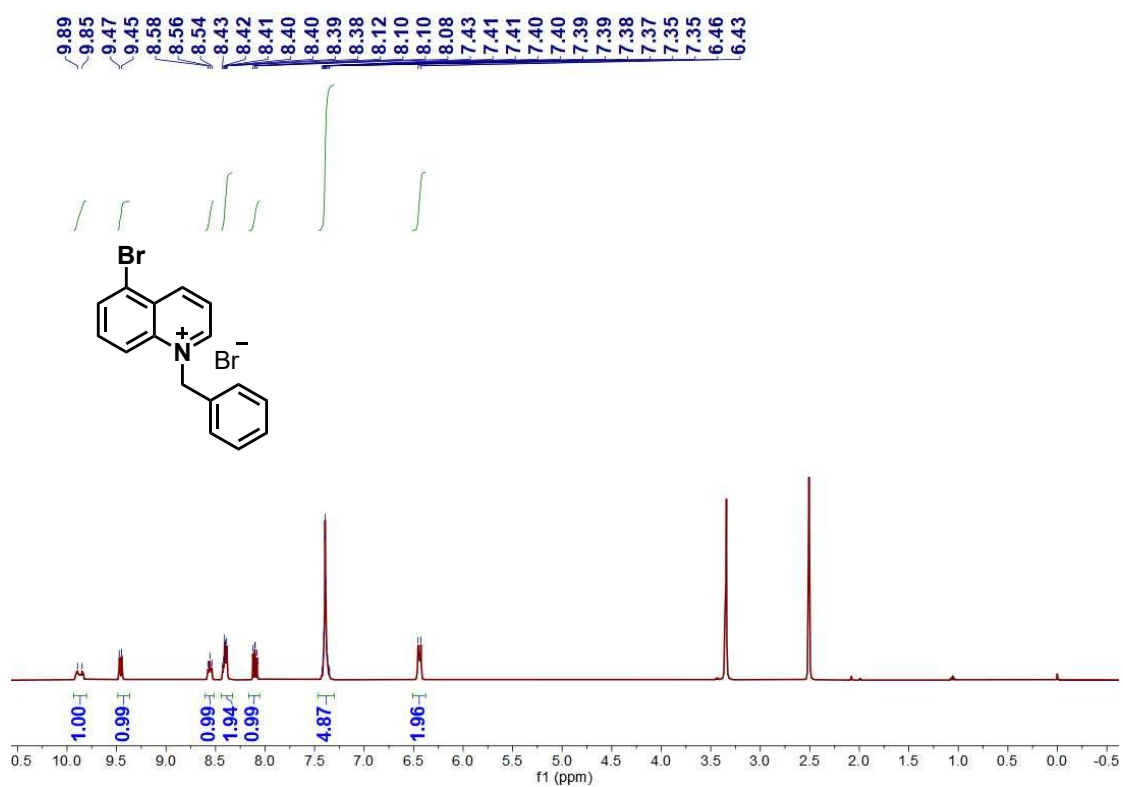

<sup>1</sup>H NMR of **1bh**

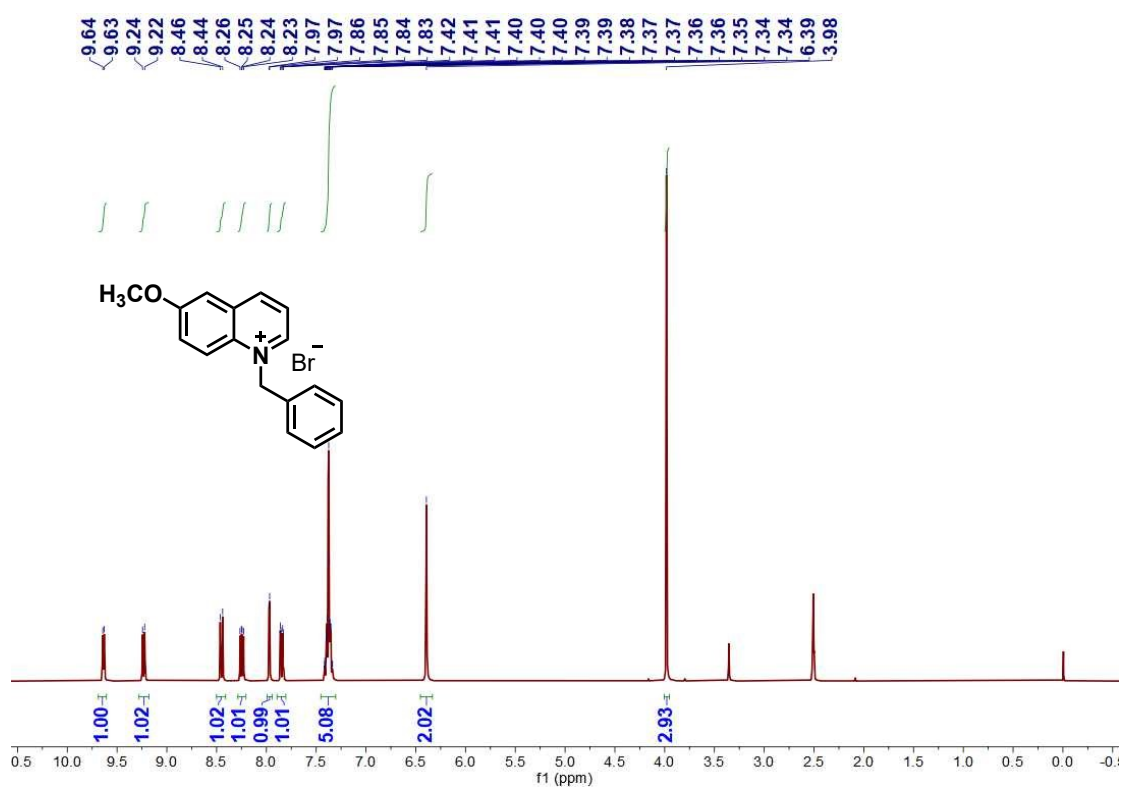

<sup>1</sup>H NMR of **1bi**

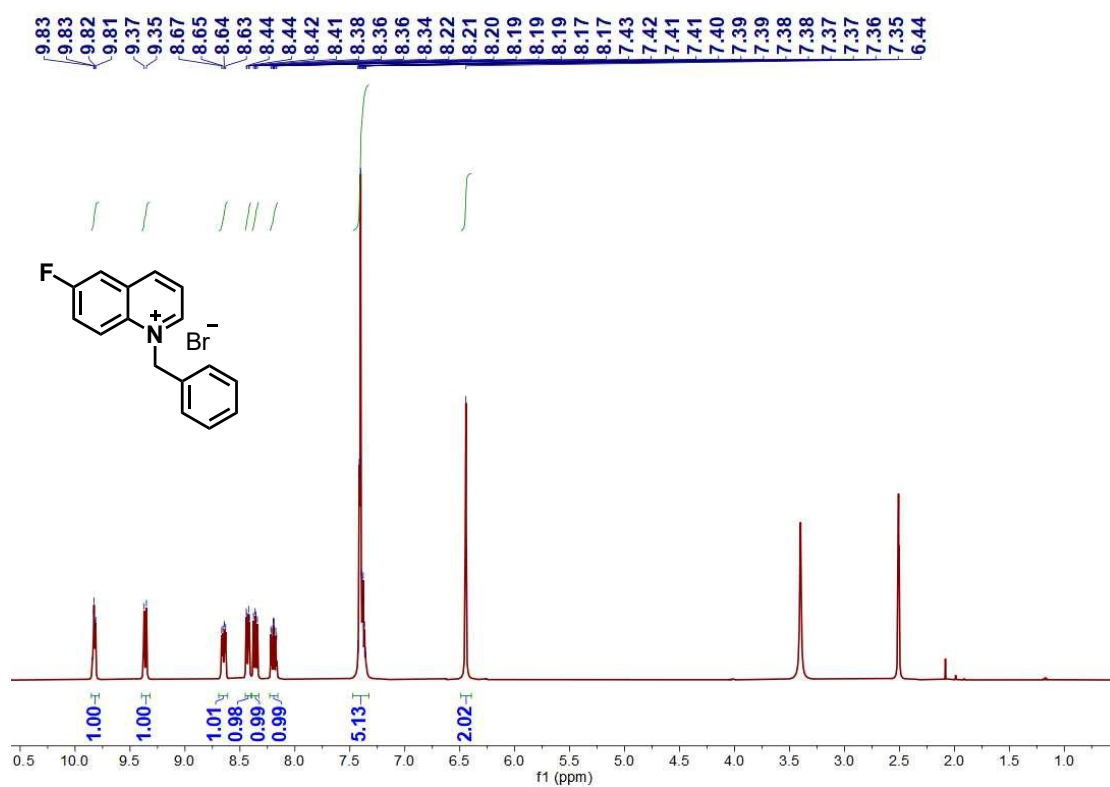

<sup>1</sup>H NMR of **1bj**

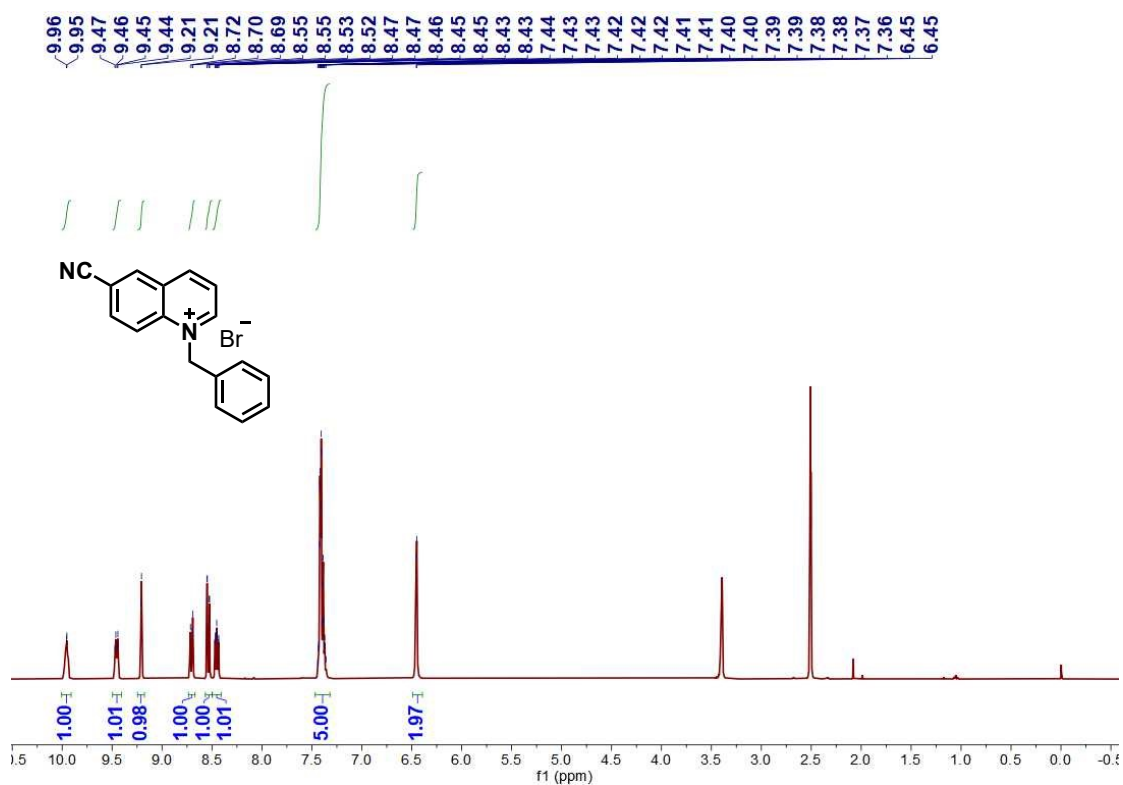



<sup>1</sup>H NMR and <sup>13</sup>C NMR of **1bk**

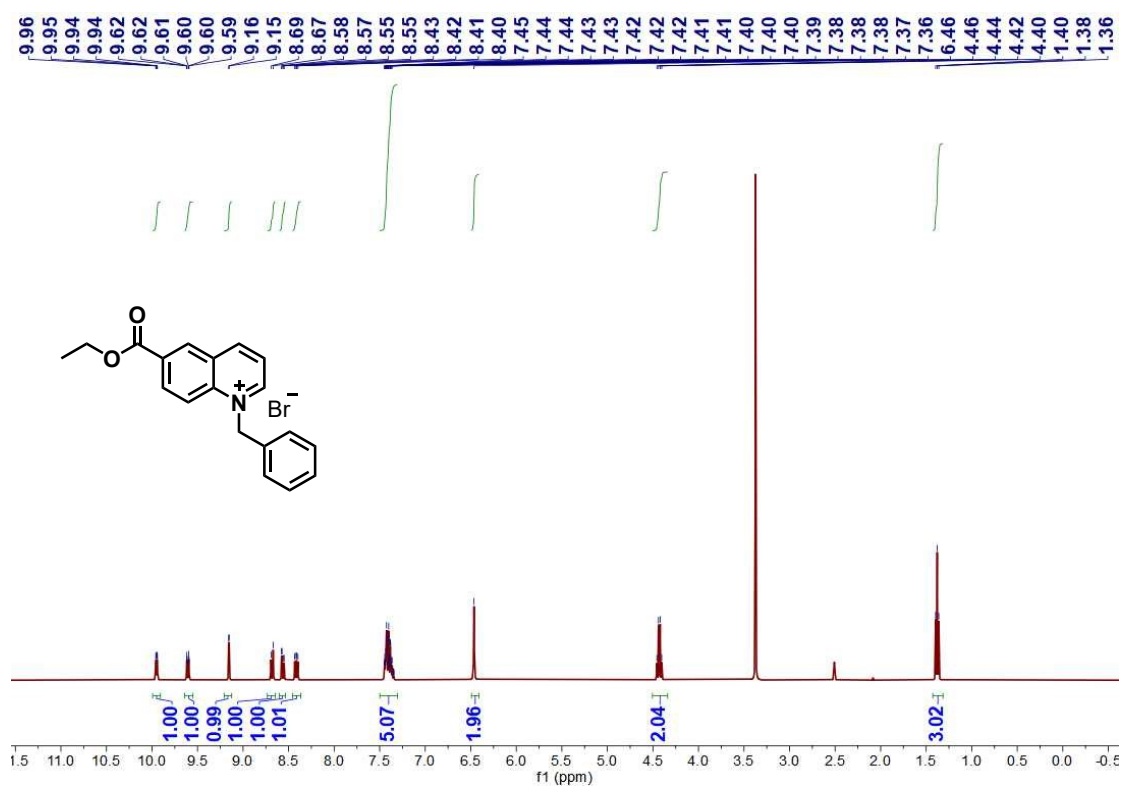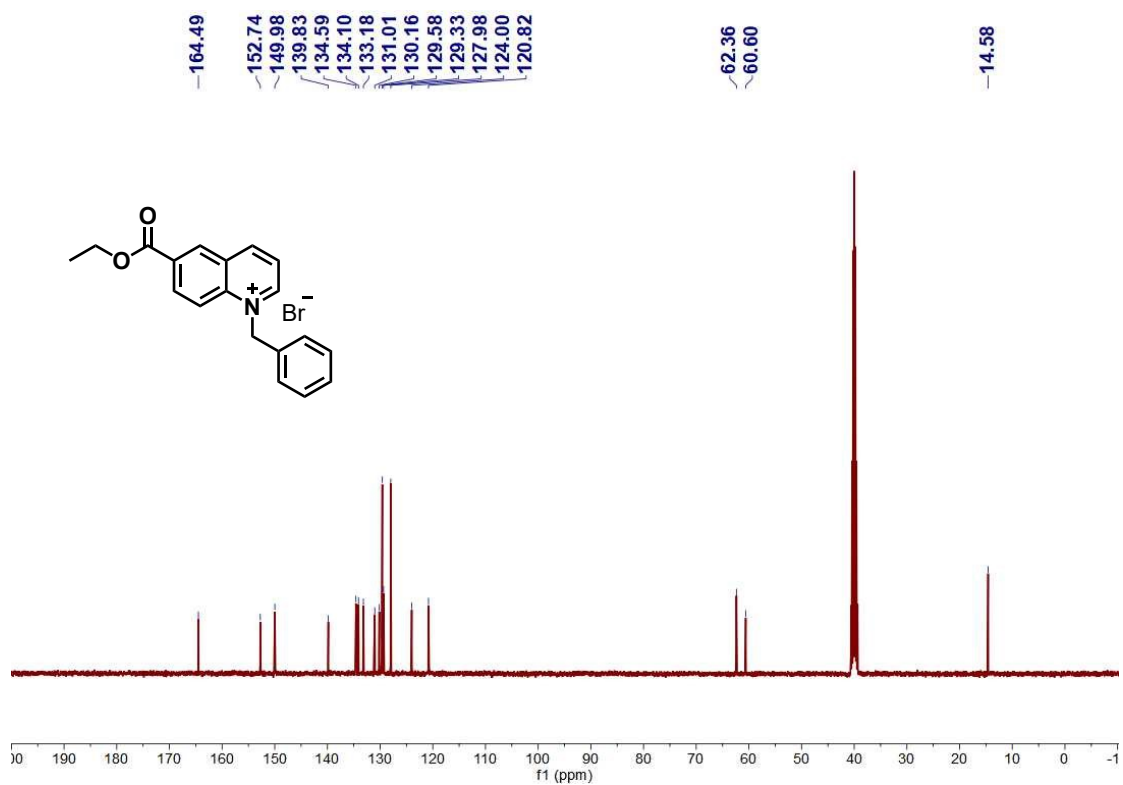

<sup>1</sup>H NMR of **1bl**

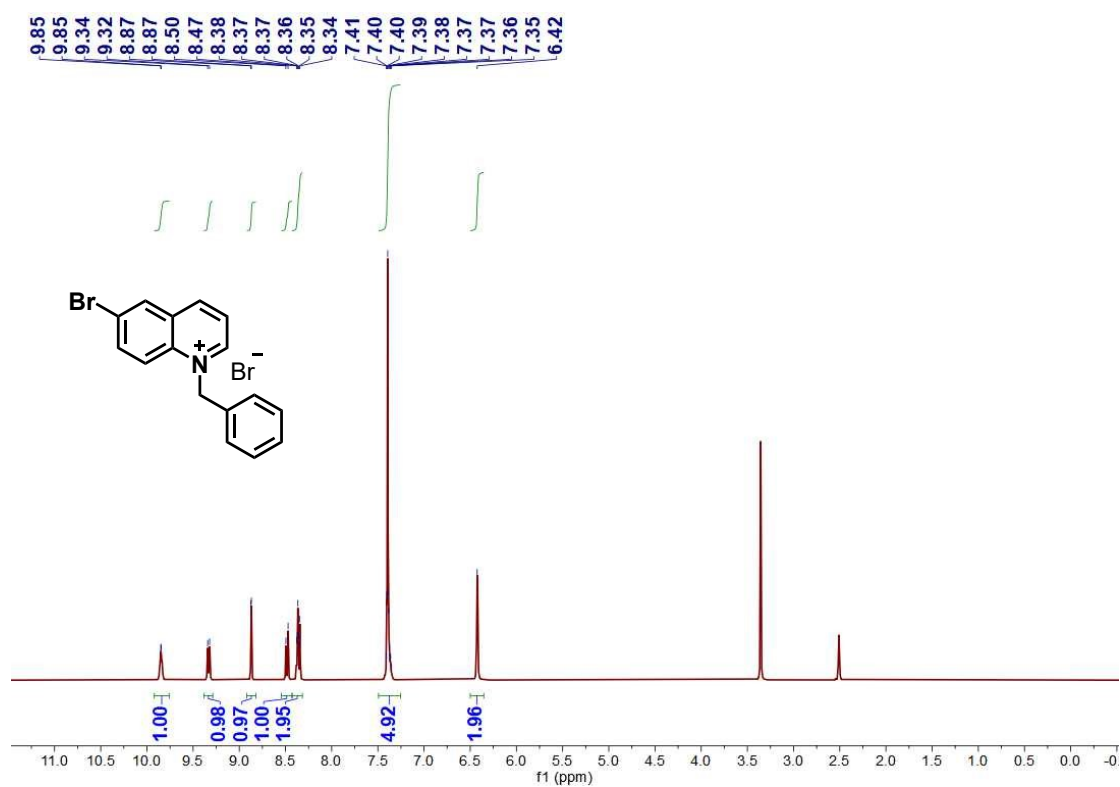

<sup>1</sup>H NMR and <sup>13</sup>C NMR of **1bm**

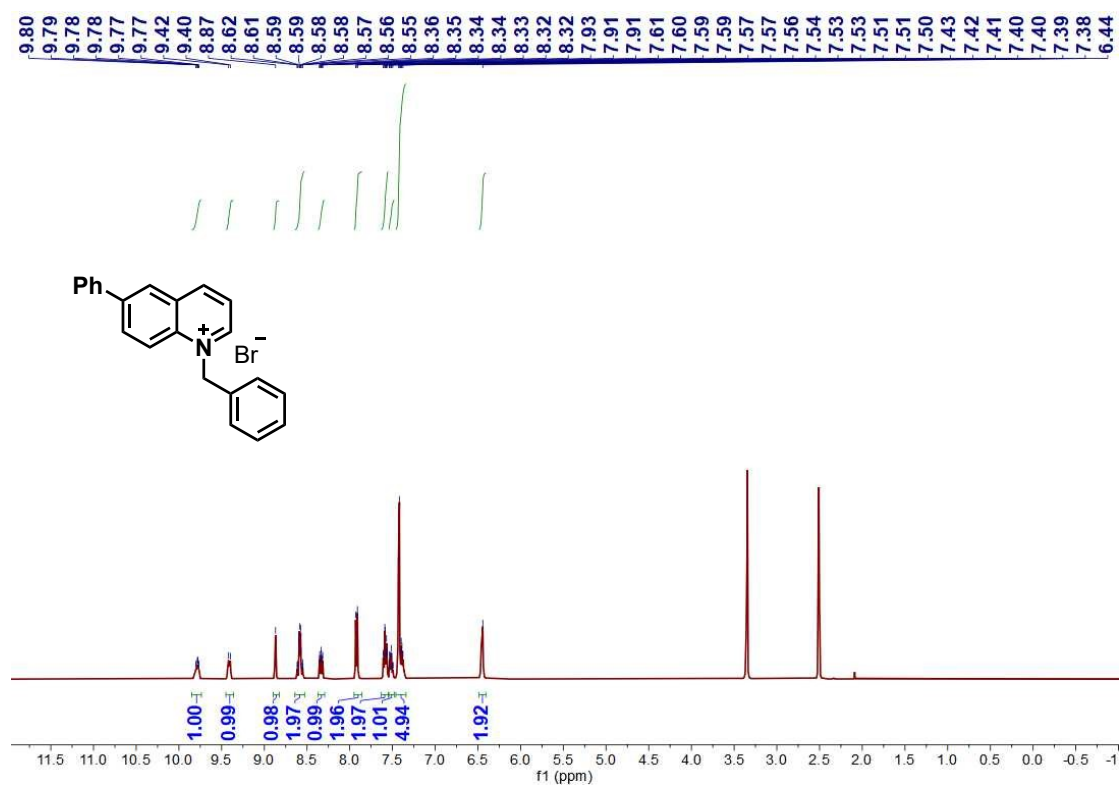

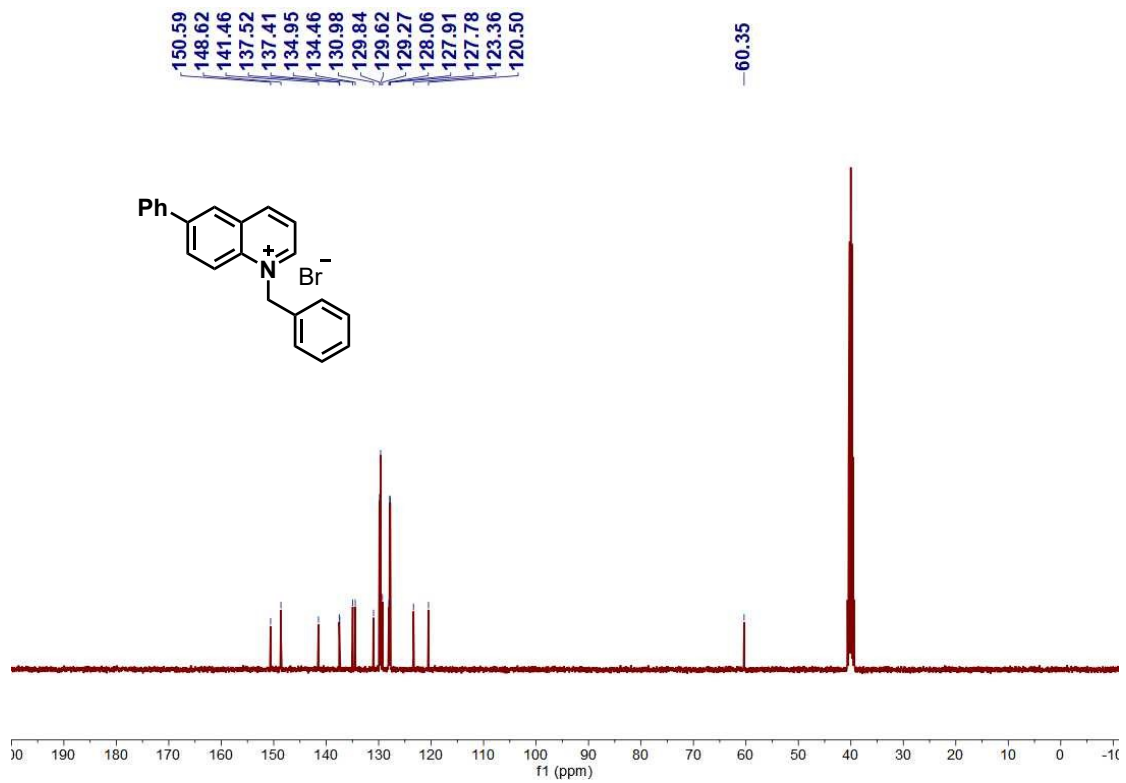

<sup>1</sup>H NMR of **1bn**

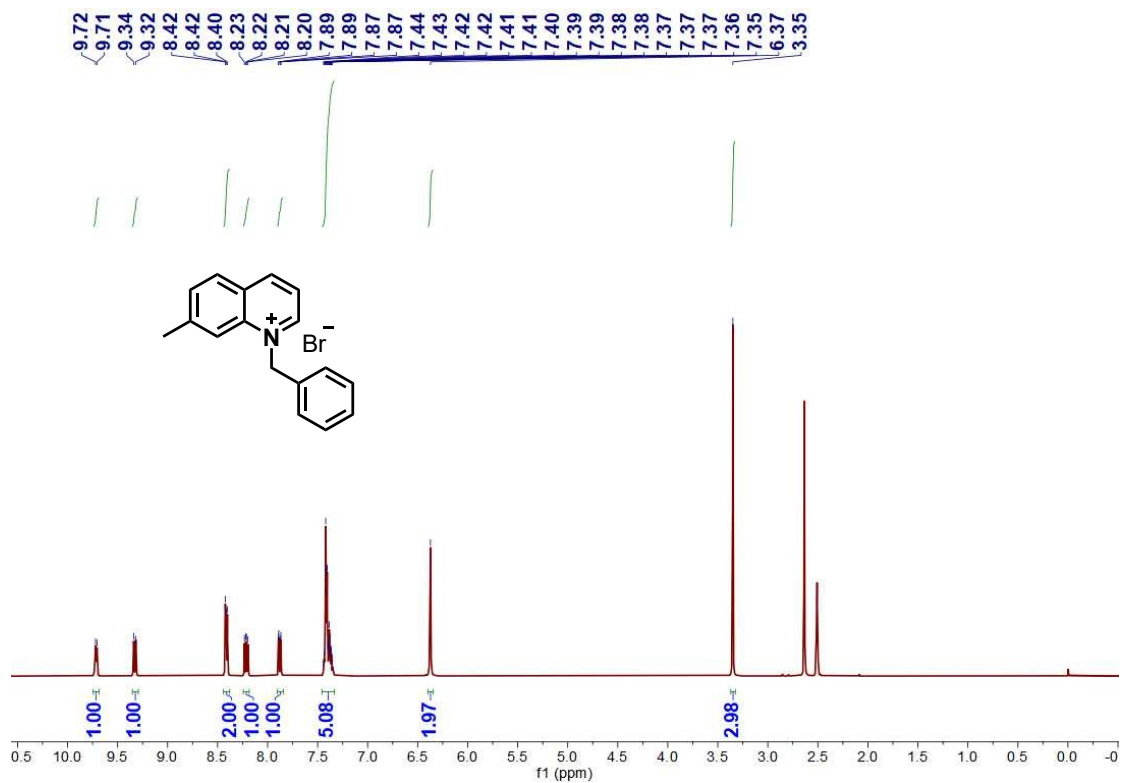

<sup>1</sup>H NMR and <sup>13</sup>C NMR of **1bo**

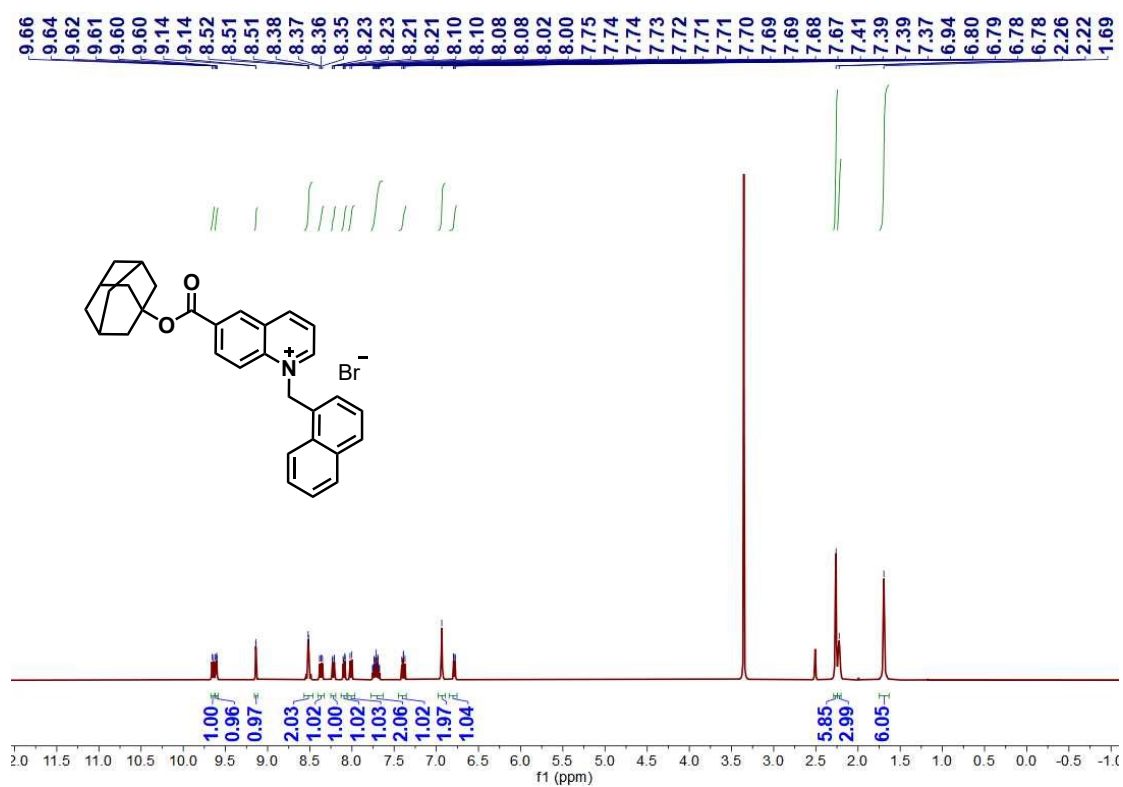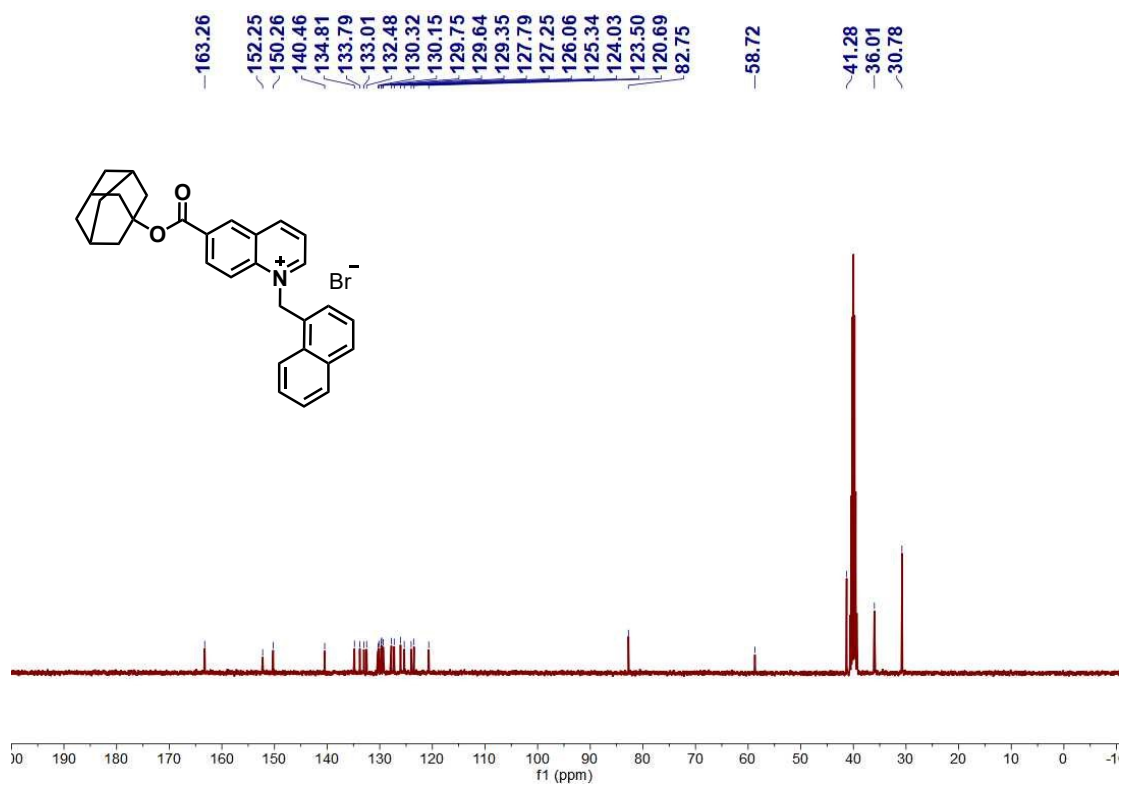

<sup>1</sup>H NMR and <sup>13</sup>C NMR of **1bp**

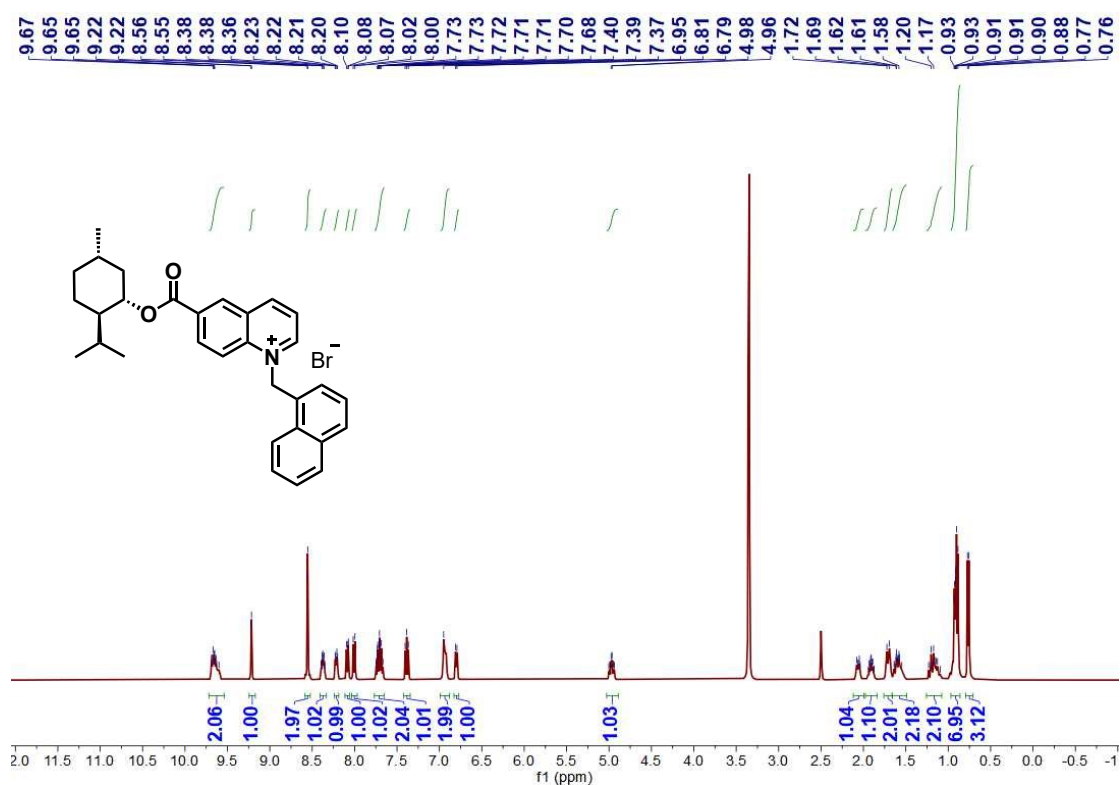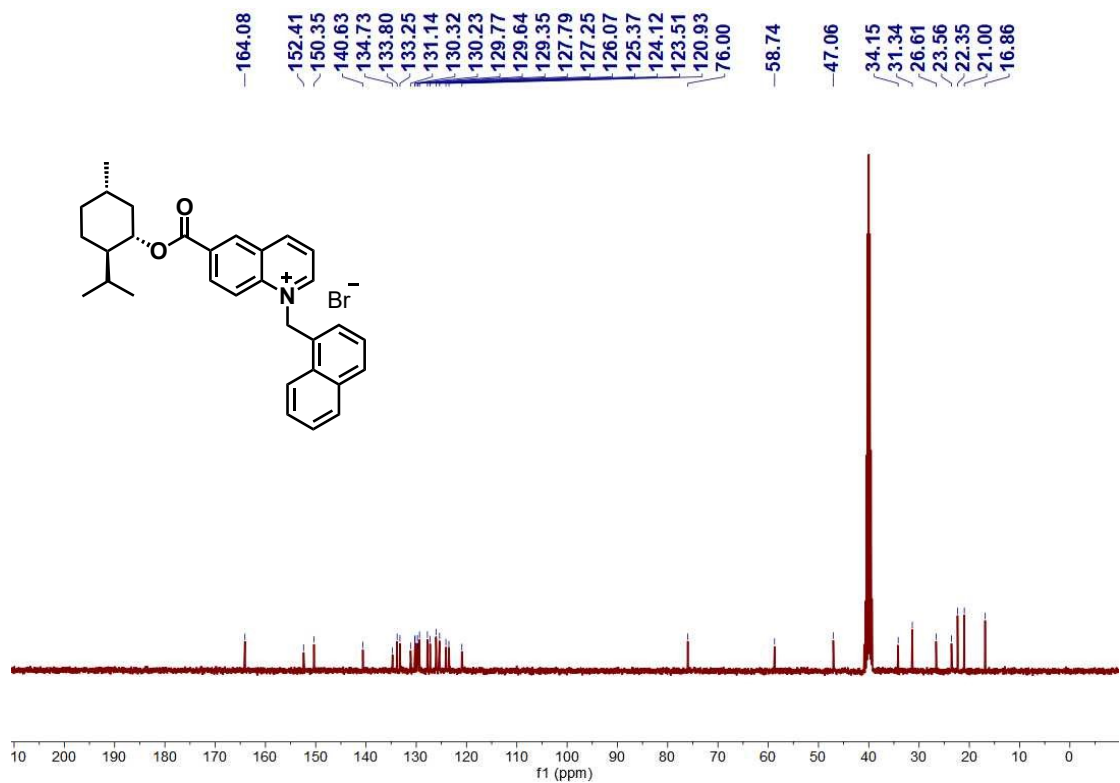

<sup>1</sup>H NMR and <sup>13</sup>C NMR of **1bq**

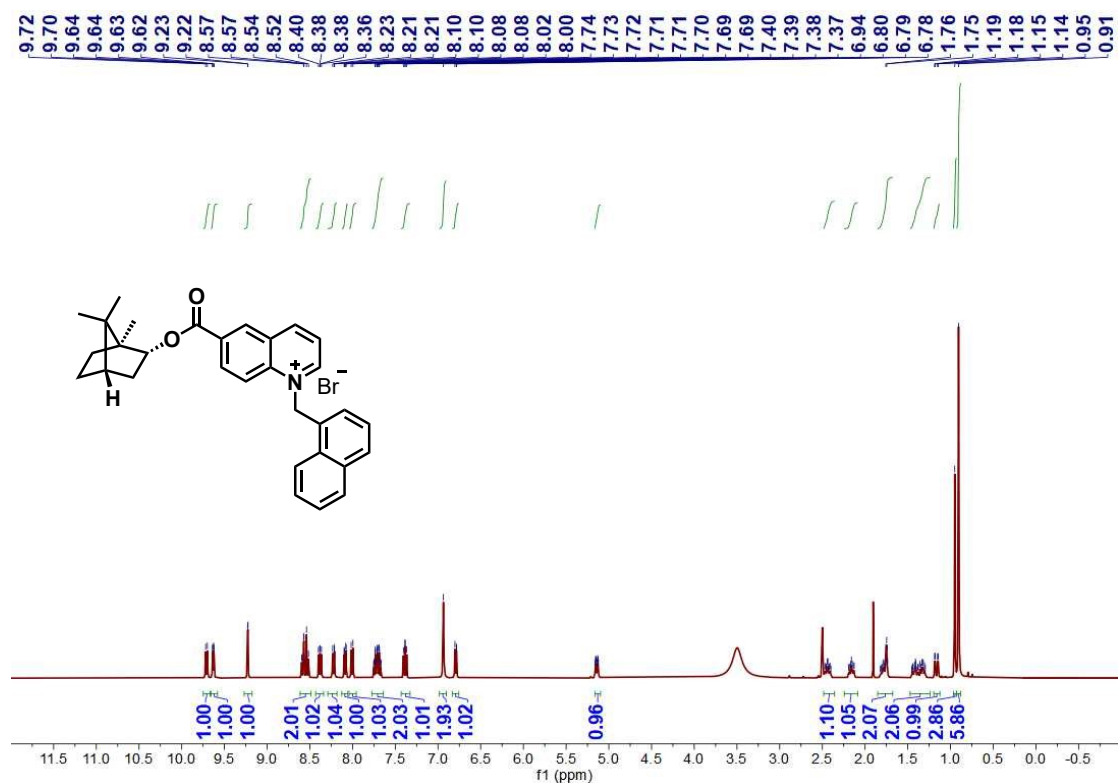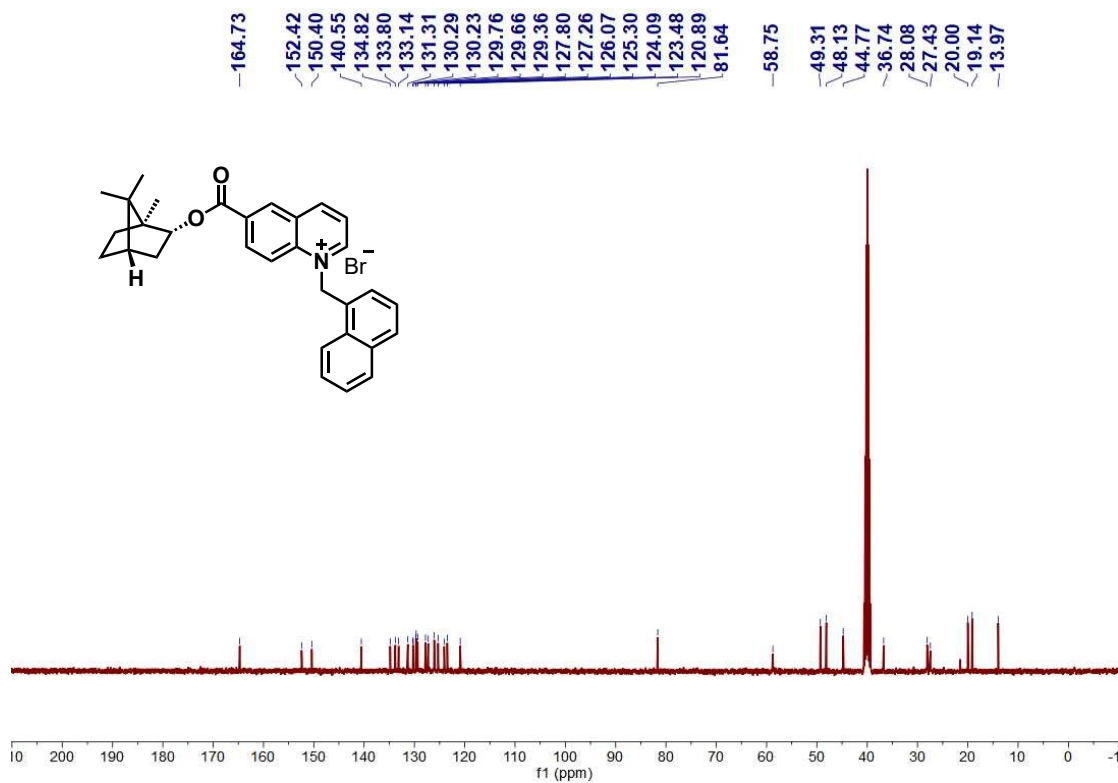

<sup>1</sup>H NMR and <sup>13</sup>C NMR of **1br**

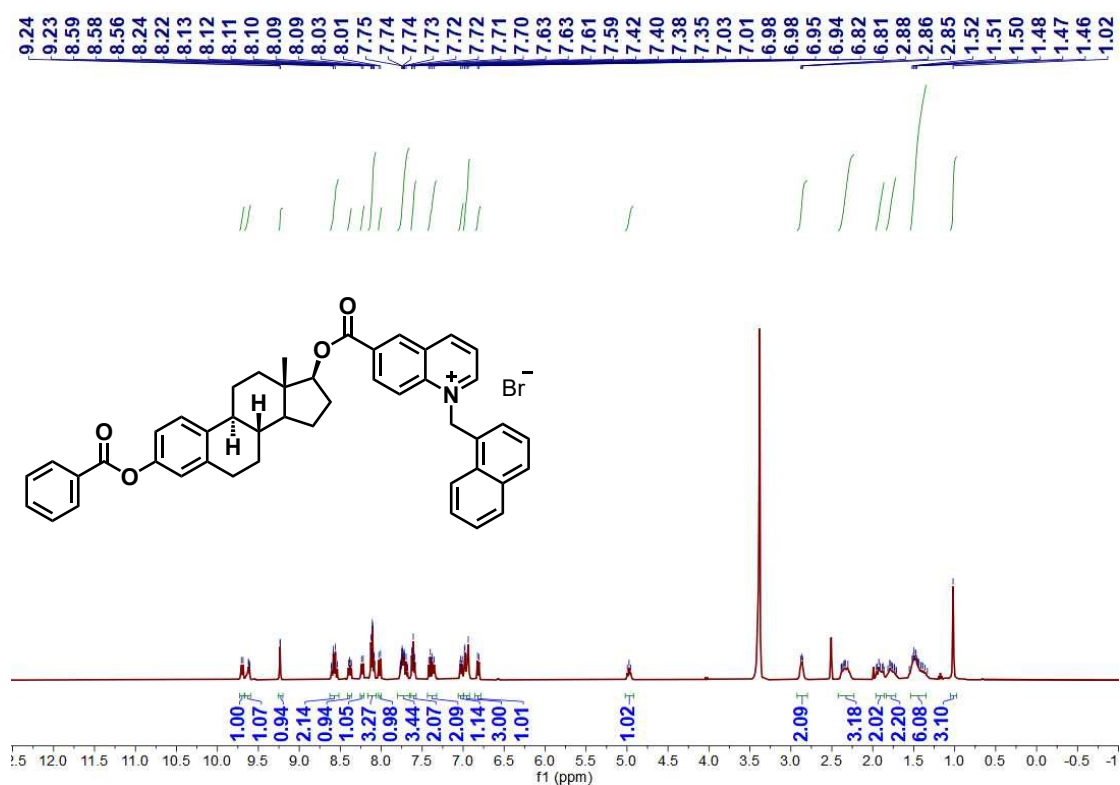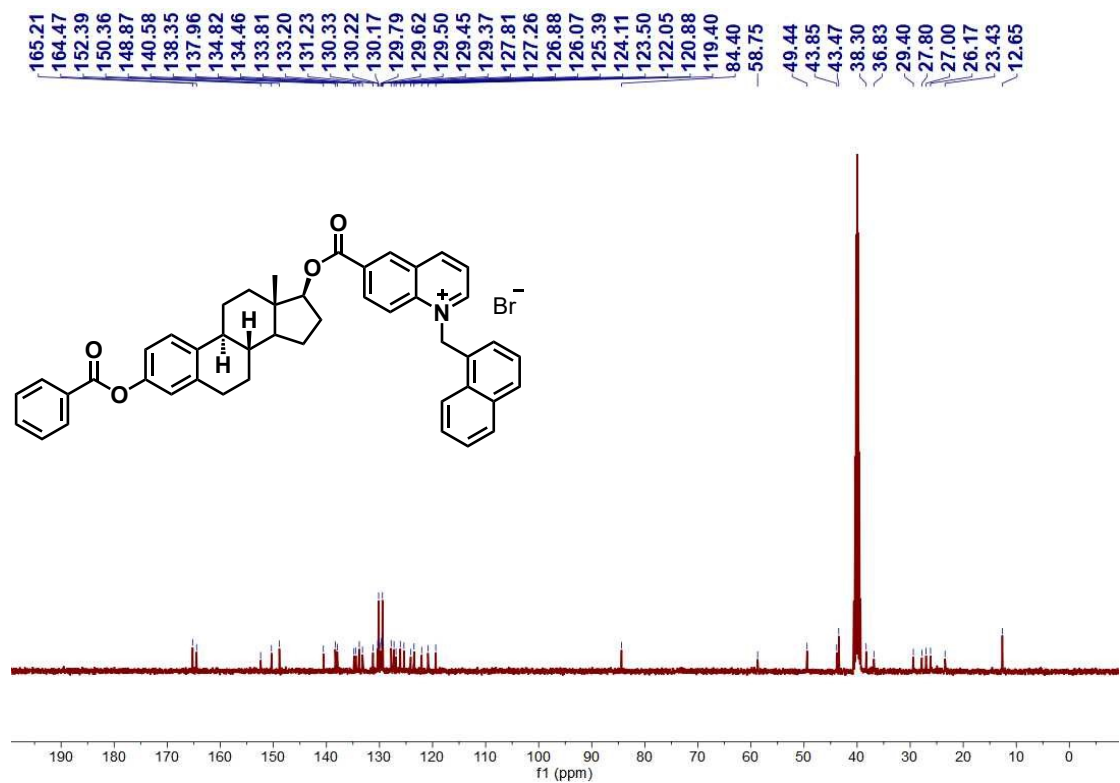

<sup>1</sup>H NMR and <sup>13</sup>C NMR of **1bs**

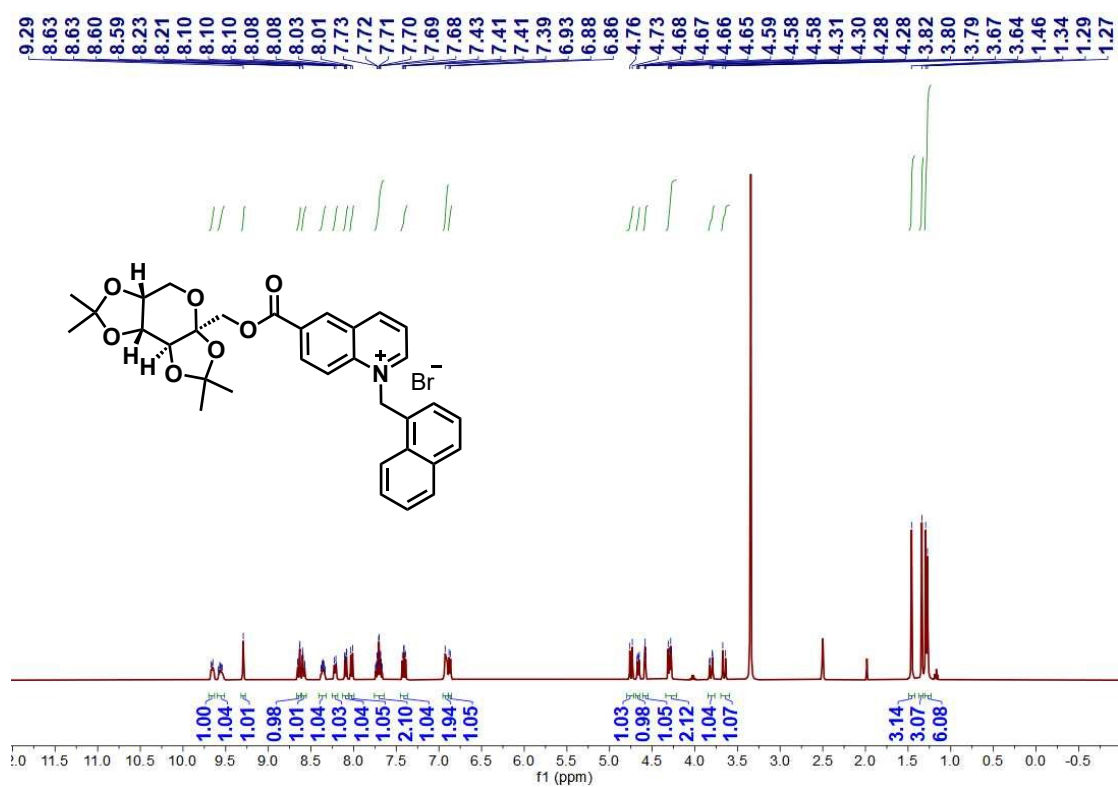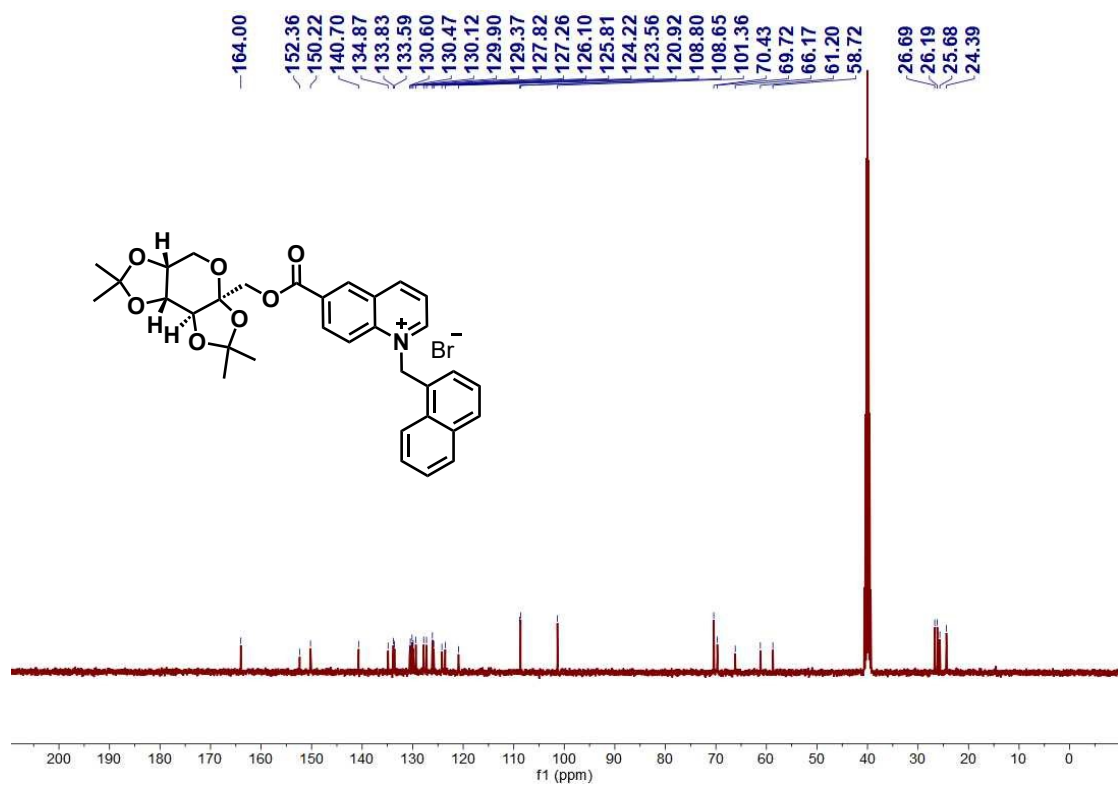



<sup>1</sup>H NMR and <sup>13</sup>C NMR of **1bt**

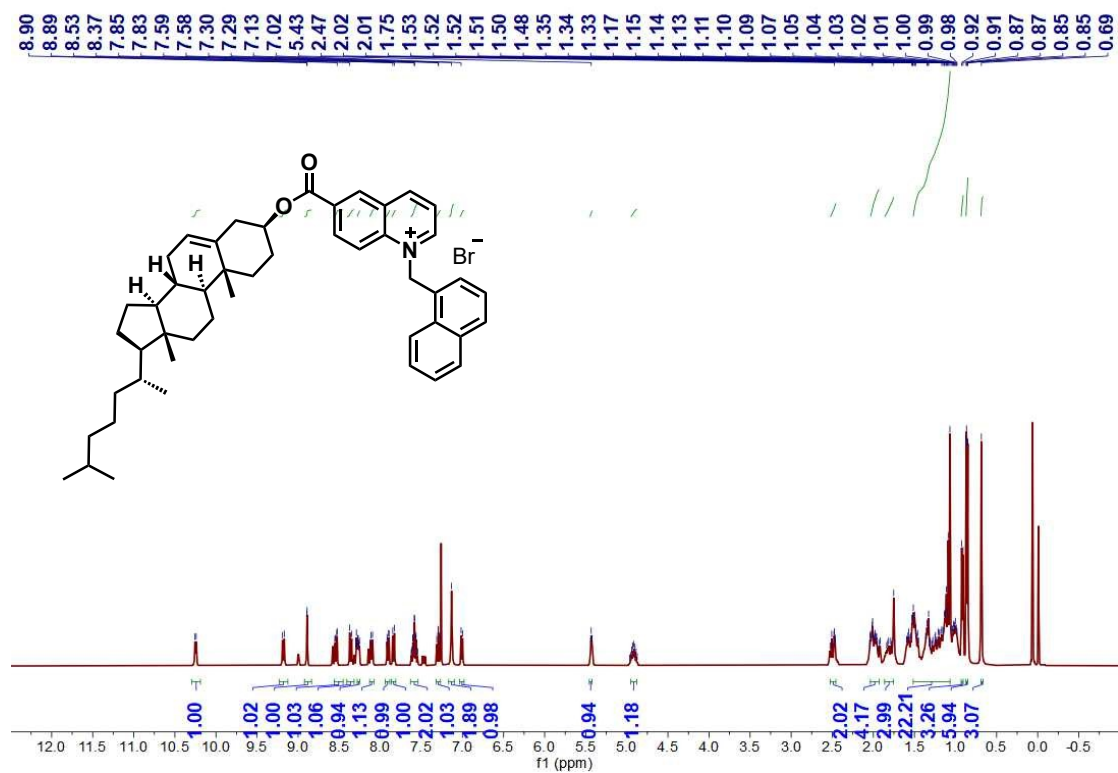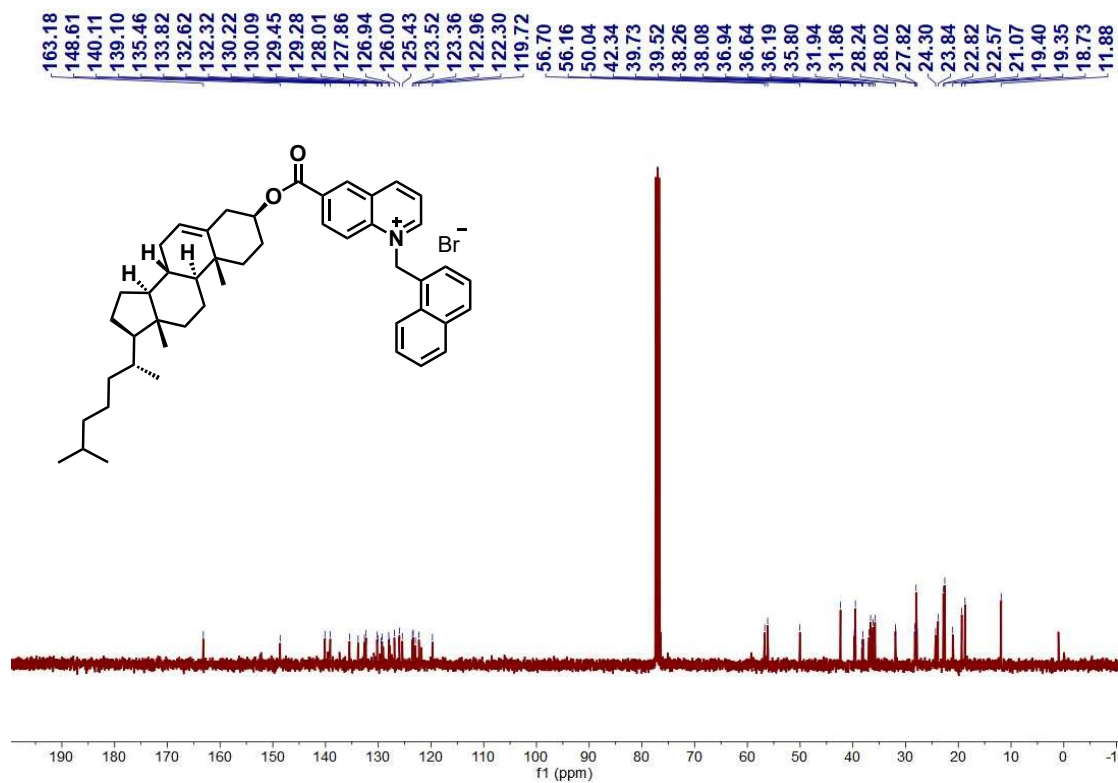

<sup>1</sup>H NMR and <sup>13</sup>C NMR of **1bu**

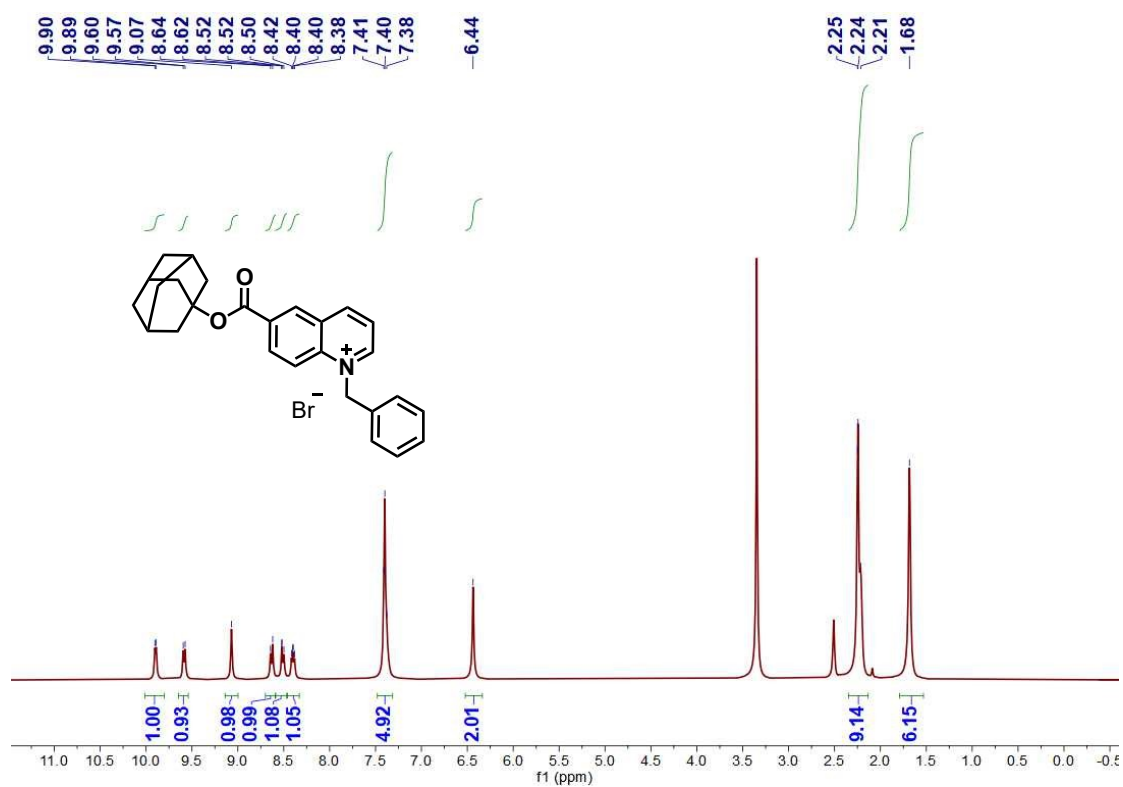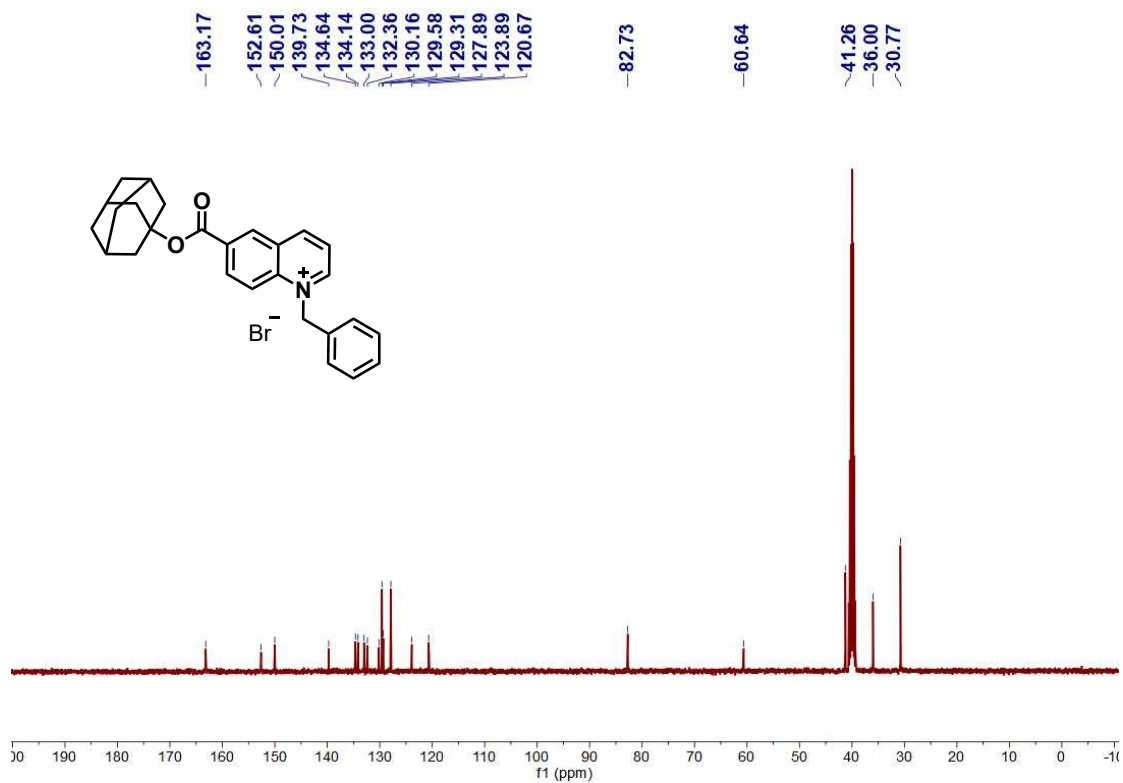

<sup>1</sup>H NMR and <sup>13</sup>C NMR of **1bv**

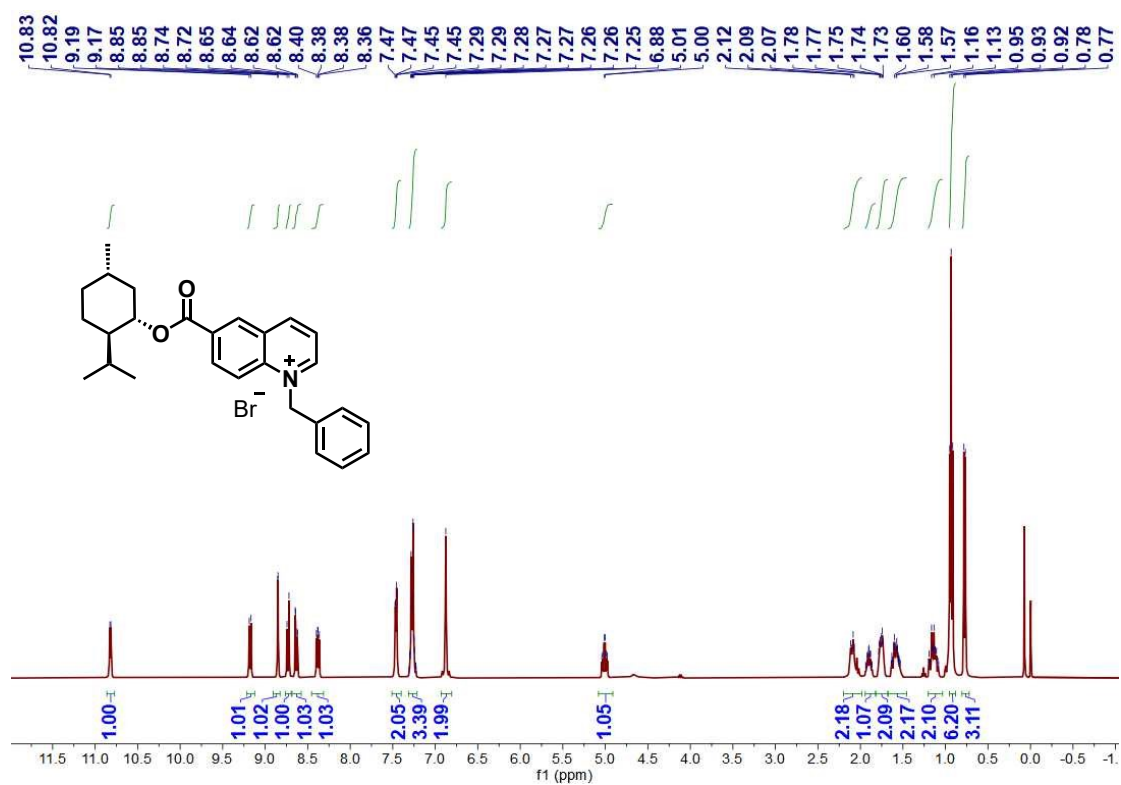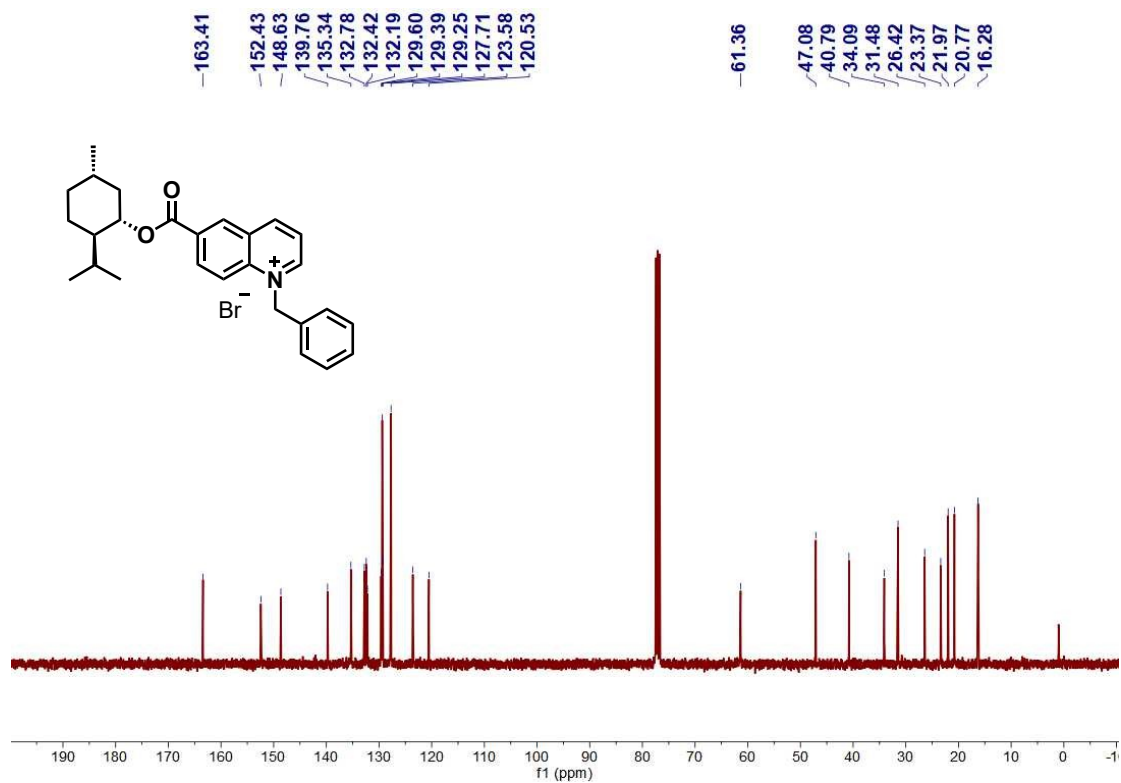

<sup>1</sup>H NMR and <sup>13</sup>C NMR of **1bw**

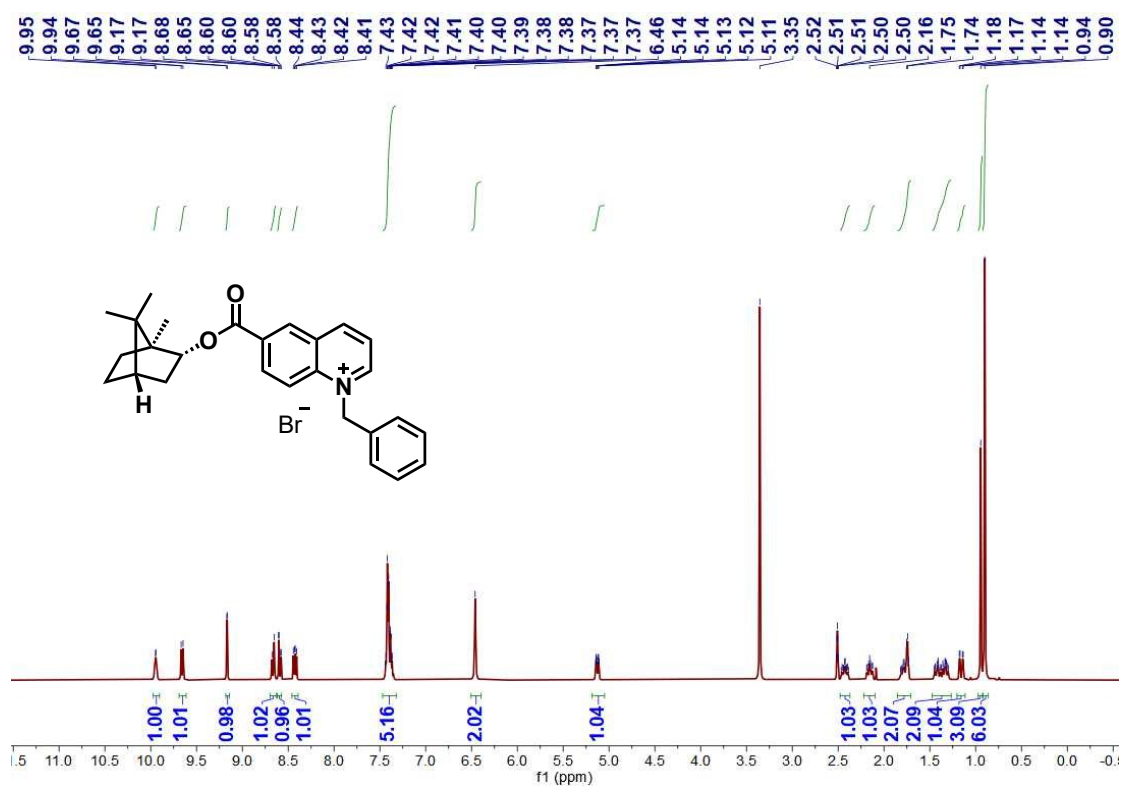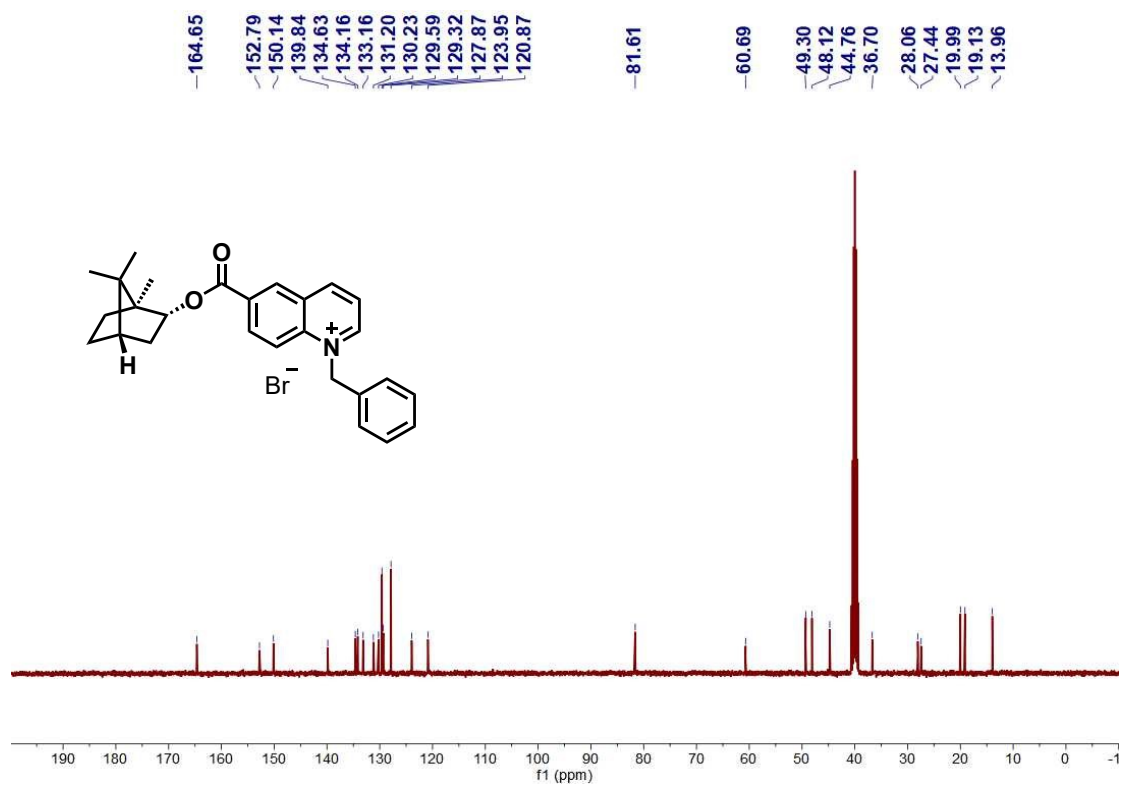

<sup>1</sup>H NMR and <sup>13</sup>C NMR of **1bx**

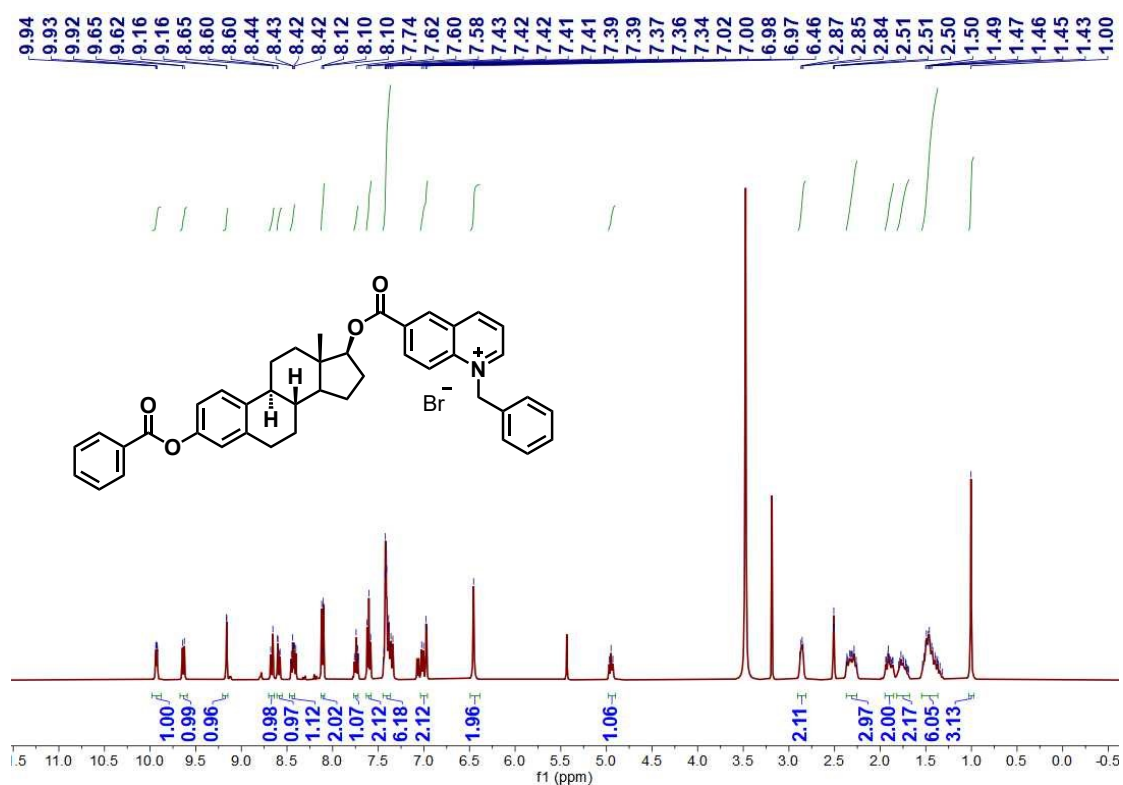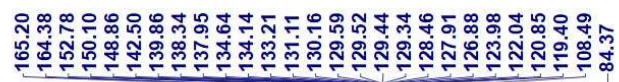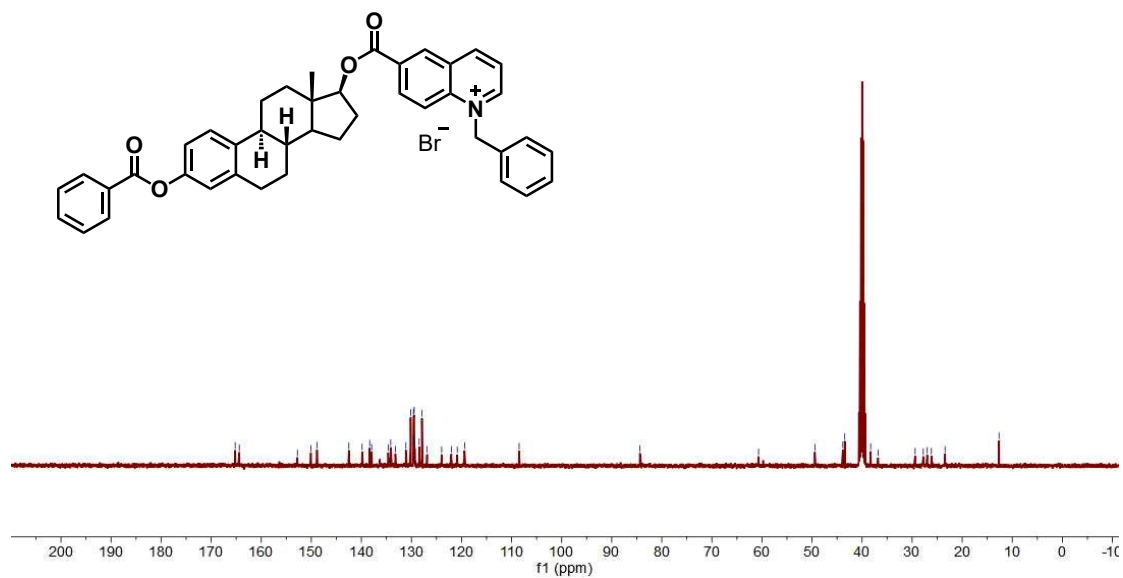

<sup>1</sup>H NMR and <sup>13</sup>C NMR of **1by**

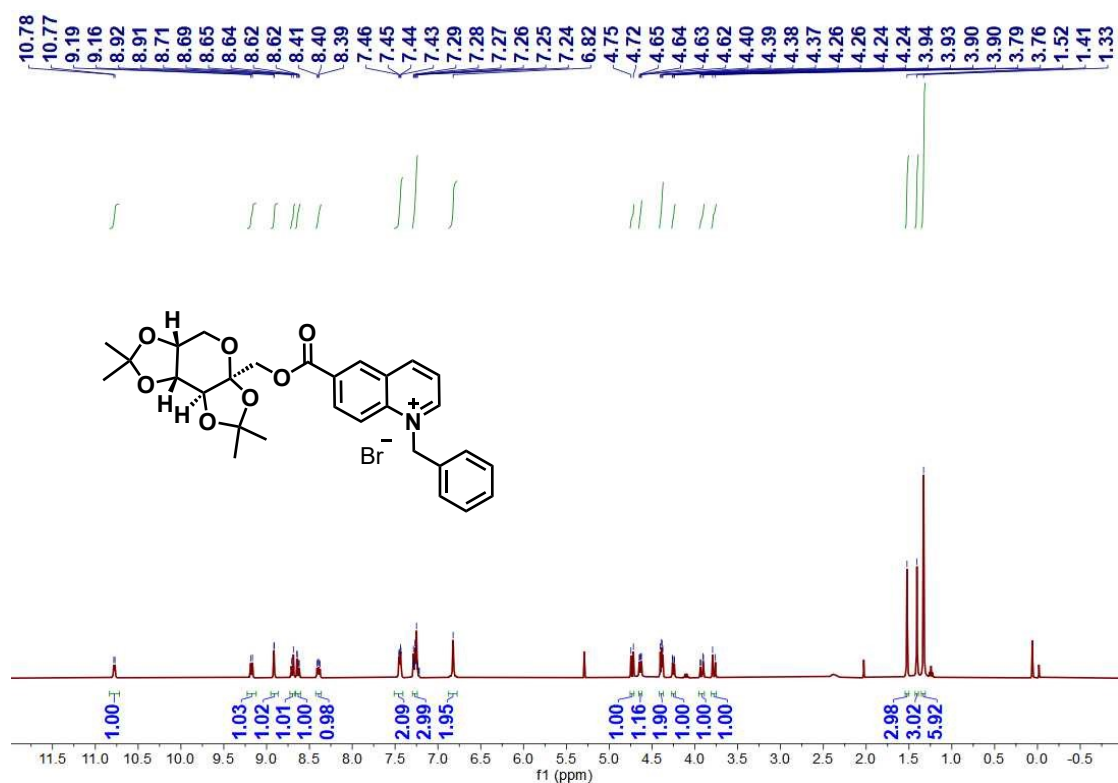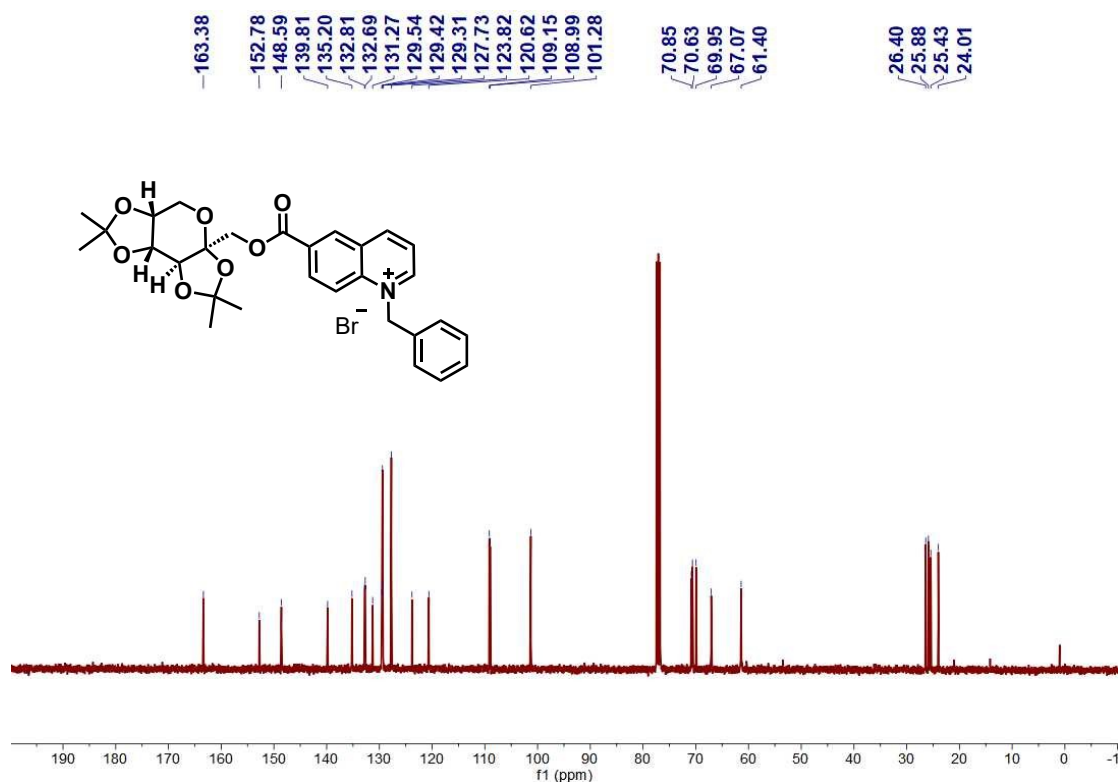

<sup>1</sup>H NMR and <sup>13</sup>C NMR of **1bz**

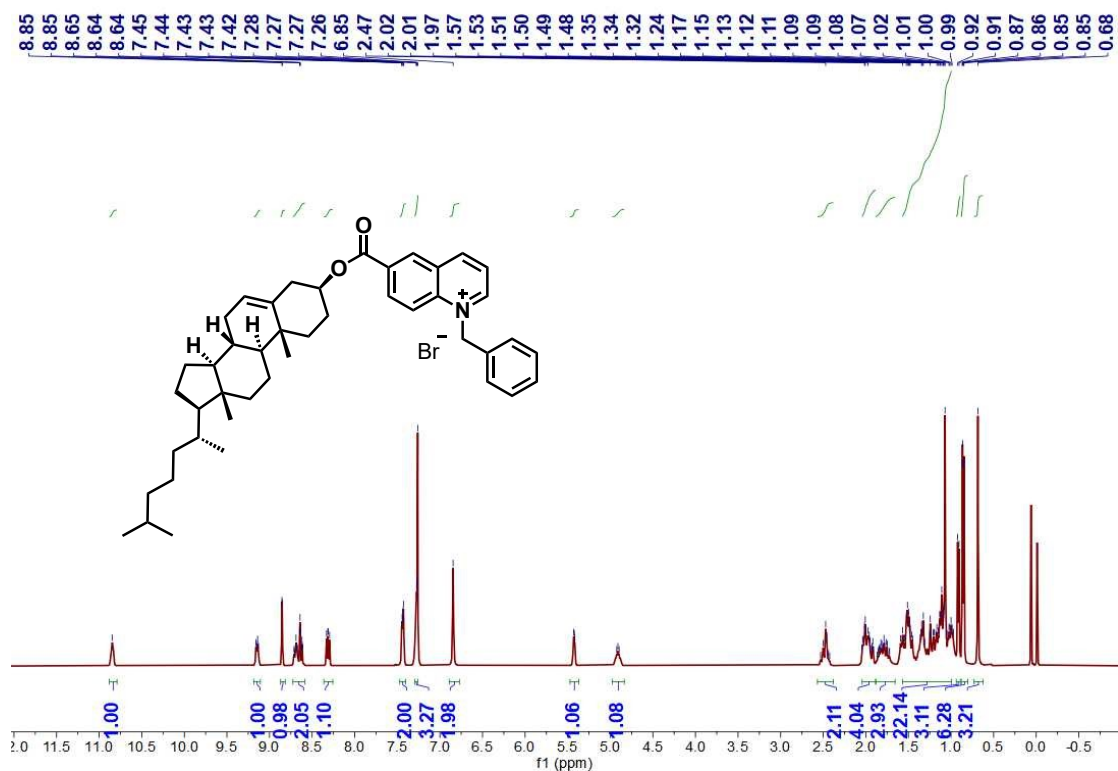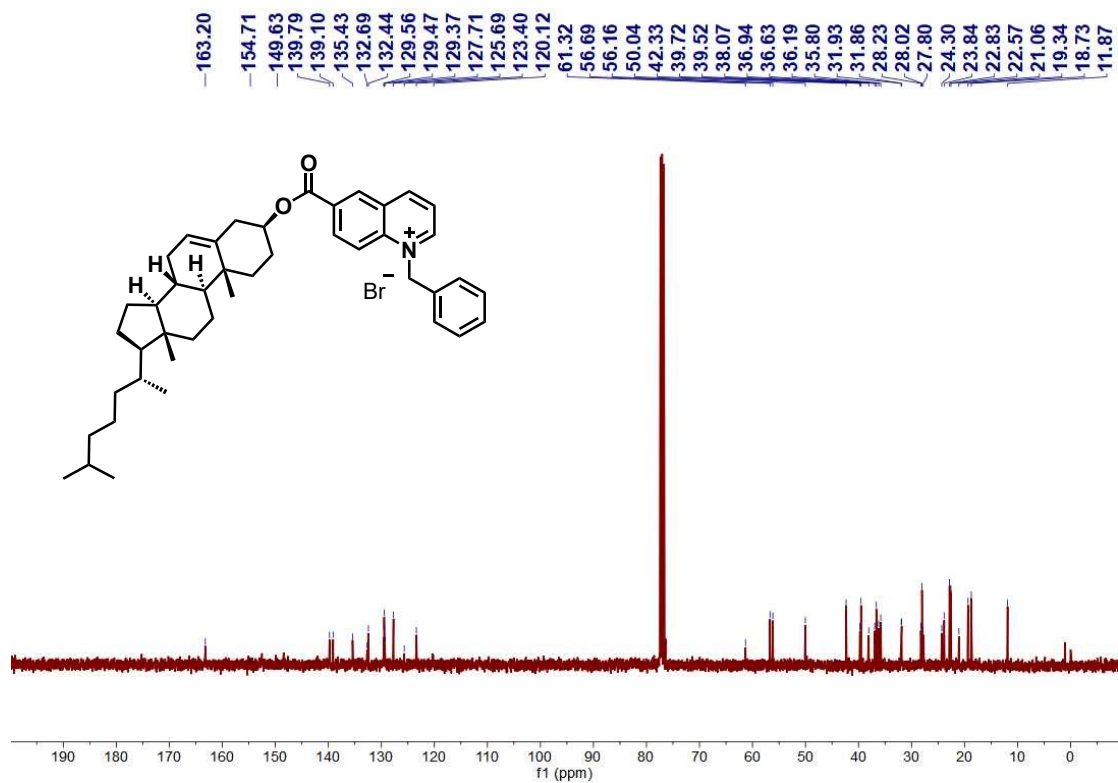

<sup>1</sup>H NMR of **3a**

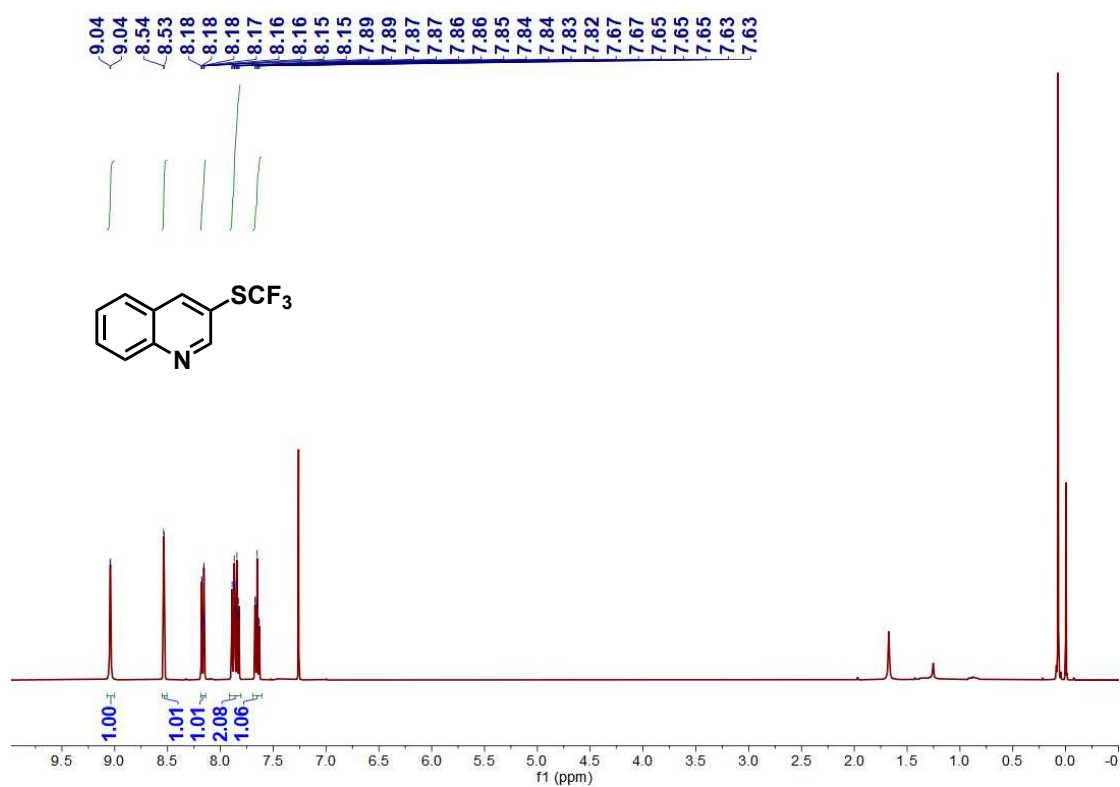

<sup>1</sup>H NMR, <sup>13</sup>C NMR and <sup>19</sup>F NMR of **3b**

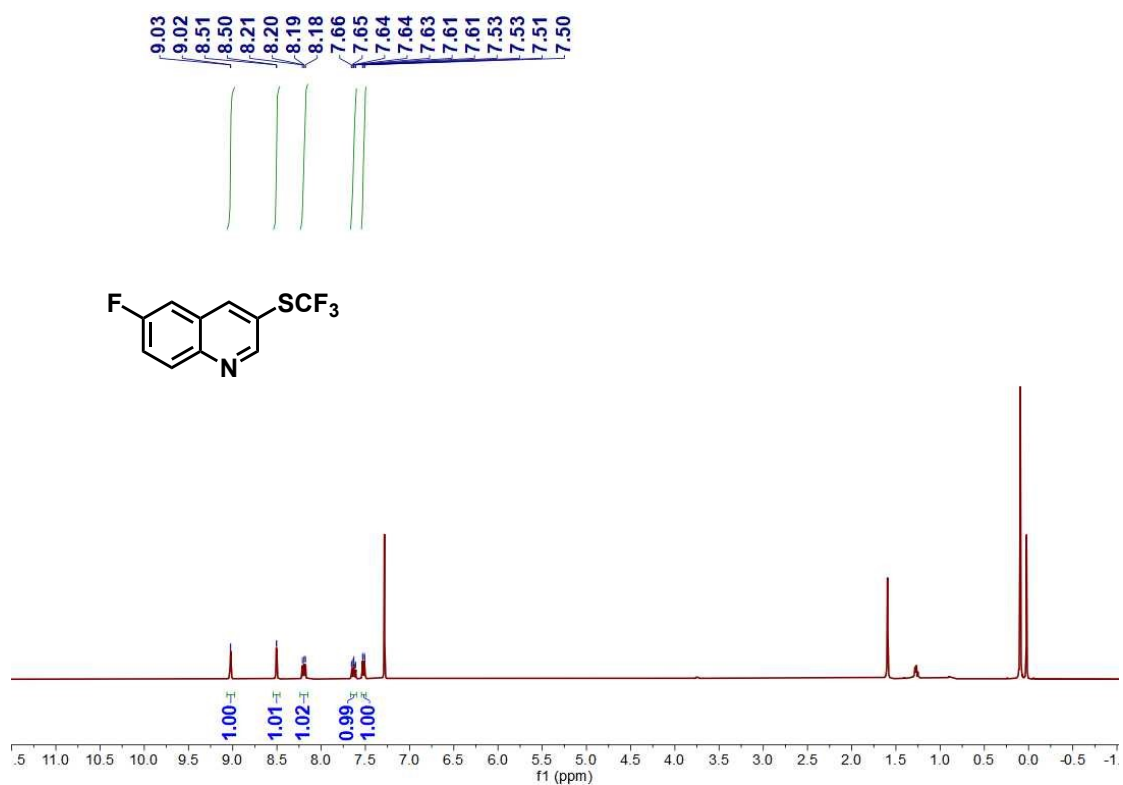



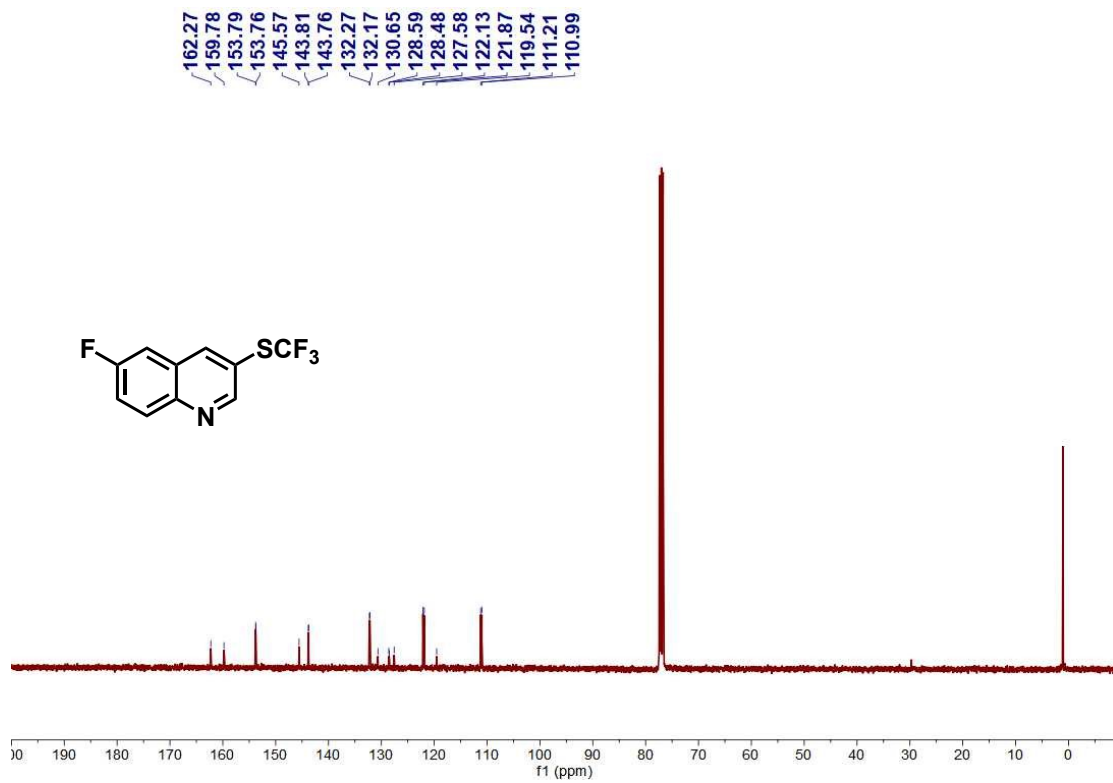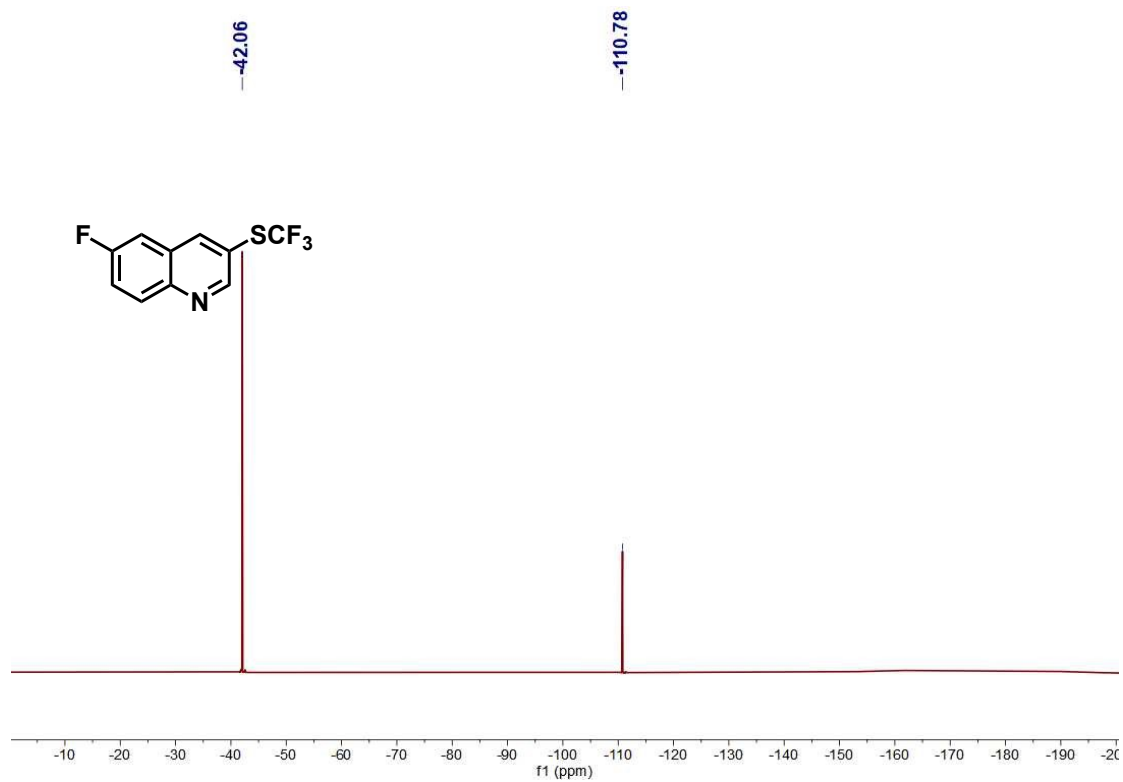

<sup>1</sup>H NMR, <sup>13</sup>C NMR and <sup>19</sup>F NMR of **3c**

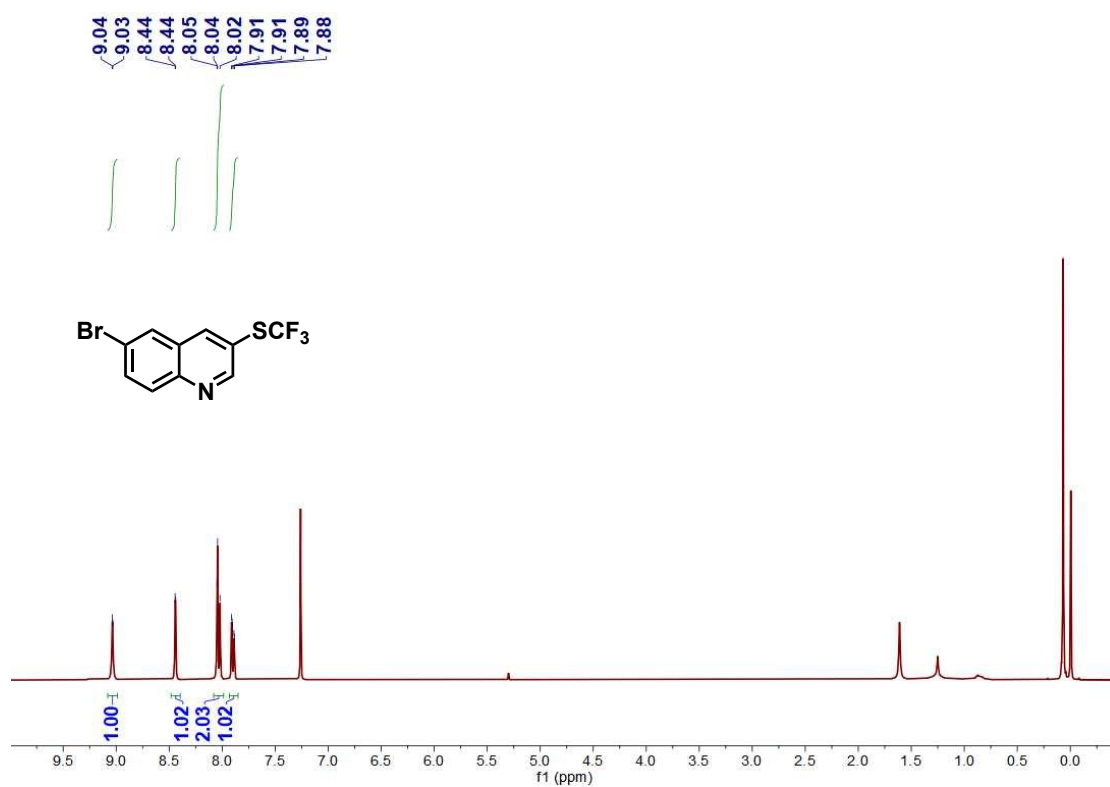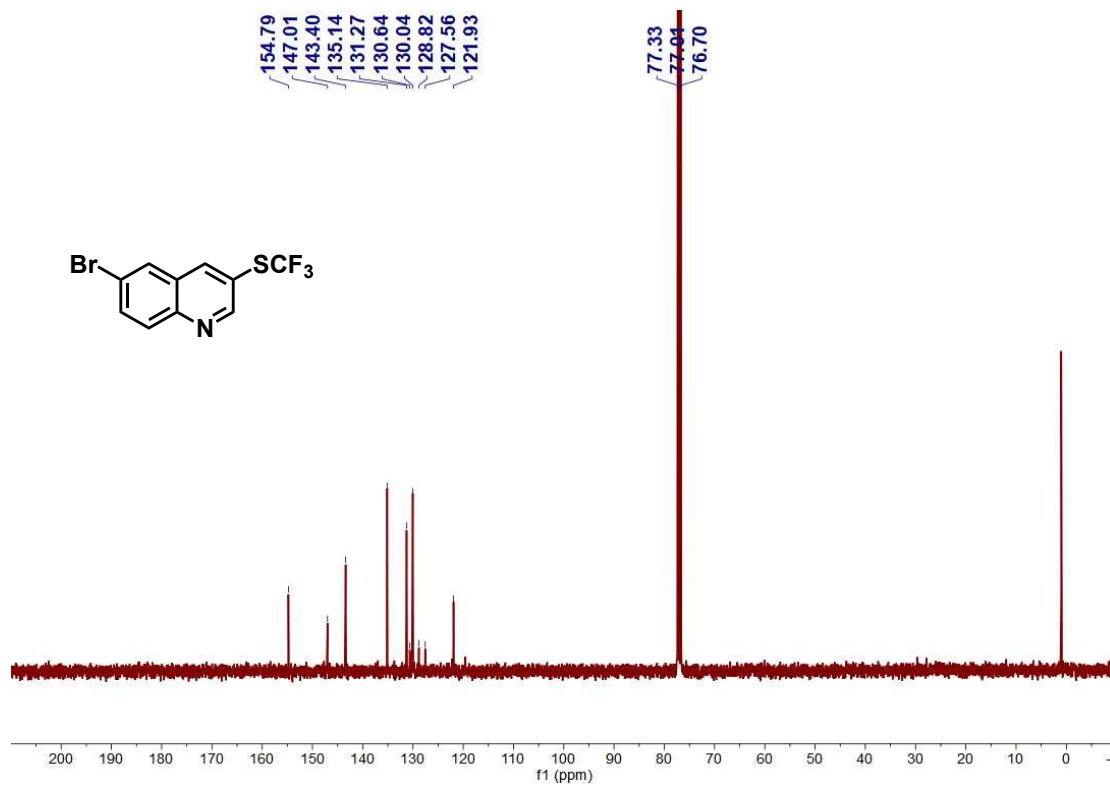

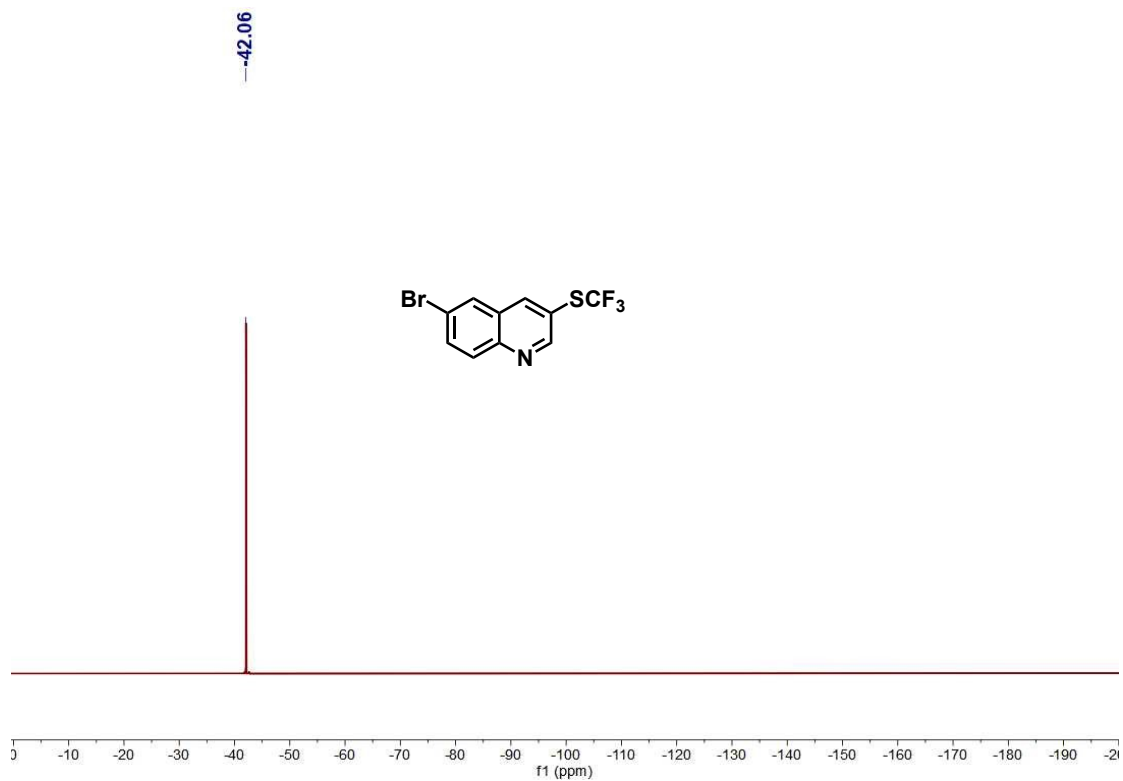

$^1\text{H}$  NMR,  $^{13}\text{C}$  NMR and  $^{19}\text{F}$  NMR of **3d**

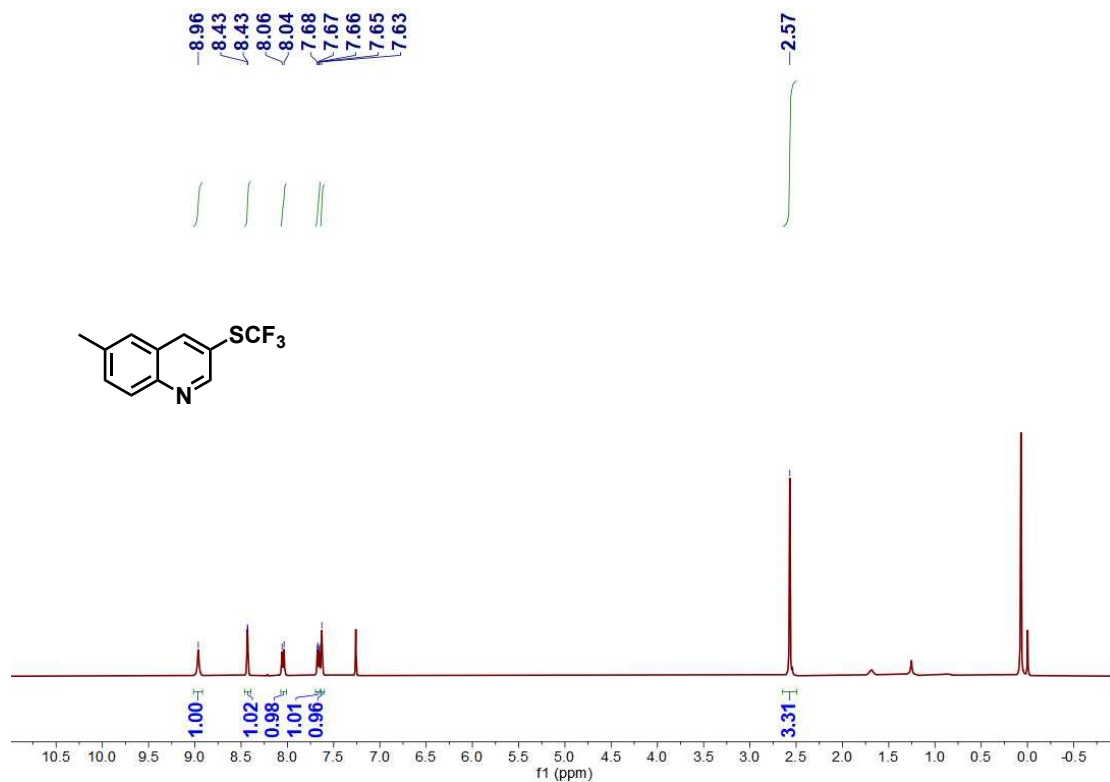

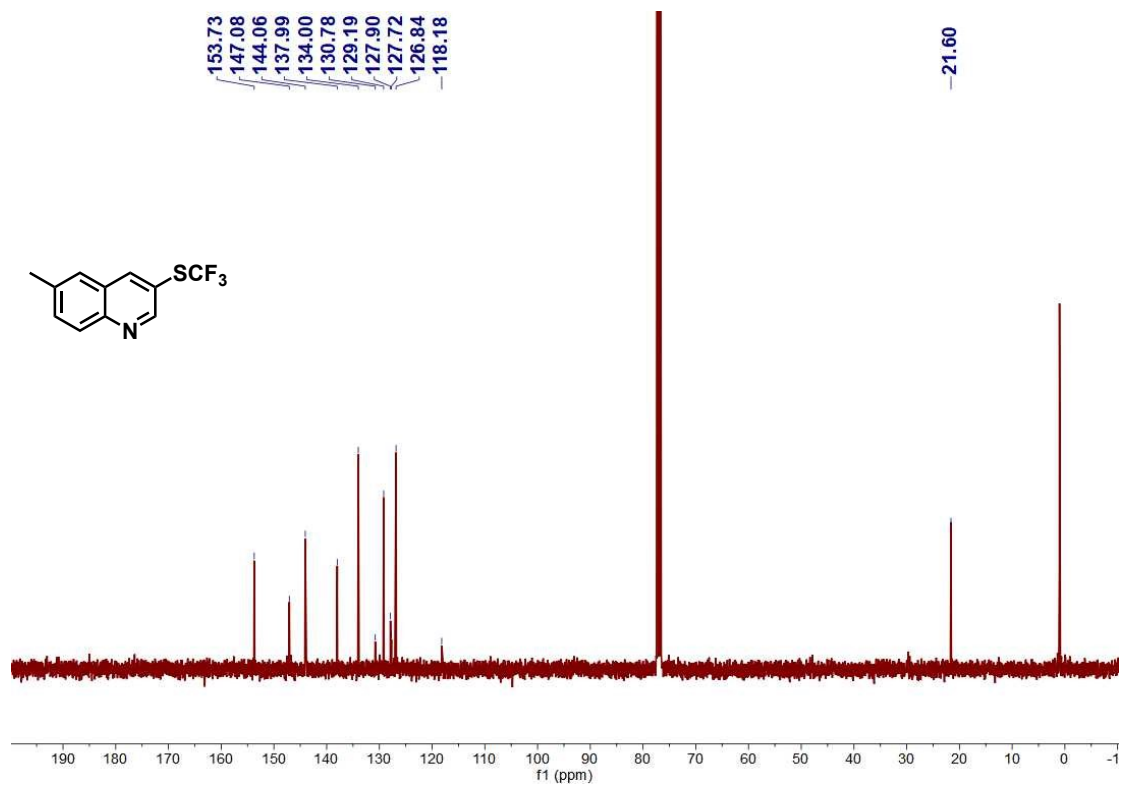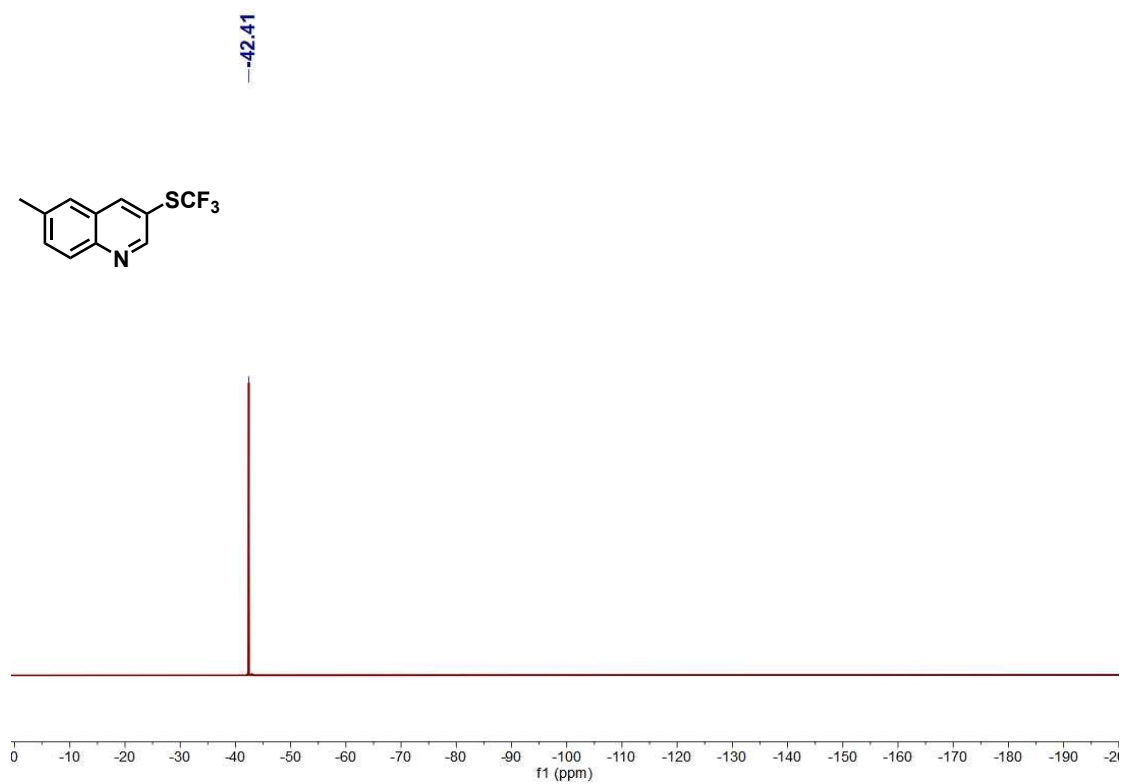

$^1\text{H}$  NMR,  $^{13}\text{C}$  NMR and  $^{19}\text{F}$  NMR of **3e**

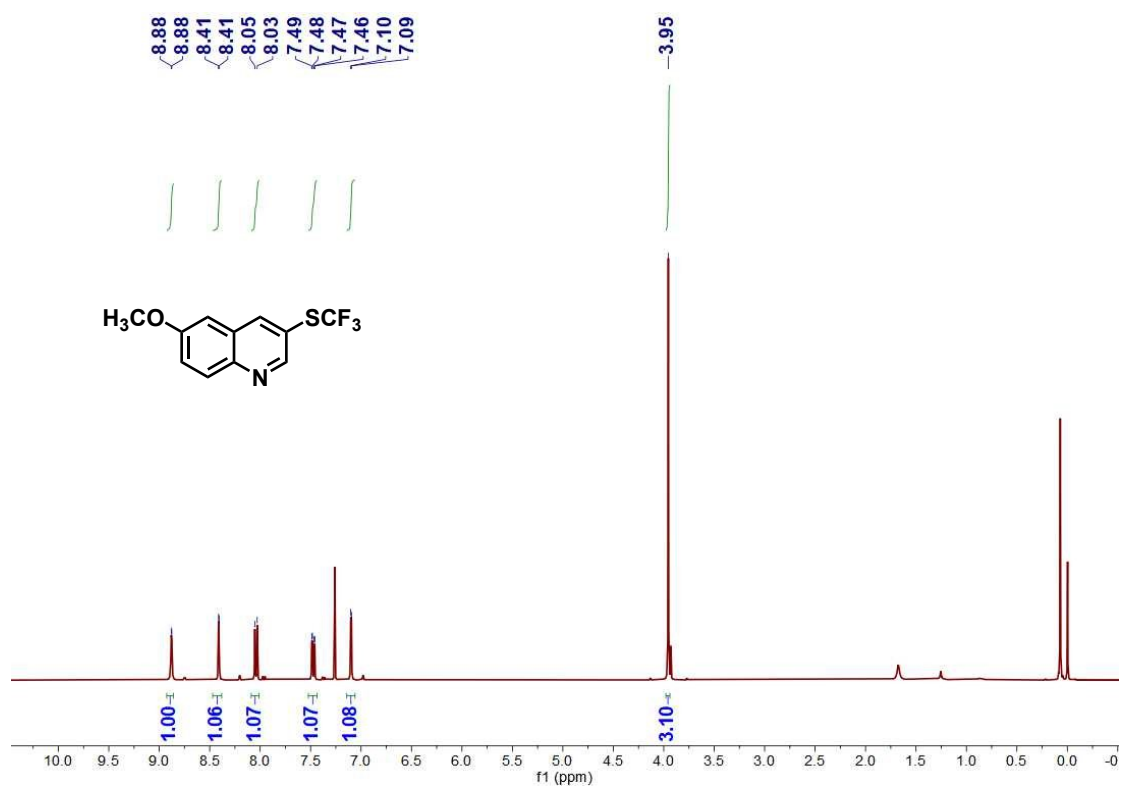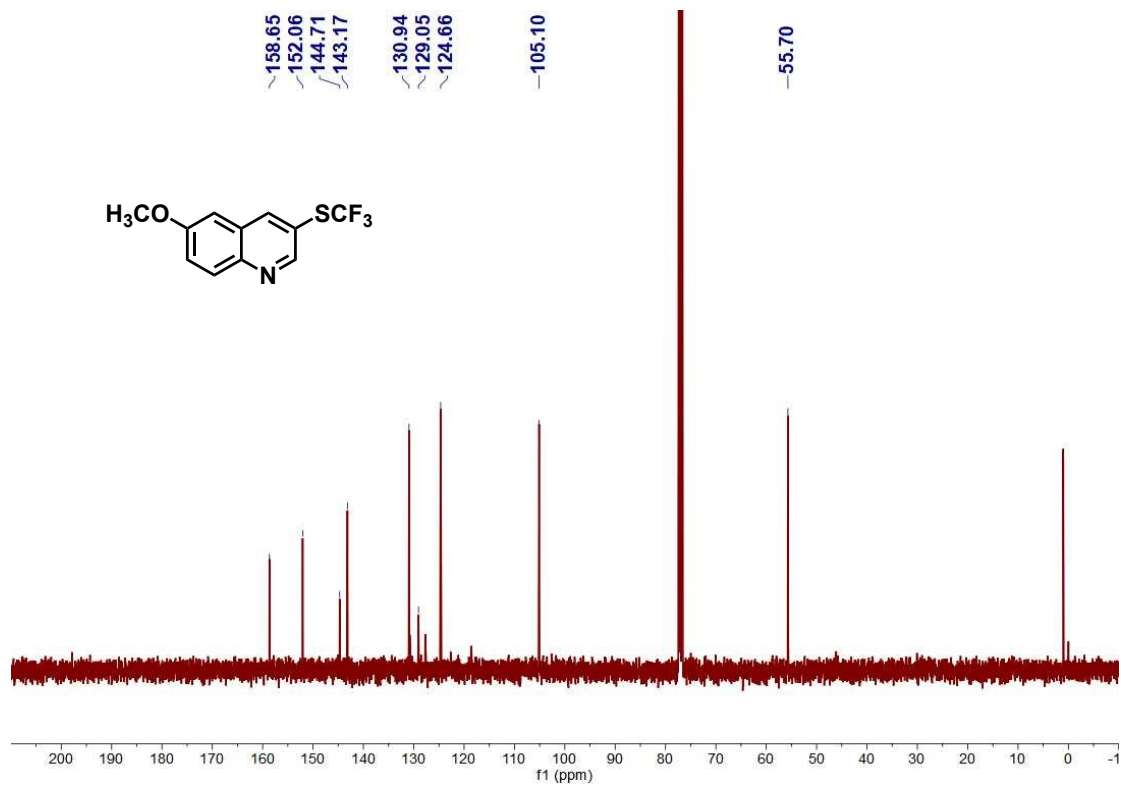

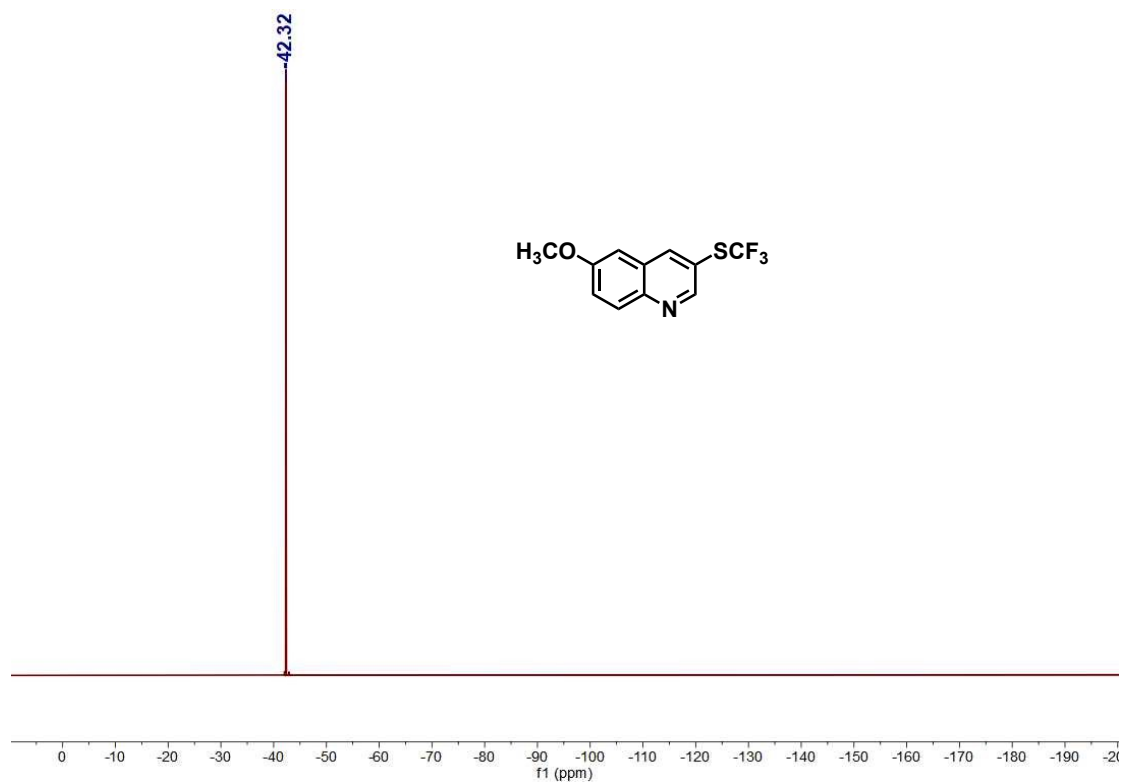

$^1\text{H}$  NMR,  $^{13}\text{C}$  NMR and  $^{19}\text{F}$  NMR of **3f**

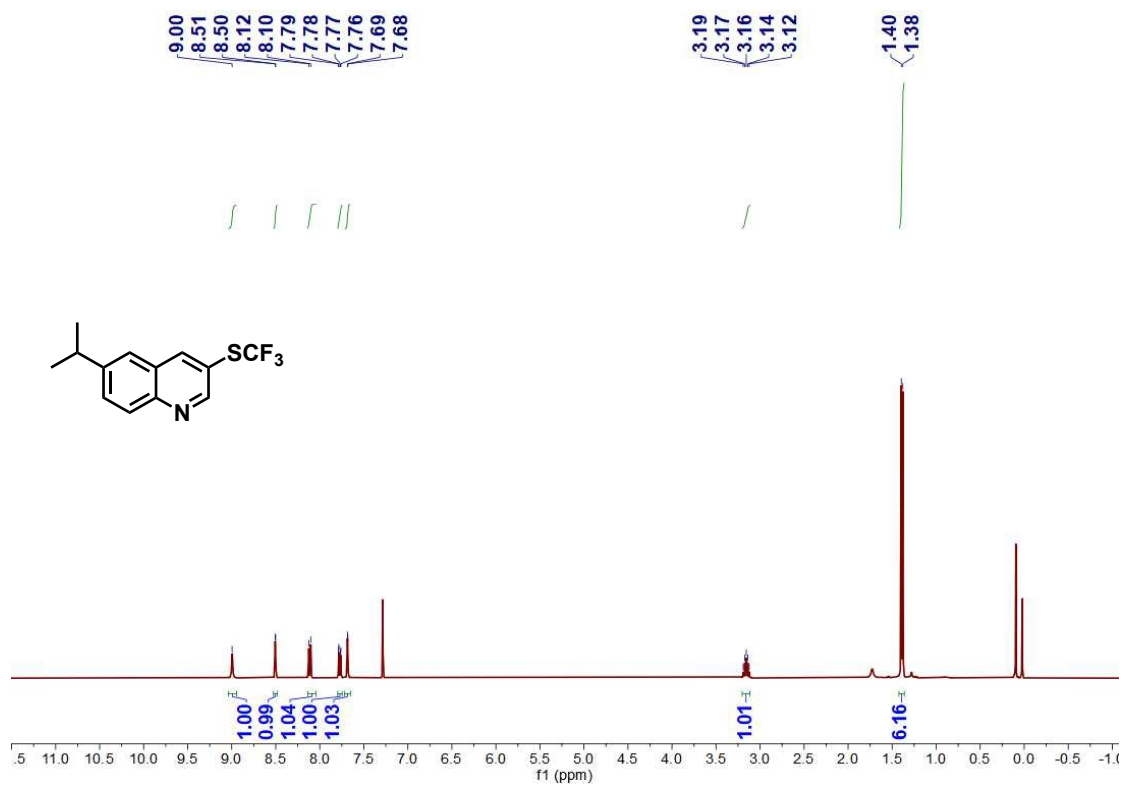

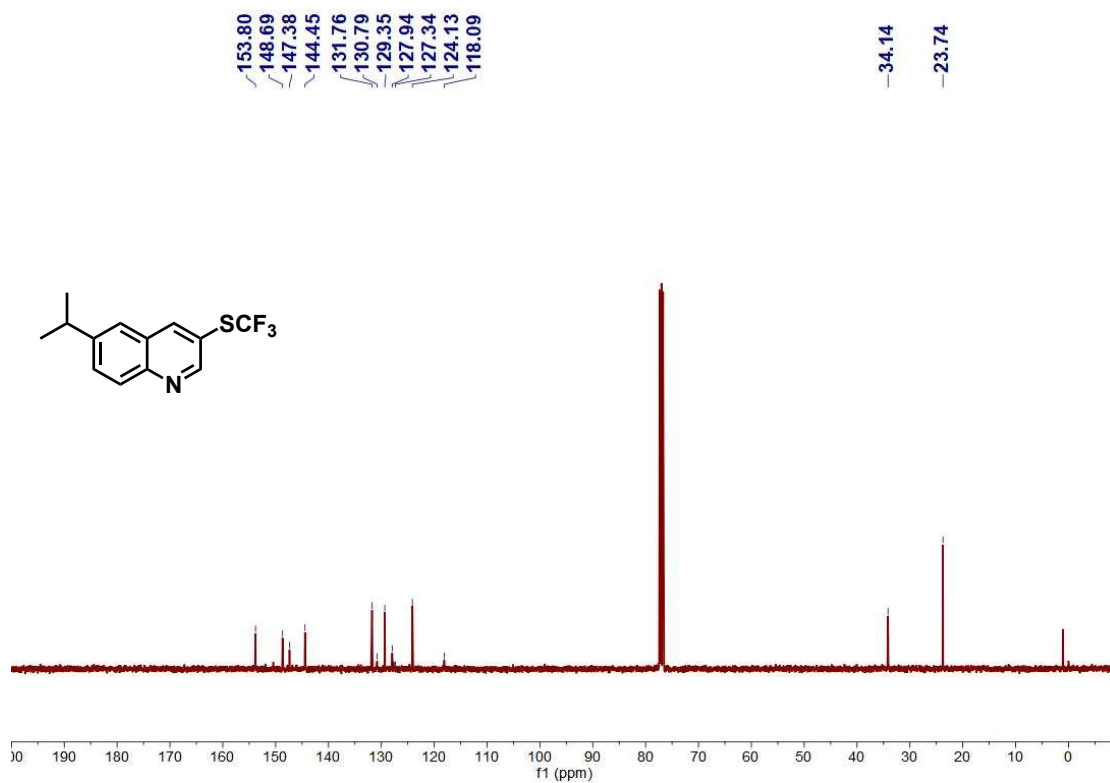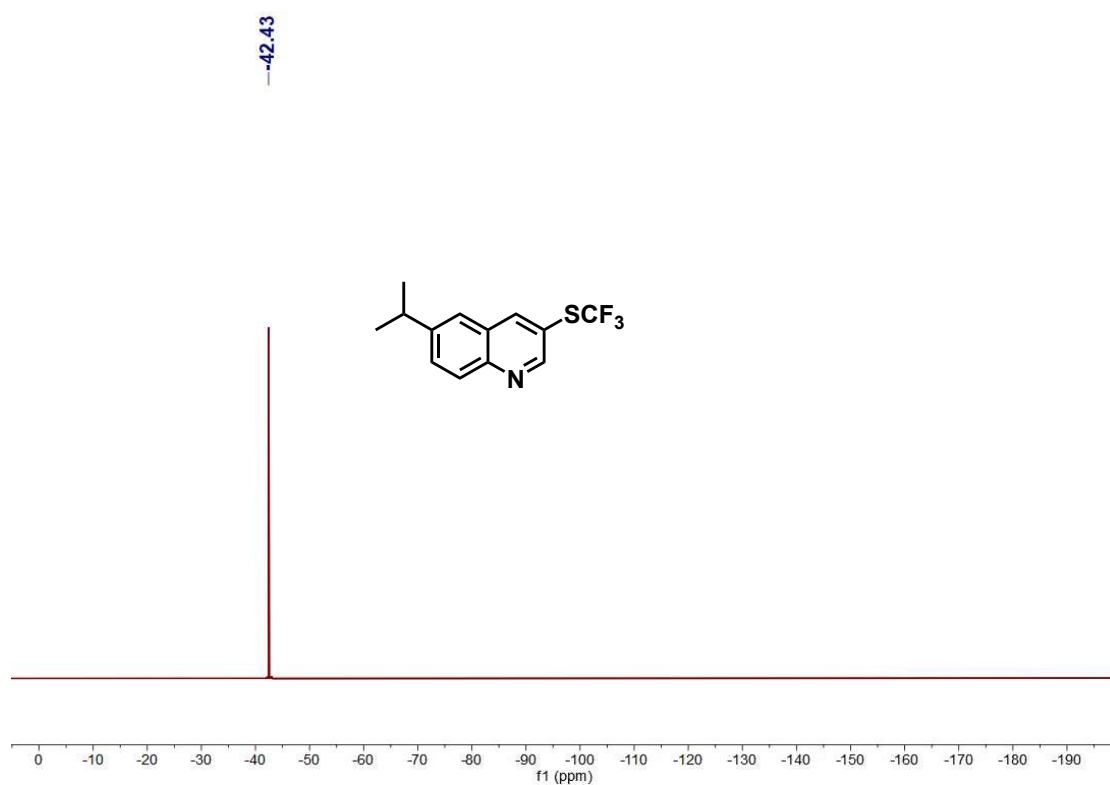

<sup>1</sup>H NMR, <sup>13</sup>C NMR and <sup>19</sup>F NMR of **3g**

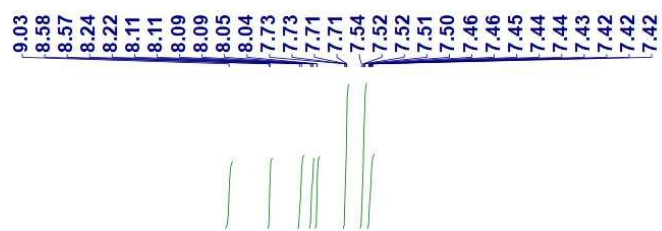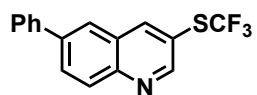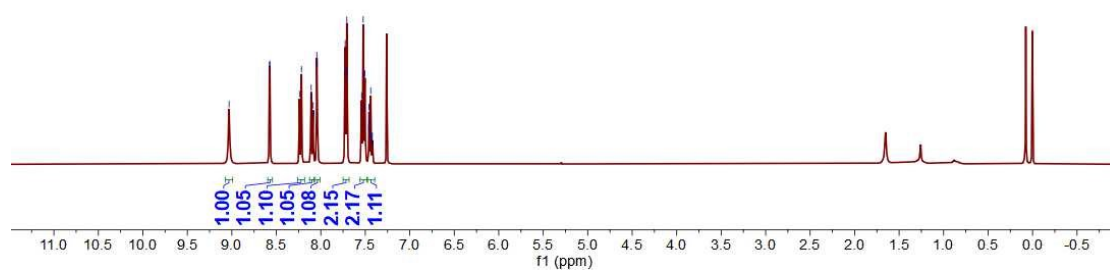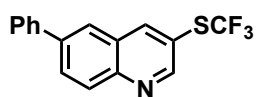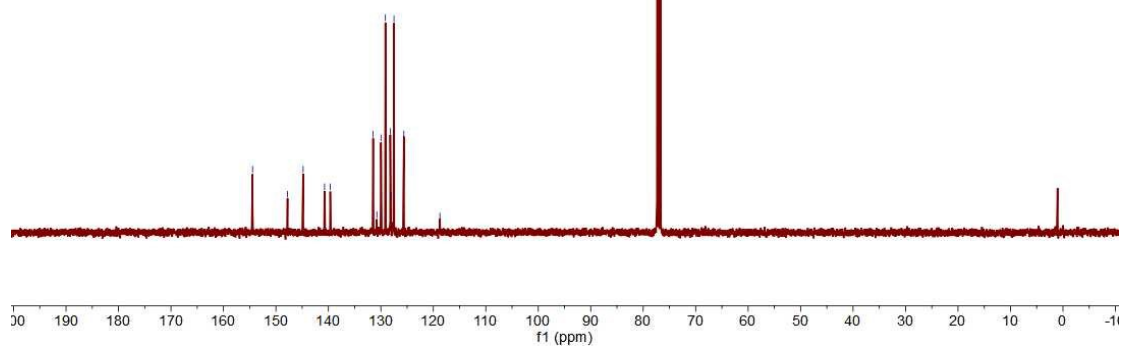



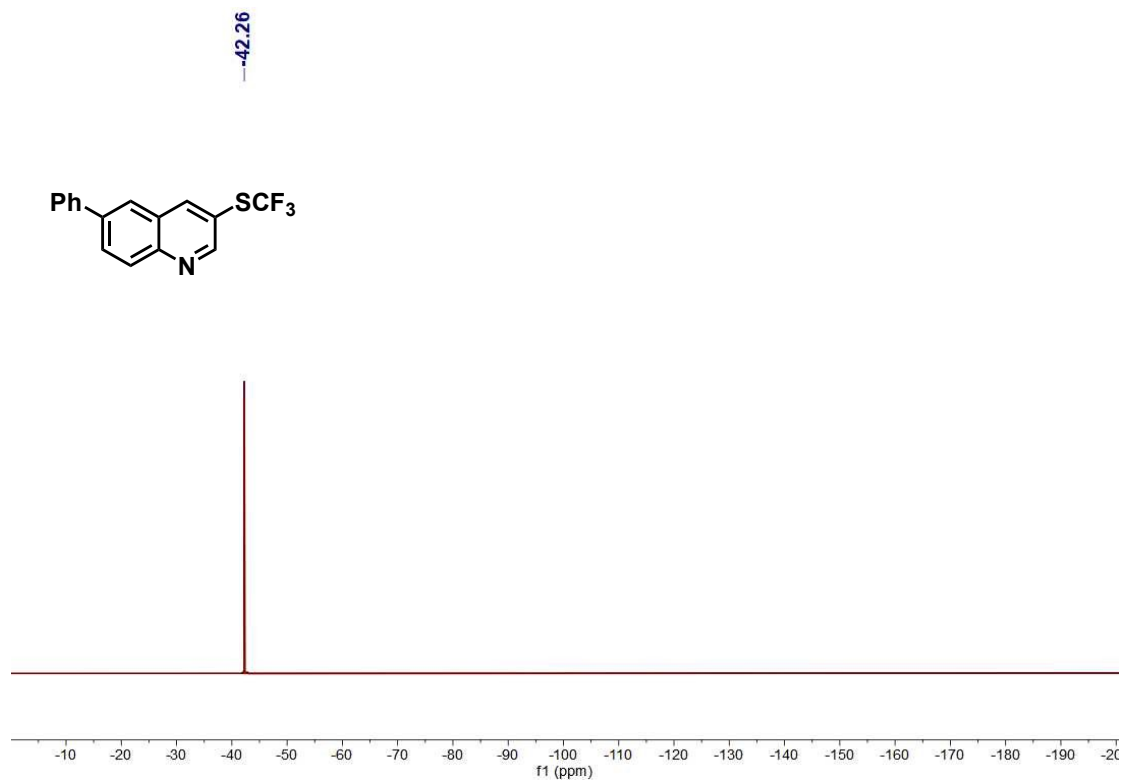

<sup>1</sup>H NMR, <sup>13</sup>C NMR and <sup>19</sup>F NMR of **3h**

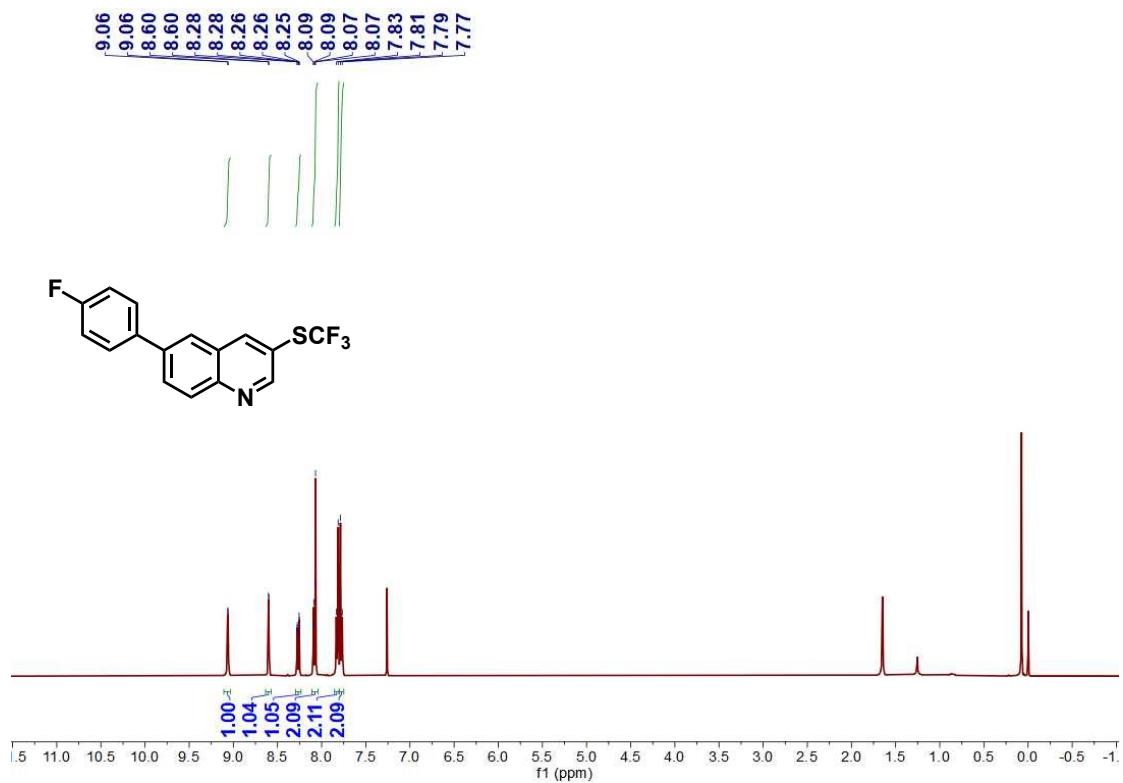

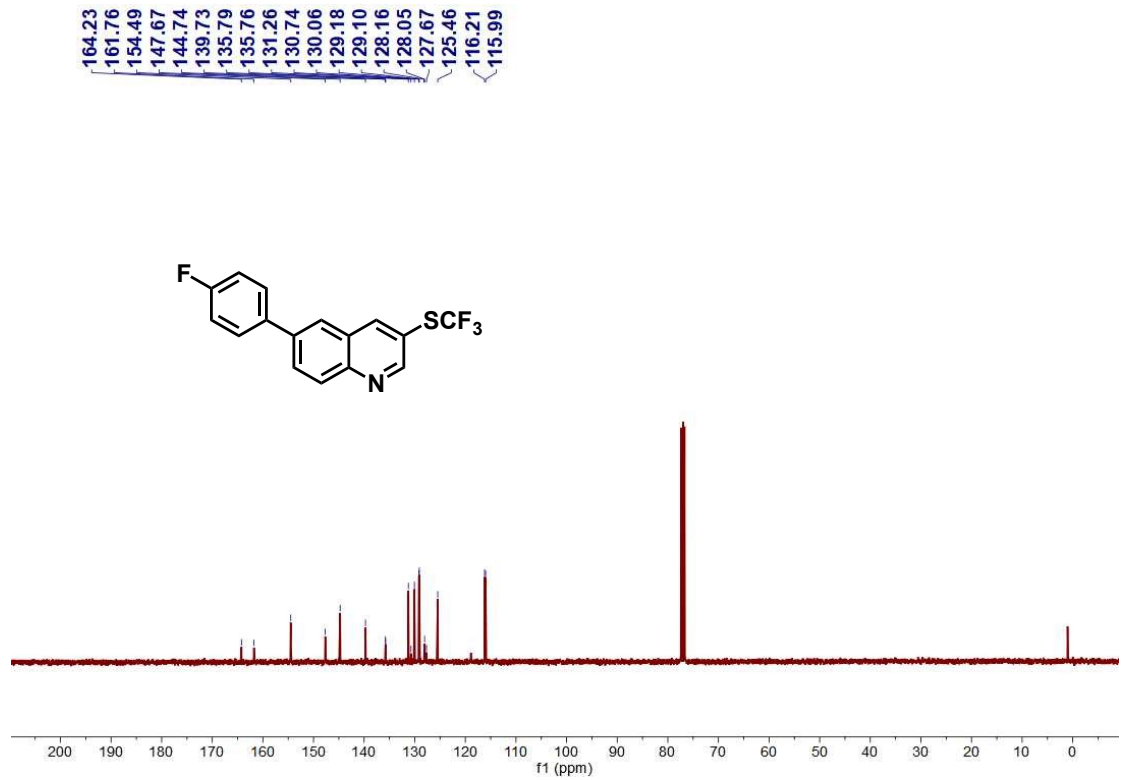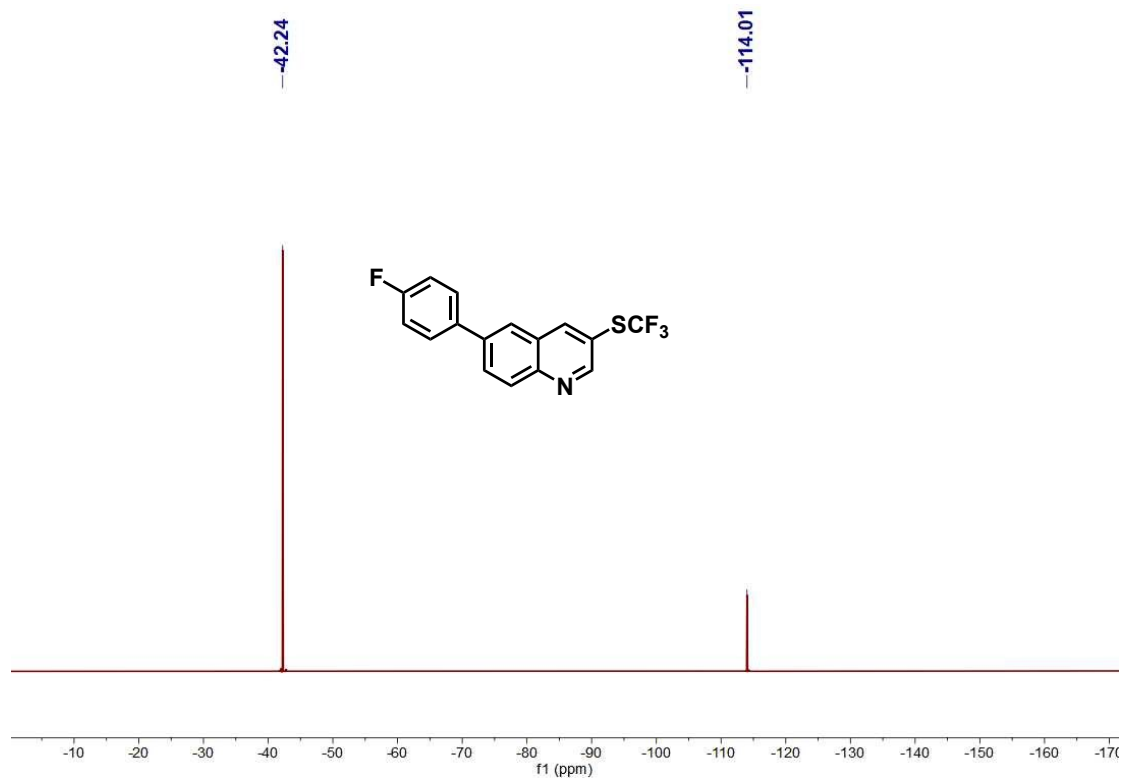

$^1\text{H}$  NMR,  $^{13}\text{C}$  NMR and  $^{19}\text{F}$  NMR of **3i**

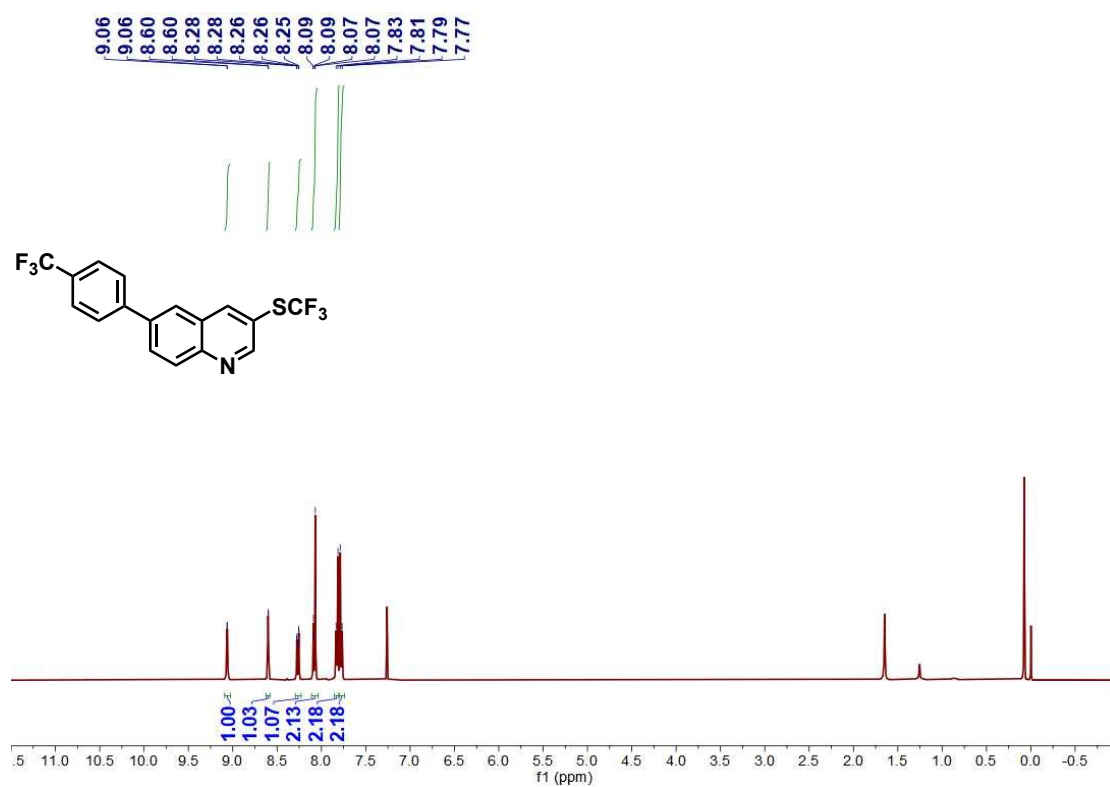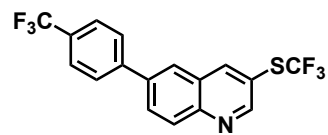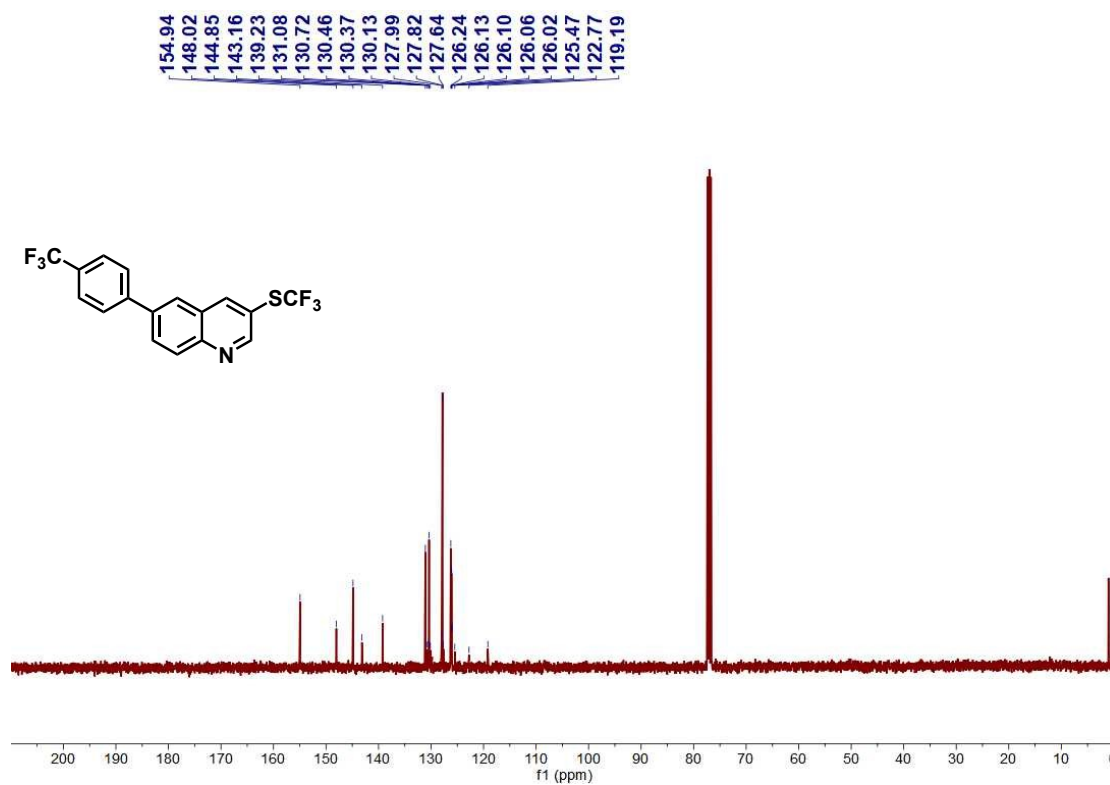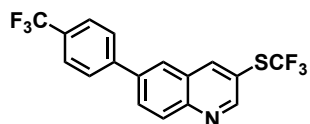

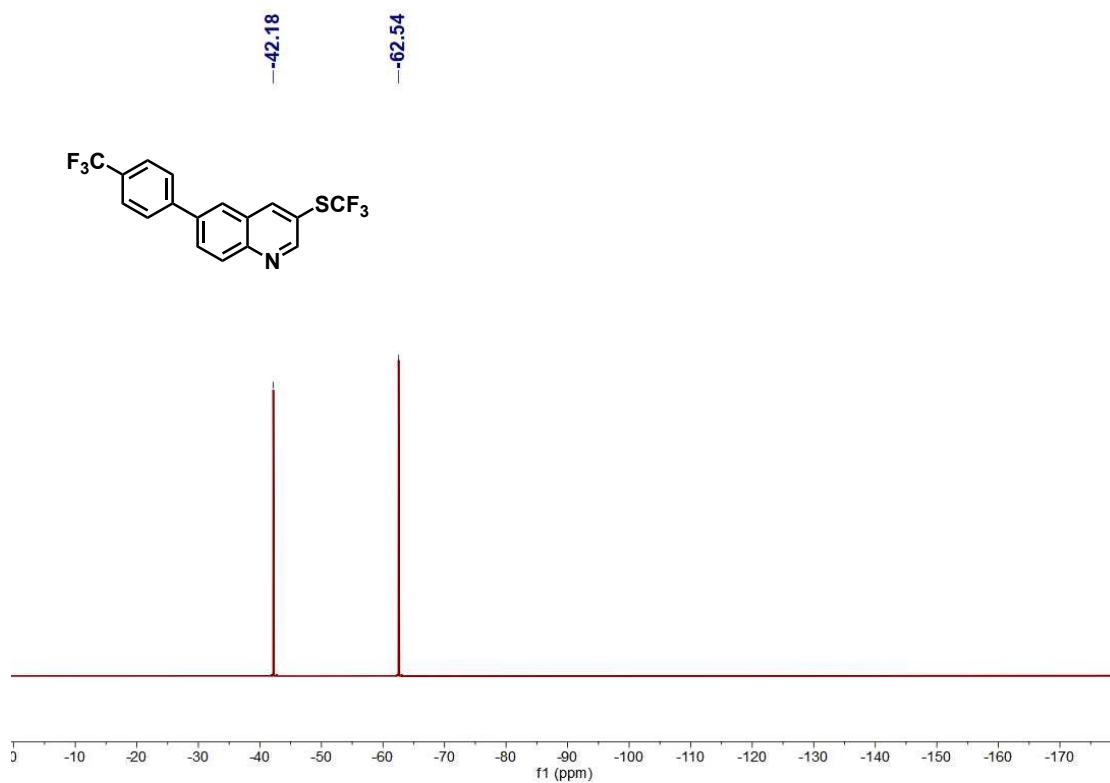

$^1\text{H}$  NMR,  $^{13}\text{C}$  NMR and  $^{19}\text{F}$  NMR of **3j**

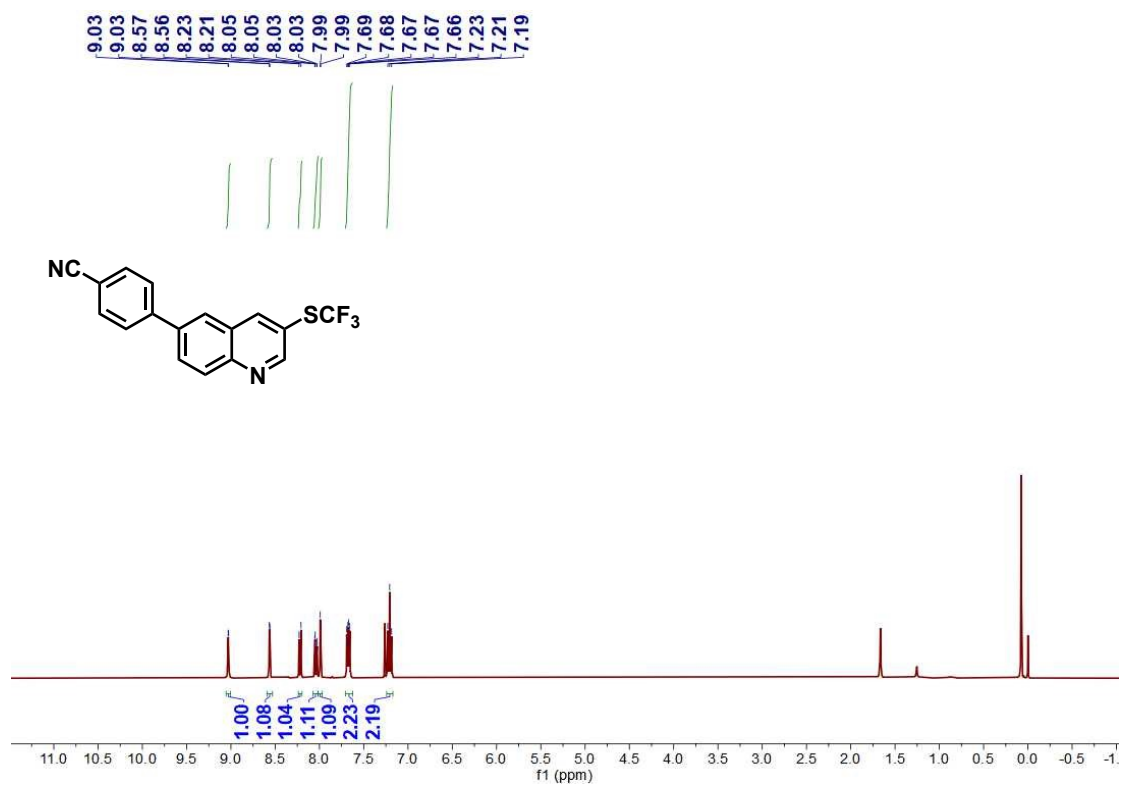

164.23  
161.76  
154.50  
147.68  
144.72  
139.72  
135.79  
135.76  
131.25  
130.75  
130.08  
129.18  
129.10  
128.05  
125.45  
116.21  
115.99

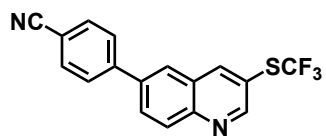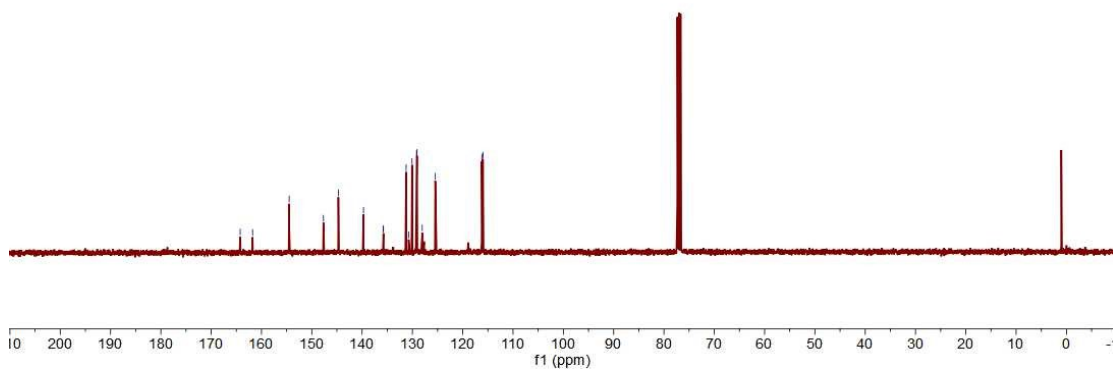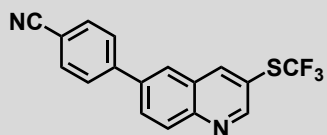

$^1\text{H}$  NMR,  $^{13}\text{C}$  NMR and  $^{19}\text{F}$  NMR of **3k**

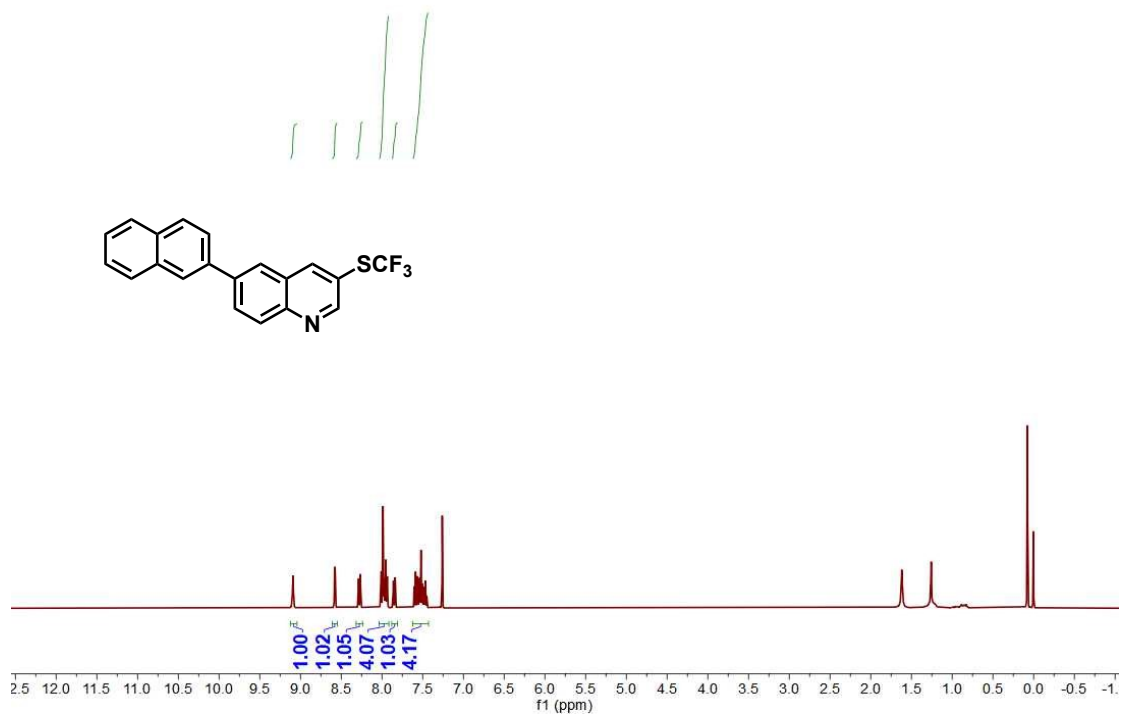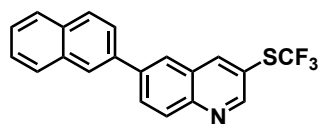

154.66  
147.75  
144.72  
140.65  
138.58  
134.32  
133.85  
133.60  
131.42  
129.30  
128.64  
128.52  
127.86  
127.71  
127.44  
126.57  
126.12  
125.50  
125.42

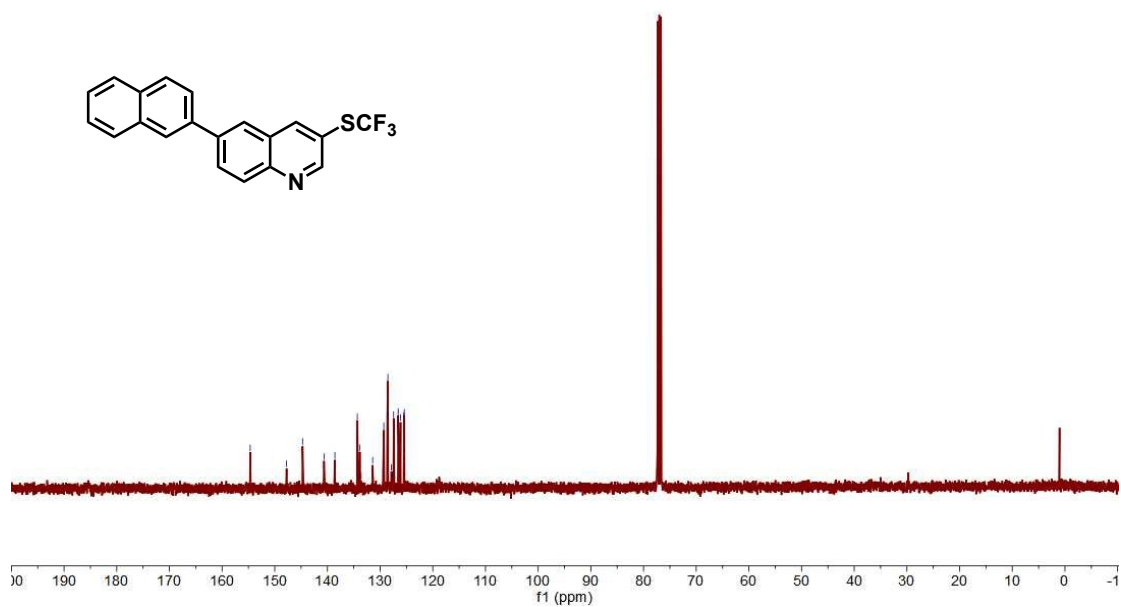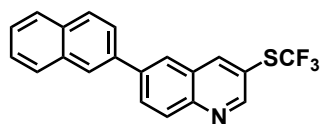

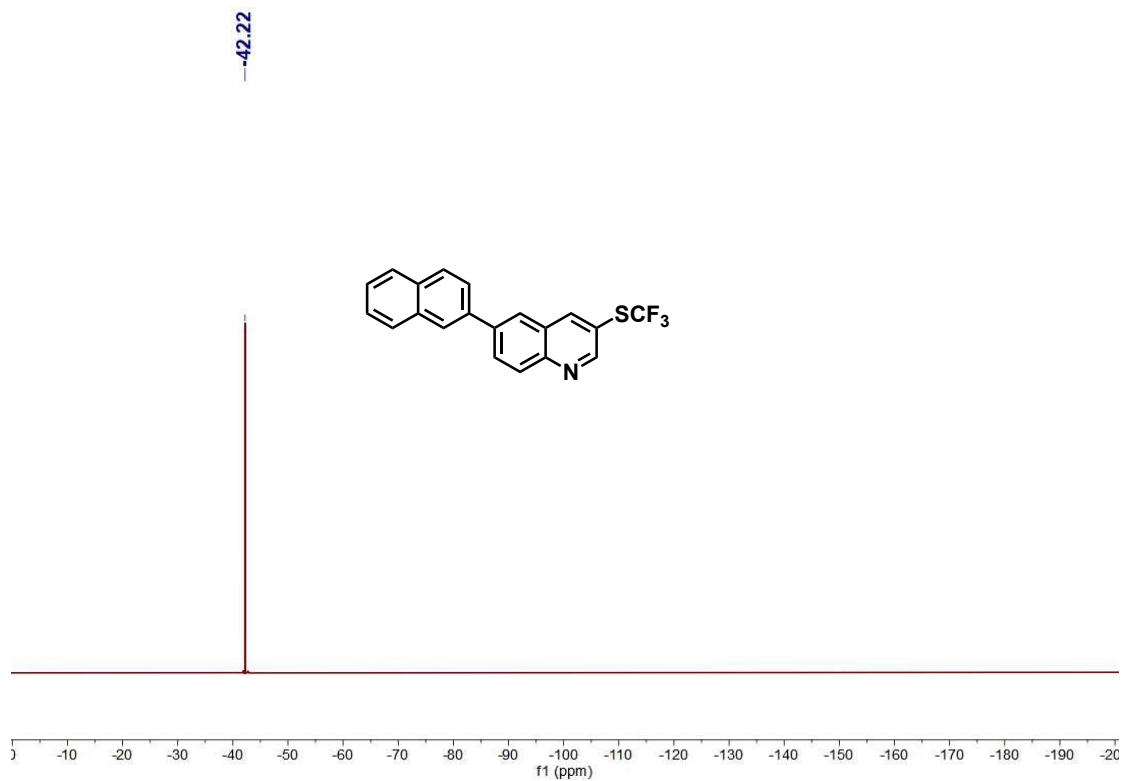

<sup>1</sup>H NMR, <sup>13</sup>C NMR and <sup>19</sup>F NMR of **3I**

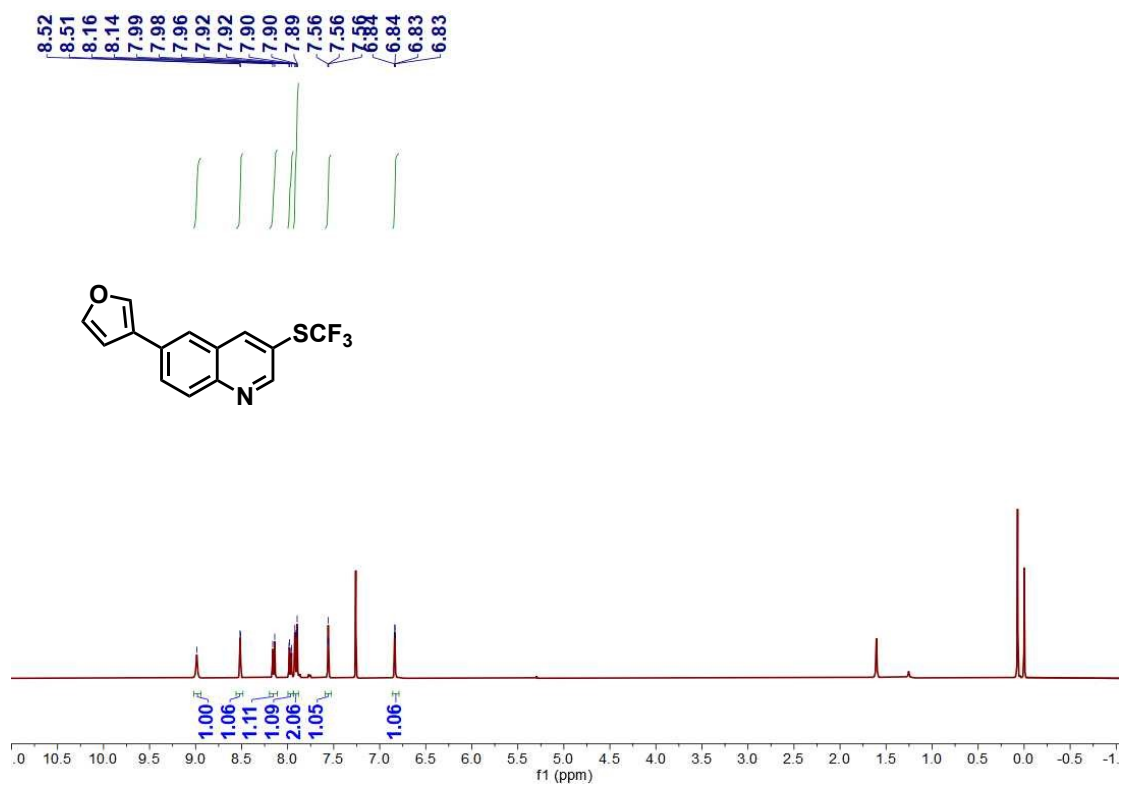

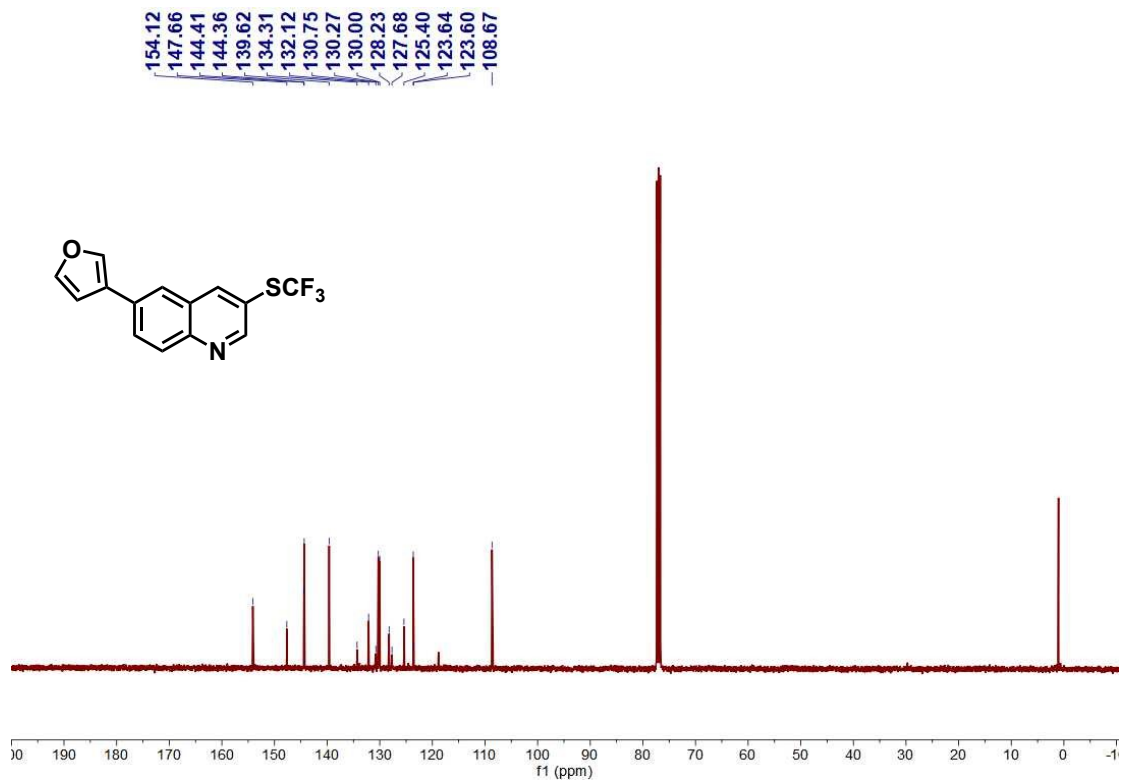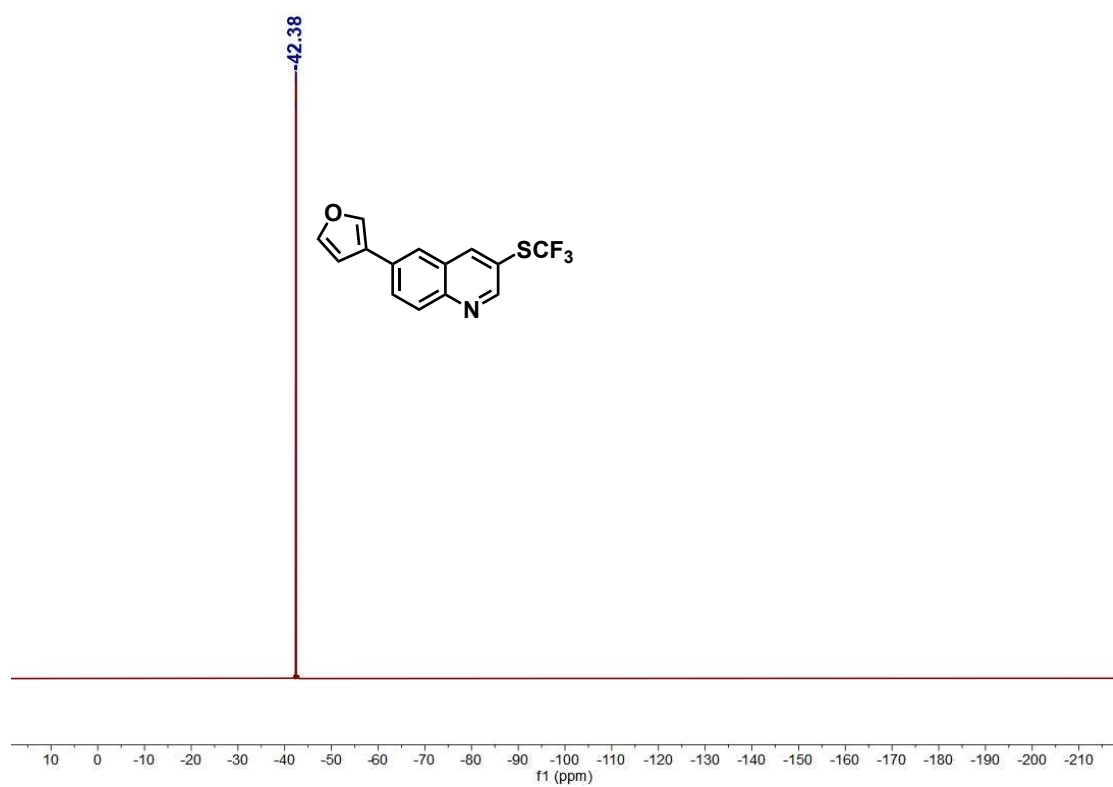



<sup>1</sup>H NMR, <sup>13</sup>C NMR and <sup>19</sup>F NMR of **3m**

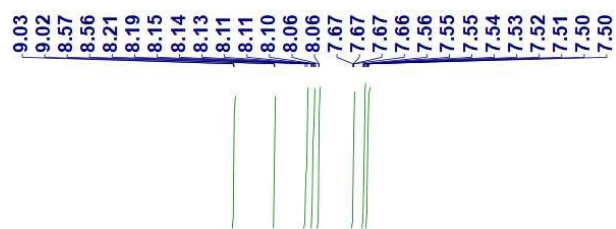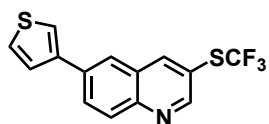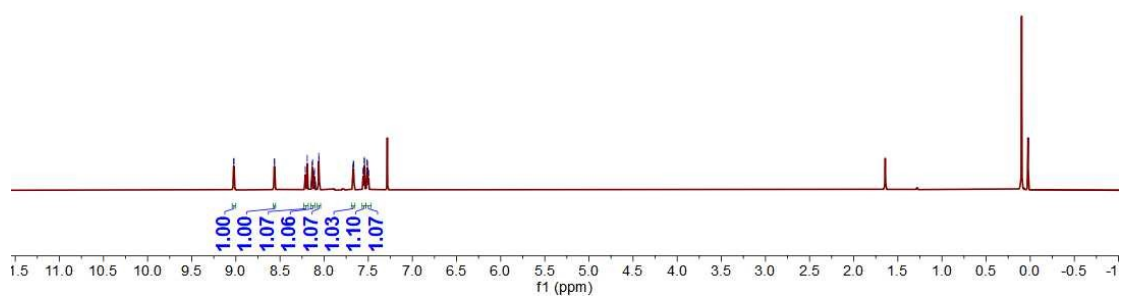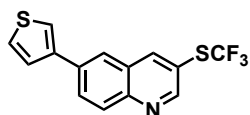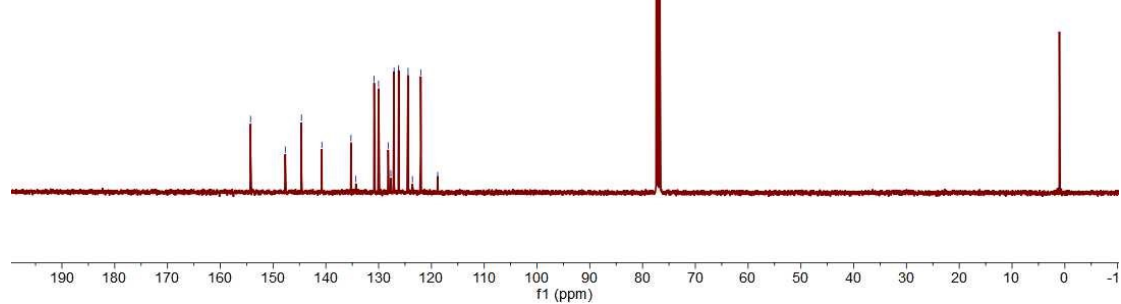

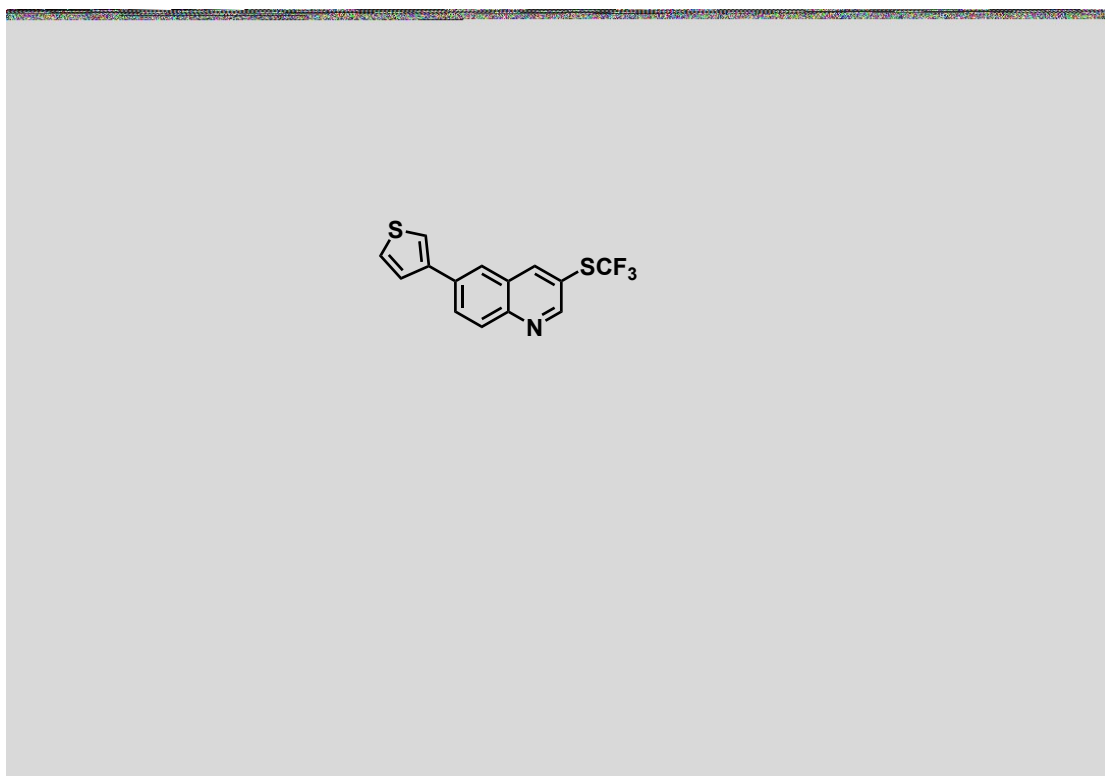

$^1\text{H}$  NMR,  $^{13}\text{C}$  NMR and  $^{19}\text{F}$  NMR of **3n**

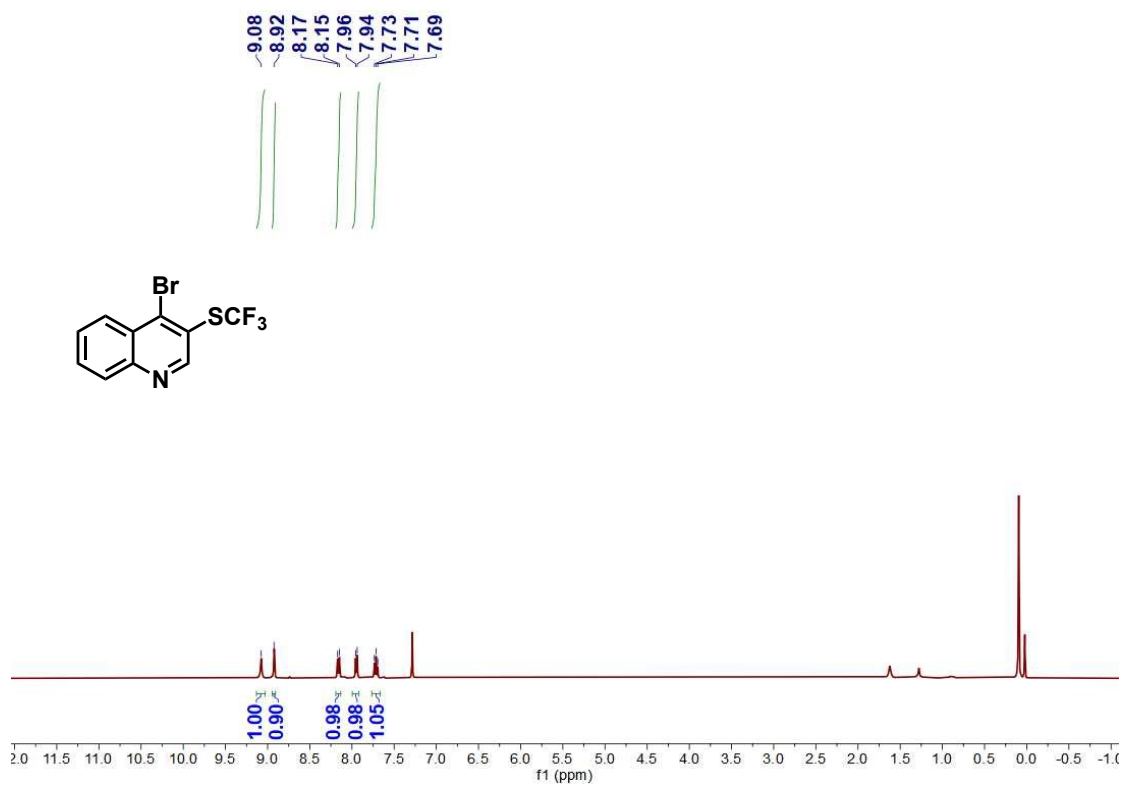

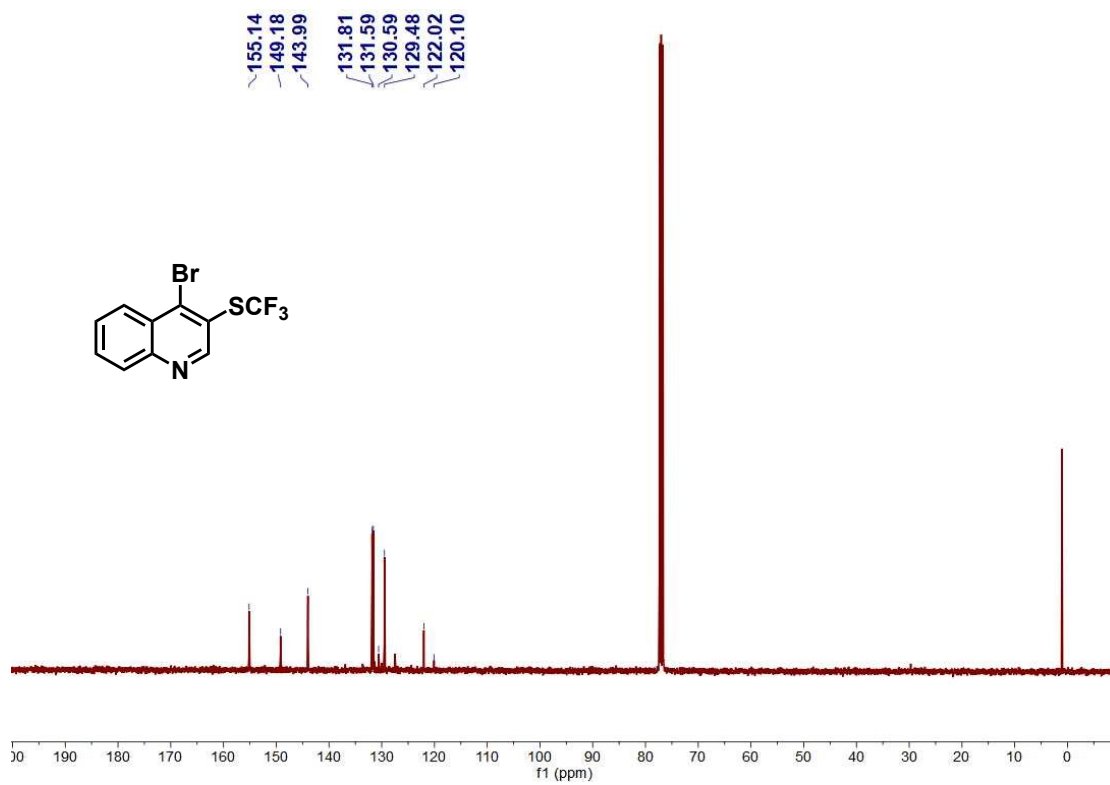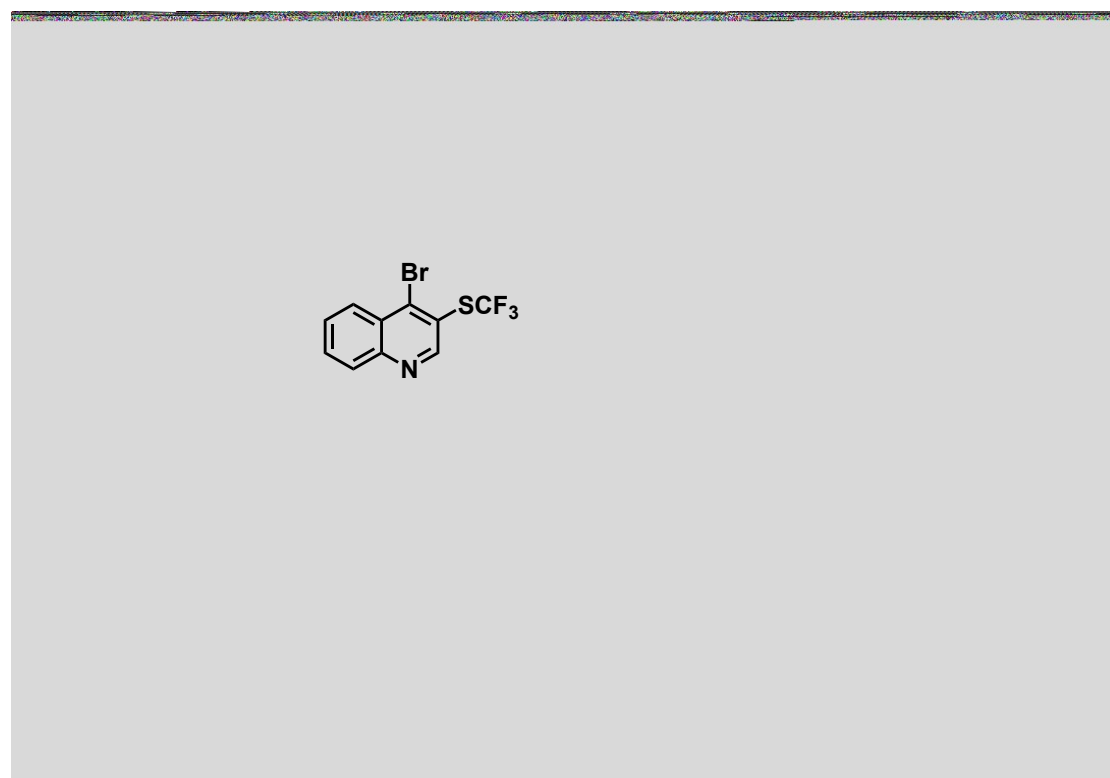

<sup>1</sup>H NMR, <sup>13</sup>C NMR and <sup>19</sup>F NMR of **3o**

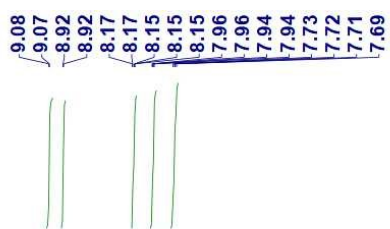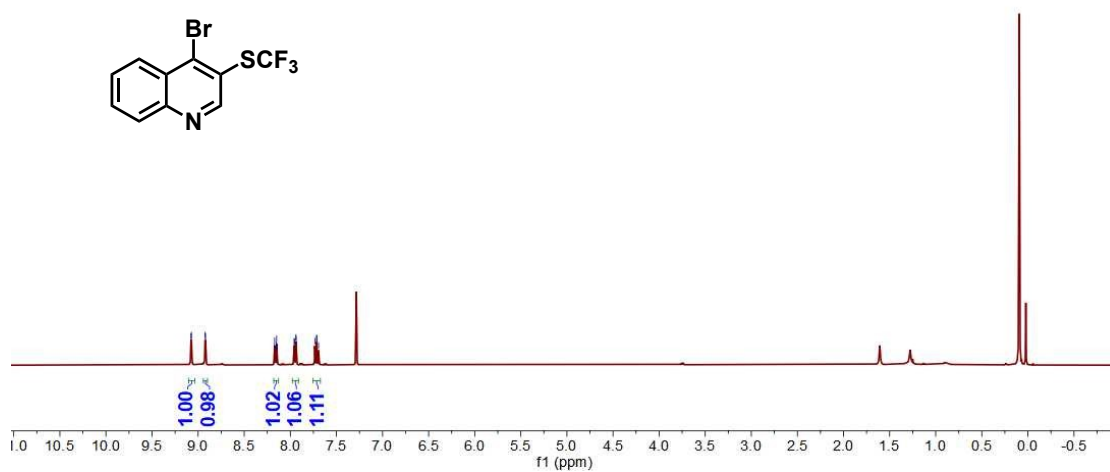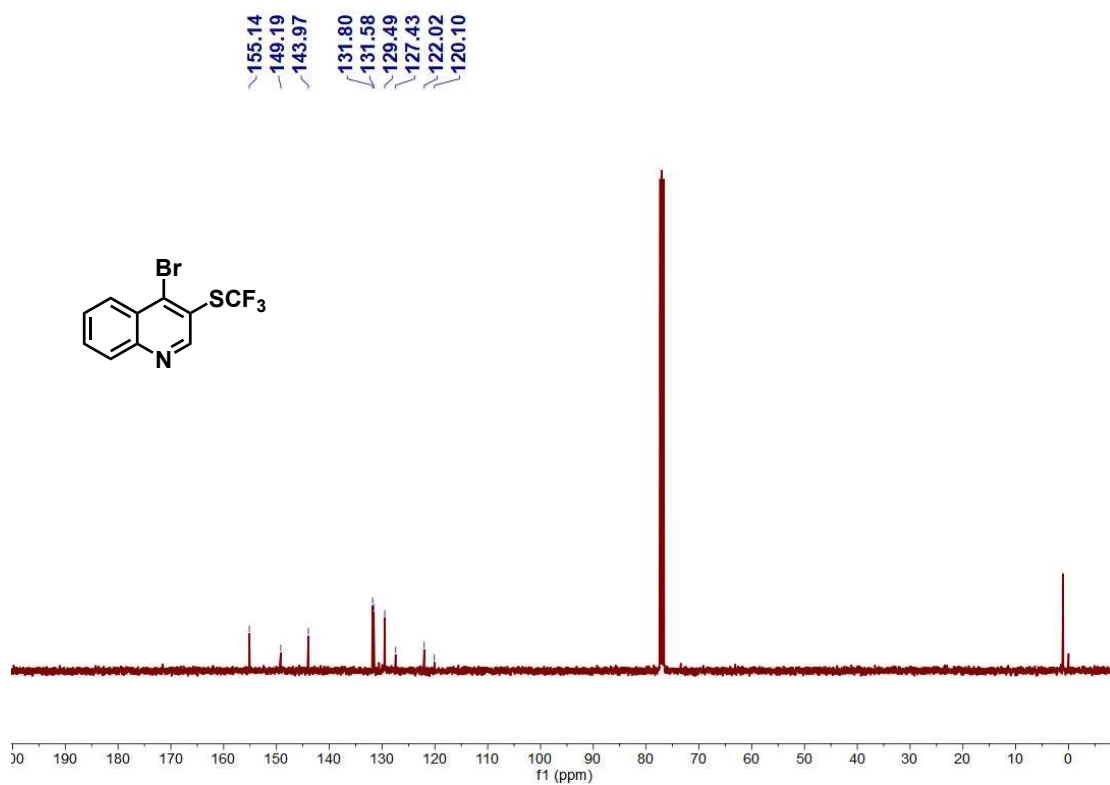

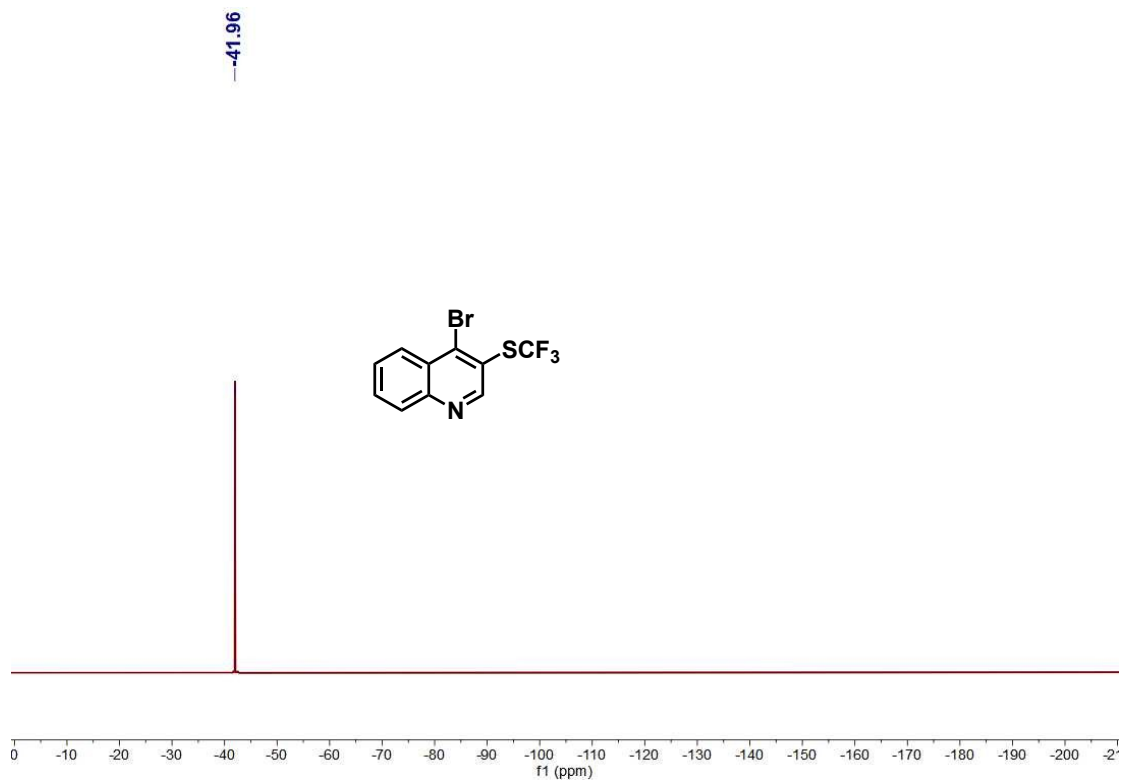

<sup>1</sup>H NMR, <sup>13</sup>C NMR and <sup>19</sup>F NMR of **3p**

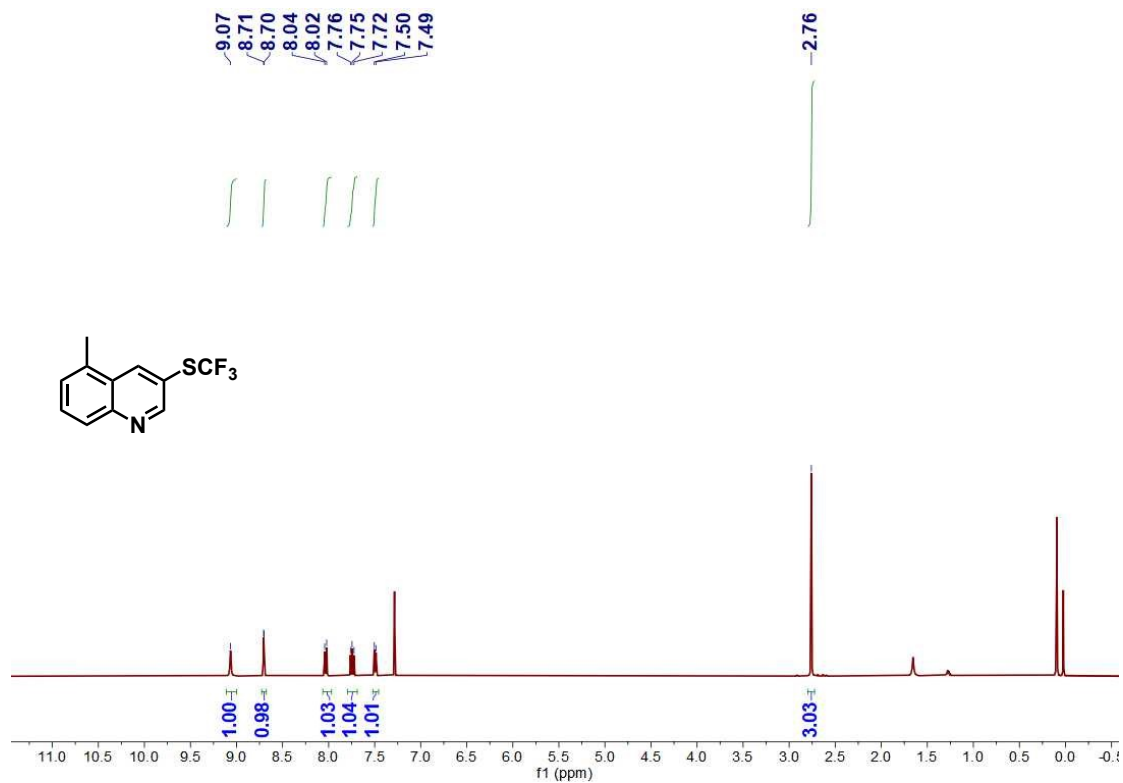

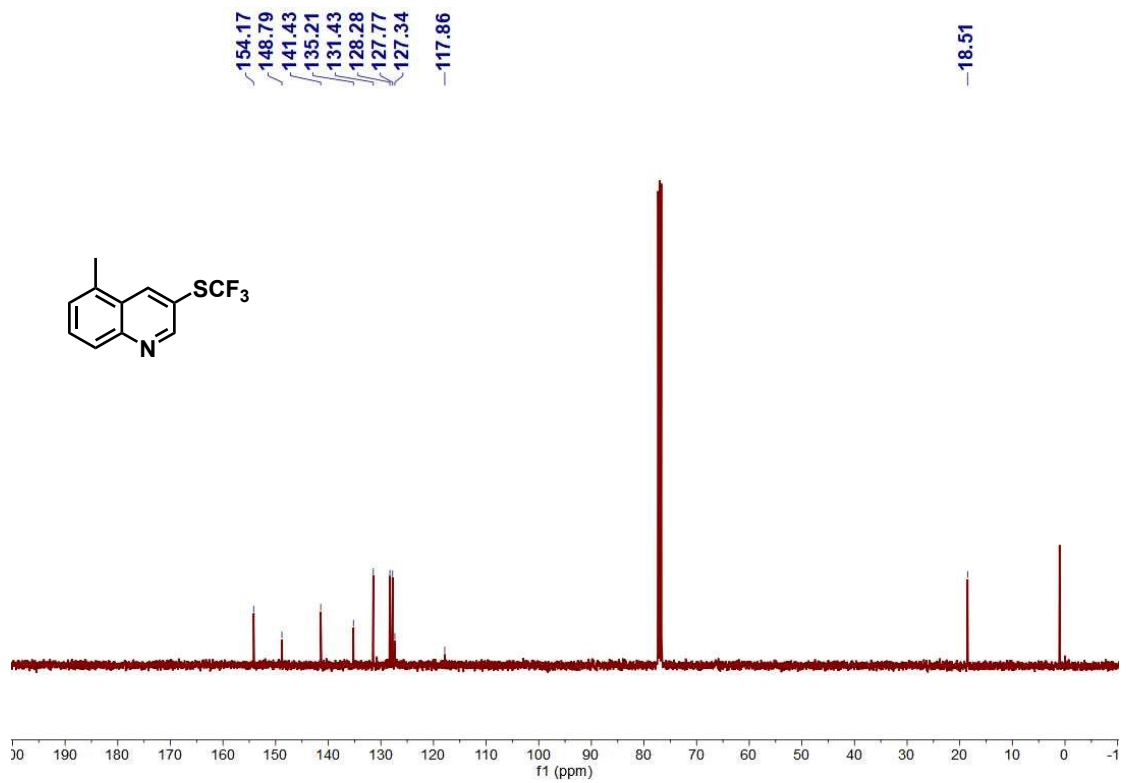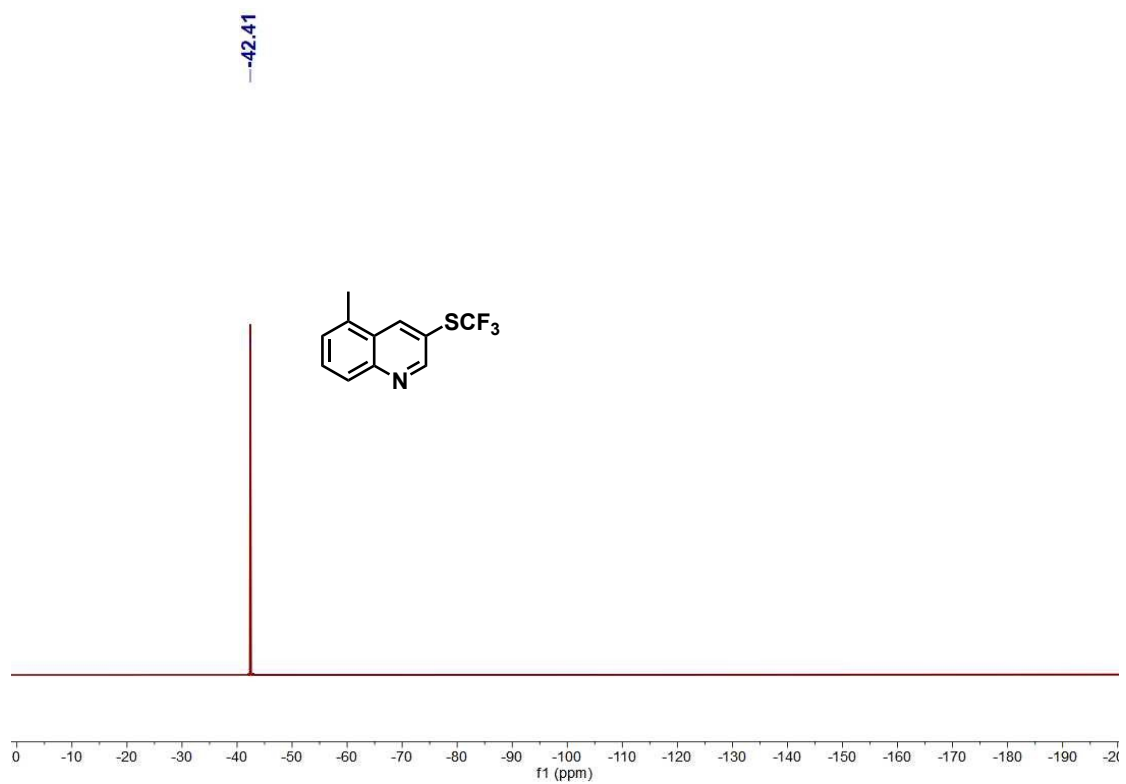

<sup>1</sup>H NMR, <sup>13</sup>C NMR and <sup>19</sup>F NMR of **3q**

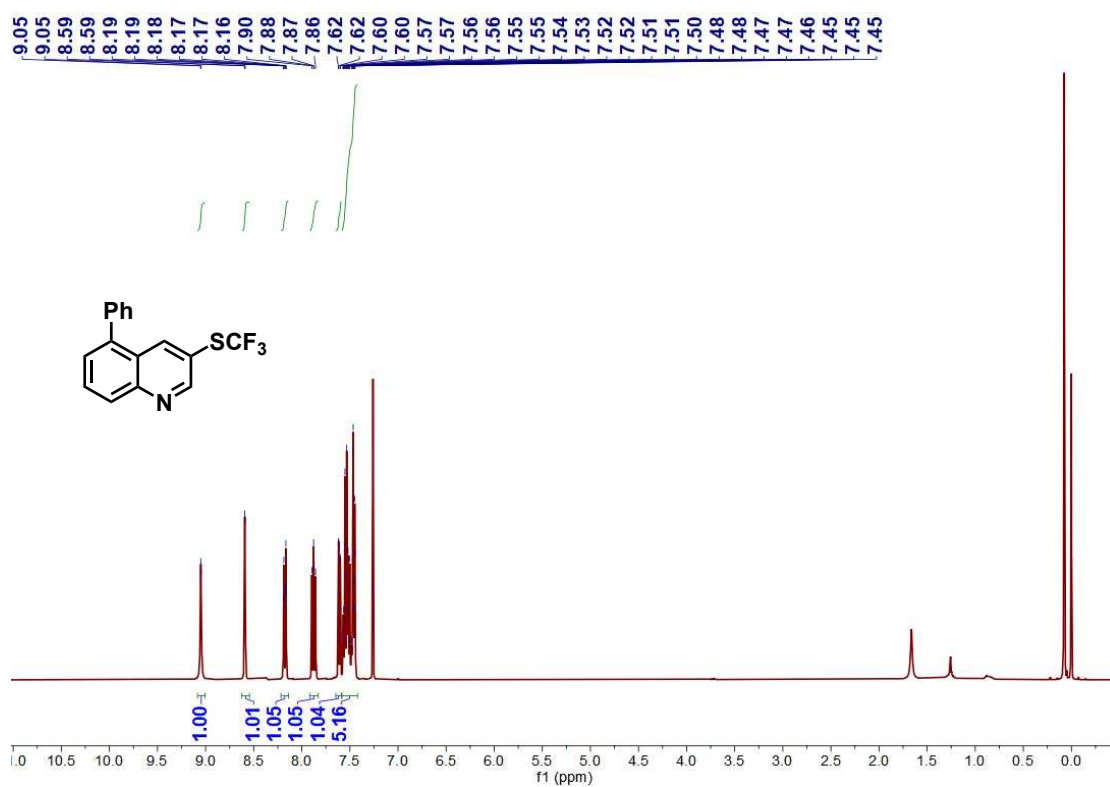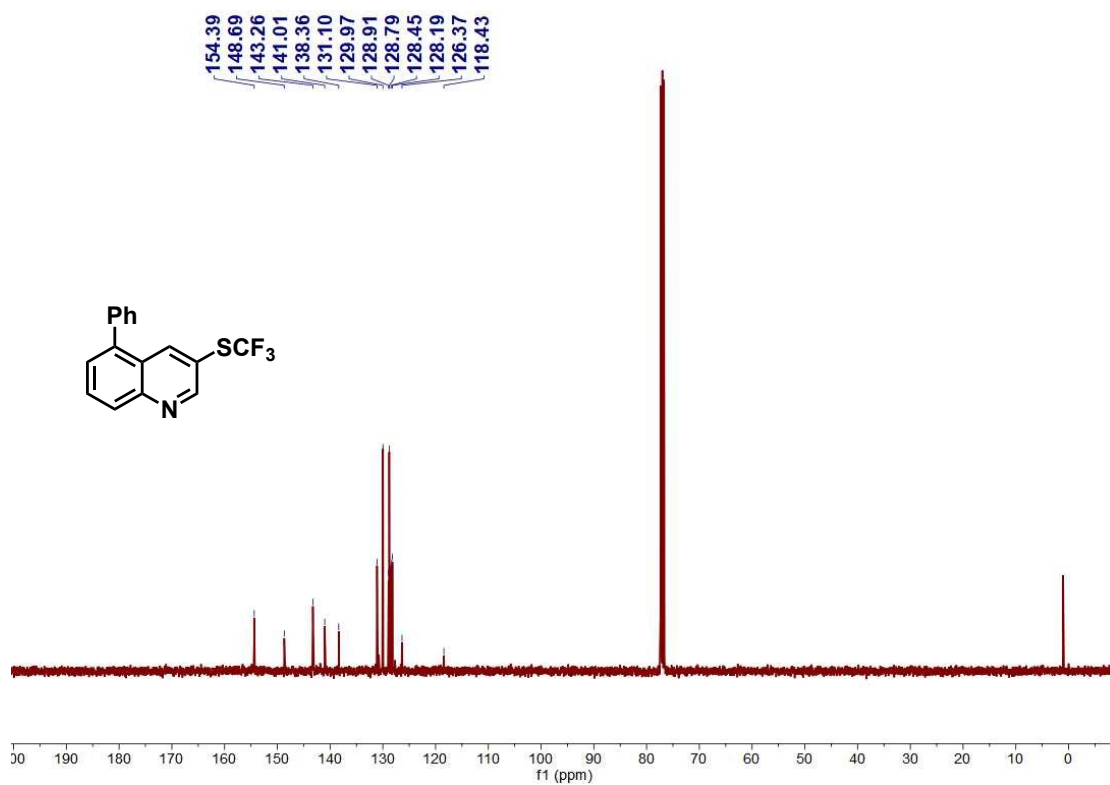

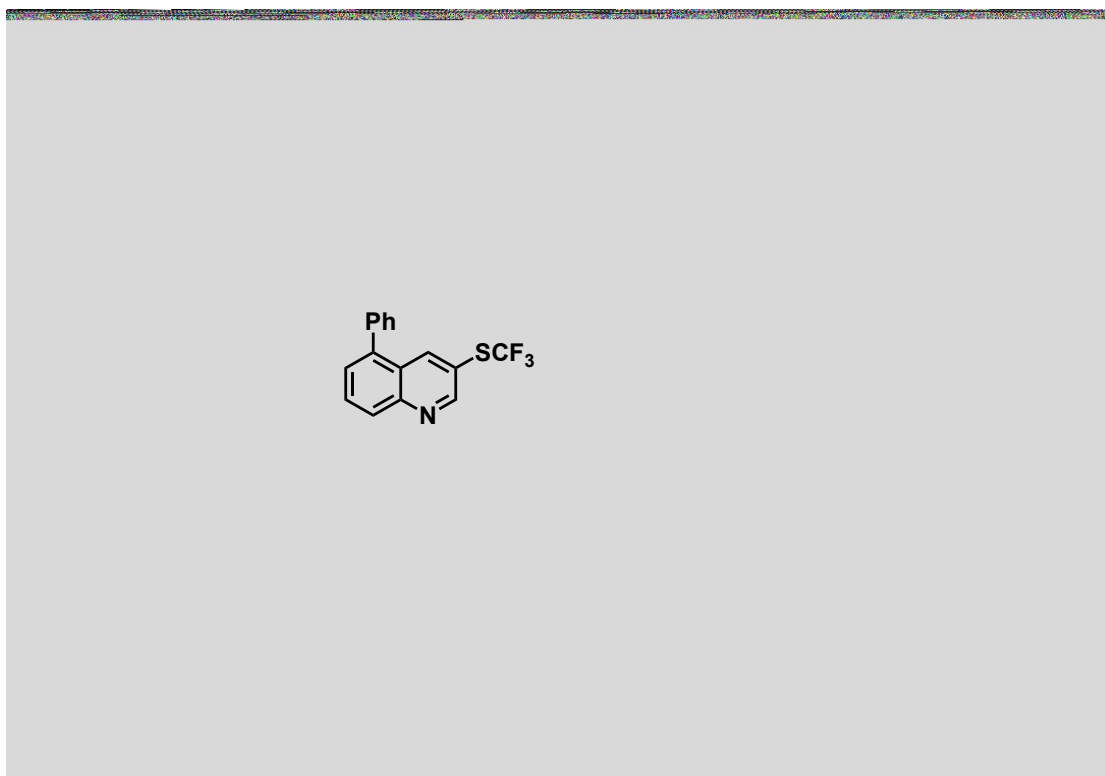

$^1\text{H}$  NMR,  $^{13}\text{C}$  NMR and  $^{19}\text{F}$  NMR of **3r**

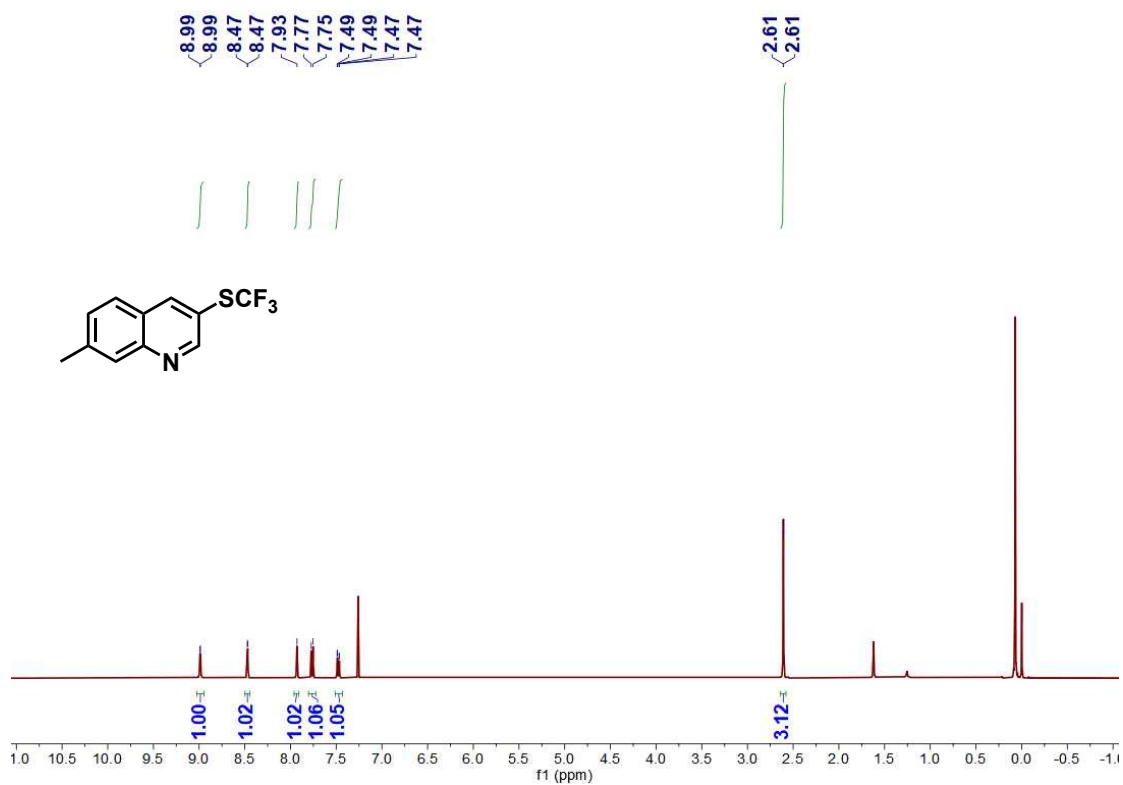



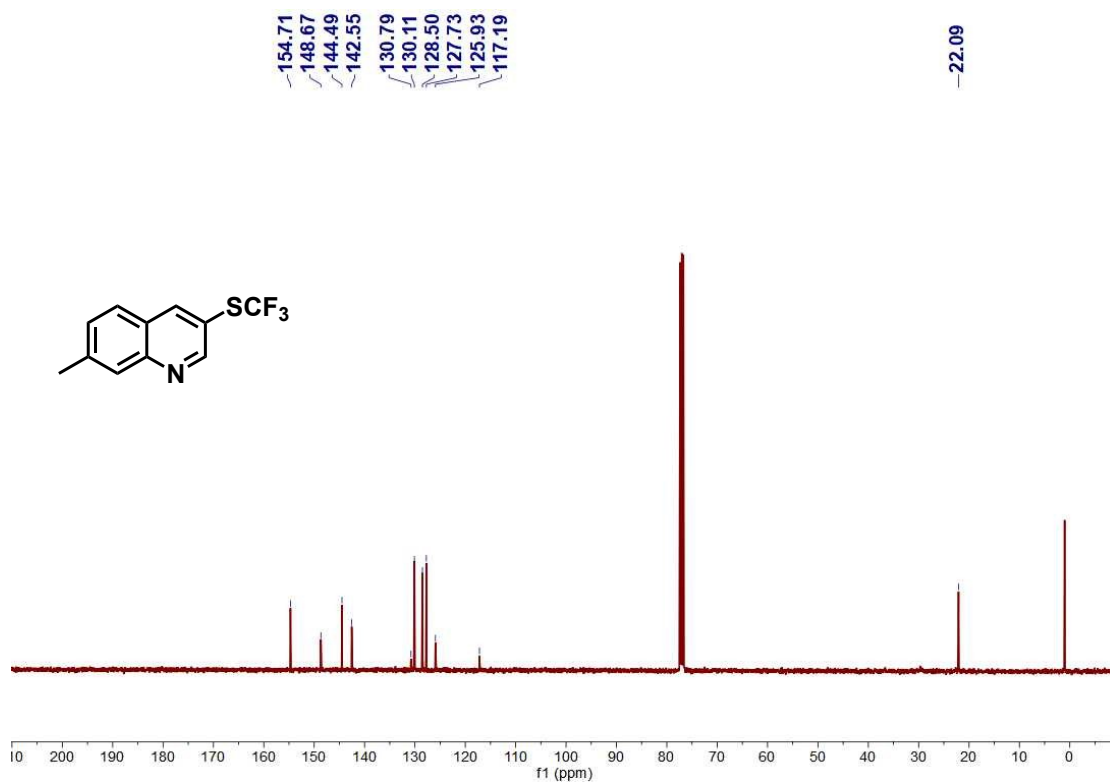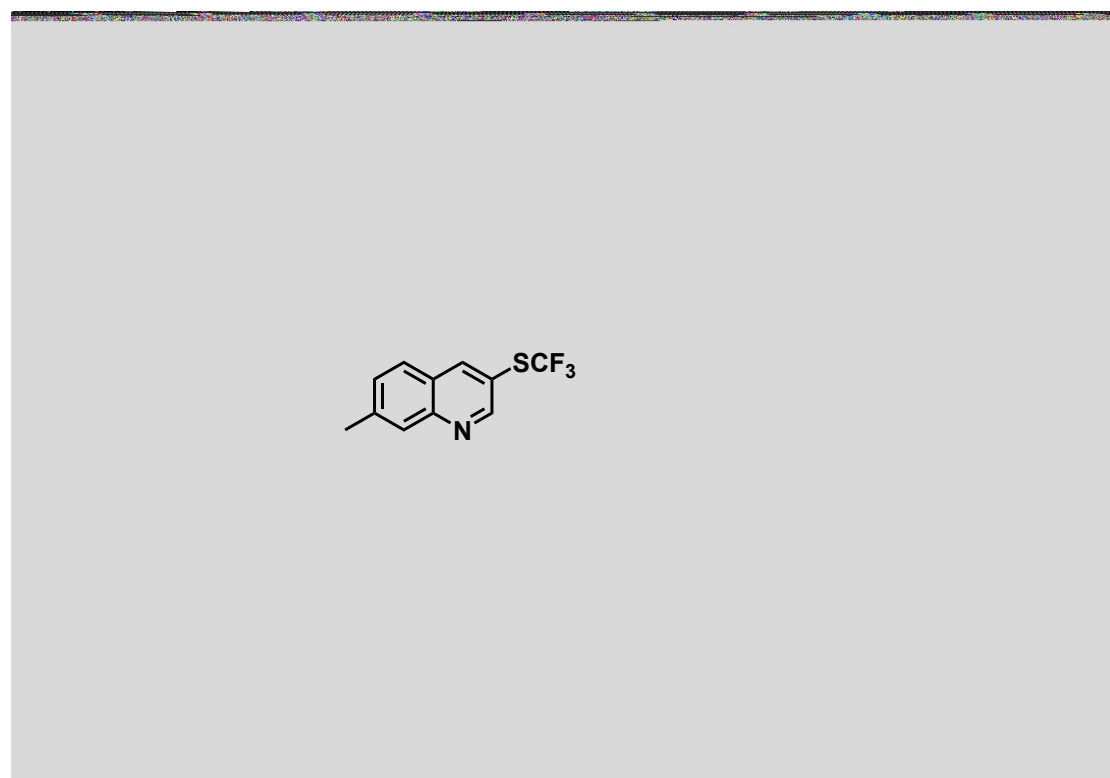

<sup>1</sup>H NMR and <sup>13</sup>C NMR of **4a**

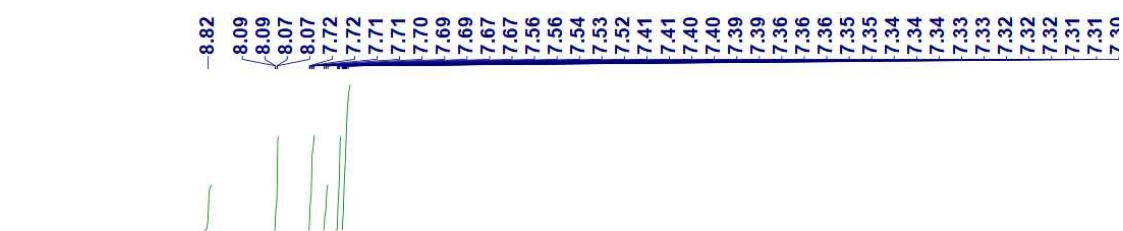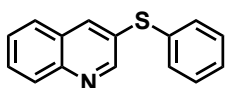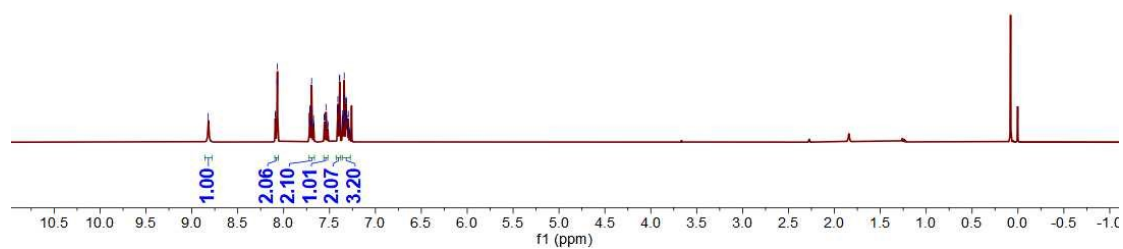

<sup>1</sup>H NMR and <sup>13</sup>C NMR of **4b**

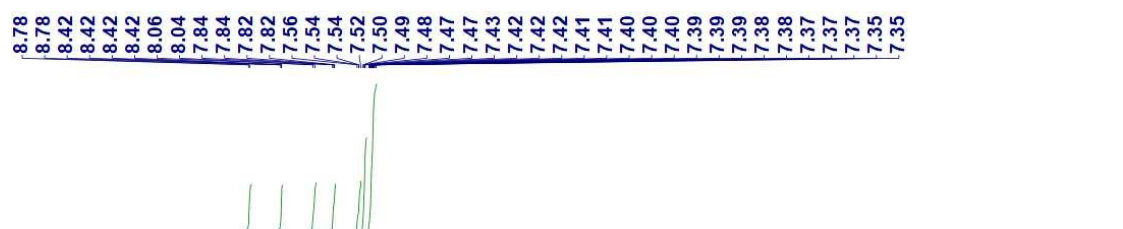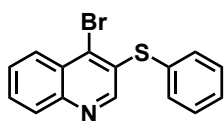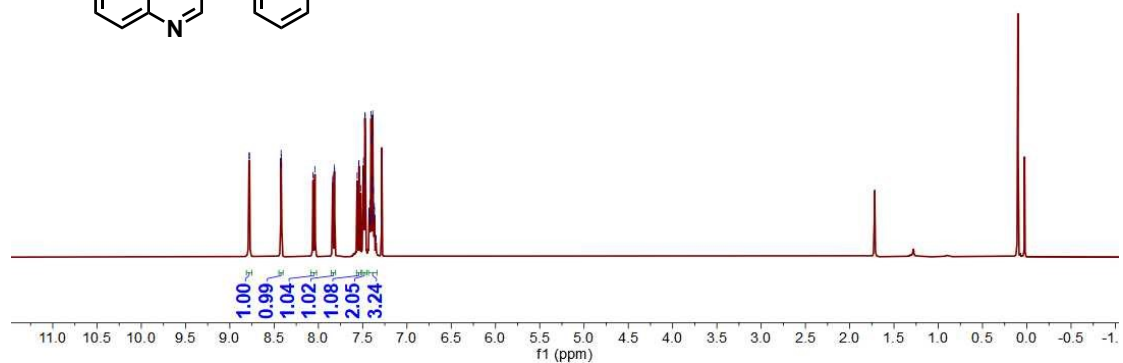

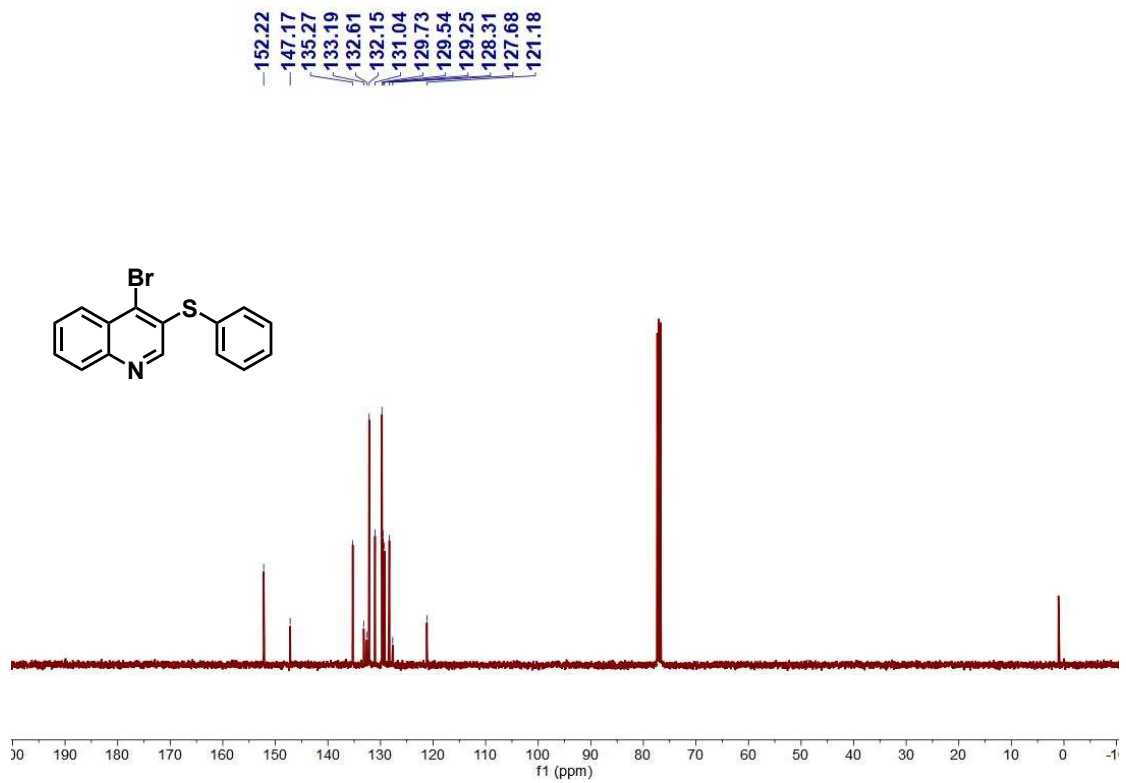

<sup>1</sup>H NMR and <sup>13</sup>C NMR of 4c

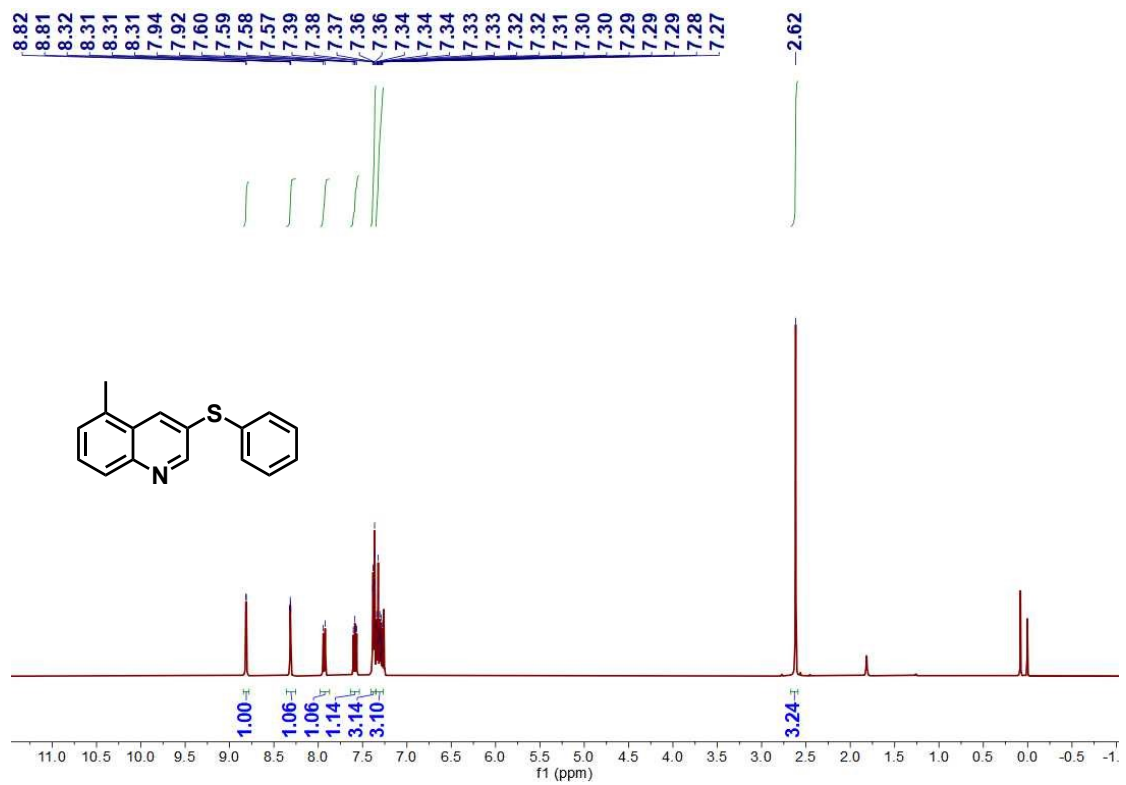

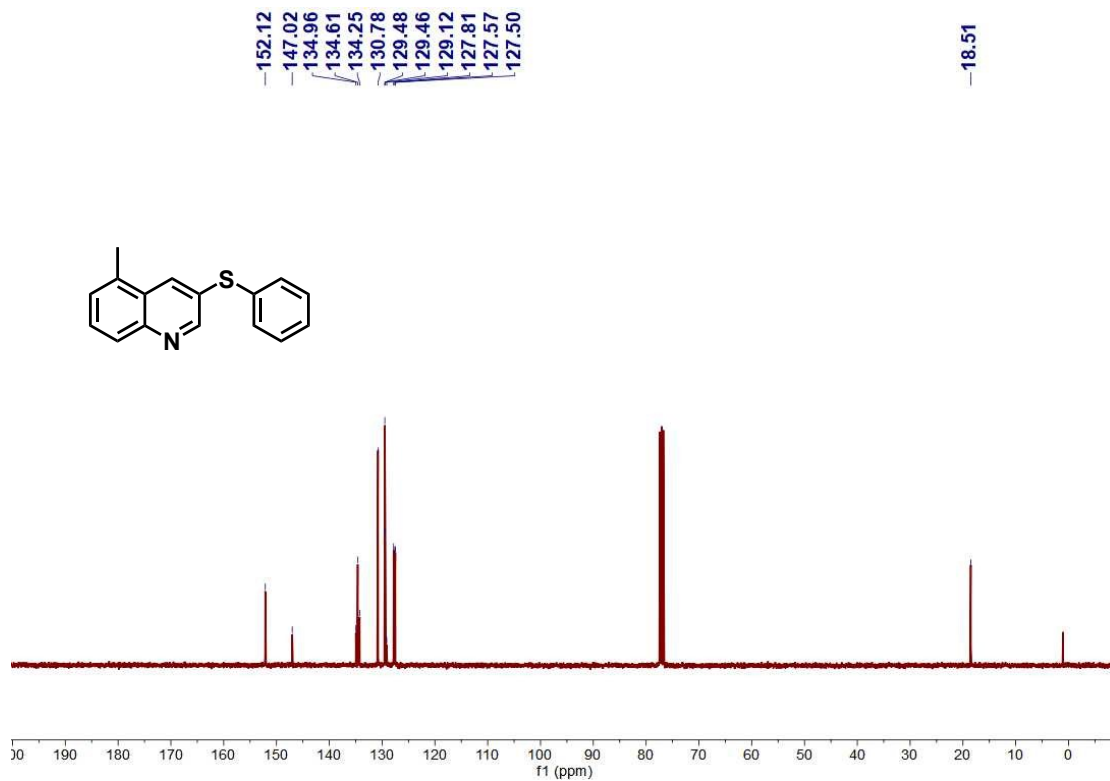

<sup>1</sup>H NMR and <sup>13</sup>C NMR of 4d

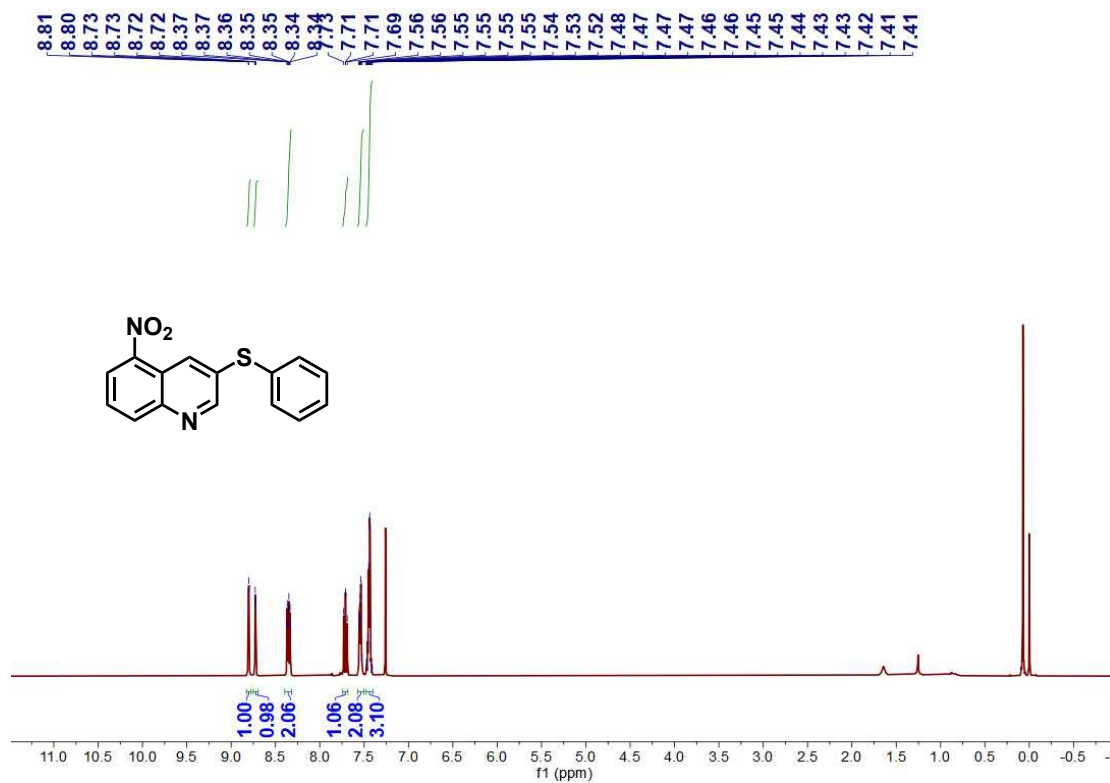

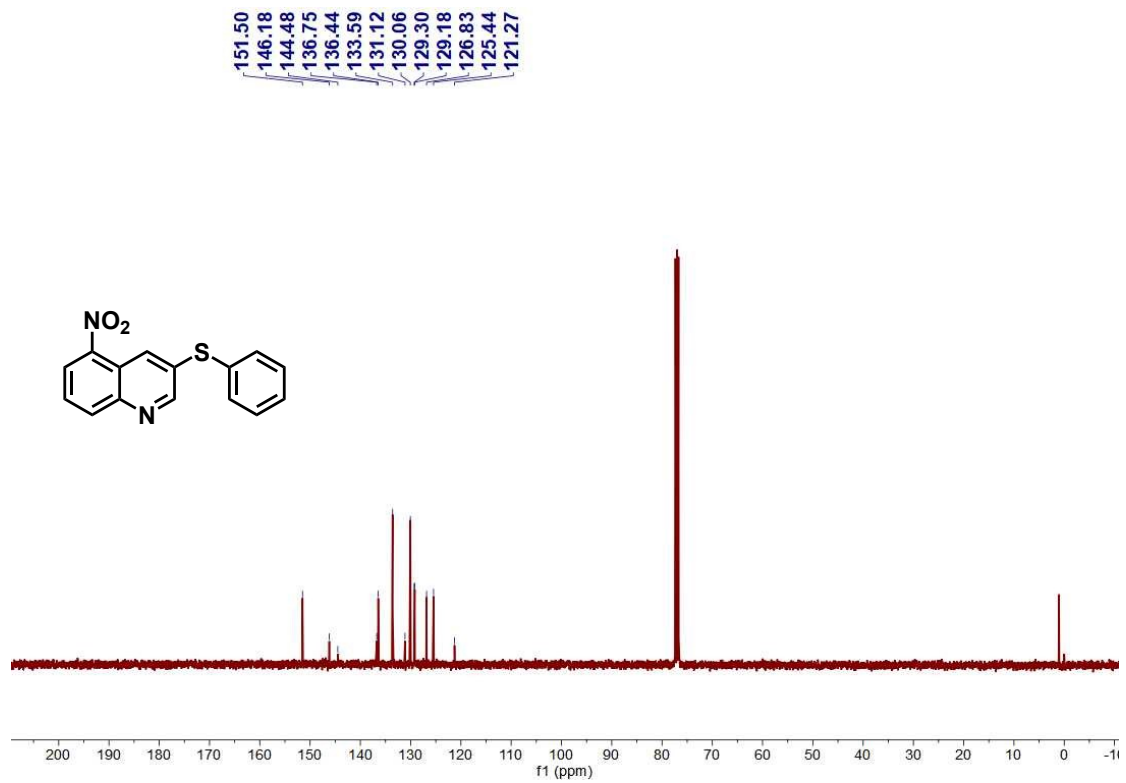

<sup>1</sup>H NMR and <sup>13</sup>C NMR of 4e

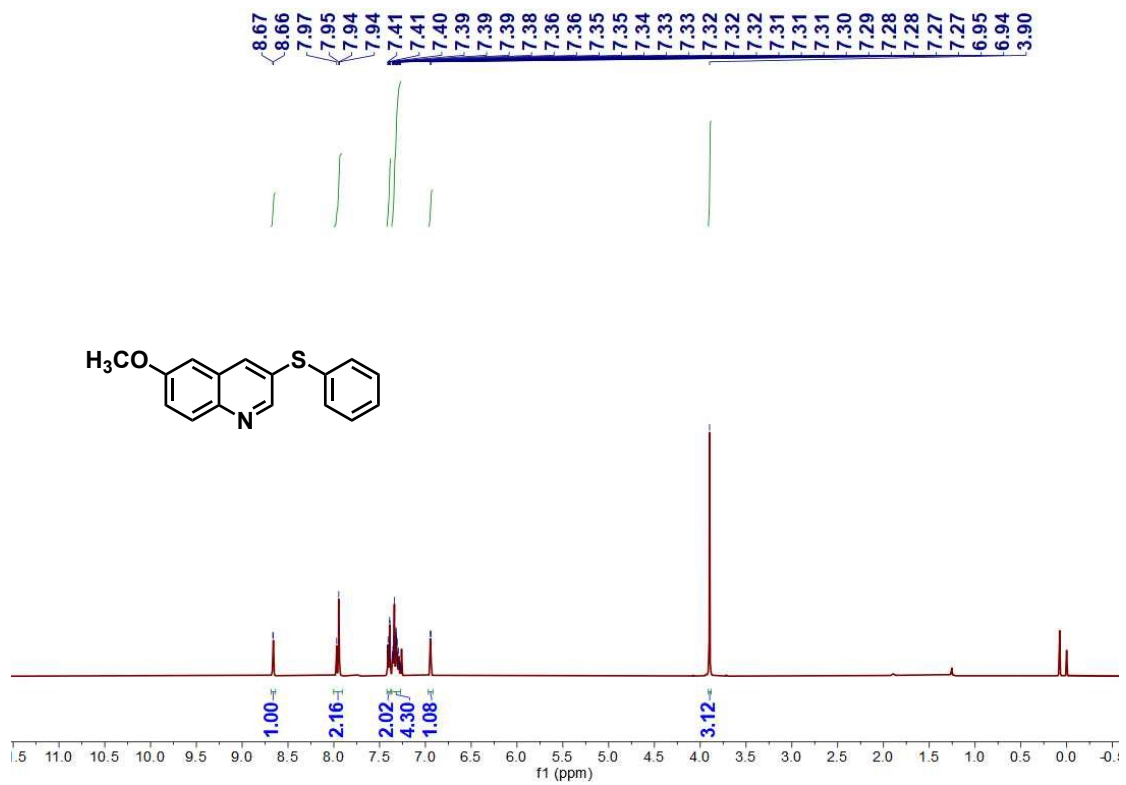

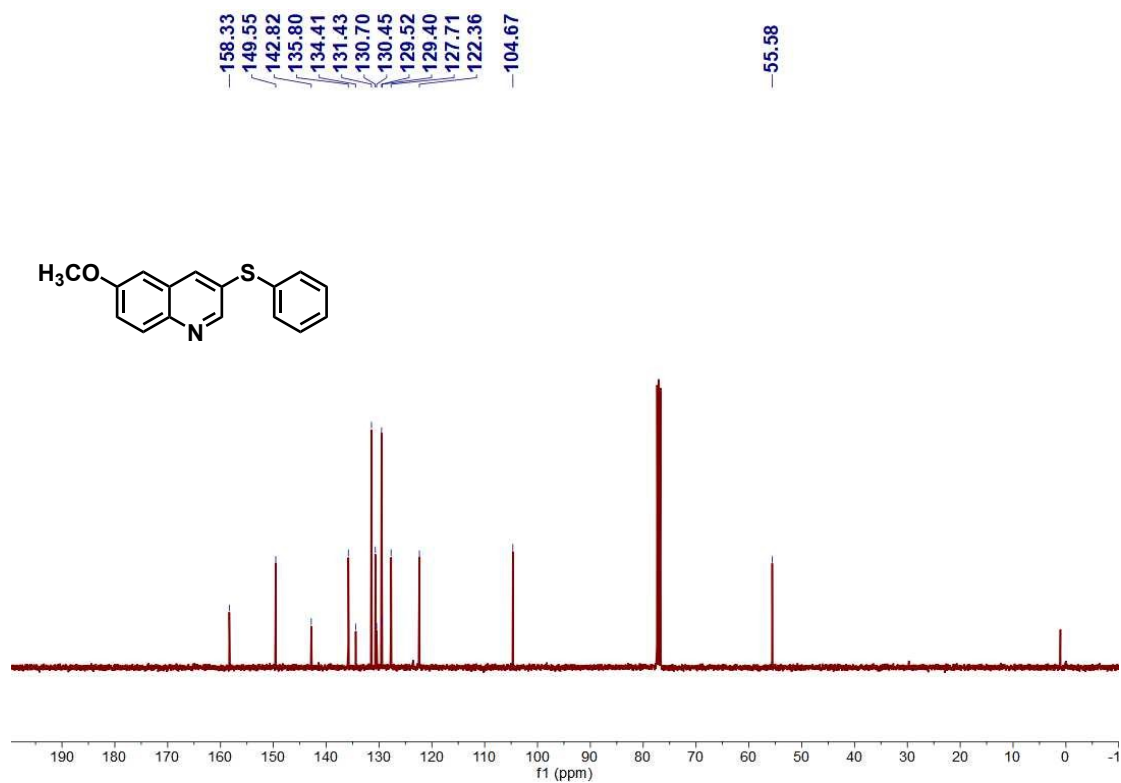

$^1\text{H}$  NMR and  $^{13}\text{C}$  NMR of **4f**

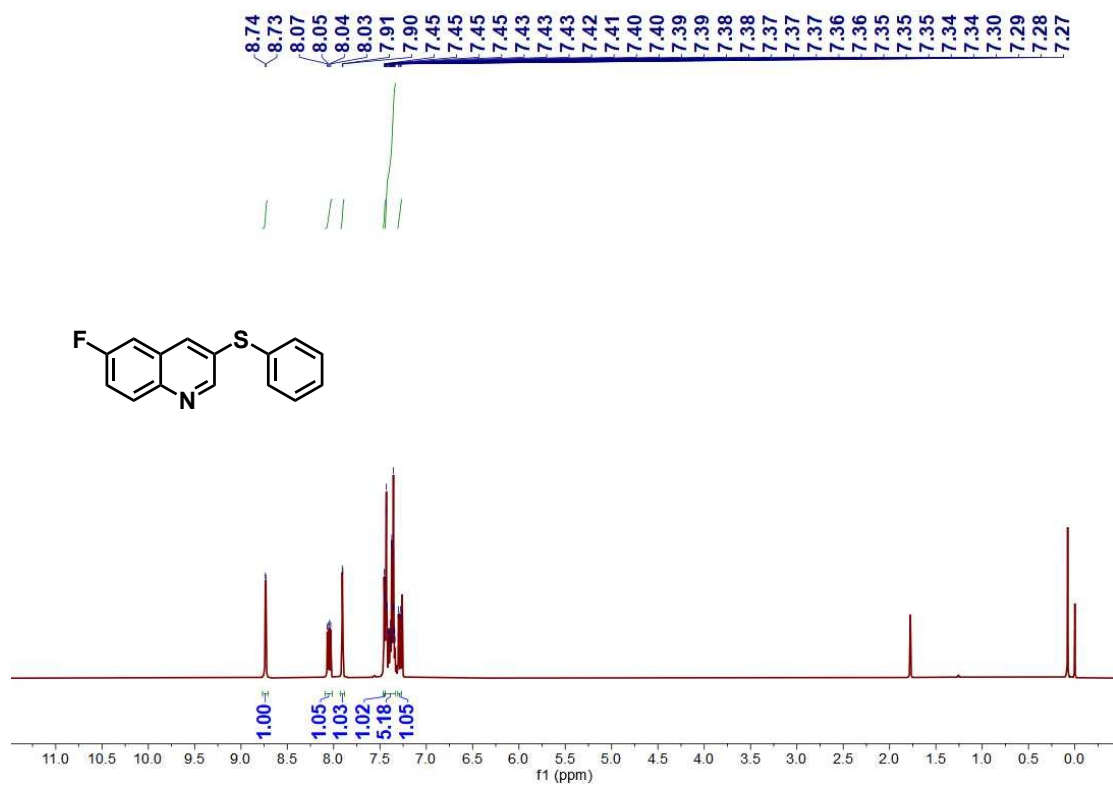

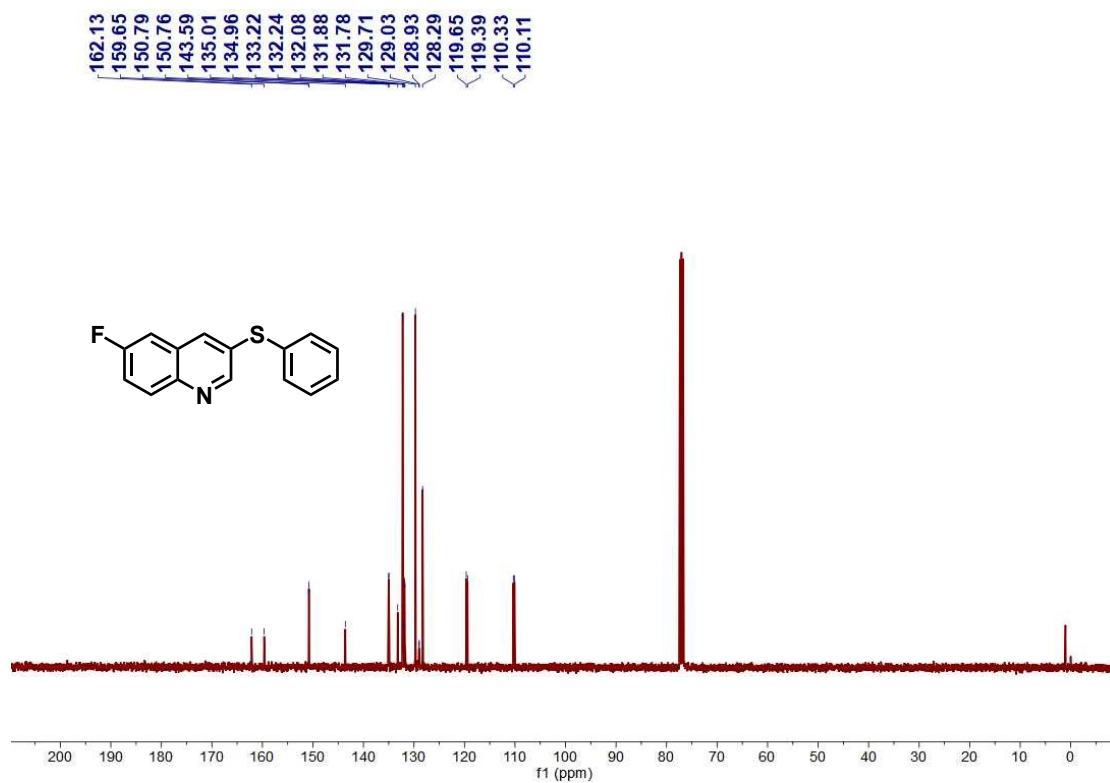

<sup>1</sup>H NMR and <sup>13</sup>C NMR of 4g

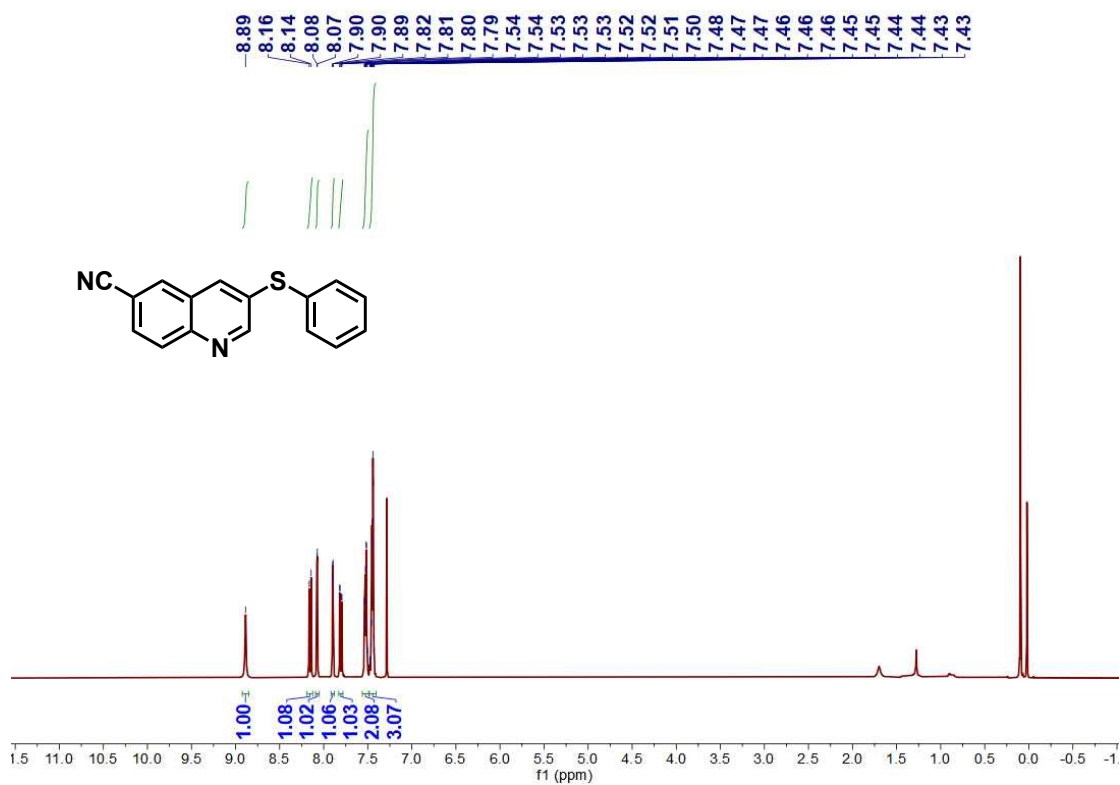

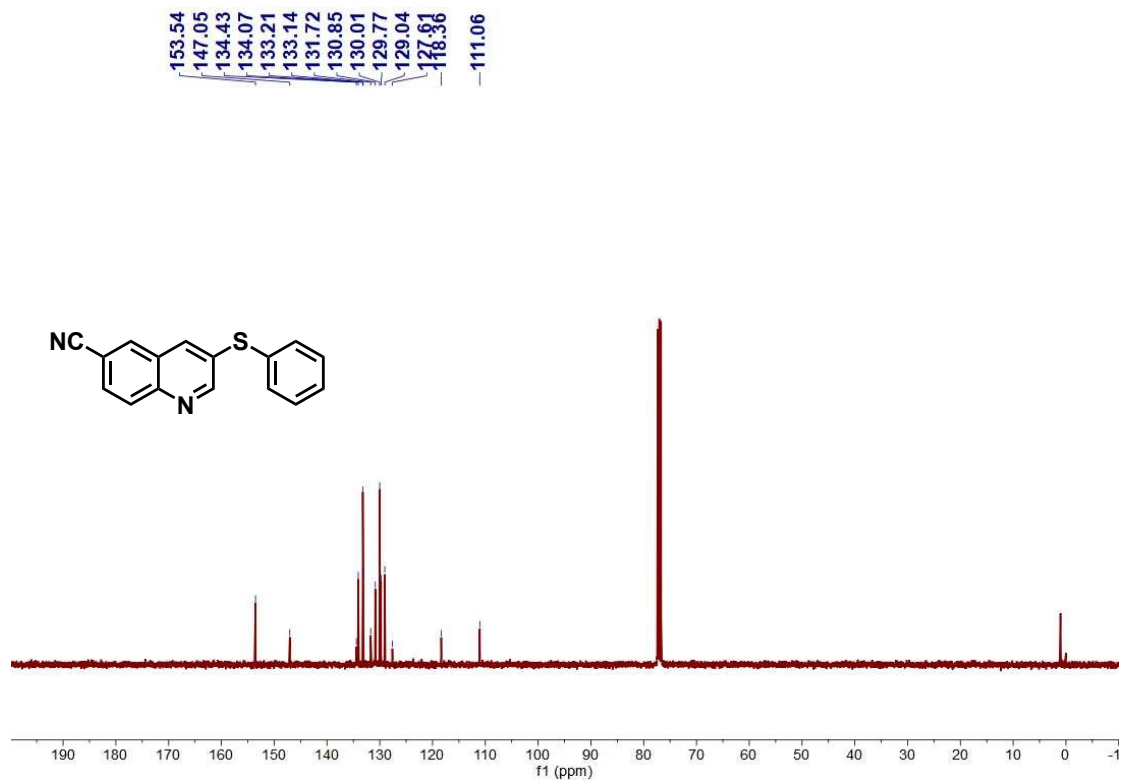

<sup>1</sup>H NMR and <sup>13</sup>C NMR of **4h**

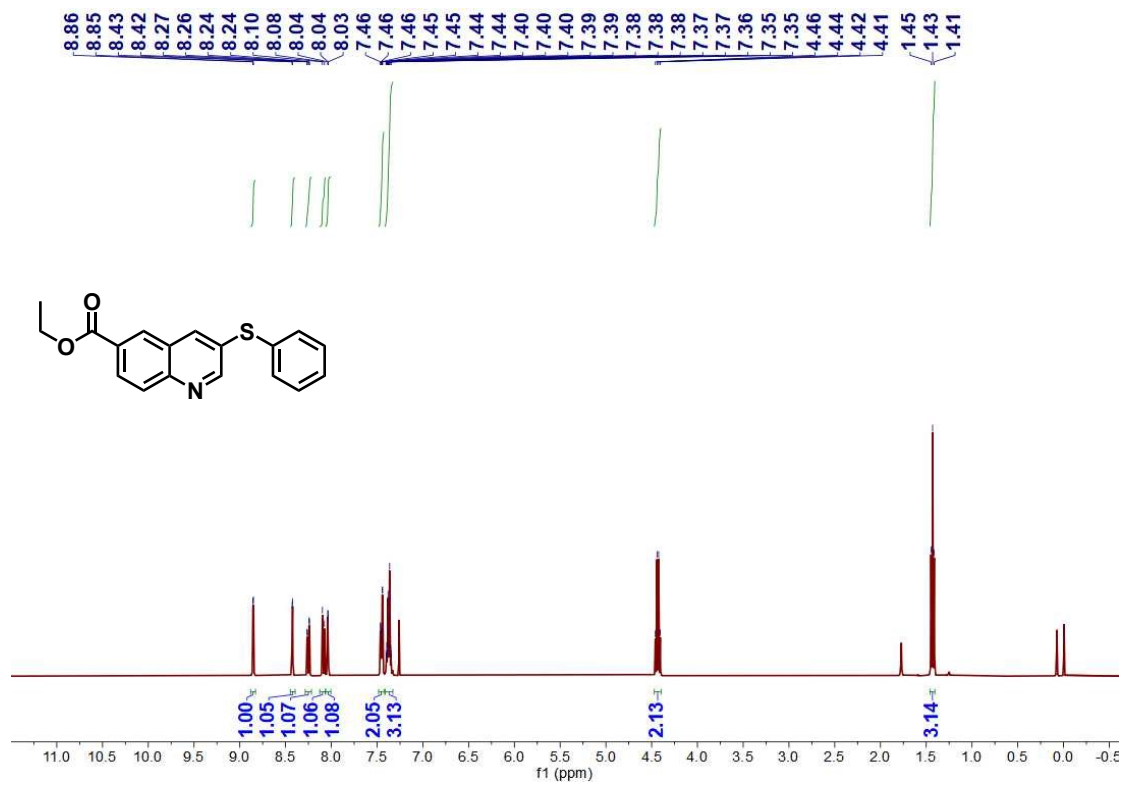



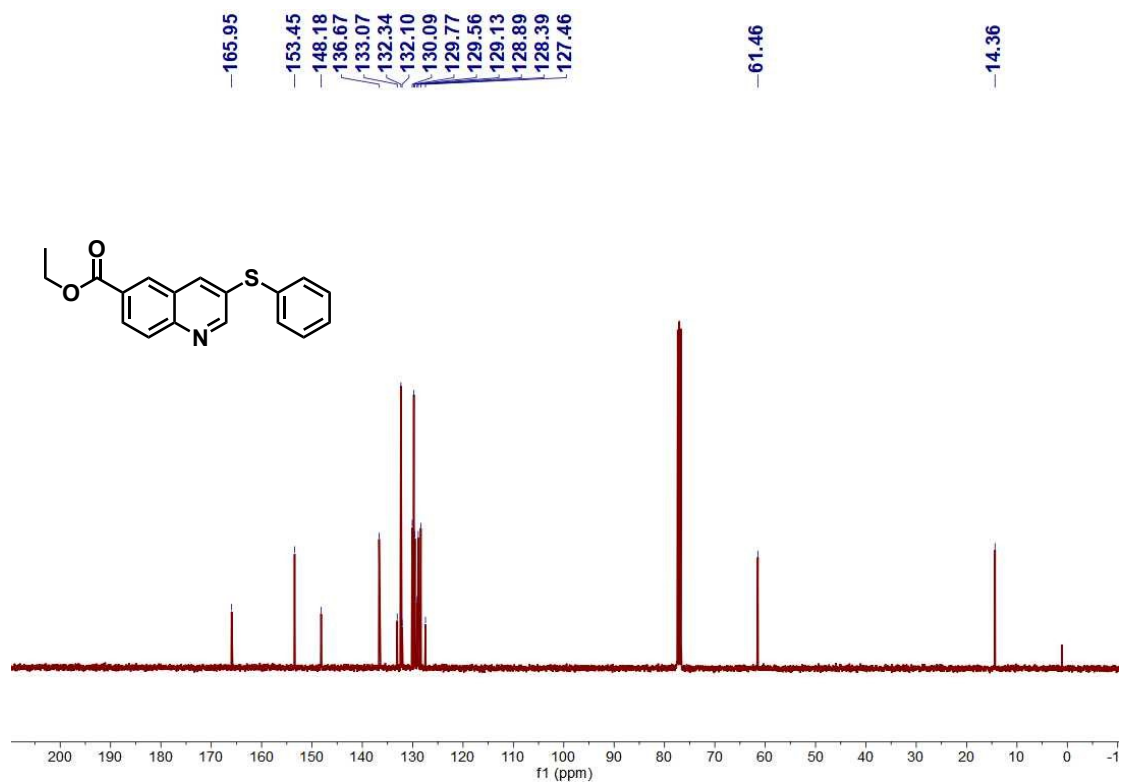

**<sup>1</sup>H NMR and <sup>13</sup>C NMR of 4i**

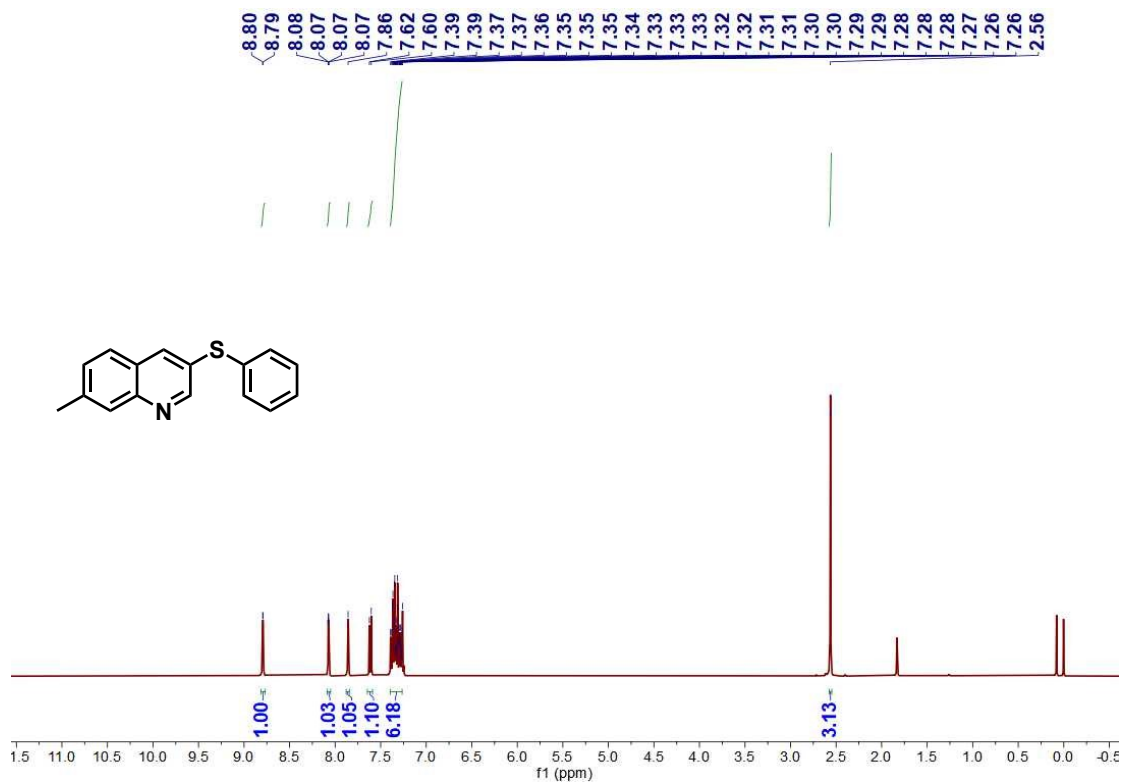

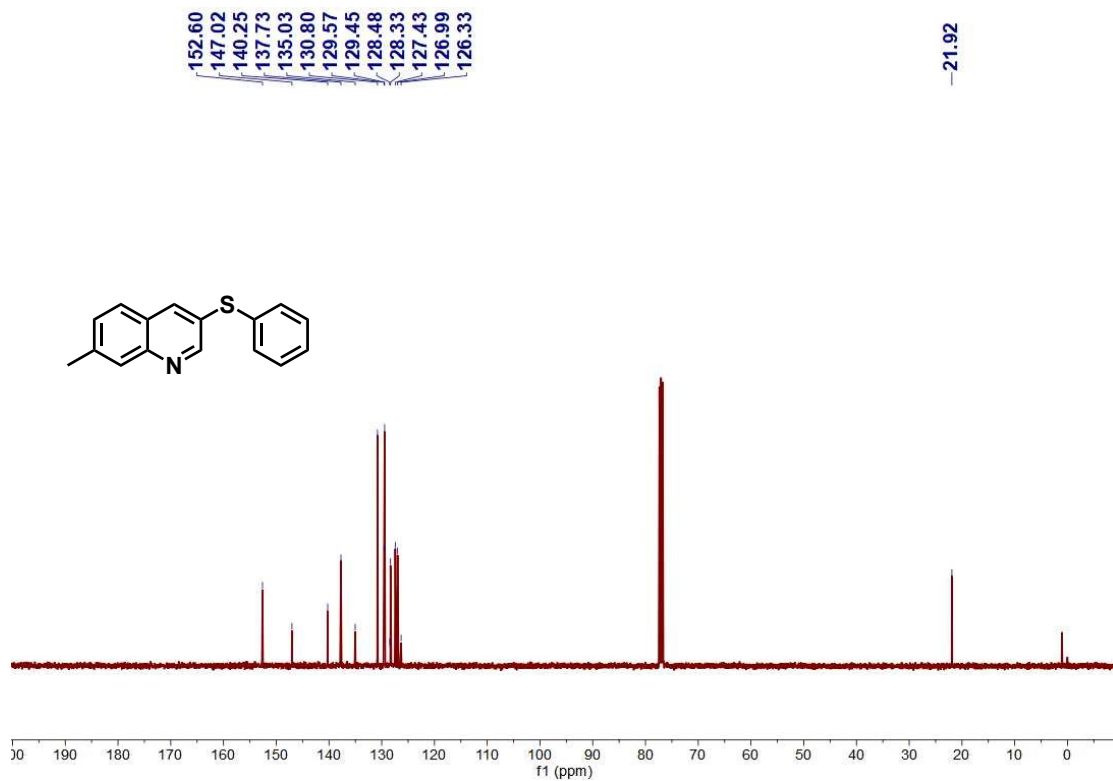

<sup>1</sup>H NMR and <sup>13</sup>C NMR of 4j

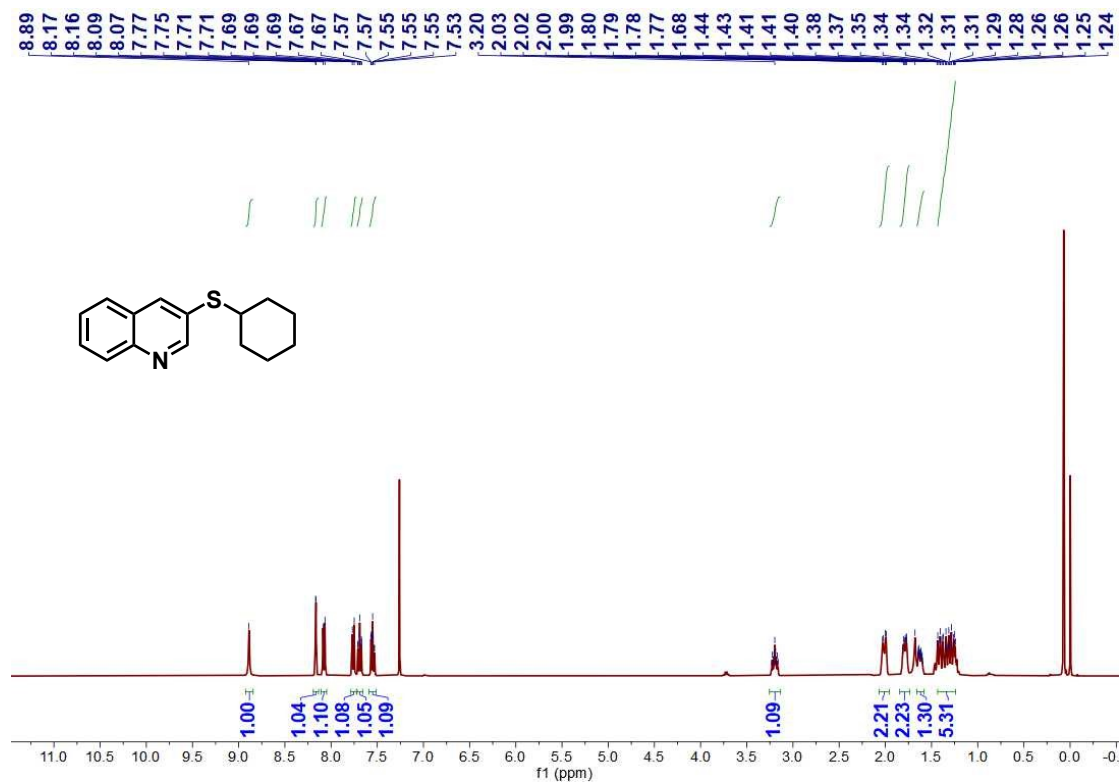

<sup>1</sup>H NMR and <sup>13</sup>C NMR of **4k**

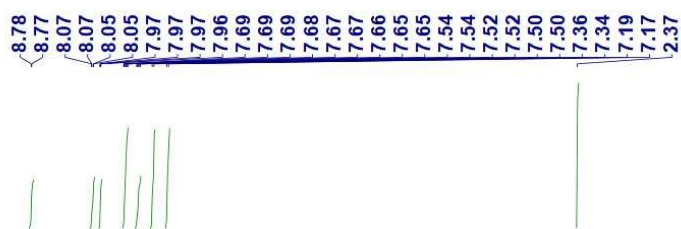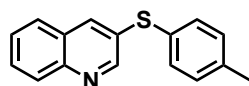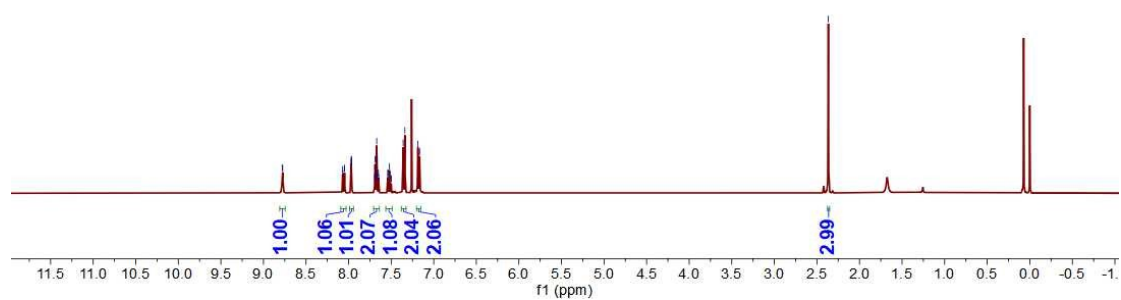

<sup>1</sup>H NMR and <sup>13</sup>C NMR of **4l**

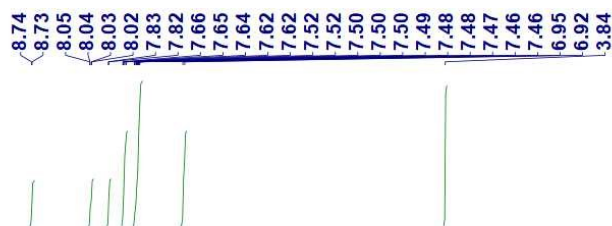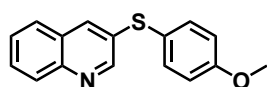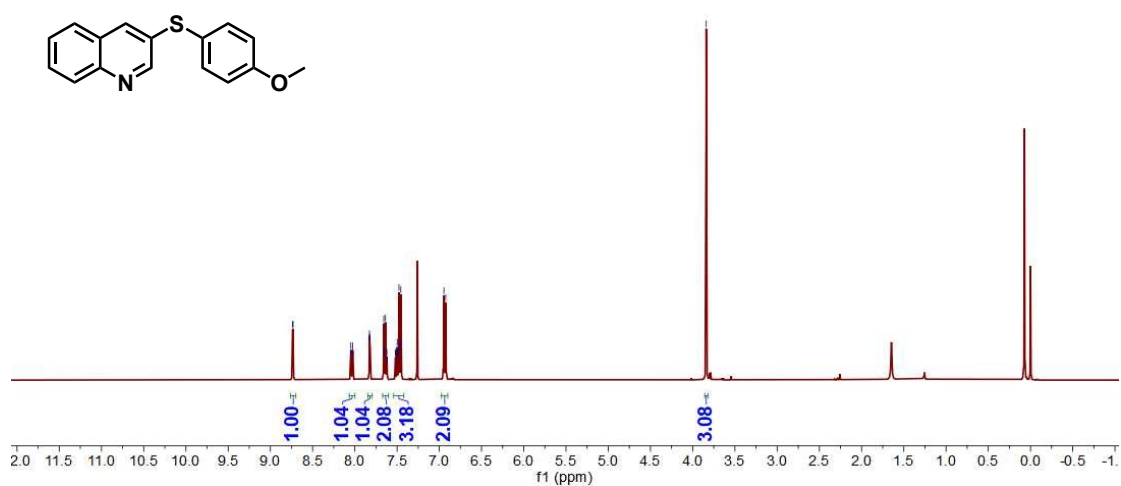

<sup>1</sup>H NMR and <sup>13</sup>C NMR of 4m

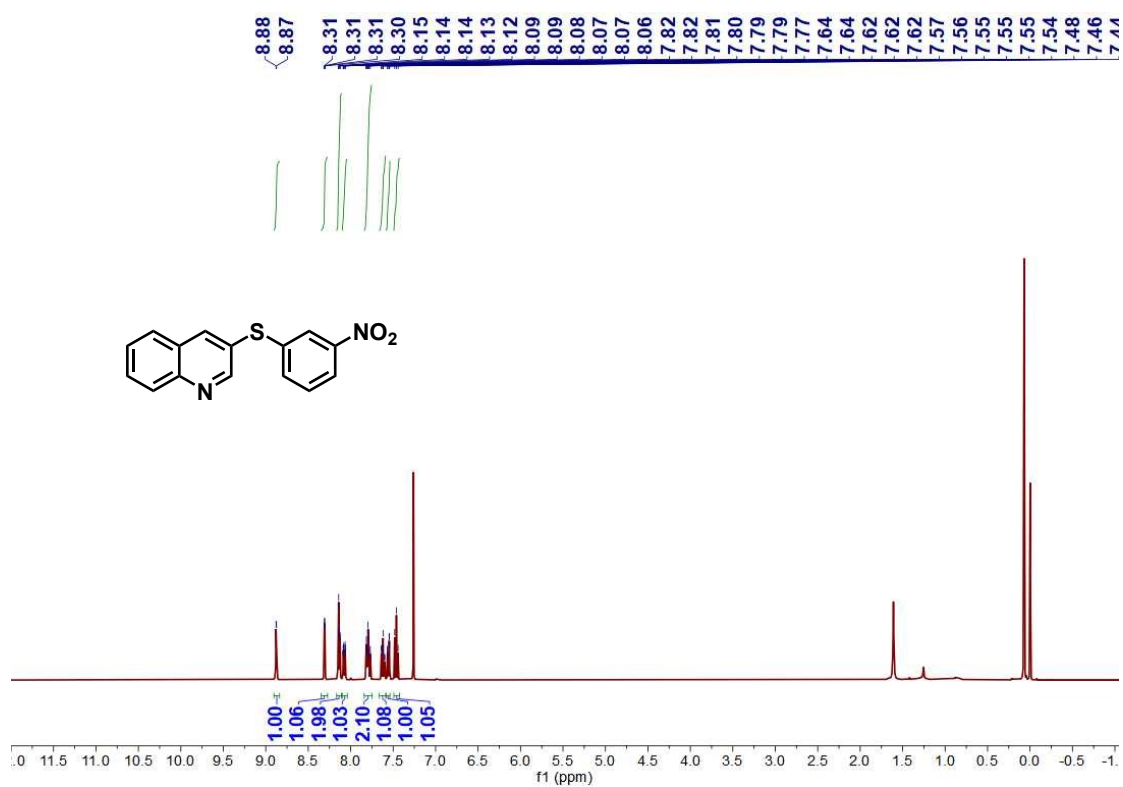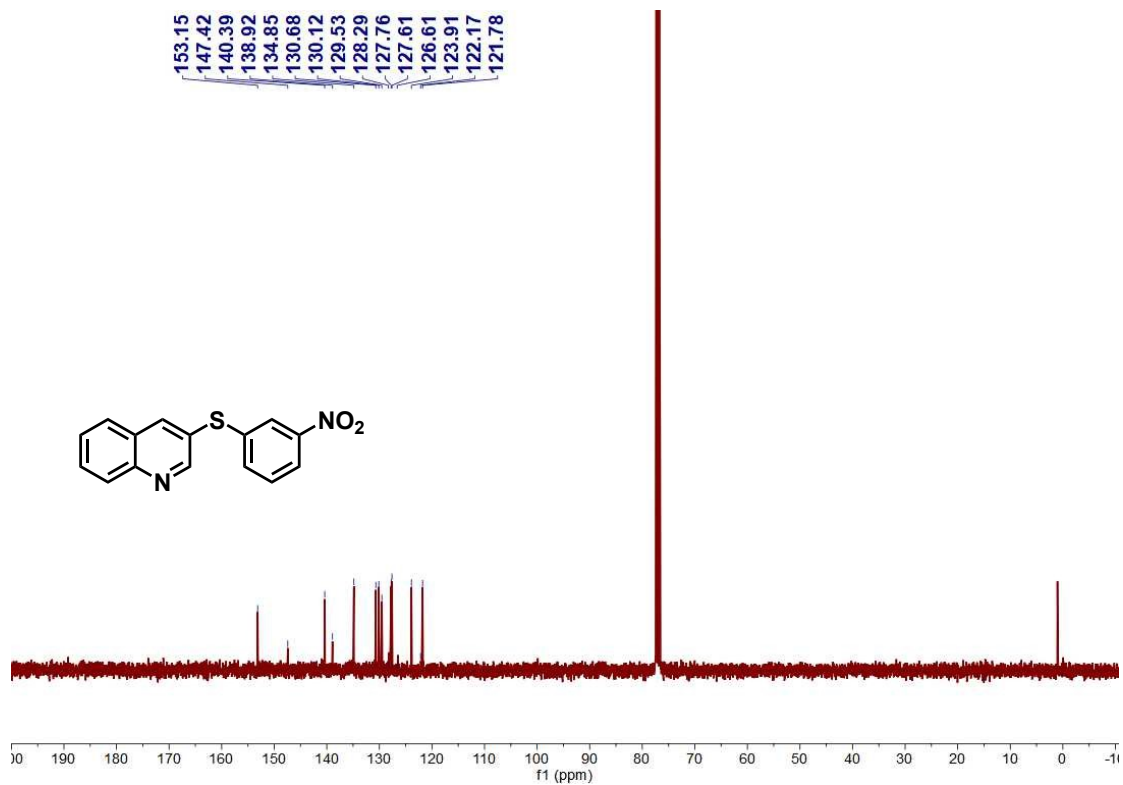

$^1\text{H}$  NMR and  $^{13}\text{C}$  NMR of **4n**

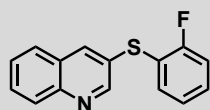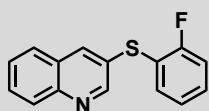

### <sup>1</sup>H NMR of 4o

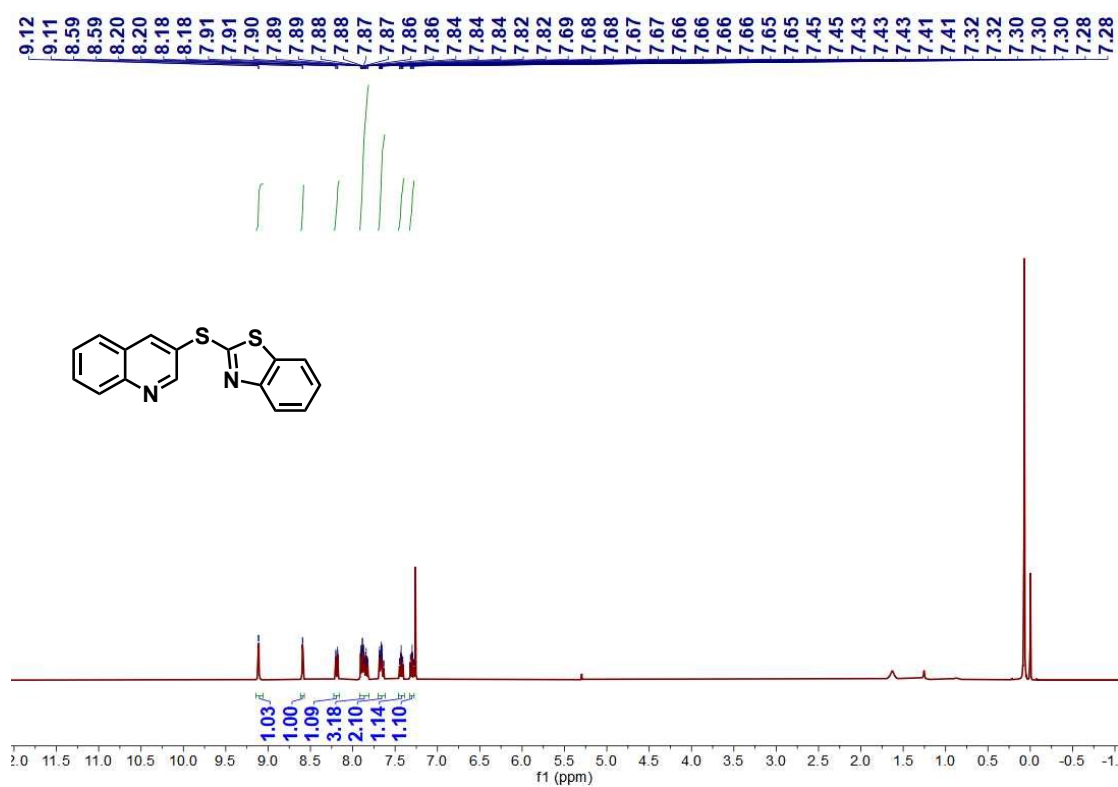

### <sup>1</sup>H NMR and <sup>13</sup>C NMR of 4p

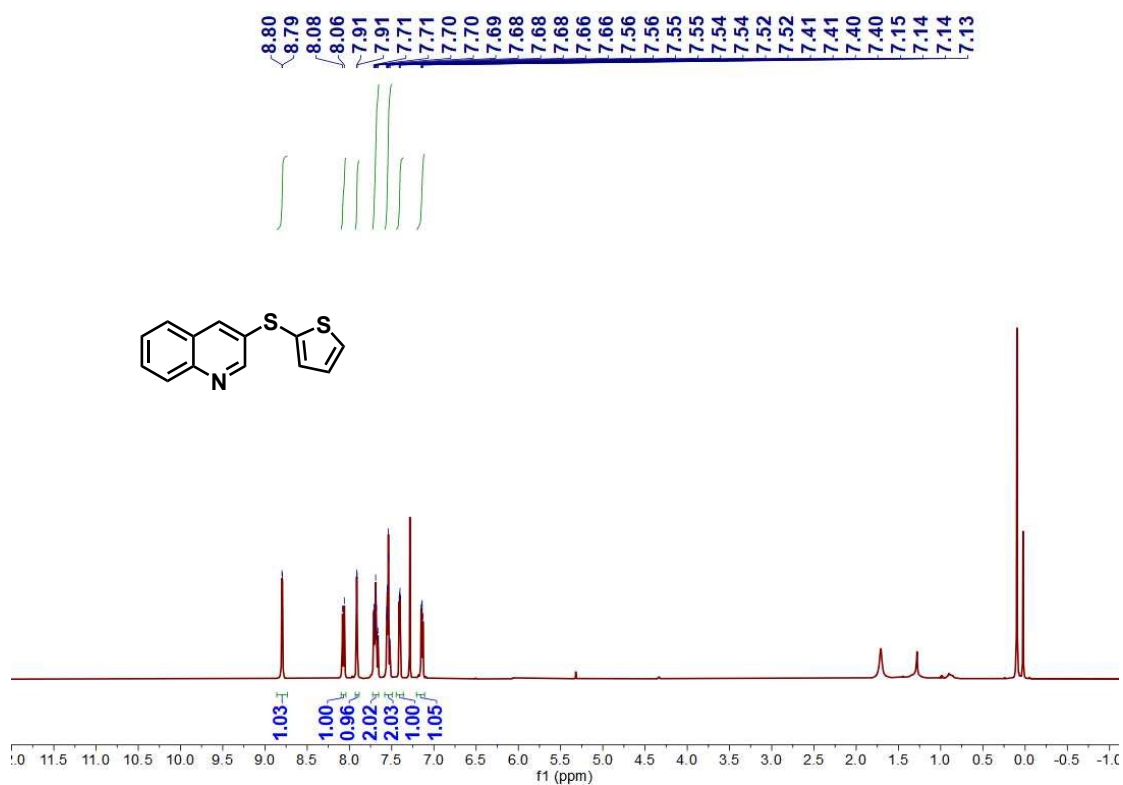

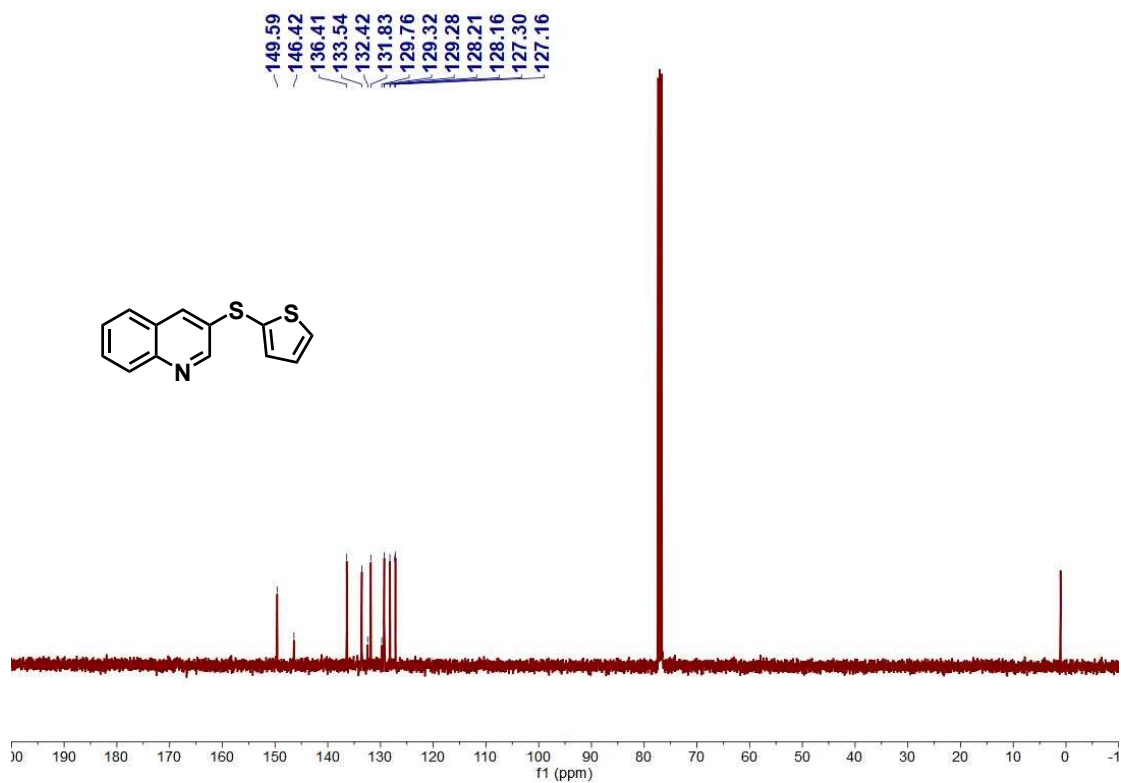

<sup>1</sup>H NMR of 4q

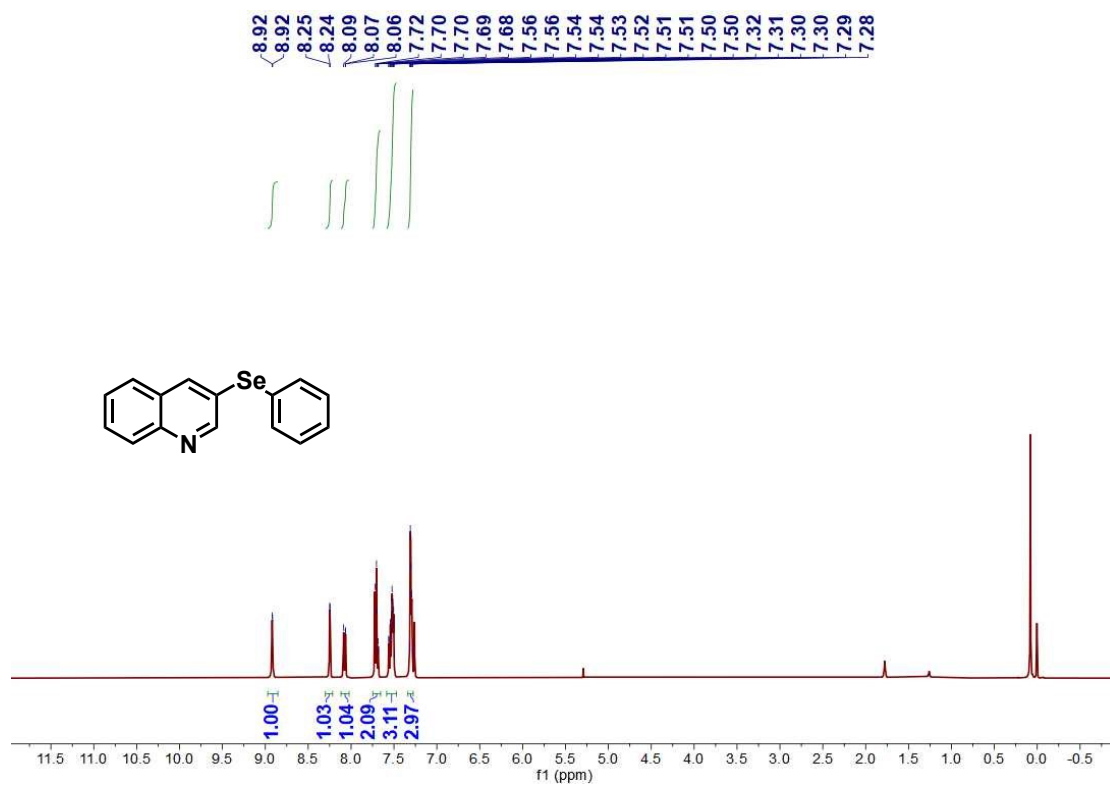

<sup>1</sup>H NMR of 4aa

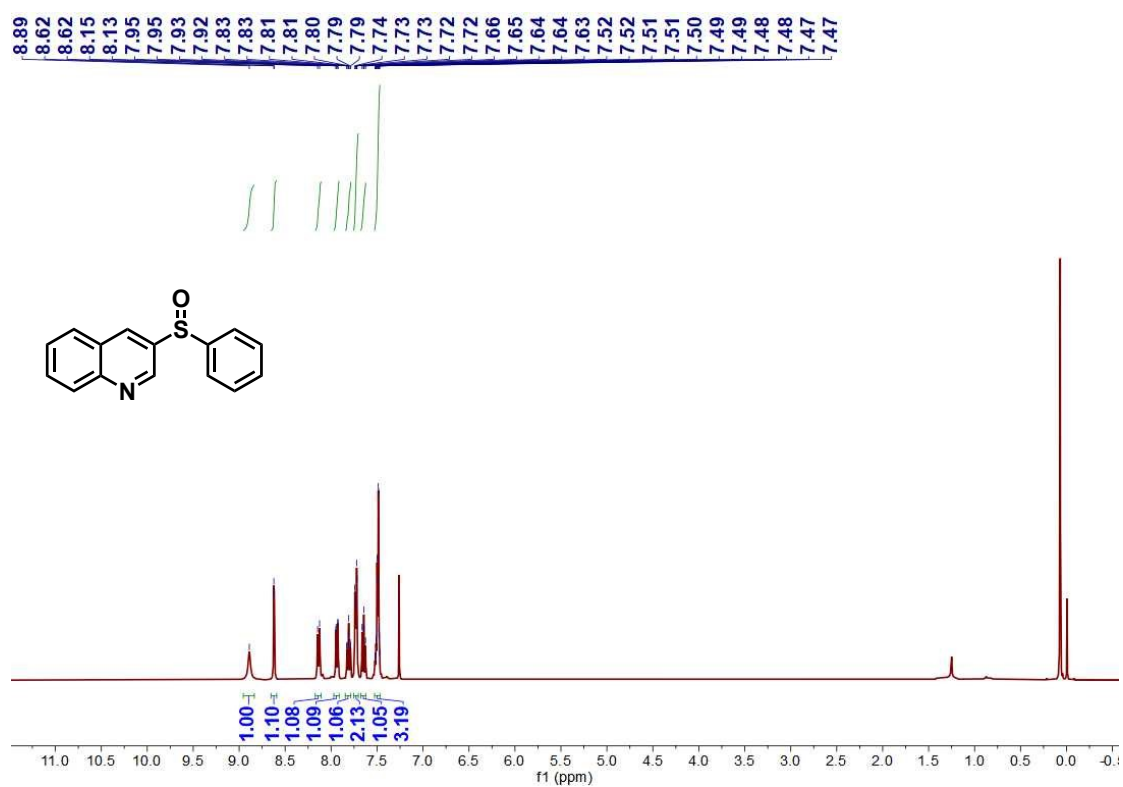

<sup>1</sup>H NMR of 4ab

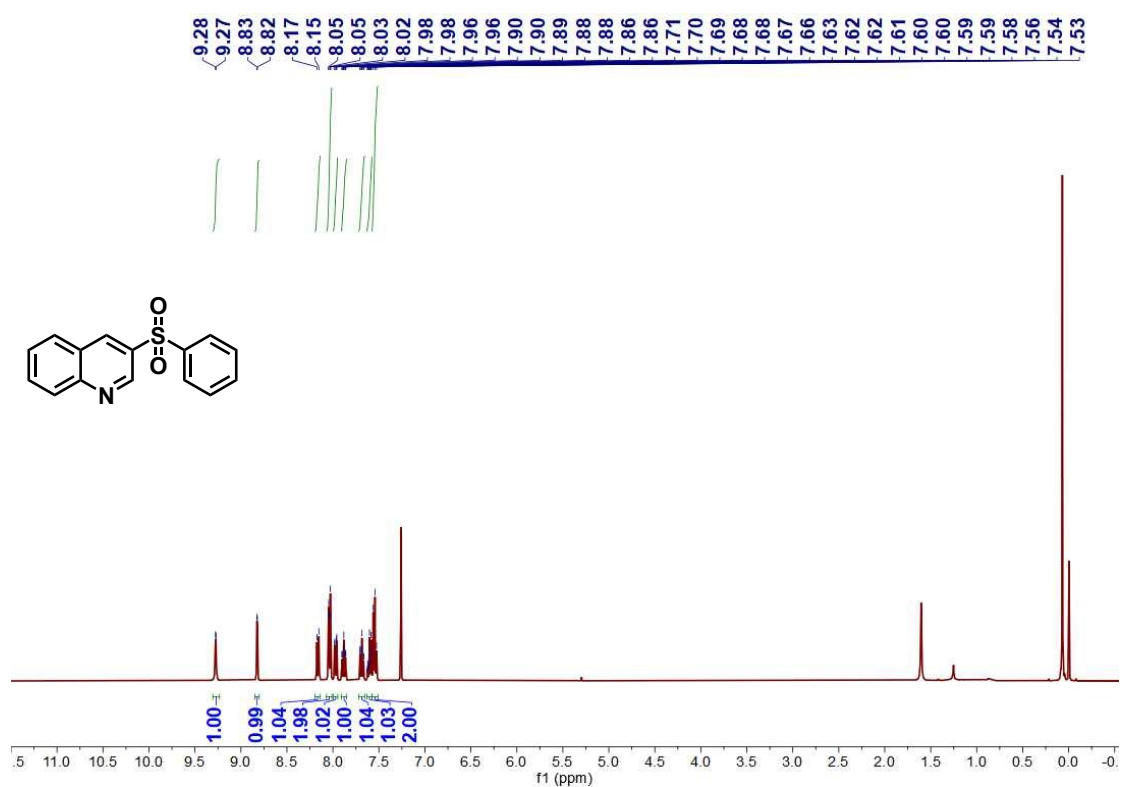



<sup>1</sup>H NMR, <sup>13</sup>C NMR and <sup>19</sup>F NMR of **5a**

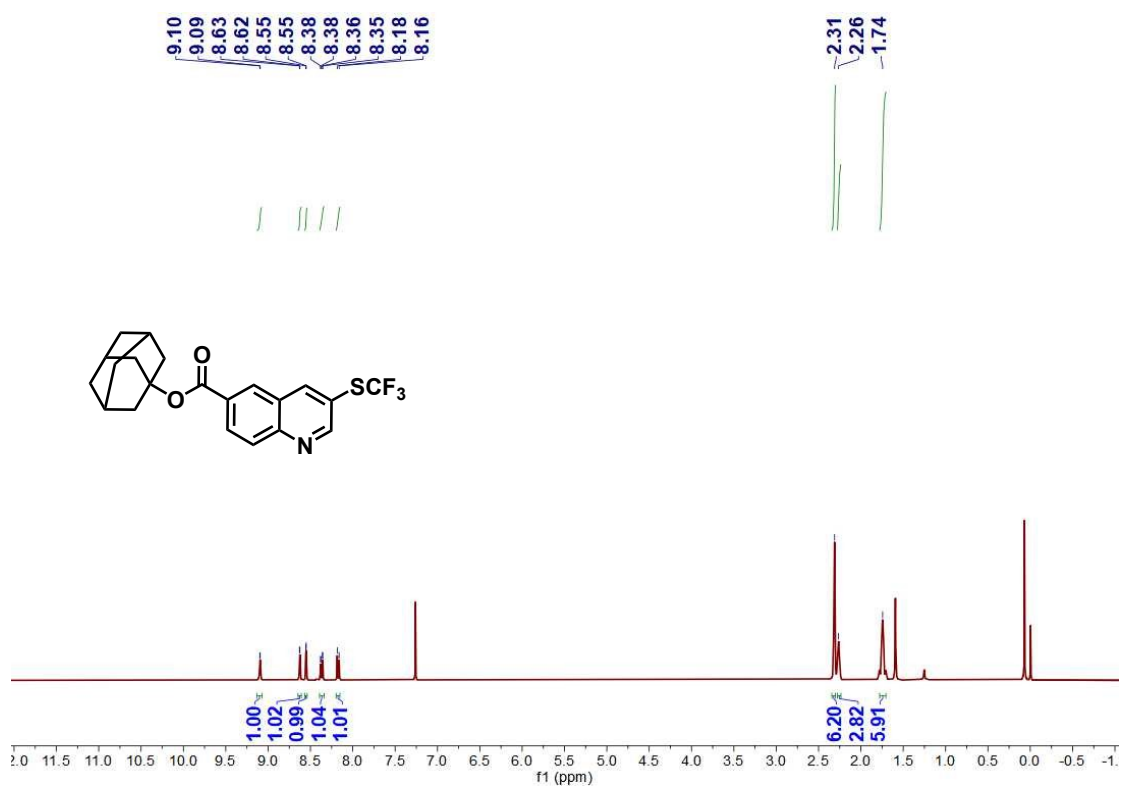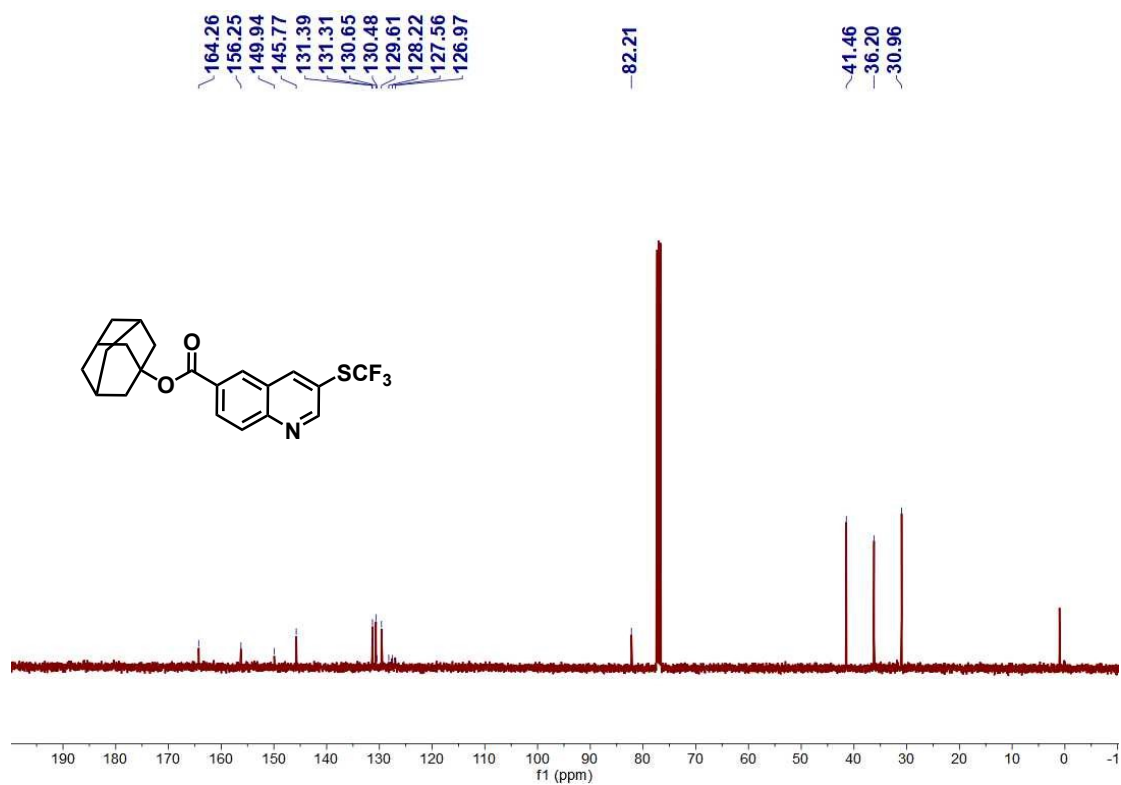

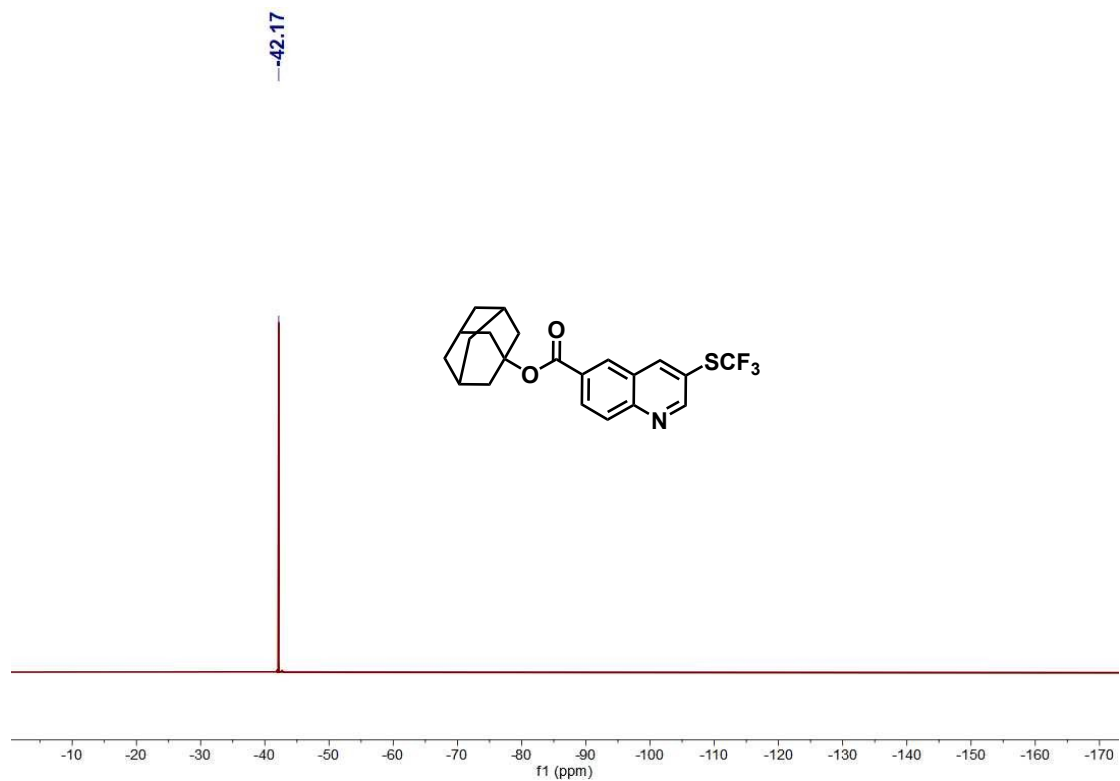

<sup>1</sup>H NMR and <sup>13</sup>C NMR of **5b**

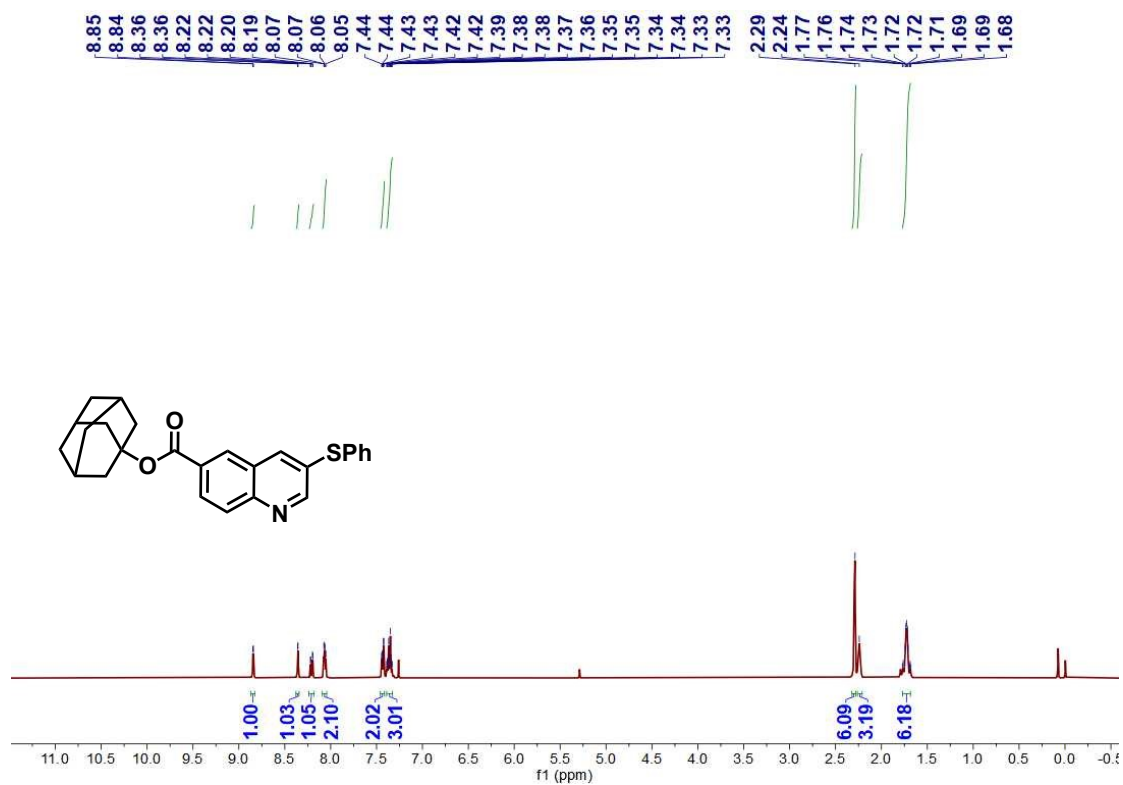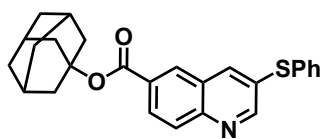

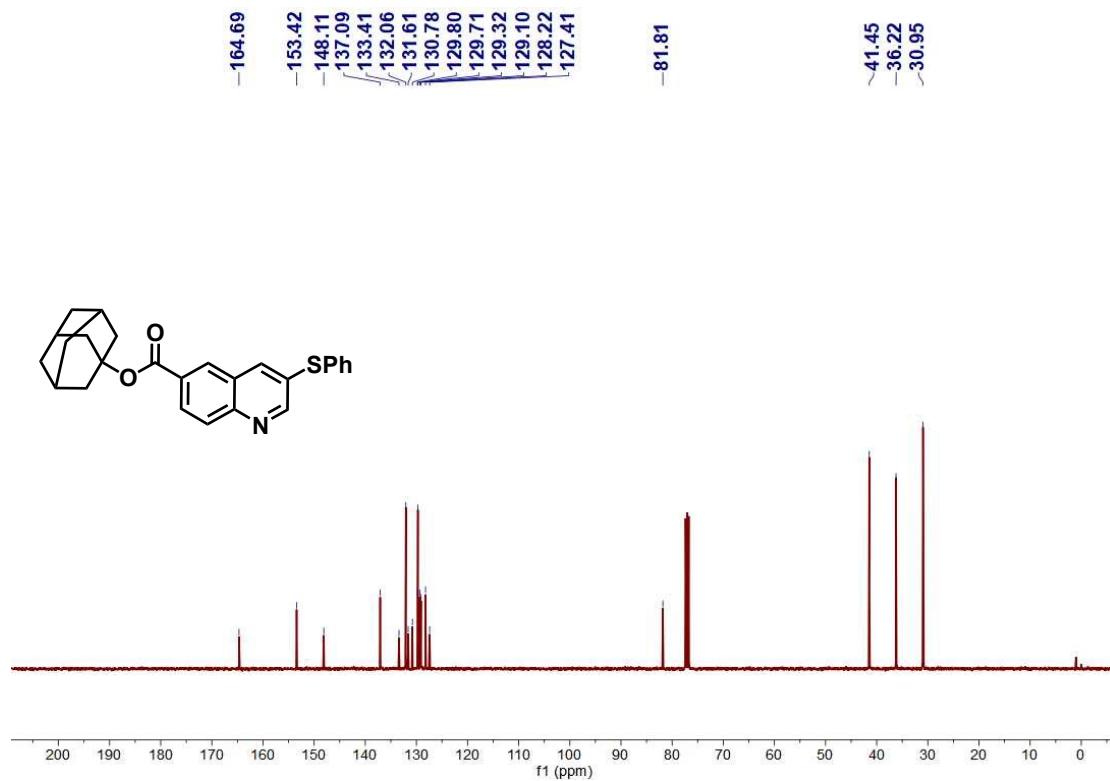

<sup>1</sup>H NMR, <sup>13</sup>C NMR and <sup>19</sup>F NMR of **6a**

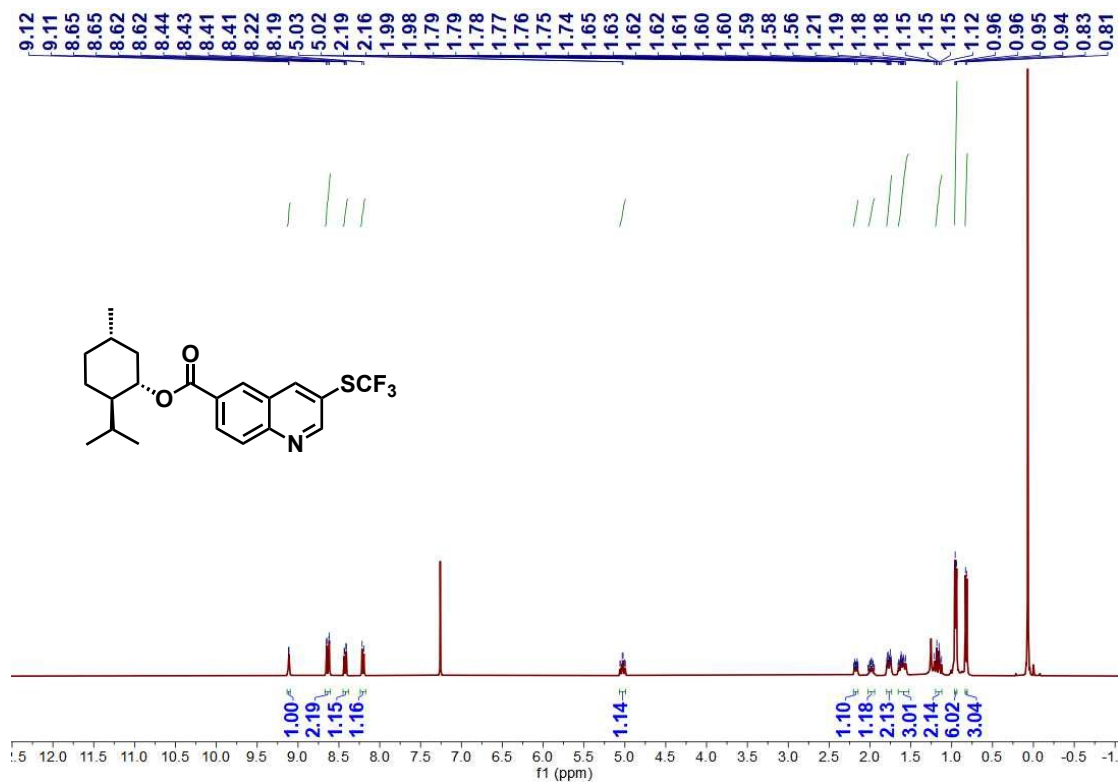

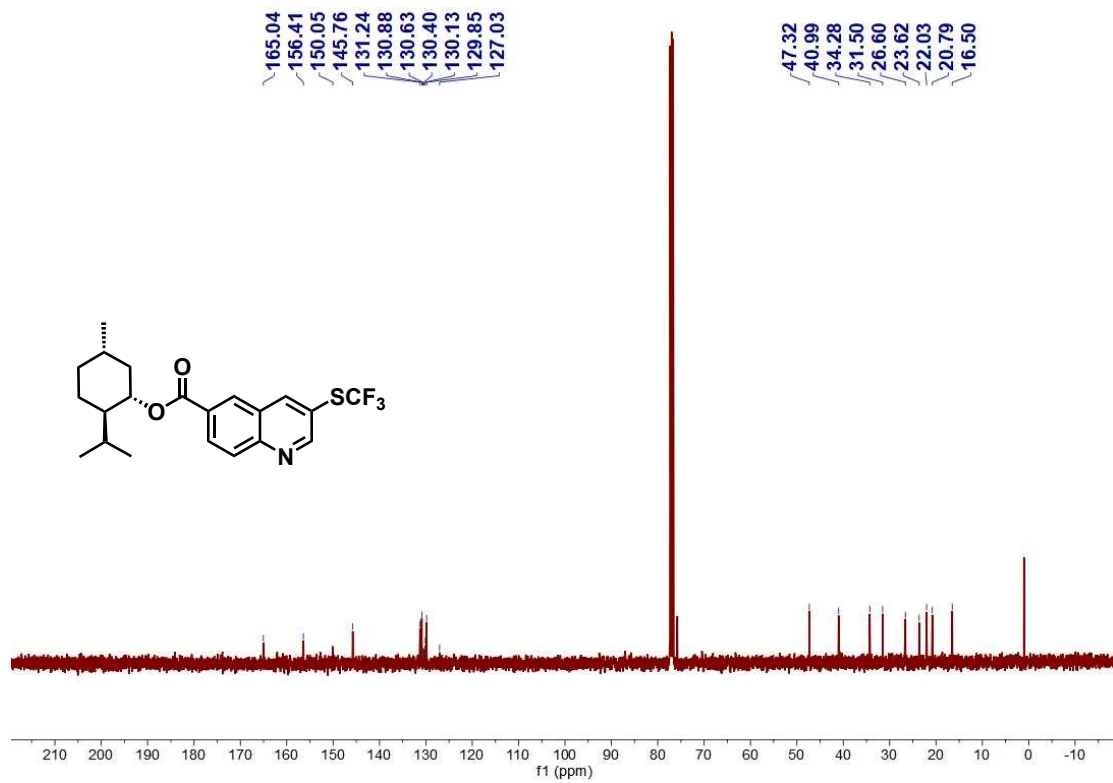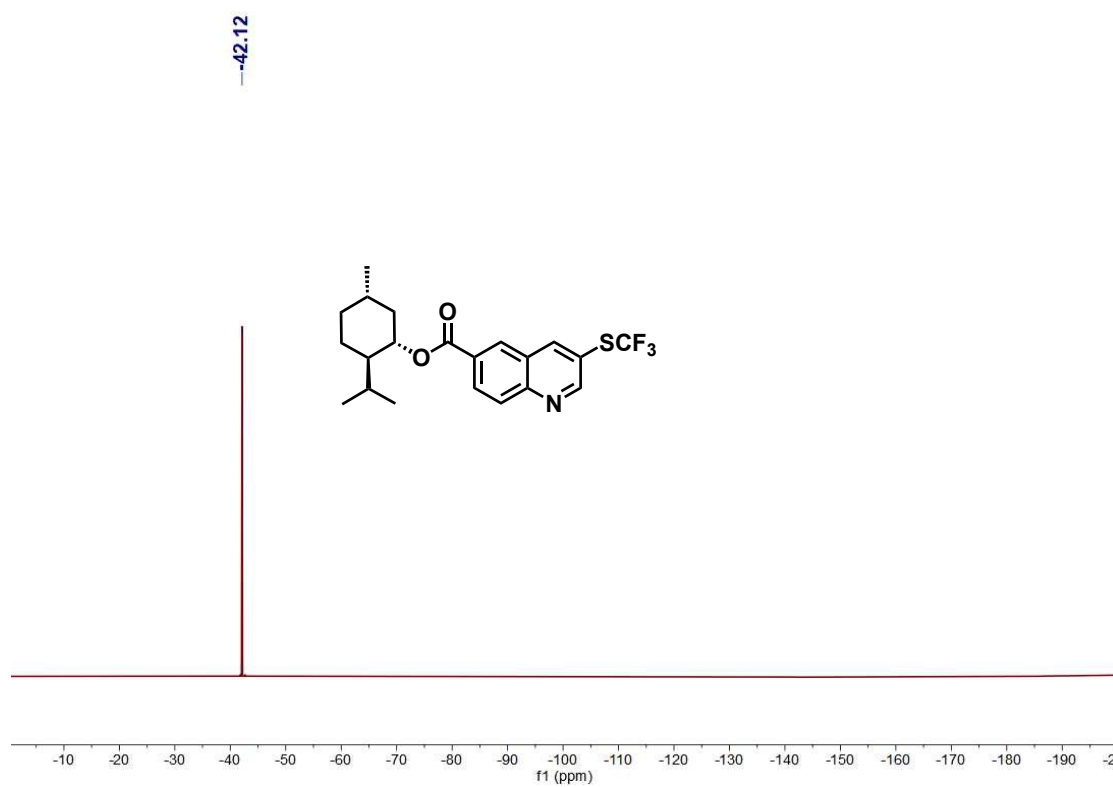

<sup>1</sup>H NMR and <sup>13</sup>C NMR of **6b**

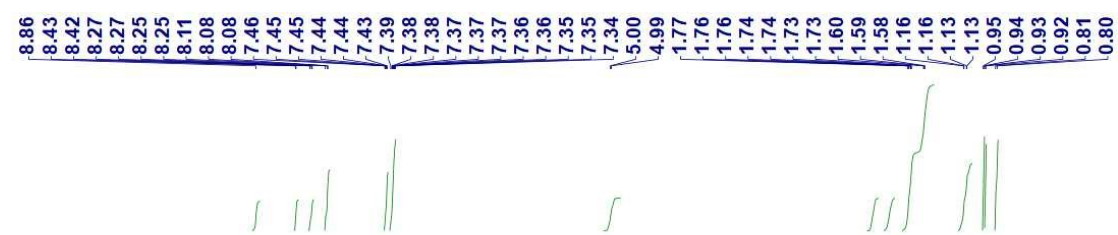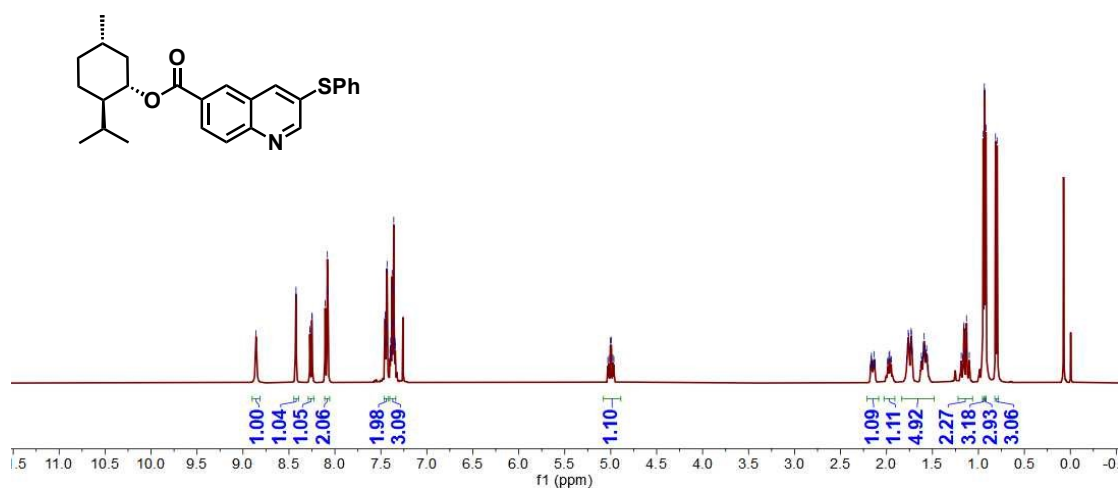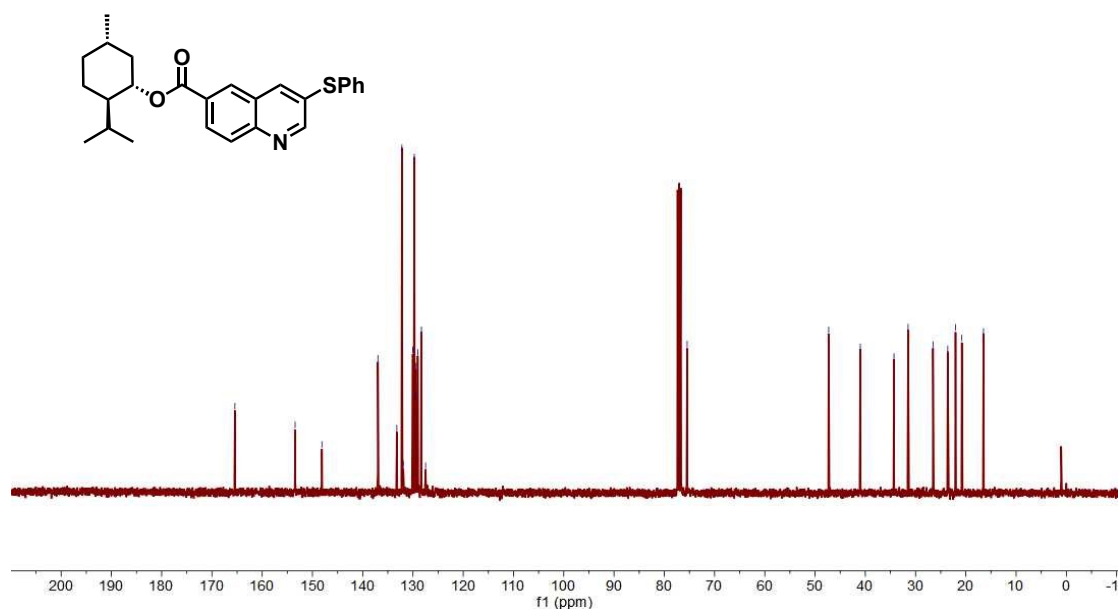

<sup>1</sup>H NMR, <sup>13</sup>C NMR and <sup>19</sup>F NMR of 7a

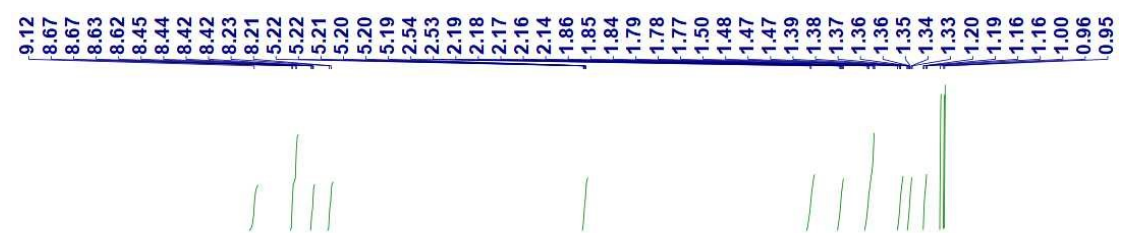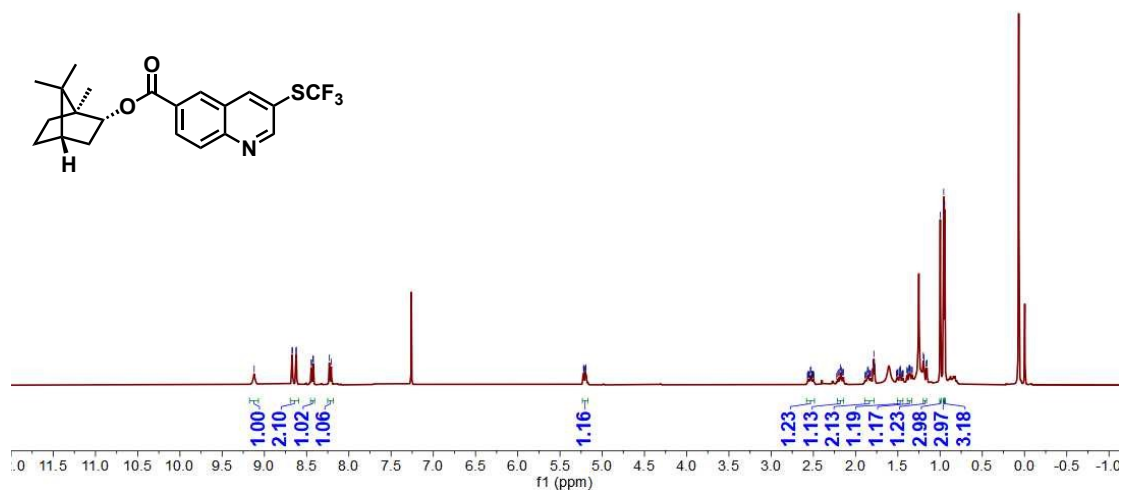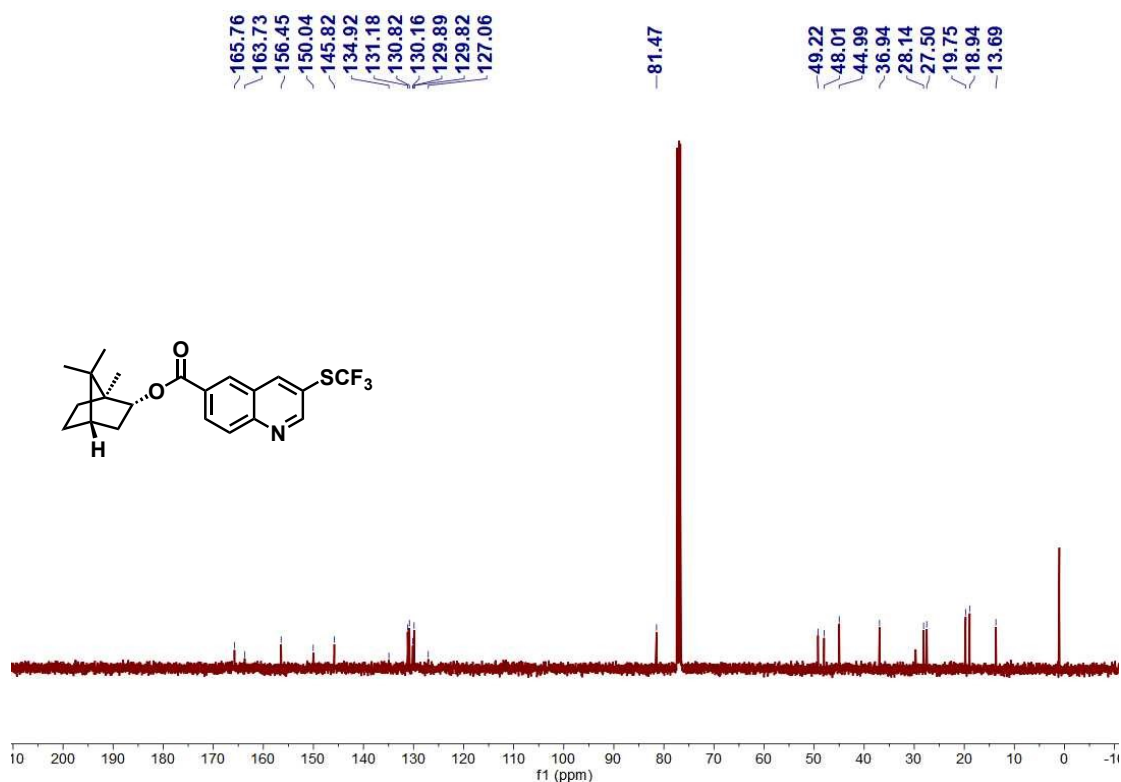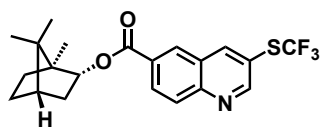

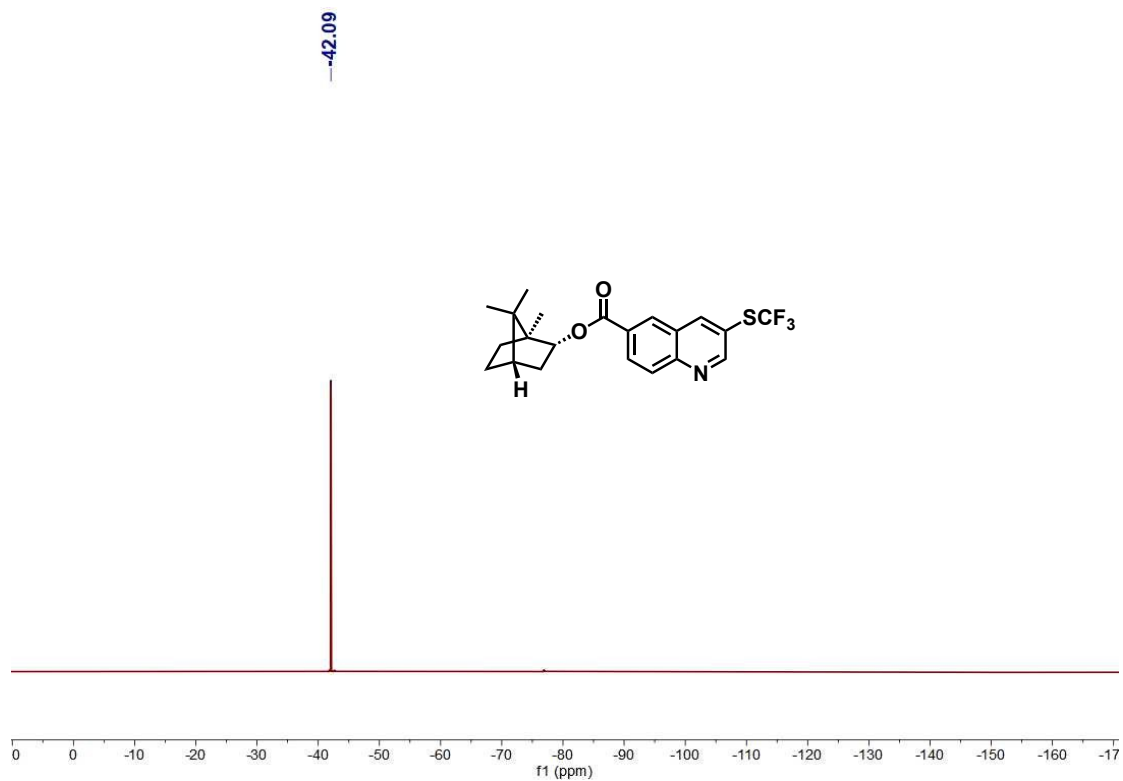

<sup>1</sup>H NMR and <sup>13</sup>C NMR of **7b**

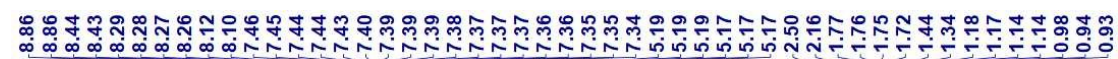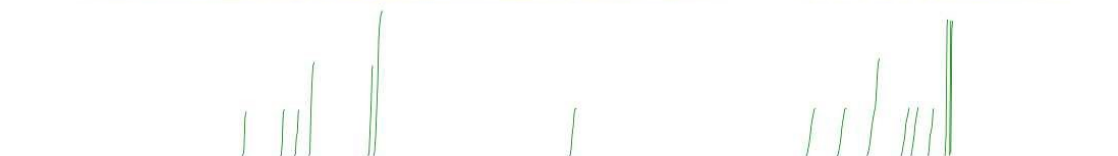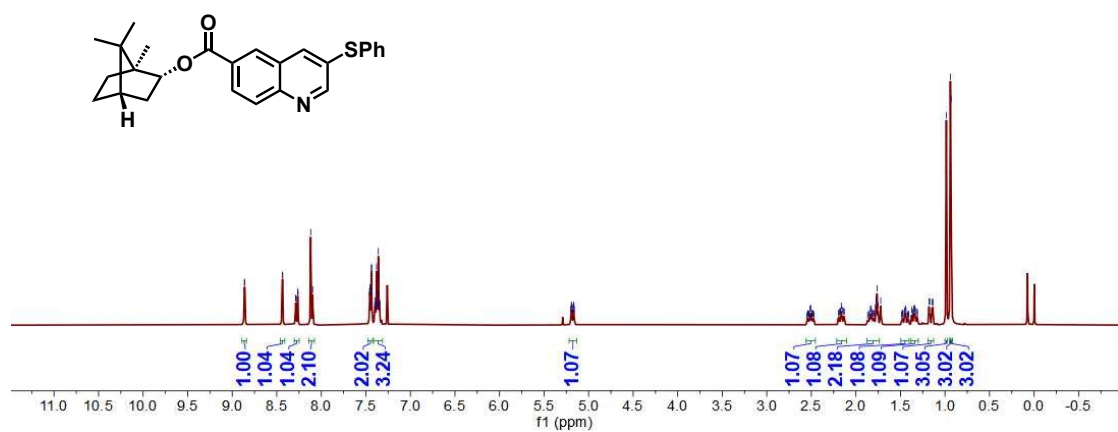

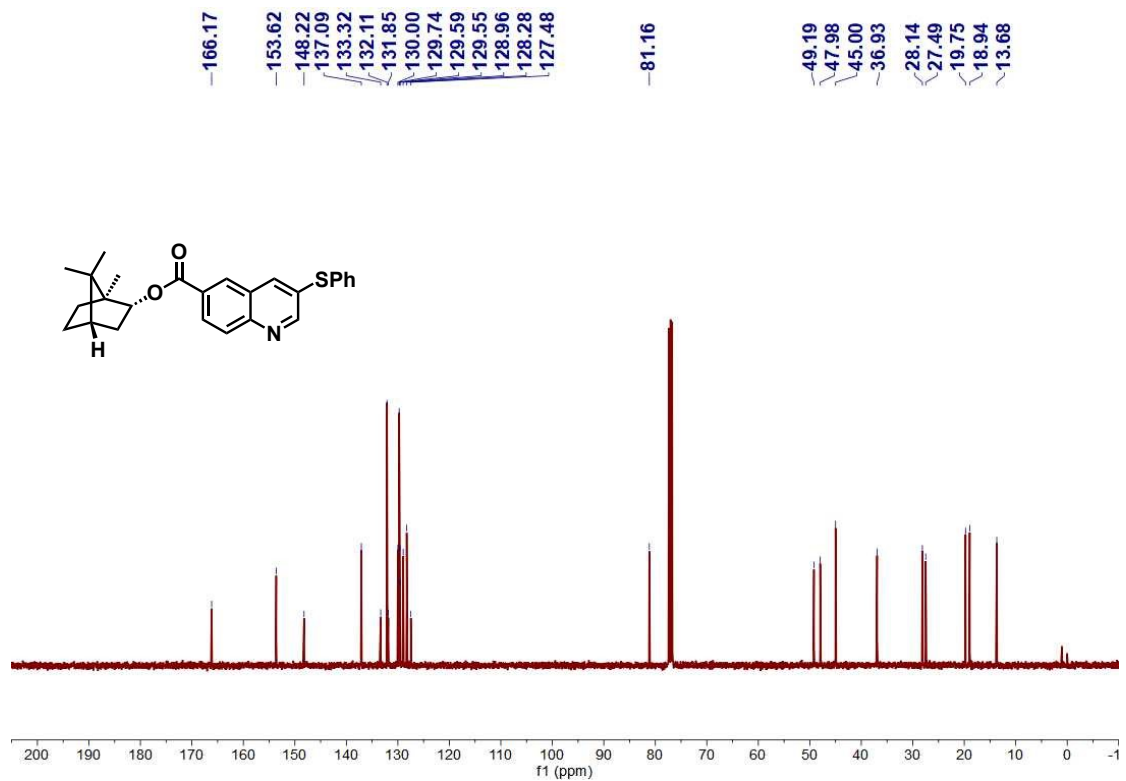

<sup>1</sup>H NMR, <sup>13</sup>C NMR and <sup>19</sup>F NMR of **8a**

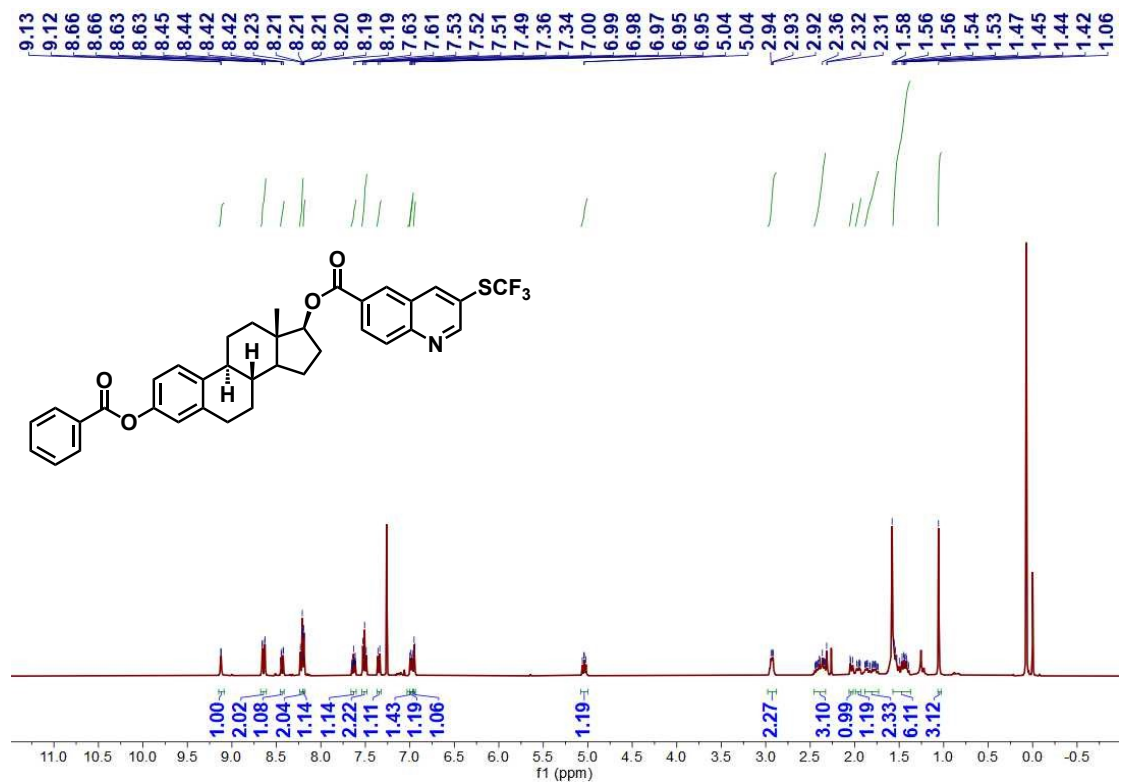



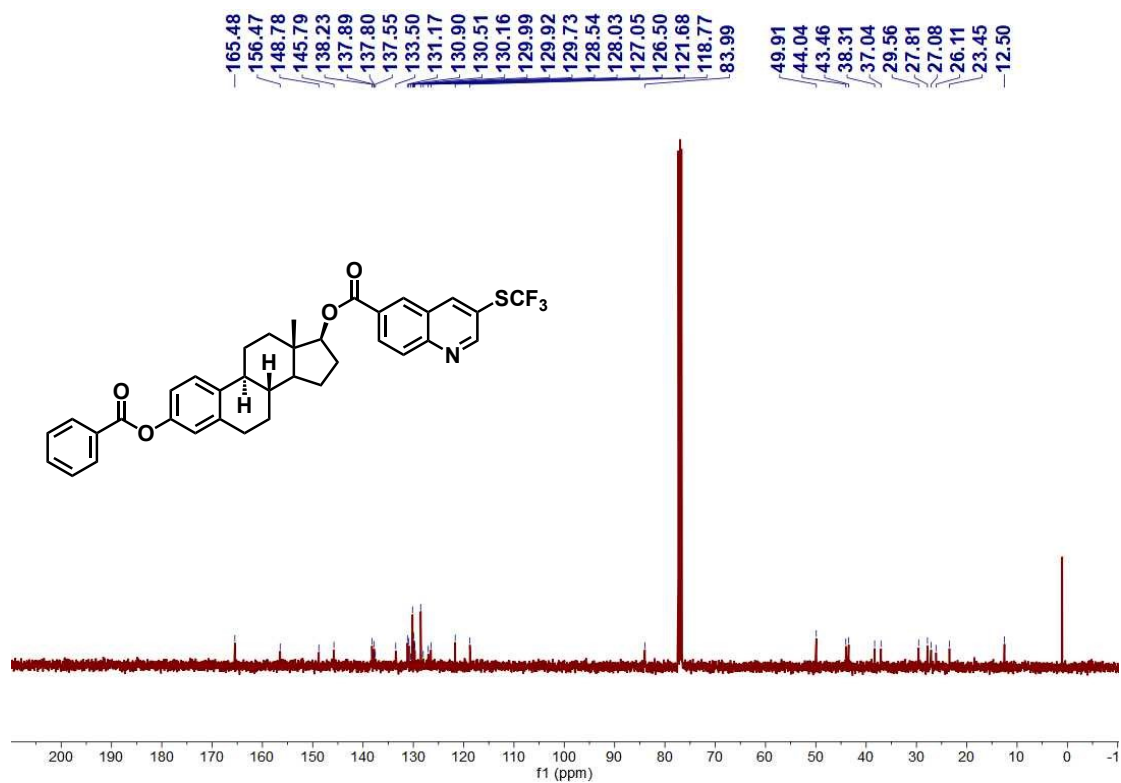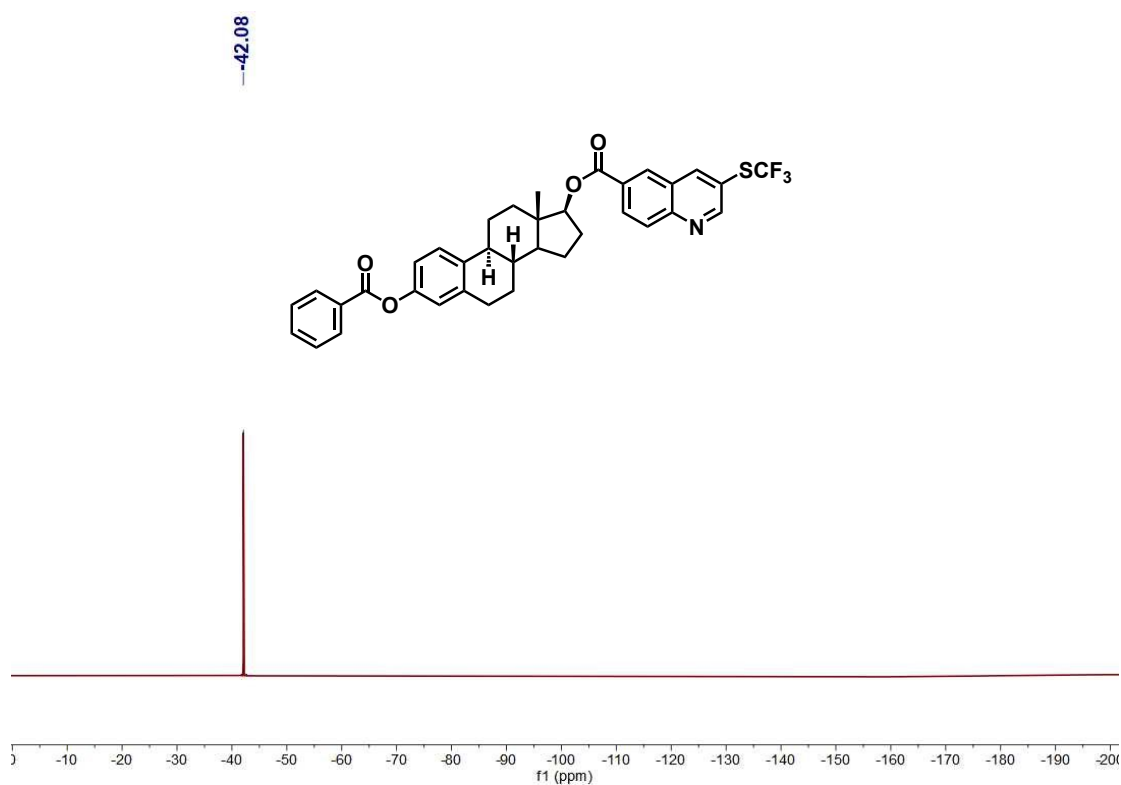

<sup>1</sup>H NMR and <sup>13</sup>C NMR of **8b**

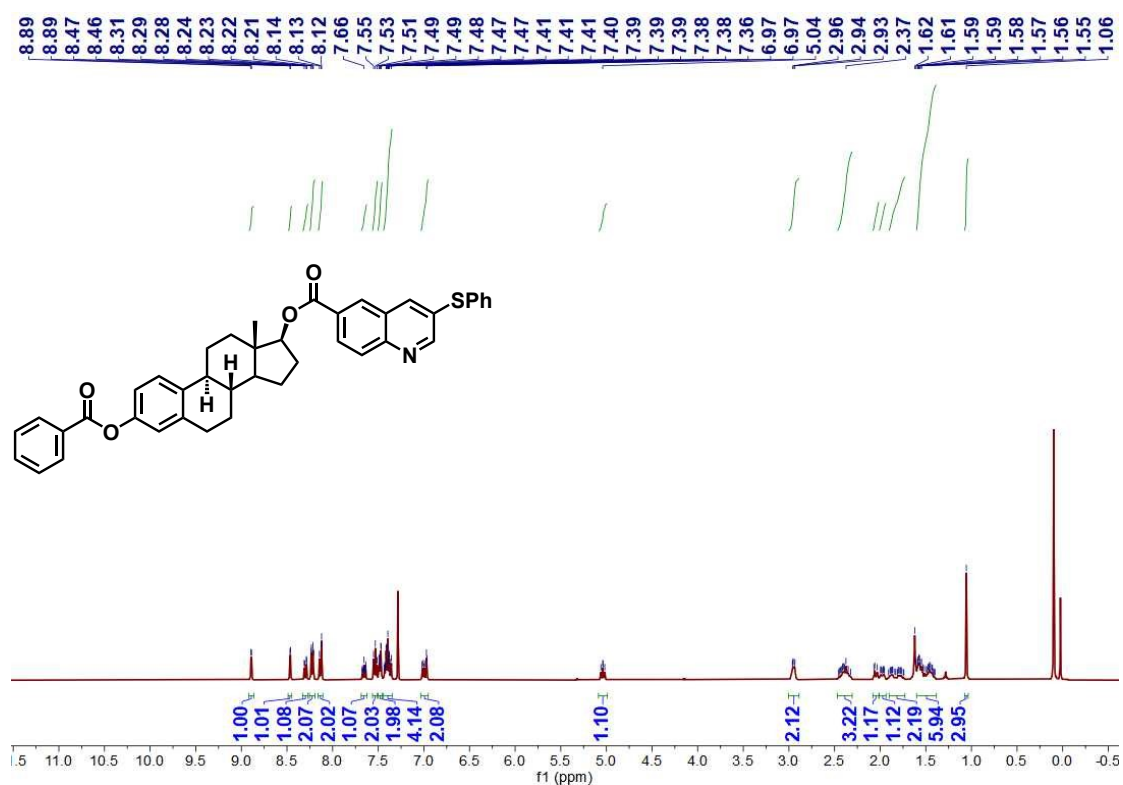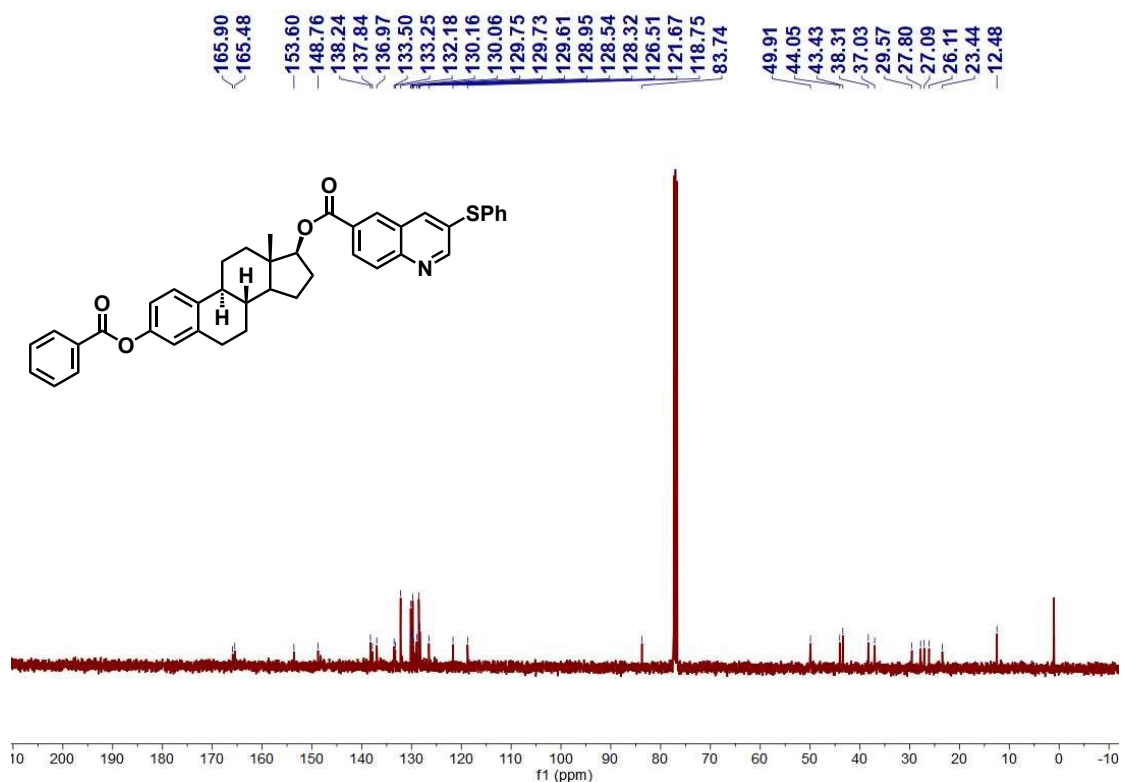

<sup>1</sup>H NMR, <sup>13</sup>C NMR and <sup>19</sup>F NMR of **9a**

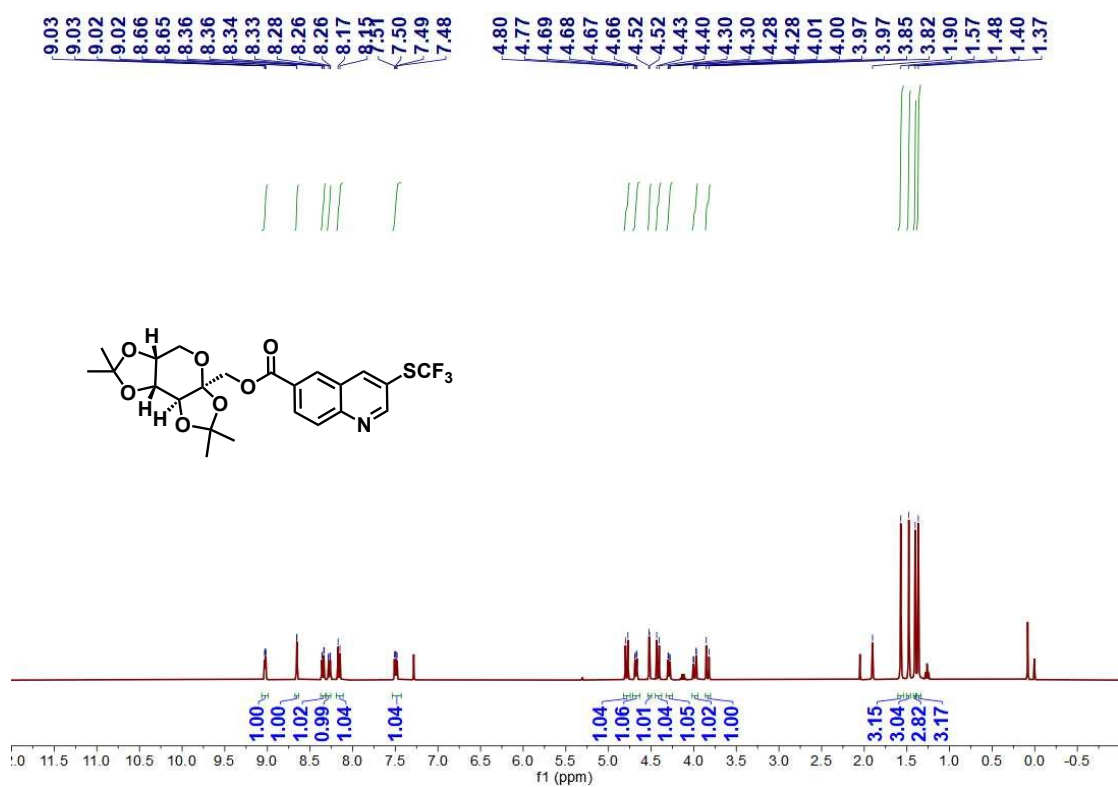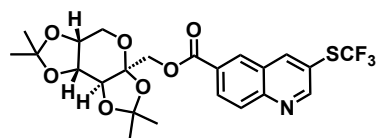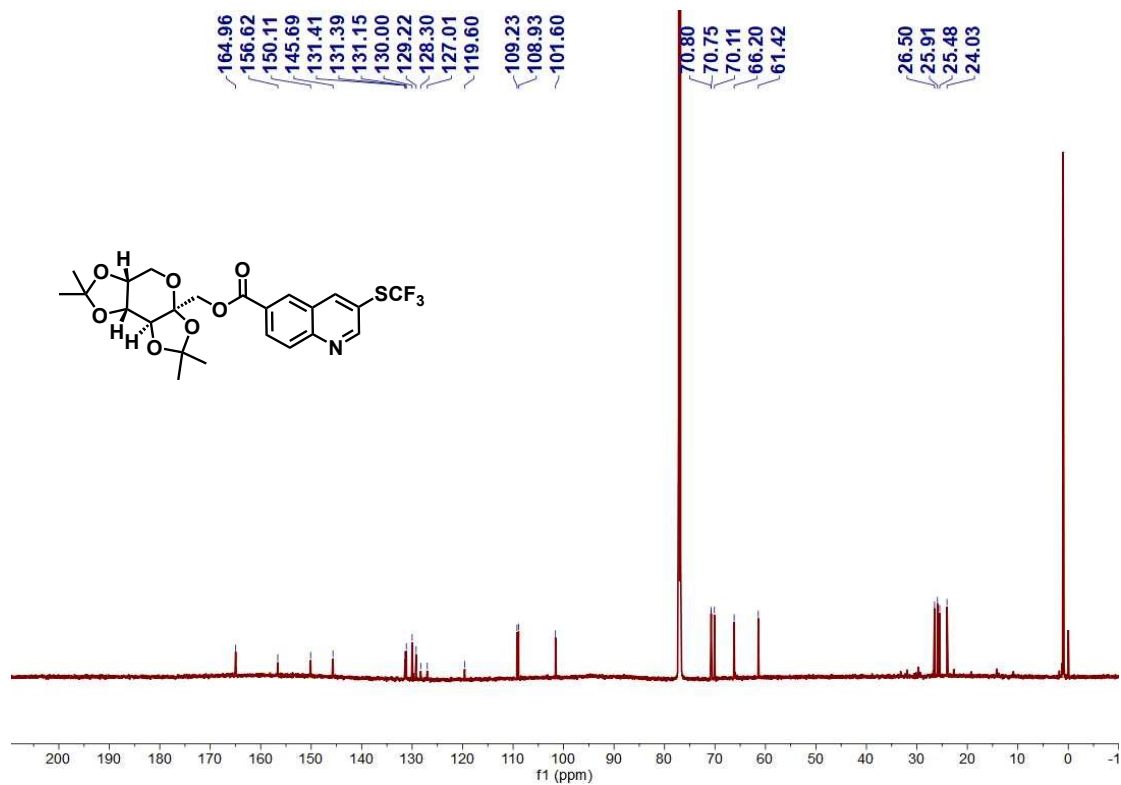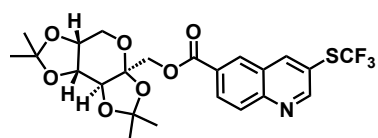

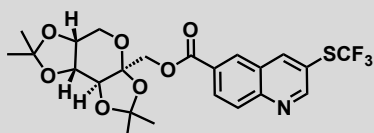

<sup>1</sup>H NMR and <sup>13</sup>C NMR of **9b**

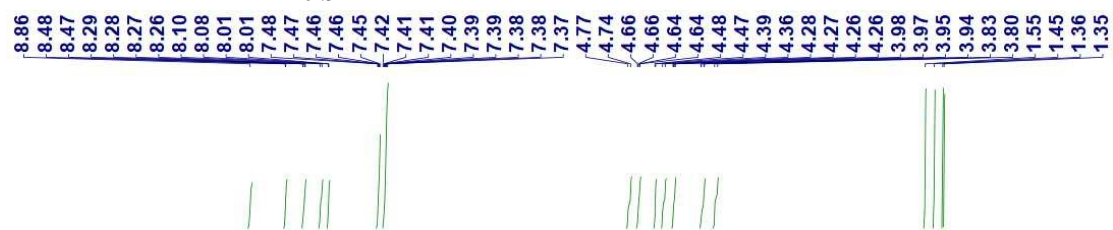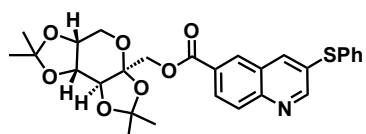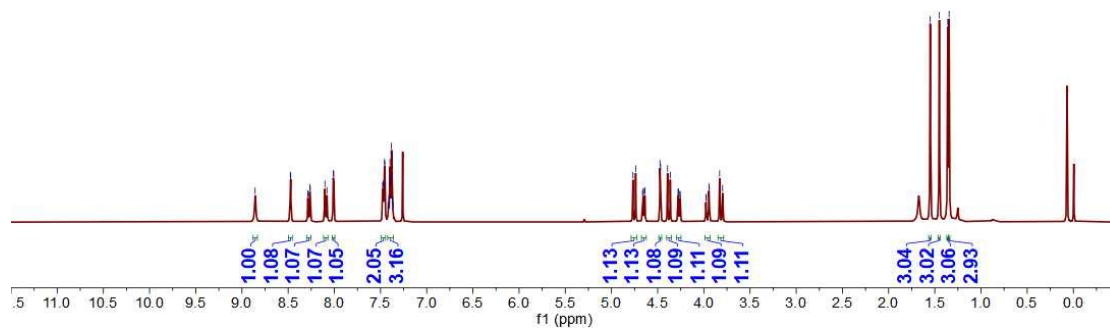

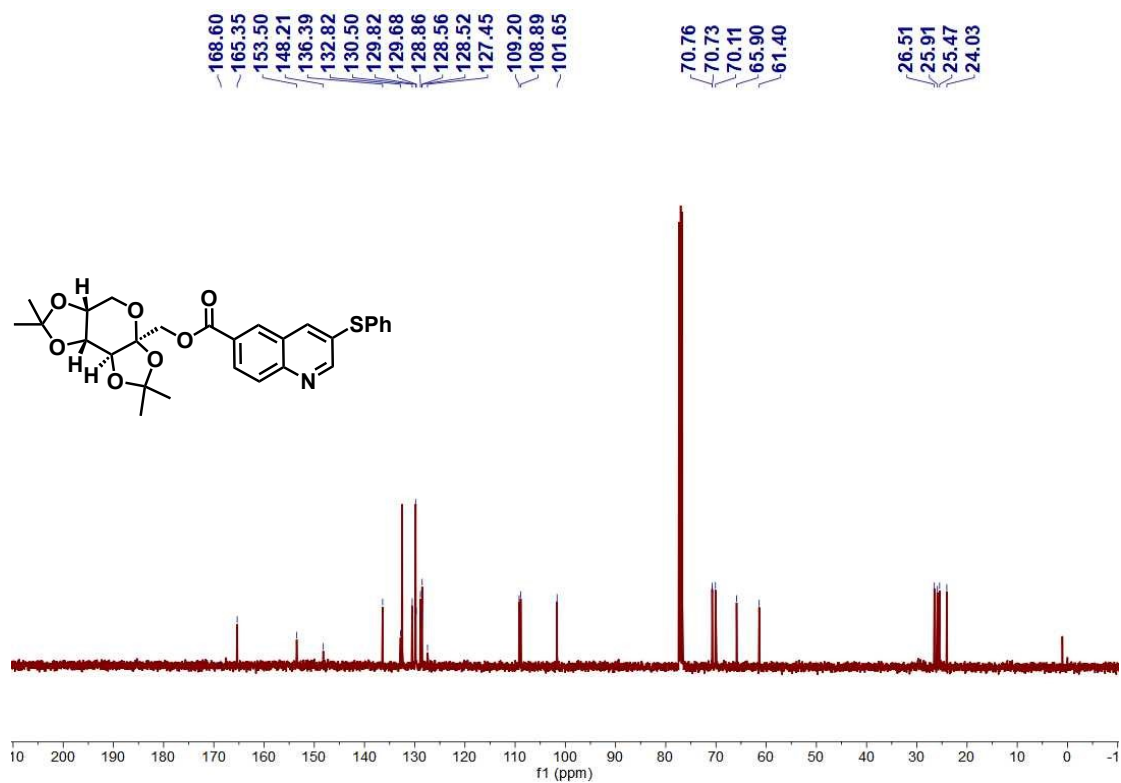

**<sup>1</sup>H NMR, <sup>13</sup>C NMR and <sup>19</sup>F NMR of 10a**

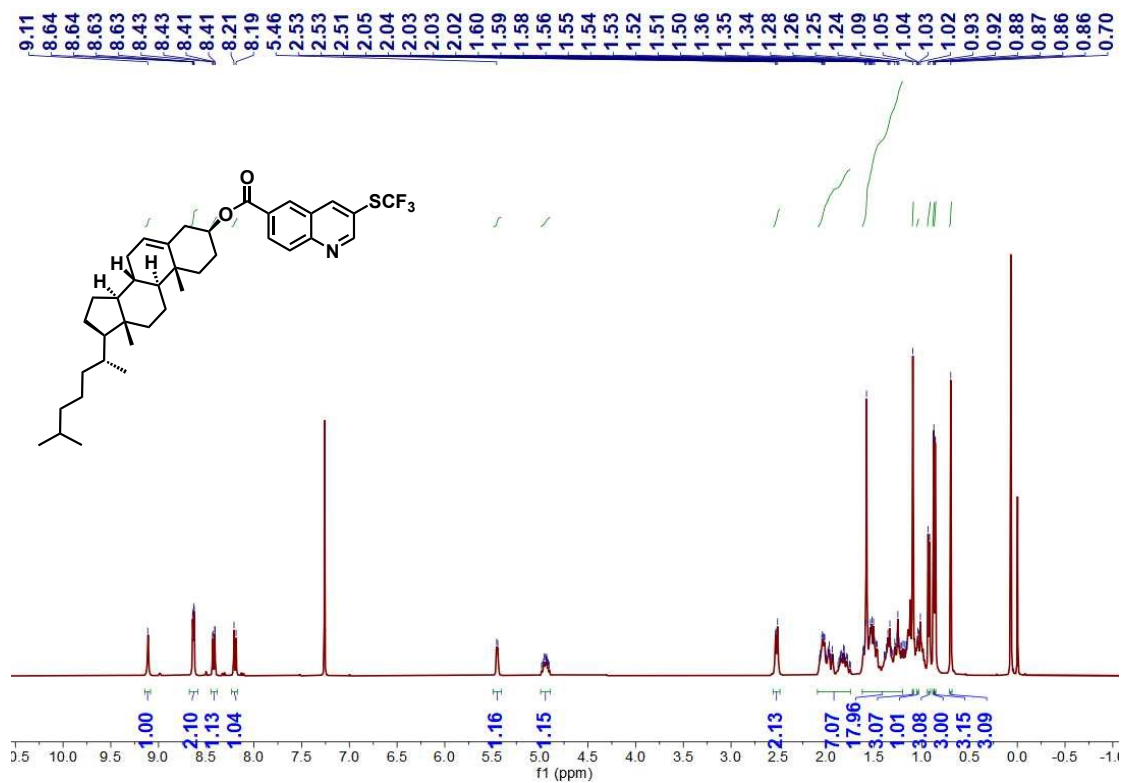

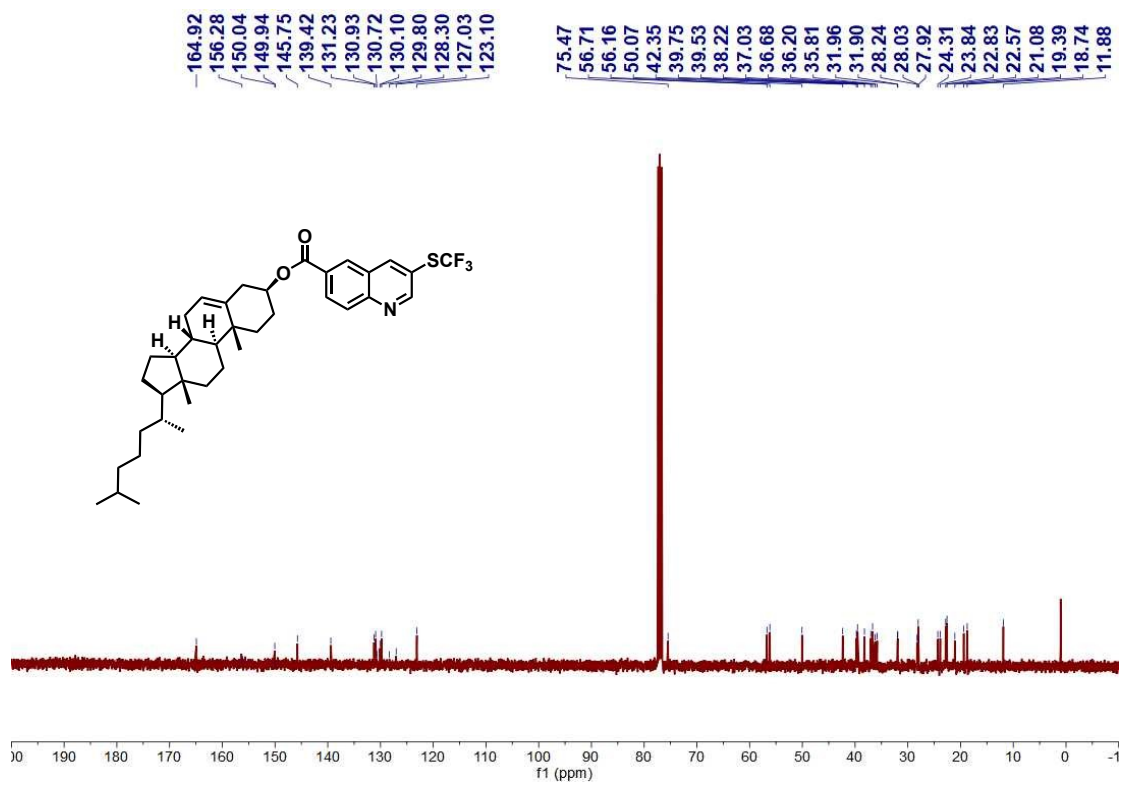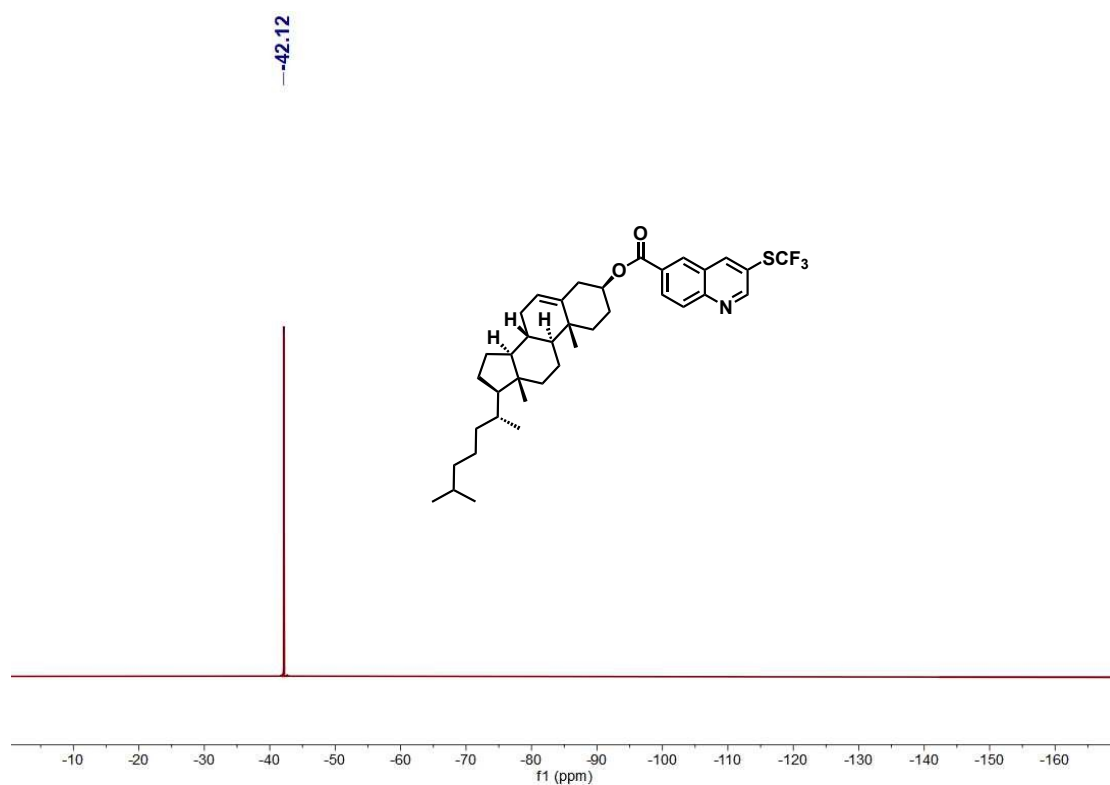

<sup>1</sup>H NMR and <sup>13</sup>C NMR of **10b**

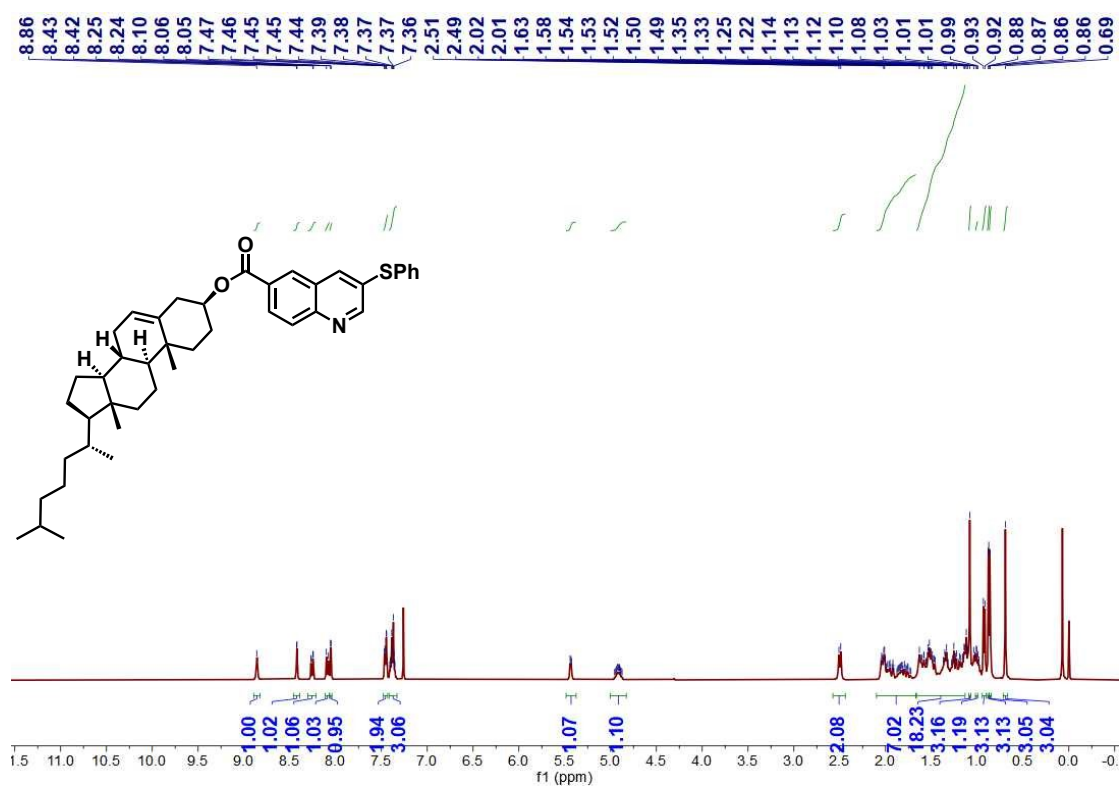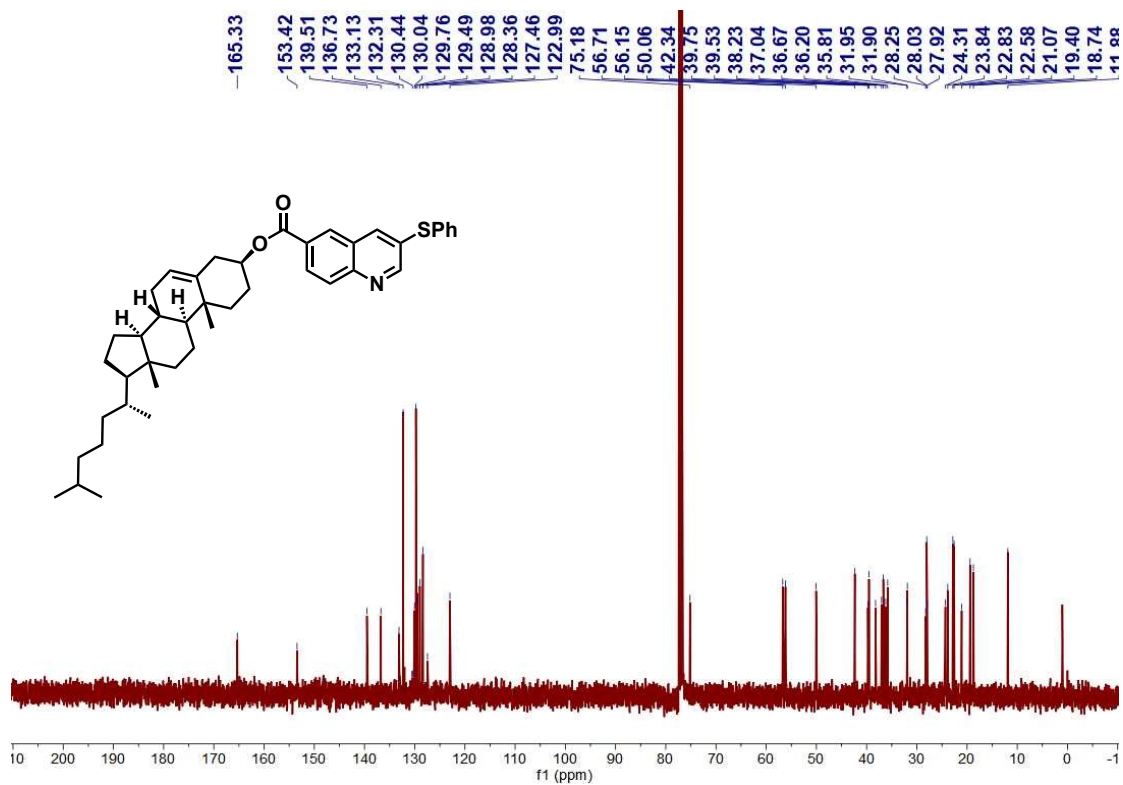

Supplement: d3qo00244f1.pdf [file d3qo00244f1.pdf]
